# Supplementary material for: Intermittent PI3Kδ inhibition sustains anti-tumour immunity and curbs irAEs
Source: Nature. 2022 May 4;605(7911):741–6. doi: 10.1038/s41586-022-04685-2 (PMC9132770; doi:10.1038/s41586-022-04685-2)
Supplement: Supplementary file 8 — Source Data Extended Data Fig. 2 [file 41586_2022_4685_MOESM8_ESM.xlsx]

## Sheet: CD4 Pre vs Post
Differential gene expression analysis. CD4 Pre vs Post
	MAST - Likelihood ratio test				Mean expression (CPM)		Fraction of expressing cells (CPM>0)
gene name	unshr_log2FoldChange	log2FoldChange	pvalue	padj	PRE	POST	PRE	POST
HBEGF	1.16	3.25	5.88298e-16	1.79642e-14	0	33.84	0	3.57
MYO18A	0.68	3.16	6.09644e-07	3.87319e-06	1.22	12.86	2.32	4.22
SWI5	1.07	3.09	2.14939e-12	3.70972e-11	5.29	39.03	1.45	3.25
RBMXL1	0.89	3.08	4.94189e-09	4.80905e-08	8.29	25.54	7.25	12.66
SEC24A	1.15	3.07	2.95459e-14	7.01305e-13	2.83	16.16	1.45	4.22
MDM1	1.54	2.97	4.2087e-23	3.38815e-21	1.52	13.3	1.74	6.17
TRBV7-6	1.2	2.86	2.61767e-16	8.48861e-15	88.62	517.19	4.06	10.39
SNRNP48	1.05	2.83	4.09783e-13	7.83626e-12	2.07	29.4	0.58	3.25
CSF2	2.12	2.83	8.00762e-39	4.3897e-36	9.62	205.64	0.29	5.19
CASP10	0.85	2.82	6.59776e-10	7.52014e-09	0.73	12.1	2.03	4.87
TRAPPC6B	2.07	2.81	8.05816e-38	3.86523e-35	10.07	45.09	2.32	6.17
PRKAB2	0.99	2.81	4.89553e-11	6.67741e-10	3.66	15.87	2.03	3.57
GCA	1.68	2.8	5.48258e-23	4.23594e-21	8.93	25.46	4.06	6.49
GPD2	1.05	2.77	5.00809e-15	1.33149e-13	0.02	4.28	0.58	3.57
VCPIP1	2.75	2.75	3.7523e-46	5.39957e-43	6.78	20.73	3.77	9.09
C19orf47	0.68	2.75	1.20223e-07	8.81531e-07	1.32	11.89	0.29	1.62
PAOX	1.13	2.74	2.24628e-14	5.45552e-13	2.11	23.15	0.58	4.22
TRIB3	0.84	2.72	1.25747e-07	9.18528e-07	17.18	46.63	1.74	3.57
HSPA13	0.62	2.7	5.53989e-06	2.85093e-05	1.25	16.89	1.16	3.25
LRRC14	1.24	2.65	4.60419e-13	8.73203e-12	8.35	34.02	2.61	6.82
TRAV1-2	1.68	2.63	1.86525e-25	1.95207e-23	83.21	319.65	1.16	5.84
SAMD8	1.71	2.62	4.99761e-21	3.0766e-19	14.2	35.19	5.22	8.44
ACVR1	0.6	2.61	1.18153e-05	5.65551e-05	4.39	19.81	1.74	3.57
TAMM41	0.71	2.59	9.92147e-06	4.82943e-05	12.17	38.6	2.9	8.12
ZNF563	0.54	2.57	1.68365e-05	7.77153e-05	1.09	32.99	0.58	3.25
SNAPC2	2.44	2.57	7.92481e-40	4.56152e-37	23.29	71.4	2.61	6.49
ACADM	1.94	2.57	1.33771e-23	1.12407e-21	10.07	24.82	4.35	6.82
TSPAN13	0.27	2.55	0.0215114	0.0444273	0	24.24	0	2.27
ITPRIPL1	0.69	2.54	1.65777e-05	7.66438e-05	33.07	90.8	2.32	4.22
TOMM34	0.86	2.5	3.36186e-11	4.66285e-10	9.24	34.34	1.16	3.25
SPTSSA	1.15	2.49	1.1207e-15	3.29121e-14	5.18	25.02	0.58	2.92
YEATS4	2.13	2.46	2.28484e-33	5.97798e-31	26.09	75.59	2.61	6.82
HIST2H2BE	1.75	2.46	1.7067e-27	2.45594e-25	13.32	52.12	2.32	4.87
RPUSD4	1.48	2.45	1.74285e-20	1.01332e-18	9.6	24.01	1.16	3.57
TMEM161A	1.9	2.44	7.46028e-28	1.13004e-25	19.55	38.18	2.03	6.17
PTGER2	3.17	2.44	5.56668e-41	3.76963e-38	71.5	134.9	6.67	12.01
ASB7	0.65	2.43	8.72215e-07	5.36088e-06	5.3	16.37	2.61	4.55
NABP2	1.44	2.41	3.03636e-20	1.72981e-18	16.77	51.59	2.61	5.52
MTMR6	1.08	2.4	2.58272e-11	3.65261e-10	3.45	18.88	2.61	6.17
PHF5A	0.94	2.4	1.50338e-11	2.19771e-10	8.01	58.29	1.45	3.57
SPG20	1.21	2.39	4.05969e-18	1.71191e-16	2.84	9.72	1.16	3.25
ZNF449	0.95	2.39	1.08566e-11	1.63587e-10	0.92	3.88	0.87	1.95
ZSCAN22	0.56	2.39	7.06358e-06	3.5618e-05	0.05	7.92	0.58	2.27
SEPSECS	0.46	2.39	0.000207227	0.000736523	3.35	7.78	1.16	3.25
MEX3C	1.28	2.38	2.62822e-20	1.5128e-18	1.28	10.88	1.16	5.52
HENMT1	2	2.37	2.13223e-33	5.70842e-31	19.61	68.75	2.32	5.84
GZMH	2.51	2.36	2.12603e-34	6.27561e-32	67.47	298	1.74	10.06
CLIC5	0.88	2.35	2.60154e-09	2.64313e-08	3.28	13.25	2.32	6.17
TRBV29-1	0.68	2.35	7.85579e-07	4.87525e-06	6.07	195.28	0.58	2.92
SMIM14	1.57	2.35	3.05031e-20	1.72981e-18	6.65	17.73	2.61	4.55
GORASP1	1.73	2.33	1.60766e-26	2.03378e-24	8.28	34.92	1.45	7.47
ZNF441	0.41	2.32	0.000522812	0.0016737	0.24	13.69	0.29	1.95
CXorf21	0.62	2.32	2.25173e-06	1.26079e-05	8.91	36.18	1.16	3.25
GTF2F1	0.8	2.31	3.88534e-07	2.57058e-06	13.36	49.09	4.64	7.79
PDE9A	0.54	2.31	2.29127e-05	0.000102635	1.21	8.47	0.87	1.95
TWISTNB	2.66	2.31	1.32003e-45	1.51962e-42	11.43	35.71	3.19	7.47
REC8	2.04	2.3	4.80089e-34	1.348e-31	9.1	43.55	2.32	6.17
BCL2L14	0.94	2.29	1.65031e-11	2.39472e-10	0	8.39	0	2.6
DEF8	2.24	2.28	2.185e-36	8.11411e-34	7.61	32.13	2.9	6.82
FASLG	1.1	2.27	1.18661e-14	2.98912e-13	12.64	60.25	0.87	3.9
DERA	1.18	2.26	4.66104e-17	1.74214e-15	8.88	20.65	2.03	5.84
MLXIP	1.13	2.25	5.76791e-12	9.14603e-11	3.09	10.92	5.22	8.77
FBXO30	1.35	2.25	3.46831e-19	1.72845e-17	2.33	22.34	0.58	2.6
ZNF140	0.99	2.24	1.01888e-10	1.32534e-09	7.66	22.76	2.32	3.9
CLN8	1.35	2.24	6.22115e-20	3.41037e-18	3.95	11.63	1.45	3.25
OSM	2.57	2.22	4.27346e-44	3.78431e-41	36.87	103.53	2.32	5.52
PLA2G16	1.03	2.2	8.68304e-13	1.58918e-11	6.54	33.76	1.16	5.19
CRYZ	0.71	2.2	6.99893e-07	4.39562e-06	7.77	23.51	2.61	4.55
NCAPD2	2.5	2.19	8.08342e-46	1.03396e-42	7.46	26.88	4.06	7.79
ANGPT2	0.28	2.19	0.0178608	0.0377342	0.18	4.25	0.87	2.6
ATIC	3.42	2.19	1.21572e-51	2.79908e-48	24.07	90.12	4.06	11.36
GAPVD1	1.28	2.19	1.74325e-13	3.60292e-12	4.69	9.91	4.64	6.17
ERAL1	1.18	2.17	6.33786e-14	1.40581e-12	23.01	86.25	1.45	4.55
KCTD5	1.49	2.17	9.49828e-20	5.06406e-18	11.7	39.38	3.48	7.14
CHAF1B	0.96	2.16	8.09747e-10	9.11223e-09	1.66	7.37	1.16	2.6
ZIK1	-0.51	2.16	5.20628e-05	0.000214424	5.01	4.72	1.45	0.65
TRAPPC2	3.05	2.16	1.67619e-51	3.21606e-48	27.14	32.34	9.28	13.96
OLA1	3.39	2.15	1.8977e-57	2.18463e-53	8.72	26.05	2.61	8.77
PIK3R4	0.76	2.15	1.55768e-07	1.11587e-06	4	13.14	2.32	3.57
SEC24B	0.89	2.15	2.24668e-07	1.55869e-06	16.33	28.43	6.38	7.14
FAM120A	1.95	2.14	4.91269e-27	6.73272e-25	6.93	21.03	4.93	8.44
RAB22A	1.72	2.14	7.02903e-24	6.13017e-22	5.55	15.53	4.35	9.42
ICK	1.36	2.13	1.99923e-18	8.95532e-17	7.3	17.6	2.03	3.25
TMEM184B	1.69	2.13	1.34765e-25	1.4636e-23	7.72	35.24	3.19	7.79
UAP1L1	0.7	2.13	2.00269e-07	1.40237e-06	0.33	15.85	1.45	2.6
EPHA1	1.69	2.13	5.55419e-29	9.9906e-27	5.55	23.45	2.03	4.55
NTRK1	0.66	2.12	2.82749e-07	1.92263e-06	0.1	14.66	0.29	3.25
BRD1	1.84	2.12	7.6211e-33	1.82779e-30	6.13	19.19	1.74	5.52
CACNB1	-0.64	2.12	1.77736e-06	1.01644e-05	1.04	2.22	0.87	1.3
MTHFD2L	0.61	2.11	6.29844e-06	3.20846e-05	1.37	3.32	1.45	2.6
NOC4L	1.98	2.11	3.71836e-34	1.07014e-31	39.1	82.93	2.9	6.17
TIRAP	0.83	2.11	6.21163e-09	5.93923e-08	0.89	4.82	1.16	1.62
PPIL1	0.59	2.11	1.41593e-05	6.65311e-05	2.54	39.07	1.45	3.57
TET1	1.35	2.11	5.1652e-20	2.87255e-18	1.64	6.13	1.16	4.22
PTPN13	0.52	2.1	0.001838	0.00511088	7.61	23.37	4.06	5.84
TRAJ9	0.55	2.1	3.0594e-06	1.65663e-05	1.1	61.57	0.58	3.9
OXSM	0.82	2.1	7.08222e-08	5.46818e-07	8.45	34.52	1.16	2.92
ARMC1	0.98	2.1	7.29061e-09	6.87947e-08	26.31	73.58	3.48	6.17
RNF146	0.92	2.1	8.96651e-10	1.00216e-08	14.59	33.46	2.03	2.92
ZEB2	2.51	2.09	1.30287e-49	2.14267e-46	4.52	10.54	2.03	7.47
C4orf26	1	2.09	2.43435e-13	4.86532e-12	0.11	15.06	1.16	1.95
ZNF805	0.45	2.09	0.000224277	0.000791502	0.07	18.51	0.29	1.62
GZMB	2.59	2.08	9.43826e-22	6.31705e-20	1008.49	4063.98	9.28	28.25
AP4M1	0.45	2.08	0.000284217	0.000977487	0.06	5.61	0.29	2.27
XPO7	0.86	2.07	2.40515e-09	2.45898e-08	4.39	16.6	2.03	2.92
DLAT	0.86	2.07	1.07097e-09	1.17868e-08	3.9	16.29	1.45	3.57
BLZF1	1.99	2.07	2.04762e-28	3.32003e-26	14.6	41.21	2.9	8.12
LMBR1	1.8	2.07	2.28393e-22	1.63308e-20	7	18.94	5.8	9.42
FANCI	0.66	2.07	3.48467e-06	1.86324e-05	1.17	4.6	3.19	2.27
CSNK1E	-0.35	2.06	0.00968066	0.0220724	3.87	13.61	4.35	4.22
TM9SF4	1.31	2.06	6.17157e-17	2.24123e-15	7.99	22.92	3.19	7.14
PECR	0.59	2.06	8.7407e-05	0.000338858	14.58	36.11	3.19	5.19
FBXL8	0.97	2.06	5.83206e-12	9.22235e-11	2.01	15.48	1.45	4.55
SLC25A42	0.86	2.05	2.33007e-08	2.01986e-07	10.17	13.4	2.61	3.57
BRCA1	0.27	2.05	0.0235161	0.0478384	0.46	5.52	0.87	1.62
DDX23	1.43	2.04	4.08288e-16	1.27662e-14	9.8	33.36	4.35	5.84
RRN3	1.17	2.04	4.62574e-13	8.75847e-12	6.89	18.82	8.12	12.01
MTMR8	-0.55	2.04	0.000181277	0.00065604	9.42	7.3	1.16	1.3
AHCYL1	1.67	2.03	7.20881e-27	9.64975e-25	5.48	15.11	1.74	4.22
TIMMDC1	1.72	2.03	2.78551e-15	7.68988e-14	23.18	91.18	5.22	12.34
NUDT4	0.92	2.03	9.29008e-10	1.03331e-08	2.9	13.42	3.77	6.17
ARIH1	0.59	2.03	6.12766e-06	3.13379e-05	0.76	10.04	1.74	2.6
RHBDD1	1.16	2.02	1.31273e-11	1.93745e-10	6	20.77	5.22	7.47
LAYN	1.26	2.02	6.22339e-11	8.35007e-10	22.21	94.58	4.35	10.39
SARDH	1.02	2.02	5.67592e-09	5.47247e-08	17.16	37.08	3.19	5.84
NAT6	0.57	2.02	4.94597e-05	0.000204961	4.83	21	1.74	3.57
TRAV21	0.35	2.01	0.0135299	0.0296114	197.82	445.5	2.03	3.57
ZNF557	0.75	2.01	2.60364e-09	2.64313e-08	2.48	14.06	0.87	3.25
TRBV23-1	1.62	2.01	1.47442e-24	1.43843e-22	63.75	713.69	0.58	2.6
CCP110	-0.74	2.01	2.10007e-08	1.83151e-07	2.33	18.66	2.03	2.92
RHBDF2	1.07	2	1.03496e-11	1.56357e-10	9.13	29.72	4.64	8.77
NCDN	2.9	2	1.89589e-44	1.98413e-41	10.43	35.35	4.64	10.71
ANKMY2	1.58	2	5.54765e-27	7.51348e-25	22.56	38.14	2.03	5.19
GLTPD1	0.88	2	2.77491e-07	1.89325e-06	16.64	35.28	3.48	5.84
HAUS1	1.17	1.99	3.97687e-11	5.46974e-10	29.76	58.12	4.35	6.82
GTF2A2	2.02	1.99	3.42245e-18	1.47012e-16	43.32	110.37	7.25	14.61
SEC31B	0.85	1.99	1.13361e-07	8.35476e-07	3.41	22.7	4.35	5.52
CCDC136	0.6	1.99	2.7267e-06	1.49546e-05	1.4	8.54	1.16	3.25
ZMAT2	1.82	1.98	9.71213e-26	1.07506e-23	32.99	57.68	2.61	7.47
NIPSNAP1	1.21	1.98	2.50939e-11	3.56643e-10	39.63	71.33	5.8	6.49
DOK1	0.63	1.97	1.35038e-06	7.93544e-06	7.23	14.81	1.16	2.92
RPRD1B	1.78	1.97	2.8047e-30	5.56684e-28	1.86	17.53	1.74	5.84
ADSS	1.66	1.97	4.6398e-23	3.63357e-21	9.31	29.85	4.06	8.44
LGMN	0.5	1.97	5.63789e-05	0.000229909	3.61	10.94	0.58	1.62
CARS2	2.31	1.96	5.33425e-28	8.29837e-26	4.99	16.75	3.77	8.12
FBXO2	0.7	1.96	4.76146e-08	3.8412e-07	0.03	17.93	0.29	2.6
HDAC6	1.59	1.96	2.11354e-17	8.11036e-16	7.73	14.57	4.64	7.79
PLEKHB1	2.09	1.96	3.77899e-38	1.89147e-35	17.76	20.62	1.74	2.92
ZBTB2	0.73	1.96	4.46689e-08	3.63669e-07	5.47	26.75	1.45	5.19
NAA16	1.62	1.95	2.04164e-16	6.77331e-15	22.3	37.87	6.96	9.09
NMB	0.43	1.95	0.00139419	0.00400646	17.41	63.96	1.16	2.27
FBXW2	1.19	1.94	8.37458e-12	1.28396e-10	10.91	19.41	5.8	11.69
PAICS	1.66	1.94	1.54316e-22	1.12436e-20	10.51	20.21	2.32	5.84
NETO2	0.52	1.94	2.62356e-05	0.000115985	1.16	7.04	0.87	1.95
CYP2R1	1.34	1.94	7.61365e-19	3.65201e-17	14.68	25.15	2.32	4.87
UBE2Q2	0.96	1.94	5.26991e-09	5.1196e-08	10.73	25.51	4.64	6.49
STMN1	2.45	1.94	1.39919e-25	1.50537e-23	22.61	47.83	3.19	8.12
PPP1R12B	0.65	1.94	1.51665e-05	7.06867e-05	1.3	8.7	2.61	5.19
FZR1	1.29	1.93	2.4721e-14	5.95372e-13	11.74	24.94	4.06	5.19
PAPSS1	0.73	1.93	9.89599e-06	4.82314e-05	27.19	47.28	2.9	6.17
ABAT	0.93	1.93	1.45893e-09	1.55945e-08	2.6	10.21	1.45	5.19
C17orf75	1.25	1.92	6.30025e-19	3.09951e-17	8.01	24.63	1.74	3.9
FAM174B	0.5	1.92	0.000345763	0.00115878	4.53	11.16	2.03	3.9
TSGA10	0.61	1.92	4.00708e-06	2.11312e-05	3.18	16.76	2.32	3.25
CCDC18	1.12	1.92	4.28909e-10	4.99757e-09	12.53	30.56	6.38	7.14
WARS2	1.11	1.91	2.97629e-15	8.17733e-14	7.23	27.56	1.74	4.55
UBE2H	0.8	1.91	4.20047e-06	2.203e-05	7.06	19.86	5.22	6.17
MTF2	2.57	1.9	7.16176e-26	8.3279e-24	44.78	81.21	9.57	14.29
TRIM52	0.89	1.9	1.61049e-09	1.71033e-08	6.29	21.71	2.61	3.57
USP45	-0.32	1.9	0.00909158	0.020874	0.79	9.02	1.45	1.95
KCTD2	0.43	1.9	0.000477334	0.00154399	0.19	8.16	0.29	2.27
CD81	1.74	1.9	3.10102e-22	2.17676e-20	9.84	22.27	5.22	7.79
TMEM14A	1.32	1.9	1.24823e-11	1.847e-10	132.11	190.9	6.96	10.06
MRM1	0.46	1.9	0.000517177	0.00165658	0.78	13.77	0.29	1.95
MBIP	1.07	1.89	1.84511e-13	3.7728e-12	7.62	26.26	1.74	5.19
ARL3	1.44	1.89	1.73166e-17	6.73476e-16	13.28	23.62	4.06	8.77
EOGT	0.82	1.89	1.11416e-08	1.01795e-07	22.41	12.51	1.74	3.57
ORC5	2.28	1.89	1.27494e-37	5.77786e-35	24.28	41.51	2.9	5.52
TMEM183A	1.94	1.88	9.5017e-20	5.06406e-18	22.88	51.46	5.51	12.66
NFATC1	1.78	1.88	5.80979e-22	3.98109e-20	10.57	30.81	4.93	9.74
GTF3C4	-0.76	1.88	5.87239e-08	4.63034e-07	3.08	2.82	1.45	0.97
TMEM70	2.2	1.88	2.43622e-24	2.28015e-22	24.48	61.67	3.48	7.47
SLC35F5	0.52	1.88	0.000155851	0.000571207	4.47	10.23	2.61	3.9
ATP6V1B2	1.18	1.88	3.4309e-09	3.41075e-08	19.41	37.86	6.38	9.09
AP2B1	2.59	1.88	8.89566e-37	3.53127e-34	9.71	30.65	12.17	20.45
HSPA1A	1.85	1.88	1.60936e-17	6.28032e-16	53.81	191.77	12.75	24.35
PRDM15	-0.36	1.88	0.00562759	0.013636	1.23	4.87	2.61	2.92
PDIK1L	0.96	1.87	7.27388e-12	1.13005e-10	7.74	17.08	1.74	3.25
DIRAS3	0.36	1.87	0.00280161	0.00740677	0	18.67	0	0.97
DMAP1	1.34	1.87	1.72526e-14	4.26206e-13	8.8	30.94	2.9	5.84
EIF2D	1.17	1.87	1.17818e-10	1.51883e-09	33.13	70.88	4.93	6.82
HIPK3	0.45	1.86	0.00753732	0.0176648	9.68	14.71	3.77	5.19
CX3CR1	0.73	1.86	9.43233e-09	8.7287e-08	0.45	12.75	0.29	1.3
ELP4	1.11	1.86	4.47952e-12	7.22245e-11	13.43	37.73	1.74	3.25
C17orf80	0.55	1.85	0.000347031	0.00116202	3.79	5.81	1.74	2.27
PHF6	1.39	1.85	6.11563e-15	1.60007e-13	5.84	12.35	4.06	6.82
GEM	0.7	1.85	3.16522e-07	2.13604e-06	8.88	27.38	1.45	3.25
GTDC1	1.3	1.85	1.56637e-14	3.89462e-13	4.05	13.58	4.35	7.14
ANKRD13C	1.37	1.85	5.82579e-16	1.78368e-14	17.3	34.85	4.35	7.14
ZNF862	1.05	1.85	6.92956e-14	1.5253e-12	5.01	8.95	2.9	5.84
CKAP5	2.78	1.84	3.71892e-54	2.14061e-50	10.22	28.4	3.77	8.44
ZNF641	-0.43	1.84	0.00609366	0.0146329	18.68	20.93	2.32	2.6
CCL3	1.1	1.84	6.19934e-13	1.15108e-11	20.19	68.17	1.45	6.17
C10orf128	1.21	1.84	8.18817e-14	1.78189e-12	10.46	38.57	1.74	6.49
ZYG11B	0.51	1.83	2.00785e-05	9.11811e-05	1.65	5.48	0.87	2.6
GBE1	1.04	1.83	4.55156e-15	1.22424e-13	1.11	8.88	0.29	3.9
TESC	1.55	1.83	3.64221e-20	2.04532e-18	13.57	39.42	2.32	6.17
CDC23	1.26	1.83	3.60295e-13	6.95926e-12	24.33	28.95	4.35	4.87
CASS4	1	1.83	5.78539e-12	9.16112e-11	3.85	18.02	2.03	4.55
ATP13A2	0.31	1.83	0.0218741	0.0450553	4.59	12.48	2.03	4.22
ZNF574	0.51	1.83	0.00074253	0.00227704	6.83	11.71	1.74	2.92
PMEPA1	1.18	1.83	1.47761e-11	2.16415e-10	12.81	25.9	4.06	7.14
HIST1H2BJ	0.51	1.83	4.19099e-05	0.000177182	11.31	38.5	0.87	3.25
KCMF1	0.72	1.83	1.96745e-06	1.11189e-05	3.34	11.02	4.35	5.19
RNF2	0.93	1.82	1.87738e-10	2.34154e-09	1.75	8.25	2.9	6.49
BIVM	1.08	1.81	2.82082e-14	6.72325e-13	1.65	4.61	0.87	2.6
SMIM12	2.2	1.81	1.68714e-23	1.39729e-21	13.33	42.58	5.8	11.69
LACTB	0.48	1.81	0.00072253	0.00222459	6.22	19.64	1.74	3.57
DRG1	2.26	1.81	2.64089e-29	4.82571e-27	68.02	102.32	5.8	9.74
AK1	0.41	1.81	0.00132773	0.00383654	1.13	35.23	1.74	2.92
PAPD5	0.49	1.8	0.000917894	0.00275823	4.81	12.87	2.61	4.22
TTC9C	1	1.8	1.87476e-07	1.32244e-06	62.64	61.64	5.22	6.82
MBD1	1.3	1.8	5.46399e-09	5.27864e-08	20.61	56.77	6.67	10.06
DNAJC17	0.38	1.8	0.015513	0.0333929	16.07	31.06	4.93	5.19
DDX31	1.17	1.79	6.90559e-16	2.08108e-14	1.58	6.71	0.87	2.92
POMT1	1.45	1.79	4.79633e-14	1.09121e-12	18.77	31.02	5.8	8.12
ATPAF2	0.69	1.79	9.89526e-07	6.01964e-06	7.91	15.58	2.9	2.92
SPHK1	0.53	1.79	1.86827e-05	8.54831e-05	0	5.74	0	1.95
NMNAT1	0.7	1.79	1.91811e-07	1.34889e-06	4.17	14.06	2.32	3.9
TTF2	1.42	1.79	4.43631e-16	1.38029e-14	5.72	13.76	4.06	7.79
NAGA	1.25	1.78	3.02697e-13	5.92627e-12	22.39	51.78	3.19	5.84
ADAT3	0.37	1.78	0.00279514	0.00739376	0.7	12.33	0.29	2.27
MFSD11	1.32	1.77	4.77324e-14	1.08811e-12	11.12	18.06	3.77	7.14
CDK2	1.02	1.77	2.56365e-10	3.12967e-09	9.32	25.22	5.22	7.47
CCL4L1	0.34	1.77	0.00402586	0.0102173	0.09	51.71	1.16	2.27
SLX4IP	-0.32	1.77	0.0242163	0.0491152	19.25	21.18	2.61	2.6
CCL4	2.52	1.77	5.45063e-20	3.01672e-18	738.57	3203.32	8.99	22.73
CTTN	0.53	1.77	3.67256e-05	0.000157403	0.06	5.48	0.29	1.95
KEAP1	1.47	1.77	7.4024e-16	2.22497e-14	43.65	54.89	5.51	10.06
SCRN3	1.1	1.77	1.12695e-14	2.86391e-13	6.04	26.28	2.03	4.22
C12orf52	1.15	1.77	2.06934e-11	2.97777e-10	23.04	54.52	2.32	5.52
TNFRSF9	2.59	1.76	9.87545e-37	3.78954e-34	80.06	107.96	3.77	5.52
WRB	1.16	1.76	3.10375e-14	7.33683e-13	9.51	15.93	2.03	3.25
DYRK1A	0.41	1.76	0.00217417	0.00592262	4.17	8.6	3.19	4.55
TMEM101	1.35	1.76	5.67723e-16	1.74283e-14	19.17	49.84	2.9	3.9
CTSH	1.47	1.75	2.51266e-11	3.56668e-10	19.72	51.07	4.35	9.09
KLHDC4	1.41	1.75	3.56115e-15	9.71469e-14	12	18.29	4.06	8.12
NFRKB	1.76	1.75	1.24037e-24	1.23096e-22	12.24	33.03	3.19	5.19
MARK4	-0.5	1.75	4.5287e-05	0.000189649	2.46	4.07	1.74	1.95
FBXO9	0.79	1.75	1.29781e-06	7.66566e-06	12.13	25.84	3.77	6.17
LRRIQ3	0.78	1.75	3.68318e-09	3.63955e-08	3.39	3	0.87	1.95
HCCS	1.51	1.75	1.43955e-21	9.36275e-20	26.6	29.61	2.9	4.22
SLCO4A1	1.83	1.74	1.34762e-28	2.21625e-26	14.89	42.38	2.32	5.84
TMEM63A	1.61	1.74	7.88518e-12	1.21681e-10	21.8	32.61	11.3	12.66
ANK1	0.48	1.74	0.000191074	0.000686747	0.44	2.63	0.87	1.3
TAF8	0.4	1.74	0.0117752	0.0262333	7.56	10.67	6.09	6.82
NARS2	1.25	1.74	5.5708e-19	2.75241e-17	9.48	19.77	0.87	2.92
GNLY	2.58	1.74	7.134e-22	4.83098e-20	233.11	1098.38	7.54	20.45
ACAA2	1.28	1.73	1.66331e-10	2.08584e-09	17.49	45.2	4.35	8.77
EGLN3	0.7	1.73	1.20626e-06	7.18762e-06	1.4	9.41	1.45	2.92
ATAD3B	0.76	1.73	8.65906e-07	5.32495e-06	2.97	21.64	3.77	6.49
TMEM206	0.58	1.73	4.8597e-05	0.000201749	11.46	24.84	2.32	3.57
C5orf58	0.99	1.73	1.37901e-13	2.91287e-12	1.35	8.18	0.58	2.6
TBXA2R	0.44	1.73	0.000342337	0.00114764	0	3.55	0	0.65
SMC4	1.01	1.73	4.63232e-08	3.7528e-07	7.19	23.71	6.38	8.77
KCTD18	0.39	1.73	0.00474591	0.0117956	3.54	9.26	1.45	2.6
IKZF5	1.1	1.72	3.62864e-12	6.03656e-11	8.62	12.33	3.77	6.17
ZNF280D	0.51	1.72	0.0013567	0.00390751	3.75	9.66	3.48	5.84
EVI5	0.43	1.72	0.000562582	0.00178442	0.68	12.62	0.58	1.62
NOL6	0.95	1.71	2.75588e-12	4.66554e-11	2	11.33	1.16	4.22
ATG13	1.64	1.71	2.38437e-22	1.69437e-20	8.95	17.13	3.77	8.12
CCR10	0.38	1.71	0.00176678	0.0049343	0.39	2.17	1.16	1.62
PGGT1B	0.44	1.71	0.00202454	0.00557172	9.14	25.04	3.77	5.19
ZNF592	0.87	1.71	1.51952e-07	1.09057e-06	6.39	17.29	4.06	5.19
SPON2	0.89	1.71	1.42704e-08	1.27646e-07	5.78	16.91	2.32	4.22
YTHDF1	0.41	1.71	0.00115961	0.00339708	6.6	16.87	1.74	3.9
KDM5B	2.11	1.71	6.32885e-22	4.31111e-20	18.15	32.05	7.54	14.94
VWA9	1.94	1.71	9.69488e-20	5.11961e-18	16.82	42.26	2.32	5.19
DEGS1	1.6	1.7	9.19804e-12	1.40621e-10	95.2	139.77	12.17	19.16
PELI3	0.34	1.7	0.00502611	0.0123978	0	7.19	0	1.3
SCAF4	1.98	1.7	6.94667e-20	3.79005e-18	17.87	46.07	7.83	12.01
BIK	0.58	1.7	5.01429e-06	2.59553e-05	4.11	45.31	0.29	1.95
PYGB	0.87	1.69	7.67387e-08	5.88552e-07	10.93	27.1	2.32	6.17
RAB11A	1.93	1.69	3.78762e-15	1.02837e-13	51.35	97.88	10.43	23.38
SPSB1	0.81	1.69	6.12545e-08	4.80683e-07	8.84	17.15	2.03	3.9
LANCL2	0.33	1.69	0.0083223	0.0193119	2.65	16.28	1.45	2.27
CCAR1	1.08	1.69	1.73449e-06	9.93898e-06	31.33	62.41	6.67	11.69
APIP	0.52	1.69	0.000321586	0.00108694	3.75	13.1	2.03	3.25
CDK6	1.91	1.69	4.97969e-17	1.84328e-15	14.27	30.58	6.96	15.58
TMEM140	2.07	1.69	1.37851e-26	1.78308e-24	42.5	97.28	6.38	10.06
TOR3A	2.21	1.69	8.86406e-25	8.8733e-23	39.53	52.46	6.09	8.77
TRIM4	1.44	1.69	9.04088e-16	2.68937e-14	14.77	43.59	4.93	7.14
ZNF614	-0.29	1.69	0.0149858	0.0324037	1.37	7.89	1.16	1.3
SFMBT2	0.52	1.69	0.00038796	0.00128302	3.26	15.27	2.32	4.22
ZNF268	0.68	1.69	1.81807e-07	1.2856e-06	8.52	9.78	1.74	2.92
DNPEP	1.35	1.69	2.70047e-13	5.35351e-12	25.98	52.18	4.64	7.47
PBLD	0.27	1.69	0.0210579	0.0436476	0	3.53	0	0.97
NTAN1	0.92	1.68	6.23416e-07	3.95196e-06	28.3	22.42	5.22	6.17
NUFIP1	0.54	1.68	9.99703e-06	4.86032e-05	4.42	18.77	0.87	1.95
GIPC1	1.26	1.68	3.7913e-16	1.1925e-14	2.62	11.82	1.45	6.82
MTCH2	1.95	1.68	4.09782e-18	1.71542e-16	52.83	117.61	6.67	12.34
PPM1A	1.03	1.68	6.67337e-09	6.3386e-08	6.61	11.99	6.09	8.12
TRIAP1	1.42	1.68	2.12141e-20	1.22722e-18	54.56	72	2.61	4.87
PHAX	2.15	1.68	2.64011e-25	2.71366e-23	34.49	57.47	6.38	11.69
CDKN2A	1.5	1.68	4.37649e-23	3.49876e-21	4.7	13.71	2.03	6.82
CEP95	1.17	1.68	5.95081e-11	8.01942e-10	10.06	38.99	6.09	6.49
PERP	1	1.68	2.7319e-08	2.34524e-07	25.2	36.85	4.64	7.14
IFNG	1.39	1.67	1.55983e-10	1.96249e-09	154.66	309.54	4.64	12.01
ZMAT1	0.7	1.67	2.48912e-06	1.37697e-05	5.93	17.01	2.9	3.9
COG3	0.81	1.67	1.31254e-07	9.55117e-07	7.65	19.83	2.61	5.52
NRM	0.99	1.67	7.48301e-13	1.38274e-11	4.56	37.23	0.87	3.9
PIGH	1.78	1.67	1.05816e-17	4.18608e-16	70.35	104.1	7.54	8.44
CCDC104	2.4	1.67	1.3333e-31	3.00959e-29	36.23	45.08	4.06	6.82
CD2BP2	1.87	1.67	1.77844e-17	6.89341e-16	28.28	77.26	7.25	15.26
PITHD1	1.19	1.66	3.67591e-12	6.10637e-11	21.15	69.83	2.9	8.12
S100PBP	2.13	1.66	1.17987e-28	1.99745e-26	4.94	10.32	4.06	8.12
BARD1	1.82	1.66	7.16492e-23	5.42648e-21	9.59	27.42	4.06	6.49
CTNNBL1	1.98	1.66	1.0704e-18	5.00911e-17	37.35	72.67	7.25	11.04
ACTR5	1.12	1.66	7.52728e-14	1.65055e-12	8.58	47.96	1.74	4.22
STK11	1.22	1.66	2.14363e-14	5.21724e-13	5.32	10.47	3.48	5.52
CD274	0.87	1.66	1.10062e-10	1.42301e-09	4.58	16	0.87	3.25
ACOT9	2.03	1.66	4.16124e-18	1.73566e-16	22.27	60.13	6.96	10.39
C2orf68	2.07	1.66	1.84355e-21	1.1923e-19	33.26	63.2	13.91	13.31
ADI1	1.91	1.66	4.64351e-16	1.43699e-14	26.35	54.76	8.7	13.64
PTPN4	1.74	1.66	7.92955e-15	2.05135e-13	9.96	20.08	8.99	12.99
CDCA7	1.43	1.66	2.43397e-19	1.22894e-17	8.52	23.37	2.32	5.52
PIP4K2B	1.05	1.66	3.08183e-11	4.30559e-10	8.7	16.29	2.9	3.57
CIAPIN1	1.35	1.66	2.3702e-15	6.59075e-14	26.5	48.25	4.06	7.14
PPP2R5A	1.99	1.65	2.445e-28	3.90928e-26	20.47	40.01	4.35	7.14
ATXN7L3B	0.67	1.65	0.000270943	0.00093526	31.99	58.32	6.67	10.06
MCM2	0.56	1.65	5.57518e-05	0.000227675	2.51	6.61	1.16	2.92
FAM221A	0.52	1.65	8.5226e-05	0.000331572	1.79	6.26	1.74	2.92
APEX2	0.52	1.65	0.000218733	0.000773595	9.65	23.35	1.45	3.25
GALM	1.94	1.65	5.38541e-15	1.42195e-13	110.74	272.98	12.75	22.4
RTN3	1.94	1.65	4.91782e-17	1.82626e-15	28.22	61.77	7.54	13.64
CD109	1.19	1.64	9.72828e-17	3.42483e-15	2.57	6.76	1.74	4.55
SLC38A5	2.5	1.64	8.24252e-34	2.25923e-31	23.37	30.78	3.77	5.52
XYLT1	2	1.64	2.66553e-27	3.74214e-25	2.08	9.03	4.06	5.19
ZNF548	2.02	1.64	6.71004e-37	2.83224e-34	6.47	21.41	1.45	5.84
CTBS	1.6	1.64	2.06976e-18	9.23532e-17	16.47	20.13	6.09	9.09
LAG3	1.98	1.63	2.26745e-15	6.33566e-14	136.29	264.89	11.01	21.75
RBM45	0.89	1.63	3.91201e-09	3.84915e-08	7.22	15.66	2.61	5.19
TSC1	0.53	1.63	0.000889731	0.0026799	10.51	15.99	4.93	4.87
ZMYND8	1.85	1.63	6.06062e-18	2.46537e-16	19.88	26.71	15.07	18.51
SLFN11	0.33	1.63	0.0181375	0.0382766	4.79	13.17	4.35	5.19
CAAP1	1.38	1.62	9.44103e-18	3.74776e-16	15.15	26.06	3.48	6.49
HN1L	0.87	1.62	6.88526e-11	9.1846e-10	0.87	7.06	0.87	3.25
FAHD1	2.13	1.62	2.46997e-40	1.49654e-37	15.57	35.01	1.45	5.19
SNAPC5	2.32	1.62	1.78837e-34	5.41782e-32	45.29	90.37	4.35	8.44
MYBL1	0.96	1.62	9.19504e-11	1.20288e-09	4.93	8.75	2.03	3.9
ZNF549	0.5	1.62	8.62282e-05	0.000334679	3.37	7.26	1.74	3.9
HEXB	1.89	1.61	1.00644e-20	6.03444e-19	30.06	43.92	6.38	12.01
GRAMD1B	0.76	1.61	3.69301e-09	3.64602e-08	1.11	4.39	1.16	1.95
SLC15A4	-0.48	1.61	6.81523e-05	0.000270761	2.1	7.07	1.74	2.6
TIMM21	1.52	1.61	4.34774e-18	1.8004e-16	27.26	47.87	3.19	4.87
SOAT1	1.02	1.61	2.72676e-08	2.34257e-07	19.84	17.63	6.96	7.14
TMEM18	2.32	1.61	3.27088e-43	2.68959e-40	8.54	19.39	2.9	6.17
AHCY	0.97	1.61	2.2554e-13	4.52338e-12	8.68	24.05	1.45	4.22
PARP11	1.44	1.61	3.14246e-14	7.41311e-13	12.42	24.07	5.22	8.77
SLC27A2	1.53	1.61	4.44086e-22	3.06127e-20	15.16	34	2.03	4.87
STXBP5	0.9	1.6	1.06302e-09	1.17105e-08	2.49	6.88	2.03	4.55
CCDC50	1.69	1.6	7.9715e-27	1.0548e-24	4.38	12.8	1.45	7.14
GYG1	2.14	1.6	7.92229e-29	1.4031e-26	55.92	98.96	4.64	8.12
LYRM1	1.69	1.6	9.6887e-26	1.07506e-23	11.31	29.11	3.19	8.12
SPTY2D1	1.24	1.6	1.20099e-11	1.78859e-10	6.93	15.14	6.09	12.01
PLAGL2	0.64	1.6	1.16592e-05	5.59252e-05	2.4	17.64	1.74	2.6
TRGV5	0.33	1.59	0.00590392	0.0142277	8.12	88.69	1.45	3.9
MMGT1	0.63	1.59	1.35695e-05	6.40214e-05	4.19	12.29	1.74	4.22
POLR3GL	2	1.59	1.21393e-17	4.78587e-16	135.13	208.1	12.46	17.53
INPP5K	1.86	1.59	1.30536e-15	3.78521e-14	29.89	57.95	6.96	13.31
ASUN	1.28	1.59	1.04962e-15	3.10623e-14	21.96	49.53	3.19	5.84
BEX2	1.36	1.59	1.53557e-13	3.2141e-12	75.2	153.18	4.06	4.55
TRAV5	0.91	1.59	9.06702e-10	1.01143e-08	135.35	309.7	2.03	3.57
WDR24	0.7	1.59	3.7612e-07	2.49222e-06	0.96	12.3	0.58	2.92
MED1	1.01	1.59	5.53995e-10	6.35302e-09	7.61	16.7	3.77	6.17
TMIGD2	1.81	1.59	1.12092e-30	2.34618e-28	22.64	47.43	1.45	4.22
DHRS13	0.56	1.59	4.59188e-05	0.000191876	3.76	11.41	2.03	4.87
LAMP3	1.02	1.59	2.79154e-11	3.92864e-10	15.38	29.86	2.32	4.55
DCAF13	1.91	1.59	1.04285e-16	3.64047e-15	28.76	47.63	7.54	11.69
IMPA1	0.52	1.58	2.60331e-05	0.000115222	8.9	15.29	1.74	3.57
SLC25A14	0.57	1.58	7.65911e-05	0.000300824	13.1	36.96	2.61	3.9
RBBP5	1.2	1.58	1.23435e-10	1.58592e-09	22.5	41.39	4.93	10.71
PPAPDC1B	1.19	1.58	1.95462e-07	1.37372e-06	39.88	88.93	6.09	12.01
P4HA1	0.72	1.58	7.87559e-06	3.93133e-05	11.54	30.7	3.77	6.49
CCDC6	1.34	1.58	1.16371e-15	3.40017e-14	2.9	16.93	2.03	6.82
GPN2	0.77	1.58	1.57355e-07	1.12654e-06	12.89	17.61	2.9	4.22
CLIC3	0.66	1.57	3.87964e-05	0.000164928	24.59	80.6	2.61	5.84
PRPS1	1.05	1.57	1.37058e-07	9.92962e-07	43.9	55.17	7.25	8.44
E2F6	0.68	1.57	4.98556e-08	4.00795e-07	1.26	8.77	0.29	2.27
ZNF43	1.97	1.57	1.70364e-26	2.13177e-24	6.65	14.56	3.48	7.14
CRIM1	1.23	1.57	8.82608e-14	1.9063e-12	4.17	10.77	4.35	8.44
LRSAM1	0.95	1.57	1.58893e-07	1.13614e-06	31.74	51.68	4.35	7.14
USP1	2.03	1.57	4.21303e-26	5.05213e-24	23.72	31.65	4.35	7.79
SNAP47	2.19	1.57	5.92747e-36	2.00697e-33	6.96	29.06	3.19	10.39
FBXO7	1.79	1.56	2.15755e-13	4.35749e-12	25.71	72.86	9.28	15.91
HAVCR2	1.72	1.56	2.0093e-13	4.07956e-12	67.37	146.06	6.96	15.91
HELLS	1.08	1.56	7.9575e-10	8.97226e-09	6.09	9.31	4.06	5.52
CD9	1.62	1.56	2.83785e-18	1.23281e-16	10.16	65.19	0.58	7.79
WBP1L	0.79	1.56	6.79915e-07	4.28183e-06	10.72	20.5	4.06	3.9
TPRG1	0.48	1.56	0.000223597	0.000789587	1.86	4.92	0.87	2.92
MSH2	0.9	1.56	7.35273e-08	5.65806e-07	12.41	24.31	3.48	5.84
NQO2	0.6	1.56	0.000130717	0.0004881	16.67	38.67	3.19	3.9
TCP11L1	0.56	1.56	5.69098e-06	2.92224e-05	5.03	15.65	0.87	2.92
TBX21	0.58	1.56	7.31912e-05	0.00028885	11.69	22.36	2.32	4.55
SYNE3	0.41	1.56	0.00210038	0.00574746	4.6	7.56	1.74	3.25
MON1A	0.45	1.56	0.000298205	0.00101988	9.79	14.54	1.74	1.95
RAB2B	1.71	1.56	2.2832e-25	2.36794e-23	5.47	24.02	1.45	5.84
PGAP1	1.39	1.55	1.04357e-16	3.64047e-15	6.5	9.07	3.19	7.47
TRAFD1	1.93	1.55	5.81175e-15	1.52751e-13	56.45	118.79	9.28	12.34
COG2	0.97	1.55	1.73729e-09	1.82813e-08	4.52	11.68	3.48	6.17
KIAA0947	2.1	1.55	2.81052e-31	6.22205e-29	8.47	19.1	4.93	9.42
MKI67	1.12	1.55	9.28595e-14	2.00187e-12	3.14	10.45	1.74	3.57
NT5E	-0.3	1.55	0.0109856	0.0246619	1.69	2.95	1.16	0.65
ARID5A	1.31	1.55	1.10232e-07	8.14499e-07	133.99	195.43	13.62	23.38
TMEM218	0.6	1.55	1.33031e-05	6.28677e-05	6.41	13.62	2.32	3.57
C16orf87	1.83	1.55	5.75471e-24	5.21639e-22	10.82	11.58	3.77	8.44
PPA1	1.8	1.55	3.63684e-13	7.01295e-12	36.71	85.21	6.09	15.58
CSNK2A2	0.65	1.54	1.11598e-05	5.36863e-05	8.86	14.28	3.19	4.87
PFKFB1	0.31	1.54	0.008253	0.0191859	0	2.16	0	0.97
ZDHHC12	1.96	1.54	2.72102e-17	1.03381e-15	62.42	102.68	6.96	14.94
SLC35D1	0.45	1.54	0.00582964	0.0140723	7.34	22.66	5.22	5.52
GABARAPL1	1.25	1.54	4.42689e-14	1.01925e-12	18.69	31.12	3.77	8.12
SEC61A2	0.79	1.53	1.03953e-07	7.72841e-07	8.13	16.61	3.48	3.9
SPATA2L	0.96	1.53	1.2779e-10	1.6364e-09	15.03	44.76	1.45	3.57
UNG	0.92	1.53	9.5786e-10	1.06334e-08	19.71	32.2	2.61	4.55
MED19	1.77	1.53	1.71445e-16	5.7208e-15	50.1	92.62	5.8	9.74
LIN52	1.18	1.53	1.48263e-13	3.1203e-12	17.23	26.68	2.61	4.55
WHSC1	1.47	1.53	2.46531e-14	5.95372e-13	4	9.44	5.22	9.74
EMILIN2	0.44	1.53	0.000236642	0.000830304	0.2	2.18	0.29	1.3
ATF7	0.77	1.53	5.84048e-07	3.73947e-06	2.79	6.84	4.64	8.44
MDH2	1.2	1.53	5.63524e-07	3.62014e-06	85.58	175.93	13.62	24.03
ARG2	0.73	1.53	7.99814e-09	7.50405e-08	1.11	6.36	0.29	1.95
RRP36	0.58	1.52	0.000198021	0.000708395	19.18	44.98	2.9	5.19
DIP2B	0.77	1.52	7.51189e-07	4.67696e-06	4.7	8.64	4.06	7.14
OSBPL3	0.55	1.52	0.00591575	0.0142533	14.13	13.87	7.54	11.04
LEPROT	1.22	1.52	3.04003e-11	4.25234e-10	15.29	37.94	6.38	9.09
CBX1	1.64	1.52	1.42115e-15	4.06972e-14	11.36	32.69	2.9	5.52
CNDP2	1.27	1.52	9.52392e-08	7.17535e-07	20.47	38.92	8.99	14.61
RNLS	0.35	1.52	0.00351587	0.00905475	0	6.01	0	0.97
RANBP2	1.19	1.52	5.5611e-08	4.40298e-07	13.47	21.73	13.04	14.29
WDR59	1.09	1.52	2.95817e-10	3.55475e-09	9.31	13.79	4.93	6.82
BLM	1.92	1.52	7.40295e-22	4.98379e-20	19.34	27.72	3.48	10.39
C11orf49	1.42	1.52	1.17412e-14	2.97065e-13	20.41	32.35	4.93	7.14
CDC73	1.93	1.52	2.96174e-16	9.55059e-15	25.6	58.14	6.09	11.69
NMRAL1	2.21	1.52	2.4807e-35	7.71832e-33	27.86	30.73	3.19	7.14
GNAT2	0.46	1.51	0.000160587	0.000587069	0	7.85	0	0.65
PWP1	1.81	1.51	8.3573e-17	2.96942e-15	56.76	92.57	8.12	11.36
LAT2	0.86	1.51	3.23708e-08	2.72208e-07	14.32	29.46	2.61	6.17
NEK3	-0.33	1.51	0.0102371	0.0231804	9.14	17.98	1.74	2.27
APOBEC3G	1.86	1.51	1.65021e-13	3.42911e-12	100.74	201.09	16.23	30.19
ZNF575	-0.33	1.51	0.0054719	0.0133374	1.49	12.33	1.16	0.65
AGBL3	0.71	1.51	5.05862e-07	3.27899e-06	1.9	5.39	2.9	4.22
CHDH	1.02	1.51	4.23606e-13	8.06585e-12	0.04	5.51	0.29	1.62
WARS	1.75	1.51	3.23042e-14	7.58952e-13	24.48	37.3	5.51	10.06
OTOF	0.45	1.51	0.000395301	0.00130617	0.95	10.27	0.29	2.27
TNIP3	1.14	1.51	1.30497e-10	1.6692e-09	31.17	76.52	5.22	7.79
FAM107B	1.28	1.51	2.83875e-08	2.42611e-07	35.7	40.01	14.2	20.45
NAPEPLD	-0.63	1.51	3.37728e-05	0.000145615	14.7	7.17	3.48	2.27
LIPT1	-0.29	1.51	0.014476	0.0314786	9.07	15.58	1.74	1.3
TUBA1C	1.52	1.51	3.11829e-20	1.75969e-18	6.78	13.8	6.38	17.86
AHI1	1.24	1.5	8.04642e-08	6.15894e-07	34.02	43.41	11.3	14.29
CAND1	1.46	1.5	2.60296e-11	3.67672e-10	13.91	16.18	8.7	13.31
NIPA2	1.69	1.5	2.22955e-13	4.47932e-12	39.33	87.13	7.25	12.66
GTPBP8	1.45	1.5	7.6482e-19	3.65336e-17	9.24	26.48	4.06	6.82
PIAS4	0.76	1.5	1.57527e-06	9.1266e-06	9.81	21.29	3.77	5.52
POLDIP2	1.78	1.5	1.83425e-14	4.51194e-13	56.79	95.91	7.25	11.36
CADM1	0.65	1.5	1.17828e-05	5.64243e-05	3.65	12.41	2.9	4.55
KNOP1	0.84	1.5	1.38401e-06	8.11652e-06	6	12.45	4.93	5.84
H1FX	1.51	1.5	4.18058e-18	1.73743e-16	24.71	37.34	11.59	15.58
FAM227B	-0.52	1.5	0.000123209	0.000462917	2.69	8.63	2.9	2.6
PLS3	0.32	1.5	0.0155941	0.0335299	1.12	3.98	0.58	1.62
PAFAH1B2	1.23	1.5	4.68513e-08	3.79025e-07	20.05	36.7	10.72	13.31
RHOC	1.68	1.49	6.04628e-16	1.8414e-14	14.1	37.74	7.25	13.64
SNAPC3	1.23	1.49	1.34673e-13	2.85517e-12	15.06	31.75	3.77	5.84
LSM10	1.74	1.49	1.95342e-13	3.98014e-12	141.37	278.44	10.43	20.45
ZBTB34	-0.33	1.49	0.00660828	0.0157179	3.62	0.85	0.87	0.32
PTPN11	1.7	1.49	5.8559e-14	1.30646e-12	17.45	42.87	8.12	16.23
SLC25A4	0.34	1.49	0.0131829	0.0289345	2.92	10.39	1.16	2.27
FUBP3	2.37	1.49	5.91783e-33	1.44949e-30	12.98	23.46	3.19	7.14
MFSD5	1.82	1.49	1.40559e-19	7.35504e-18	62.79	91.72	3.77	6.49
VDR	1.36	1.49	1.89176e-17	7.30802e-16	10.89	13.52	3.48	5.52
TXLNA	1.63	1.49	7.10161e-13	1.31437e-11	41.25	57.12	9.57	15.58
SLC25A53	1.07	1.49	1.24814e-11	1.847e-10	7.77	9.32	2.61	4.87
MLYCD	0.28	1.49	0.0234934	0.0478006	2.82	11.86	2.03	3.9
AIM2	1.17	1.49	3.30739e-11	4.59284e-10	49.98	70	6.09	4.87
GTPBP1	1.05	1.49	4.37108e-11	5.99047e-10	3.38	8.2	2.61	4.87
PUM2	1.12	1.48	4.87978e-07	3.172e-06	21.08	56.88	10.43	15.26
C1orf50	0.47	1.48	0.00922843	0.0211544	32.25	36.46	6.67	6.82
TRAF7	0.46	1.48	0.000482236	0.00155679	3.52	3.72	2.03	2.6
TARS	1.3	1.48	4.67943e-13	8.84559e-12	10.76	31.73	3.77	7.79
PLRG1	0.72	1.48	4.50168e-05	0.000188723	18.25	40.34	3.77	6.17
SEC22C	1.79	1.48	1.97149e-19	1.0132e-17	9.42	23.29	5.51	10.06
NKG7	1.71	1.48	2.14015e-11	3.06817e-10	253.5	565.49	8.7	14.61
NDNL2	1.92	1.48	1.20006e-28	2.00218e-26	39.67	59.4	3.19	5.19
ABHD15	-0.38	1.48	0.00511467	0.0126082	8.46	32.54	2.03	1.62
SNTB1	0.78	1.48	2.09287e-09	2.16665e-08	2.04	5.63	0.29	2.6
TACO1	0.74	1.48	3.35753e-07	2.24982e-06	11.95	59.49	1.74	3.57
KIAA1324	1.46	1.48	4.0377e-22	2.80012e-20	7.38	11.75	2.9	5.52
GSDMD	1.69	1.47	1.00556e-11	1.52517e-10	83.43	128.09	15.94	20.78
SDE2	0.76	1.47	6.83635e-09	6.46672e-08	3.99	11.89	1.74	4.87
AC132872.2	0.58	1.47	4.62009e-06	2.4012e-05	2.89	14.55	1.45	2.27
IFI35	1.68	1.47	2.8265e-12	4.77106e-11	101.32	246.66	9.57	18.51
RDX	1.5	1.47	6.58593e-18	2.66962e-16	6.78	19.86	5.22	8.77
C6orf226	1.24	1.47	8.03796e-14	1.75584e-12	55.57	78.12	3.19	3.57
OGG1	1.41	1.47	1.9836e-18	8.91998e-17	8.93	10.09	4.06	5.84
CCR2	0.96	1.47	1.13315e-10	1.46242e-09	14.46	26.47	2.32	6.82
SGK1	1.14	1.47	1.52194e-11	2.2206e-10	5.53	13.91	2.9	6.49
GPX7	0.71	1.47	1.16421e-05	5.58666e-05	36.13	56.95	3.77	5.19
KLHDC7B	0.69	1.47	7.87229e-07	4.88286e-06	16.71	41.78	1.45	2.92
PDPR	0.75	1.47	4.17002e-08	3.40704e-07	3.43	5.44	3.77	4.87
GSTM4	0.64	1.47	5.35534e-06	2.7646e-05	3.88	17.21	1.16	3.57
SKI	0.53	1.47	6.6671e-06	3.37964e-05	0.98	8.65	1.74	3.9
TBC1D8	1.03	1.47	4.00364e-10	4.68976e-09	11.7	35.88	3.19	4.22
NCS1	0.28	1.47	0.0173231	0.0367533	0	4.44	0	0.97
ADRBK2	0.41	1.46	0.00248485	0.00666134	1.95	4.8	0.87	2.27
TBCE	1.31	1.46	1.06084e-16	3.68955e-15	13	27.91	1.45	5.19
KIDINS220	0.73	1.46	3.3094e-06	1.77944e-05	5.71	15.44	5.51	5.19
PRIMPOL	0.45	1.46	0.00148309	0.00422898	4.17	10.08	1.74	3.9
CDK2AP2	1.7	1.46	3.97905e-12	6.56259e-11	169.12	318.96	15.07	25.32
PRKCB	1.63	1.46	6.62055e-19	3.22207e-17	8.44	19.42	6.09	8.44
PTPN12	0.36	1.46	0.00311496	0.00812401	1.1	8.15	0.58	1.95
POP4	1.65	1.46	6.63335e-19	3.22207e-17	21.03	21.47	4.06	7.47
FUNDC1	0.82	1.46	2.87486e-09	2.90056e-08	15.76	38.93	1.16	3.25
HERC3	0.55	1.46	0.000234487	0.000823998	7.11	8.89	3.48	3.25
ZNF568	-0.58	1.45	9.20069e-06	4.52642e-05	1.63	5.33	1.45	1.62
VWA5A	0.78	1.45	9.11331e-08	6.8976e-07	6.99	15.94	2.03	4.22
C17orf66	0.52	1.45	2.69325e-05	0.000118701	0	2.59	0	0.65
MPV17	1.36	1.45	5.39177e-08	4.28957e-07	71.31	112.41	8.99	16.23
HIST1H2BN	1.09	1.45	4.09429e-14	9.4836e-13	3.07	6.63	0.87	2.6
EPS8L2	1.83	1.44	4.70977e-23	3.66343e-21	6.49	11.43	2.9	5.84
TRANK1	1.9	1.44	3.81272e-21	2.39834e-19	13.72	21.2	7.83	11.04
SH3BP2	1.67	1.44	2.67192e-17	1.01851e-15	8.49	17.48	5.51	10.39
ANP32E	1.74	1.44	7.59575e-13	1.39684e-11	102.93	145.07	15.07	22.4
AASDHPPT	1.22	1.44	1.32532e-12	2.35086e-11	6.82	13.24	4.35	8.12
RXRB	1.22	1.44	1.03214e-12	1.87413e-11	14.18	44.42	6.09	8.44
C2orf43	0.49	1.44	0.00224764	0.00610687	11.95	18.26	2.9	3.9
PGM2L1	0.76	1.44	6.11006e-05	0.00024663	13.91	25.87	6.96	10.06
NOB1	1.54	1.44	3.08408e-18	1.33473e-16	25.13	64.16	3.48	7.47
NUPL1	1.21	1.44	6.41429e-12	1.00876e-10	8.52	10.79	5.22	6.49
MRPL15	2.05	1.44	6.94684e-32	1.59944e-29	49.57	108.53	2.61	6.17
SP1	0.66	1.44	1.94061e-06	1.10051e-05	3.32	10.55	1.45	2.92
BHLHE40	1.58	1.44	4.00173e-12	6.57174e-11	63.1	135.98	12.46	25.97
MED12	0.4	1.44	0.0171311	0.0364064	8.59	28.33	3.48	5.19
METTL22	1.05	1.43	2.991e-12	5.01931e-11	1.79	9.16	1.16	1.62
OAT	1.08	1.43	2.72693e-12	4.62333e-11	26.76	36.02	4.06	4.55
CECR1	1.03	1.43	1.88123e-10	2.3438e-09	14.3	27.05	3.77	6.82
CLCN7	1.32	1.43	8.73758e-18	3.50477e-16	6.54	12.74	3.48	6.82
NUP93	0.74	1.43	1.98565e-05	9.04585e-05	19.23	27.85	4.93	6.17
ANKRD17	0.72	1.43	0.000112955	0.000428308	9.95	9.97	7.54	7.79
RPN1	1.31	1.43	3.52679e-08	2.93993e-07	82.79	136.02	16.23	29.55
PSMD3	1.63	1.43	9.95614e-15	2.55267e-13	14.46	30.9	5.22	10.39
NCOR2	0.55	1.43	0.000419172	0.00137283	4.67	8.18	4.06	6.17
C1D	1.28	1.43	4.21216e-11	5.77954e-10	15.78	25.06	5.22	9.09
PITPNB	1.61	1.43	1.74328e-14	4.29735e-13	16.95	30.51	6.38	10.06
XRCC4	-0.37	1.43	0.00659367	0.0156896	6.92	9.96	1.74	1.95
CNP	1.28	1.43	1.22598e-09	1.33397e-08	20.19	32.69	5.51	10.39
LRRC61	1.78	1.43	4.42819e-23	3.51567e-21	12.85	36.03	3.19	5.19
S100A2	0.8	1.43	5.07014e-10	5.85431e-09	2.11	21.99	0.29	1.95
COX20	0.41	1.42	0.00115569	0.00338708	3.04	8.47	4.64	7.79
HAUS8	0.33	1.42	0.010121	0.0229493	3.14	5.59	1.16	3.57
DHX16	0.49	1.42	0.00462061	0.0115271	21.49	34.78	4.06	6.17
ID2	1.67	1.42	6.85e-12	1.07143e-10	478.83	1051.73	27.25	45.45
TMEM131	0.48	1.42	0.0016113	0.00455198	3.17	8.37	3.19	5.19
RHBDD3	1.36	1.42	4.54322e-16	1.40975e-14	26.19	37.91	2.9	5.52
MPZL3	1.35	1.42	4.58959e-14	1.0525e-12	15.13	24.7	11.3	12.99
PLK2	0.44	1.42	0.000849859	0.00256787	1.2	12.51	0.58	1.95
C17orf59	0.38	1.42	0.00492472	0.0121895	36.5	77.35	2.61	2.92
CCDC74A	0.7	1.42	9.17987e-07	5.62719e-06	1.86	4.66	0.58	1.3
FXN	1.06	1.42	9.80154e-12	1.4915e-10	22.58	22.81	3.48	4.22
WDR76	0.69	1.42	1.55055e-05	7.21211e-05	9.73	17.57	4.64	7.79
SERAC1	0.63	1.42	1.35775e-06	7.97063e-06	0.97	4.22	0.87	4.22
DNAJC1	1.18	1.42	7.35982e-08	5.65973e-07	69.62	116.41	6.67	13.31
PIGS	2.05	1.42	1.71413e-24	1.64443e-22	35.63	40.27	6.96	9.74
EIF2S2	1.66	1.41	1.5758e-13	3.28039e-12	83.36	142.42	17.39	27.27
FBXO10	0.69	1.41	6.31787e-08	4.94434e-07	0.09	4.13	0.58	3.25
LYRM2	1.55	1.41	9.96995e-14	2.13732e-12	16.89	27.29	6.67	6.49
LCMT2	0.51	1.41	4.35272e-05	0.000183078	7.9	8.72	0.58	1.3
DESI1	1.48	1.41	1.02139e-16	3.58483e-15	16.24	22.98	4.35	7.79
RNF139	0.64	1.41	0.000147094	0.000543089	36.23	37.28	5.22	5.52
MCOLN3	0.27	1.41	0.0190982	0.0400617	1.09	4.04	0.29	1.3
KDM4C	1.35	1.41	2.73738e-10	3.32412e-09	14.08	27.77	9.57	11.04
HDGFRP3	0.35	1.41	0.00434966	0.0109291	2.31	15.55	0.87	2.92
RAB7L1	1.7	1.41	2.74139e-13	5.42249e-12	54.63	88.4	9.28	12.99
HARS	1.46	1.4	3.99452e-12	6.56927e-11	19.72	33.32	8.12	10.39
ZMYM6.1	1.14	1.4	1.48287e-12	2.61021e-11	3.31	10.74	4.06	7.47
B3GNT5	0.42	1.4	0.000826819	0.00250417	0.14	4.2	0.87	1.62
URB2	-0.34	1.4	0.0056857	0.0137624	0.85	7.29	1.16	1.95
SASS6	-0.46	1.4	0.00143003	0.00409514	7.54	8.21	2.9	1.95
MAP3K3	2.01	1.4	3.60089e-32	8.45989e-30	7.39	15.94	2.32	5.19
VMA21	1.29	1.4	4.39438e-12	7.11506e-11	19.8	34.03	5.51	12.01
ZNF444	1.33	1.4	4.62407e-15	1.23796e-13	7.22	11.91	3.48	7.47
RIC8A	1.84	1.4	5.19059e-15	1.37682e-13	38.97	44.11	6.09	10.39
KIF20B	0.61	1.4	0.000624501	0.00195679	18.23	26.19	5.51	7.79
ABHD14A	0.77	1.4	2.11661e-05	9.54796e-05	21.01	48.33	6.67	9.42
NUP88	0.7	1.4	5.29746e-05	0.000217568	22.88	28.44	4.93	6.49
HIST1H1C	1.65	1.39	3.6001e-15	9.79771e-14	121.52	190.33	8.12	13.31
ZUFSP	0.47	1.39	0.0019058	0.00527648	19.53	25.15	2.32	4.22
SLC25A3	1.71	1.39	1.25185e-11	1.84998e-10	98.24	210.87	17.1	24.35
IRAK2	0.48	1.39	0.000559455	0.0017757	3.39	14.41	1.74	2.92
HDAC3	1.13	1.39	4.55888e-07	2.98192e-06	27.96	78.42	7.25	11.36
PGBD2	0.7	1.39	4.8719e-07	3.17186e-06	8.97	15.68	1.45	2.6
PHB2	1.63	1.39	1.58528e-11	2.30717e-10	108.38	183.36	10.72	16.88
IPP	0.88	1.39	1.8412e-10	2.3014e-09	9.97	15.62	1.45	2.6
ISG20L2	1.67	1.39	9.57247e-26	1.07506e-23	16.01	30.73	4.06	8.44
SMIM4	0.93	1.39	3.82727e-08	3.15387e-07	14.63	23.9	4.93	6.49
GNB1	1.29	1.39	5.69706e-11	7.70758e-10	19.74	40.41	8.99	9.09
GPR56	2.02	1.39	9.4553e-26	1.07506e-23	8.7	31.72	1.74	10.39
RARS	0.57	1.39	0.00280365	0.00740947	58.02	73.35	8.12	9.42
FAM153B	0.33	1.39	0.00587396	0.0141674	0.09	1.2	1.16	1.95
ALKBH7	0.73	1.39	0.000118482	0.000446908	68.1	97.12	6.38	8.44
TGFBR2	1.54	1.39	3.16001e-16	1.01331e-14	29.07	34.18	8.41	13.31
CCL4L2	0.32	1.39	0.00588436	0.0141859	4.5	20.25	1.16	6.17
C1GALT1C1	1.13	1.39	2.86831e-10	3.47214e-09	70.02	94.09	5.51	6.49
STXBP2	1.26	1.38	3.82868e-10	4.51595e-09	14.24	24.71	12.17	19.16
TKT	1.57	1.38	1.28666e-12	2.29644e-11	13.24	24.82	5.8	9.09
MMAB	0.46	1.38	0.00288892	0.00760167	4.93	12.24	2.03	3.9
PEX14	0.77	1.38	5.89874e-08	4.64475e-07	4.83	9.52	2.61	4.87
PRF1	1.71	1.38	1.50434e-11	2.19771e-10	168.39	304.33	10.14	21.1
ZNF846	0.52	1.38	7.97637e-05	0.000311902	1.56	12.89	0.87	2.27
FURIN	1.21	1.38	1.93067e-08	1.69276e-07	32.04	52.09	8.99	12.01
CCNG1	1.12	1.38	6.92158e-09	6.54197e-08	40.08	64.51	6.96	10.71
PEX7	0.54	1.38	1.84971e-05	8.46674e-05	3.34	20.22	0.87	1.95
HILPDA	0.84	1.38	7.21728e-10	8.1777e-09	6.21	22.95	0.58	2.27
E2F3	0.39	1.38	0.00531231	0.0130145	3.97	10.79	2.9	4.22
CLDN15	1.12	1.38	4.75639e-14	1.08642e-12	8.6	17.17	2.9	4.87
EMD	1.56	1.38	1.13701e-14	2.88309e-13	32.77	72.59	9.86	17.86
ACOT4	1.1	1.38	3.58275e-13	6.93186e-12	18.18	41.67	2.03	3.25
ARFRP1	1.64	1.38	3.27919e-13	6.37669e-12	18.58	43.65	7.54	11.36
AKAP1	0.59	1.38	2.33734e-05	0.000104343	7.08	12.43	1.16	2.27
HDDC2	1.74	1.38	1.17229e-13	2.48992e-12	23.67	46.06	6.67	11.04
VPS51	1.14	1.38	1.16851e-07	8.59e-07	37.17	39.77	11.01	9.42
WDR20	1.99	1.37	3.25504e-26	3.98639e-24	22.55	37.26	4.35	8.44
DPP4	0.67	1.37	9.66843e-05	0.000371753	13.53	26.16	4.35	7.14
KRAS	1.55	1.37	5.1815e-12	8.27438e-11	15.99	34.61	6.96	12.66
APBB3	2.25	1.37	9.06047e-39	4.74109e-36	27.02	38.31	3.48	7.79
DEAF1	0.95	1.37	2.75102e-09	2.78049e-08	12.39	22.46	4.35	6.17
ENTPD5	-0.32	1.37	0.00853838	0.0197615	0.99	3.51	1.45	1.62
BRD8	1.49	1.37	3.0786e-15	8.4383e-14	21.21	34.26	6.38	8.77
HMCES	1.61	1.37	5.48784e-13	1.02558e-11	35.76	75.88	4.64	10.39
TRMU	1.77	1.37	1.09723e-15	3.23052e-14	18.57	28.51	6.67	10.39
TXNDC11	2.18	1.37	2.68809e-25	2.73852e-23	37.17	44.2	6.67	10.06
ACADS	1.65	1.37	3.21202e-22	2.24102e-20	19.31	49.16	2.61	6.49
HSD17B8	0.53	1.37	0.00154254	0.00438679	61.63	139.97	3.19	4.87
DYNLRB1	1.14	1.37	4.80649e-07	3.1332e-06	41.76	80.15	10.72	16.56
PPAP2A	1.49	1.37	2.43116e-12	4.17101e-11	30.9	145.76	3.19	10.71
ATP6V1D	1.46	1.37	1.07443e-13	2.29478e-12	28.51	45.91	6.09	8.12
CNIH1	1.94	1.37	1.40532e-17	5.50275e-16	71.81	150.06	4.93	9.42
LSG1	1.96	1.37	1.40157e-26	1.79277e-24	22.07	43.04	4.35	8.77
METTL18	0.3	1.37	0.0229262	0.0468121	16.84	45.75	1.74	3.57
PDIA6	1.57	1.37	5.60405e-11	7.59881e-10	62.26	125.18	15.65	26.95
SLC1A5	0.57	1.36	0.00346421	0.00893168	29.46	46.69	6.38	9.42
NPEPPS	1.57	1.36	1.4872e-13	3.1242e-12	9.65	19.24	12.75	17.86
ING1	1.11	1.36	6.82879e-12	1.06957e-10	10.58	15.99	2.61	6.17
DYRK2	-0.51	1.36	0.000403085	0.00132808	4.15	7.27	2.9	2.92
TRAV12-2	1.43	1.36	2.17068e-19	1.10083e-17	114.81	250.66	2.61	4.55
PSTPIP2	0.81	1.36	2.27169e-09	2.33422e-08	4.97	6.98	1.45	1.95
EPS15L1	1.3	1.36	1.99616e-13	4.06003e-12	6.34	18.58	4.06	6.49
NOC3L	0.91	1.36	2.84444e-08	2.42917e-07	8.83	18.35	2.61	4.55
TRIT1	0.32	1.36	0.0177936	0.0376198	5.37	17.91	1.16	1.95
GAS2L1	0.57	1.36	1.2389e-05	5.87889e-05	2.33	9.38	0.87	1.3
EBAG9	1.06	1.36	1.02238e-09	1.12953e-08	14.97	18.48	3.77	5.19
CSGALNACT1	0.96	1.35	1.75697e-05	8.07113e-05	32.43	39.09	12.75	14.61
SYVN1	1.02	1.35	5.04003e-11	6.85826e-10	16.41	31.27	6.38	8.44
IPMK	0.67	1.35	1.04887e-07	7.78501e-07	2.28	8.59	0.87	1.95
CCDC61	0.3	1.35	0.0110776	0.0248443	0.09	5.92	0.29	1.3
AATF	1.34	1.35	1.23116e-09	1.33807e-08	35.01	55.76	6.67	11.04
EIF4E	1.51	1.35	1.10364e-11	1.65549e-10	8.4	13.03	10.14	13.31
PLA2G4C	-0.59	1.35	9.4955e-06	4.65158e-05	3.47	5.47	1.45	0.97
ITGA1	1.56	1.35	8.15891e-13	1.49801e-11	7.47	12.56	3.77	12.66
DHRS7	1.56	1.35	4.39995e-10	5.11638e-09	118.54	196.3	13.91	21.75
RIPK2	0.42	1.35	0.00270318	0.00717028	10.53	15.72	2.03	3.9
CCL5	1.66	1.35	8.74218e-10	9.78037e-09	980.67	2283.71	21.16	39.29
ARL6IP6	1.6	1.35	2.14694e-12	3.70972e-11	41.89	78.28	8.41	10.71
RPA3	1.64	1.35	5.23024e-14	1.1806e-12	33.63	55.3	6.96	13.96
AREL1	0.44	1.35	0.000606186	0.00190511	1.46	5.15	1.74	3.9
SPIN3	-0.33	1.34	0.00999043	0.0227023	3.18	10.74	1.74	1.62
SMARCD1	1.05	1.34	1.36618e-09	1.46849e-08	6.63	15.96	7.83	11.69
TIFA	1.96	1.34	1.33157e-29	2.55484e-27	23.46	23.19	2.61	6.49
GSTZ1	0.6	1.34	4.06005e-06	2.13812e-05	0.87	10.42	0.87	1.95
YIF1A	1.71	1.34	5.90593e-13	1.09837e-11	80.38	139.18	8.7	12.01
U2SURP	1.17	1.34	2.79937e-07	1.90576e-06	21.63	35.57	13.33	20.13
EVA1B	0.82	1.34	1.46161e-10	1.85105e-09	3.79	12.25	0.87	3.9
C1orf109	0.89	1.34	6.41599e-11	8.5785e-10	10.06	16.87	1.74	3.57
USP39	1.91	1.34	4.55933e-17	1.70967e-15	42.39	88.76	7.83	12.99
COMMD4	1.25	1.34	1.91183e-12	3.32966e-11	13.67	25.91	4.64	9.42
ZNF275	0.46	1.34	0.000201695	0.000720196	0.94	2.98	0.29	1.62
TIMM44	0.97	1.34	5.2914e-10	6.08537e-09	10.86	15.55	4.93	7.14
FANCF	1.34	1.33	3.36875e-16	1.07427e-14	13.03	17.3	2.9	3.57
CPSF2	1.05	1.33	1.25479e-07	9.17154e-07	9	20.82	3.77	4.87
CHRAC1	0.97	1.33	1.08841e-05	5.24696e-05	33.41	66.75	6.09	11.36
INSL3	0.55	1.33	1.76351e-05	8.0947e-05	16.44	56.52	1.45	2.92
PTP4A1	1.18	1.33	4.62575e-08	3.75012e-07	21.75	35.53	6.09	11.04
PGAP2	0.42	1.33	0.00106661	0.0031557	10.3	17.27	1.45	3.9
SNRNP27	0.48	1.33	0.00898223	0.0206798	28.22	34.48	9.57	11.36
MTHFD1	0.95	1.33	2.27602e-07	1.57651e-06	19.18	20.2	4.06	7.14
RBKS	0.62	1.33	1.18203e-05	5.65551e-05	3.91	9.53	3.19	5.19
IDH2	1.52	1.32	2.6398e-09	2.67277e-08	210.01	300.47	16.23	23.7
SUOX	0.63	1.32	1.03284e-06	6.24149e-06	6.1	20.76	1.16	3.9
SHMT1	0.76	1.32	3.04507e-09	3.06156e-08	7.81	5.45	1.45	2.92
OSER1	0.99	1.32	5.00492e-08	4.0179e-07	71.75	122.27	4.06	5.84
TRIM59	1.55	1.32	2.82917e-13	5.58652e-12	12.99	26.28	6.38	6.82
COMMD7	0.96	1.32	7.70256e-05	0.000302428	127.48	193.75	13.91	15.26
PCF11	1.5	1.32	6.97804e-11	9.28684e-10	17.51	33.03	10.72	15.58
FAM219A	0.33	1.32	0.00522375	0.0128331	2.2	5.37	0.87	1.95
CBR4	0.33	1.32	0.0191078	0.0400745	4.88	8.53	1.74	3.25
MTAP	0.76	1.32	1.44102e-05	6.75176e-05	5.71	10.75	4.06	8.12
NPC1	1.4	1.32	1.1125e-13	2.37168e-12	18.13	9.76	6.96	11.04
STRAP	1.52	1.32	4.00455e-10	4.68976e-09	125.14	225.12	13.62	21.1
ING4	1.16	1.32	5.04111e-10	5.82664e-09	47.78	69.47	5.51	7.14
GPR25	0.88	1.31	5.69766e-11	7.70758e-10	14.76	18.68	1.16	2.6
TRUB2	0.71	1.31	6.64794e-05	0.000264997	42.97	61.15	4.06	5.19
TMEM14C	1.58	1.31	4.30814e-12	6.9951e-11	114.86	168.97	7.83	12.01
C9orf114	1.24	1.31	4.28831e-13	8.14638e-12	12.93	25.84	4.35	8.44
ZNF16	0.26	1.31	0.0243446	0.0493406	0.01	2.88	0.58	0.97
ANKHD1	0.45	1.31	0.000453182	0.0014729	0.58	2.2	3.19	7.14
GZMA	1.54	1.31	2.16625e-09	2.23457e-08	540.68	1476.74	13.33	27.27
RBL1	2	1.31	1.10166e-21	7.28867e-20	13.99	24.75	4.64	9.09
TSACC	0.36	1.31	0.00258804	0.00690943	3.83	12.62	0.58	3.57
RPS6KC1	0.8	1.31	1.34549e-08	1.2101e-07	4.57	6.07	2.03	2.92
CSK	1.42	1.31	1.16927e-09	1.27589e-08	61.61	88.45	17.39	26.62
KLHL17	-0.48	1.3	0.000374993	0.00124264	13.91	27.45	1.74	1.3
LDLRAD4	1.5	1.3	7.91365e-11	1.04236e-09	18.36	29.42	20.58	25
SECISBP2L	1.54	1.3	4.11138e-14	9.50407e-13	22.12	38.28	6.09	9.42
FPGS	1.52	1.3	4.6419e-11	6.35405e-10	51.94	52.94	6.96	12.01
NT5DC1	0.79	1.3	3.55334e-05	0.000152578	18.92	16.4	5.22	6.82
DOCK5	0.43	1.3	0.000437255	0.00142678	0	1.2	0	2.27
MYO1E	0.77	1.3	4.14654e-08	3.39268e-07	3.25	8.84	0.87	5.19
CSTB	1.16	1.3	2.89664e-07	1.96617e-06	142.6	191.4	22.03	31.49
FAM179B	1.85	1.3	5.8742e-28	9.01651e-26	6.13	8.97	2.61	4.55
REPIN1	0.85	1.3	1.99232e-09	2.07e-08	6.4	16.16	2.32	4.87
NRBF2	1.54	1.3	1.98184e-12	3.44116e-11	74	102.86	4.93	7.79
MSTO1	0.48	1.3	0.00381084	0.00973167	9.04	13.38	4.64	8.12
BSG	1.49	1.29	1.25453e-10	1.60826e-09	102.81	198.71	21.74	40.26
PPP1CB	1.5	1.29	1.45857e-10	1.85105e-09	89.1	140.41	25.22	40.26
MFSD1	1.97	1.29	1.39793e-22	1.02503e-20	34.19	44.7	5.51	8.44
HNRNPL	1.38	1.29	9.91625e-15	2.54812e-13	24.77	42.55	61.74	63.64
GINM1	1.93	1.29	1.63538e-25	1.7272e-23	23.73	57.01	2.9	6.82
SMOX	0.62	1.29	0.000242901	0.000849674	9.01	22.02	2.32	6.17
PLA2G6	0.4	1.29	0.0016703	0.0046926	3.96	8.41	2.61	2.6
GPN3	0.73	1.29	1.10277e-08	1.00915e-07	4.88	19.4	1.45	3.57
ZNF668	0.29	1.29	0.020256	0.0422211	0.5	4.29	0.58	1.62
NT5C3B	1.03	1.29	1.44047e-10	1.83235e-09	19.39	62.84	1.74	5.19
TFDP2	0.62	1.29	8.73487e-06	4.31756e-05	4.39	8.23	2.32	2.92
SCYL2	0.64	1.29	5.70563e-05	0.00023226	7.34	7.78	3.19	5.19
LANCL1	1.15	1.29	1.10443e-11	1.65549e-10	11.8	23.01	4.35	5.52
PRAF2	1.27	1.29	1.24188e-11	1.84234e-10	51.55	56.1	4.64	9.42
RPS6KA3	1.49	1.29	2.55902e-16	8.32188e-15	10.5	22.74	5.8	11.36
GUF1	0.55	1.29	7.95447e-05	0.000311257	9.69	18.65	2.61	4.55
RAP2C	0.82	1.29	3.133e-05	0.000135693	28.87	43.03	10.14	10.39
IL7	0.42	1.29	0.000456468	0.00148233	3.58	4.32	0.58	1.3
FAM175A	0.59	1.29	1.7492e-05	8.03865e-05	3.08	6.77	1.45	3.25
AP000783.1	0.4	1.29	0.00128757	0.00373458	3.96	20.94	0.58	2.27
ANKRD28	1.41	1.29	1.43128e-14	3.58193e-13	6.38	15.75	6.09	8.77
MED7	0.6	1.29	0.000276795	0.000953747	29.36	43.59	3.48	5.52
PCED1A	0.88	1.28	2.62559e-10	3.20188e-09	23.93	38.62	2.03	4.87
CSNK2B	1.39	1.28	3.72403e-16	1.17777e-14	10.69	23.12	17.68	24.35
RRAGC	0.92	1.28	3.079e-08	2.60437e-07	6.06	19.09	2.03	4.22
CHAC2	0.63	1.28	1.06999e-06	6.45247e-06	2.64	27.18	0.58	2.92
MOB3A	0.96	1.28	4.43315e-05	0.000185918	59.86	91.95	11.59	19.16
RSRC1	0.55	1.28	0.00573054	0.0138563	24.47	30.96	12.75	12.99
CRTC3	1.43	1.28	2.55178e-10	3.11848e-09	12.06	21.81	7.83	16.88
FAM101B	1.3	1.28	1.13102e-12	2.044e-11	17.22	26.77	4.64	9.09
CXCR3	1.68	1.28	3.29504e-11	4.58122e-10	287.78	398.81	17.39	21.1
PIK3CA	0.48	1.28	0.00129123	0.00374236	4.72	8.94	3.48	4.22
PRKRIP1	0.55	1.28	0.000865202	0.00261012	18.54	16.19	5.8	6.49
CHD7	0.59	1.28	0.000591418	0.00186379	8.22	16.1	3.48	5.19
GSDMB	0.94	1.27	4.8713e-11	6.65224e-10	4.67	22.15	2.03	3.25
SIN3A	2.26	1.27	6.59037e-26	7.78095e-24	11.07	18.18	8.41	11.36
RPUSD1	0.56	1.27	0.00281531	0.00743655	27.42	36.24	4.35	5.84
PURA	0.77	1.27	3.08627e-05	0.000133719	31.9	77.4	5.22	8.77
CHCHD10	1.37	1.27	1.40852e-16	4.74589e-15	10.66	33.58	9.28	14.94
MFAP3	0.7	1.27	3.46662e-08	2.89396e-07	2.01	4.04	1.16	3.57
MED26	0.98	1.27	8.70277e-11	1.14368e-09	10.19	7.8	1.45	3.57
C9orf72	1.01	1.27	3.61037e-09	3.57374e-08	6.32	18.47	4.06	4.87
FABP5	0.64	1.27	0.000181386	0.000656229	87.72	43.9	6.67	10.39
CREG1	0.73	1.27	7.02583e-08	5.43186e-07	11.52	40.36	2.03	4.22
PLBD2	0.33	1.27	0.00983871	0.0223973	0.85	8.89	0.58	2.27
TMEM123	1.03	1.27	2.18174e-05	9.83408e-05	93	122.06	18.84	27.6
WDR83	0.51	1.26	0.00067442	0.00209609	5.78	16.09	3.77	4.55
WBP11	1.41	1.26	1.32461e-10	1.69056e-09	42.98	62.79	10.72	15.58
PMF1	0.82	1.26	6.75348e-06	3.41741e-05	17.82	21	8.99	11.04
RRM2B	0.41	1.26	0.000700092	0.00216303	1.14	4.93	1.16	2.27
TGS1	1.17	1.26	1.57467e-10	1.97684e-09	29.55	40.96	5.22	7.14
SLC26A11	0.48	1.26	0.00554861	0.0134891	34.43	28.24	4.64	4.87
DNAJB12	1.31	1.26	1.05461e-11	1.59117e-10	19.14	39.27	6.38	6.82
RGS19	1.08	1.26	4.7195e-06	2.45065e-05	119.51	194.95	12.75	23.05
NUDT16	1.12	1.26	4.71447e-14	1.07899e-12	7.54	20.53	2.32	4.22
LMO7	0.63	1.26	2.99029e-06	1.62588e-05	0.3	1.46	2.03	3.57
PDE4A	0.8	1.26	2.68461e-08	2.30981e-07	6.84	14	3.19	6.17
PSMG1	0.62	1.26	3.20533e-06	1.72913e-05	17	34.53	2.32	4.22
CD79B	1.59	1.26	1.42134e-11	2.08439e-10	105.97	150.48	9.86	14.61
MED31	1.57	1.26	7.86536e-17	2.81199e-15	45.57	48.82	6.67	10.39
UBE2V1	-0.57	1.25	4.99289e-05	0.000206459	8.71	14.12	4.06	6.82
C9orf69	0.54	1.25	8.88459e-05	0.000343681	3.91	5.21	1.16	2.92
SNX8	0.32	1.25	0.00961288	0.0219309	0.07	2.88	0.29	1.62
FAM98A	0.56	1.25	0.000104943	0.000400299	3.54	8.75	2.03	2.92
NDUFS4	1.12	1.25	2.43389e-10	2.99347e-09	44.59	123.75	5.8	8.12
MPG	1.36	1.25	4.74618e-11	6.48907e-10	45.81	71.45	7.83	13.96
SS18	1.6	1.25	2.42686e-12	4.17101e-11	31.11	48.42	8.41	14.61
CCZ1B	0.75	1.25	5.56585e-07	3.57956e-06	3.66	6.25	7.54	9.42
C2orf49	0.52	1.25	0.000820924	0.00248893	6.32	18.09	4.64	4.55
PPP1R11	1.49	1.25	1.45331e-10	1.84663e-09	98.8	142.81	11.01	17.53
TMEM167B	0.59	1.25	0.000276401	0.000952672	10.97	17.17	3.48	6.17
MAP3K5	0.98	1.25	4.68379e-10	5.42999e-09	12.19	10.68	3.77	7.14
GLA	1.25	1.25	4.09201e-16	1.27662e-14	25.74	45.46	2.32	3.25
TAGLN	-0.34	1.25	0.00470028	0.0116943	1.32	5.14	1.16	1.3
MRPL14	1.65	1.25	1.28176e-12	2.29125e-11	176.73	286.95	6.38	11.69
DTX2	0.54	1.25	0.00311973	0.00813093	21.81	27.22	5.8	9.09
FBXL4	0.57	1.25	6.25831e-05	0.00025138	4.94	6.59	3.19	2.6
HPS5	0.46	1.25	0.00393387	0.0100059	4.93	11.97	4.06	5.19
DTX3L	1.54	1.24	1.08068e-14	2.7585e-13	19.9	25.44	11.3	12.01
TYROBP	-0.53	1.24	2.54865e-05	0.000112951	3.87	70.62	0.87	1.62
SMC6	1.86	1.24	3.74152e-18	1.58939e-16	13.28	21.49	4.93	9.09
SURF2	1.5	1.24	7.40556e-19	3.56706e-17	45.01	78.25	4.06	7.14
TTC1	1.77	1.24	1.35421e-14	3.39644e-13	102.23	179.2	12.17	16.88
LIMD1	0.66	1.24	5.63702e-05	0.000229909	4.92	8.46	2.9	5.84
ELP3	0.47	1.24	0.00309798	0.00808341	14.85	15.33	4.06	4.87
TBXAS1	0.57	1.24	0.000443071	0.00144289	12.27	16.1	3.19	5.19
LRRC8C	1.43	1.24	1.70982e-10	2.14184e-09	8.5	17.32	4.93	5.84
ACTN4	0.66	1.24	0.000267221	0.000923799	13.48	19.57	7.54	12.34
TBC1D15	1	1.24	5.23663e-07	3.38865e-06	12.2	11.77	6.67	7.79
PTPRJ	0.71	1.24	0.000106906	0.000407247	15.06	33.98	7.54	8.12
SLC35A4	3.02	1.24	1.01075e-51	2.79908e-48	36.44	64.83	4.06	9.42
PIGT	1.37	1.23	1.6712e-08	1.47764e-07	105.36	211.75	6.38	12.34
LSM6	1.36	1.23	5.22107e-10	6.01652e-09	57.37	77.06	8.7	15.91
GFM1	1.46	1.23	3.0491e-17	1.15086e-15	9.82	14.63	4.64	6.49
RAF1	1.7	1.23	1.5714e-13	3.27716e-12	25.88	34.28	7.25	12.34
GSAP	0.51	1.23	0.00023309	0.000819589	2.57	6.37	2.03	2.6
CIR1	1.58	1.23	1.0228e-14	2.61654e-13	27.95	51.84	7.54	10.06
LINC00998	0.86	1.23	6.89708e-08	5.34675e-07	36.69	43.78	4.06	5.19
ATP5L	1.33	1.23	3.74543e-10	4.42683e-09	195.24	255.71	42.32	56.82
ESF1	1.35	1.23	5.27325e-11	7.15869e-10	17.58	32.92	6.38	10.06
TRBV25-1	0.3	1.23	0.0140094	0.0305737	94.16	221.29	0.58	1.95
CCDC174	1.68	1.23	6.77089e-16	2.04584e-14	41.26	55.63	8.12	10.06
C1orf216	-0.84	1.23	1.53096e-08	1.3599e-07	30.37	67.57	2.9	2.92
SERINC3	1.47	1.23	3.79766e-09	3.73983e-08	91.65	146.34	12.17	20.13
SPSB2	0.52	1.23	4.98598e-05	0.000206247	6.92	15.04	1.16	2.27
LYPLA1	0.99	1.23	3.51715e-06	1.87712e-05	31.14	43.01	9.86	10.71
NCOA5	0.84	1.23	9.48297e-08	7.14918e-07	25.12	20.64	6.67	5.84
CST7	1.53	1.23	9.56222e-11	1.24949e-09	681.31	1076.03	21.16	36.04
RAB3A	0.28	1.23	0.0172232	0.0365615	0	9.3	0	1.95
SLC30A4	0.31	1.22	0.00979014	0.0223088	0.31	5.22	0.29	1.62
BNIP3L	1.5	1.22	4.13787e-11	5.68439e-10	30.31	51.12	4.64	9.42
MTHFD2	1.4	1.22	2.91311e-11	4.08973e-10	15.32	27.87	4.93	10.39
UEVLD	0.86	1.22	3.05384e-09	3.0677e-08	6.95	10.66	2.03	4.22
TSPAN31	1.36	1.22	9.82796e-11	1.28131e-09	10.89	30.33	4.06	5.19
RRAGA	0.95	1.22	2.09099e-05	9.45464e-05	81.75	147.48	5.51	9.42
MRE11A	0.42	1.22	0.00462592	0.0115342	13.94	13.02	2.9	3.57
HMGB2	1.43	1.22	5.90815e-09	5.68644e-08	149.36	284.67	15.07	30.84
RALA	1.31	1.22	3.70262e-10	4.38074e-09	19.01	51.38	5.51	12.66
HARS2	0.83	1.22	1.69128e-05	7.80359e-05	36.84	59.53	4.64	6.49
RASSF1	1.45	1.22	1.88867e-09	1.97479e-08	82.81	147.4	12.75	18.83
AP2S1	1.35	1.22	4.0693e-10	4.76075e-09	76.3	131.55	11.88	20.45
FAM126B	1.4	1.22	2.93254e-10	3.53872e-09	6.99	12.45	4.64	6.49
METTL6	1.04	1.22	3.97654e-14	9.24806e-13	11.37	13.73	1.74	3.9
CCND1	0.37	1.22	0.00232624	0.00628483	0.29	3.92	0.29	1.62
CCR5	1.39	1.22	4.89372e-17	1.82319e-15	19.33	24.61	3.19	7.14
PPP4R1	1.12	1.22	3.54661e-14	8.28166e-13	3.79	13.56	2.32	3.57
EIF3I	1.05	1.22	2.45809e-05	0.000109299	265.58	378.74	14.78	22.4
CCDC25	0.93	1.22	2.50961e-07	1.72791e-06	27.01	35.4	5.22	6.49
ZNF506	1.49	1.22	2.34934e-21	1.49423e-19	6.01	11.13	4.35	6.49
AMDHD2	0.85	1.22	9.98194e-08	7.48613e-07	7.66	17.76	3.48	4.87
RNF111	1.67	1.21	5.33033e-21	3.26398e-19	18.82	21.47	4.64	8.44
SLC39A3	1.49	1.21	5.16102e-18	2.12952e-16	15.14	22.9	4.64	8.77
JMJD8	0.59	1.21	9.88839e-05	0.000379198	9.64	14.82	3.48	5.19
ASTN2	0.5	1.21	4.58292e-05	0.00019171	0.89	3.16	0.29	0.97
ZNF85	-0.4	1.21	0.00103098	0.00306287	4.1	5.53	1.16	1.3
METTL21A	1.34	1.21	3.02003e-12	5.06064e-11	5.96	8.34	2.61	3.25
MARCH2	1.23	1.21	1.56583e-13	3.27147e-12	41.04	36.4	9.57	8.12
HTRA2	1.16	1.21	8.17157e-12	1.25596e-10	19.17	22.75	4.35	6.49
FLT1	0.3	1.21	0.0101191	0.0229493	0.44	4.64	0.29	1.3
NEU1	1.44	1.21	2.42779e-09	2.47992e-08	50.89	95.22	8.99	12.01
WDR82	1.32	1.21	1.30404e-12	2.32333e-11	17.01	21.63	5.8	9.74
MICU3	-0.35	1.21	0.00326017	0.00844914	0.66	3.01	1.45	0.65
GLUL	1.33	1.21	2.60261e-09	2.64313e-08	18.11	37.57	6.38	11.69
C5orf15	1.55	1.21	7.89772e-19	3.7415e-17	26.44	51.24	5.51	7.14
PCNA	1.44	1.21	4.08929e-18	1.71542e-16	30.23	72.97	3.48	5.52
BTBD19	0.31	1.21	0.0137507	0.0300489	3.55	9.4	1.16	2.27
NAGK	1.4	1.21	1.49675e-09	1.5969e-08	13.47	29.55	6.96	12.34
VIPAS39	0.44	1.21	0.00286367	0.00755248	10.92	22.96	1.74	3.57
TNFRSF1B	1.49	1.21	1.52317e-09	1.62208e-08	322.43	443.86	25.8	42.53
SNX24	0.27	1.21	0.0202857	0.0422676	0.07	3.63	0.87	1.3
YIPF2	-0.7	1.21	3.89465e-07	2.57526e-06	35.86	30.93	3.77	2.92
MTERF	0.65	1.2	1.66036e-05	7.67325e-05	9.74	18.18	2.32	4.87
TIMM17A	1.3	1.2	1.21484e-08	1.10149e-07	46.4	65.25	8.41	10.39
ASAP1	0.53	1.2	0.00033753	0.0011345	6.71	9.4	3.19	4.55
LAMTOR3	1.53	1.2	1.39556e-12	2.4603e-11	31.15	41.55	5.22	8.77
SRSF4	0.96	1.2	4.37034e-05	0.000183618	95.63	118.97	12.17	22.08
CCNT1	0.69	1.2	0.000207829	0.000738435	20.29	50.25	7.83	7.79
UBAP1	1.68	1.2	1.93914e-15	5.48694e-14	39.69	65.49	5.22	7.79
XRRA1	1.46	1.2	1.86215e-13	3.8009e-12	13.32	15.35	5.22	7.79
NUP62	1.12	1.2	2.71874e-08	2.33742e-07	22.2	28.42	8.12	9.74
PON2	0.4	1.2	0.00296883	0.00778879	5.77	11.16	0.87	1.95
DAD1	1.38	1.2	5.95917e-09	5.72638e-08	637.53	1081.11	23.77	38.64
ZFP14	0.7	1.2	1.88663e-05	8.62546e-05	20.51	28.66	4.35	4.87
SH2B3	0.79	1.2	9.32237e-09	8.63532e-08	4.95	6.92	1.45	3.25
HIST1H2BC	0.77	1.2	1.08016e-08	9.90825e-08	13.26	32.59	1.74	3.57
FAM127A	1.18	1.2	5.25045e-08	4.18872e-07	131.09	145.95	6.96	12.34
IFITM10	0.28	1.2	0.0181696	0.0383303	0.88	2.04	0.58	1.95
COQ5	1.33	1.2	8.02282e-14	1.75584e-12	69.99	66.55	4.64	7.14
U2AF1L4	1.36	1.2	2.71775e-10	3.31077e-09	41.48	60.48	12.75	18.51
PRELID1	1.36	1.2	2.85022e-10	3.45387e-09	83.85	134.88	19.42	30.19
IFITM3	1.39	1.2	6.27682e-14	1.39496e-12	91.19	145.19	28.12	45.78
LSM4	1.32	1.2	4.17899e-09	4.09783e-08	54.82	105.04	13.33	18.51
SLA2	1.41	1.19	2.87174e-13	5.6512e-12	55.76	85.57	6.96	9.74
UNC13D	0.95	1.19	3.4802e-05	0.00014966	27.1	45.17	11.88	14.94
PDHA1	0.44	1.19	0.0126239	0.0279152	20.42	32.39	4.64	6.82
ABL1	0.71	1.19	3.84096e-08	3.16288e-07	2.82	4.55	1.16	2.6
LCLAT1	1.71	1.19	2.61547e-17	1.00031e-15	14.89	15.84	5.22	8.12
F2R	2.43	1.19	7.08449e-36	2.33019e-33	43.74	67.3	3.77	8.77
TAB3	-0.86	1.19	9.04764e-10	1.01025e-08	2.38	8.68	2.03	2.27
PDP1	-0.46	1.19	0.00457495	0.011432	22	19.98	4.35	3.57
NOC2L	1.48	1.19	2.56851e-11	3.64146e-10	19.06	35.9	7.83	10.06
ECE2	0.5	1.19	0.000253061	0.000880664	0.99	8.2	0.87	1.62
HDDC3	1.54	1.19	8.10357e-19	3.82329e-17	31.51	56.81	4.35	8.44
DNAJC5	-0.3	1.19	0.0234622	0.0477456	7.28	12.66	3.77	2.92
BLVRA	1.02	1.19	3.35661e-07	2.24982e-06	145.14	85.7	4.35	9.09
SCMH1	1.02	1.19	1.87642e-14	4.60583e-13	4.26	10.29	0.58	3.25
CCZ1	0.89	1.19	2.71753e-09	2.74905e-08	3.21	5.8	6.09	8.44
NMI	1.18	1.19	1.60093e-07	1.14329e-06	63.11	67.61	11.88	15.91
KDM5A	1.62	1.19	4.18603e-14	9.65722e-13	18.88	31.18	10.72	13.96
COL5A1	-0.36	1.19	0.00635776	0.0151757	0.72	2.49	1.16	1.62
PPP2R2D	1.17	1.19	2.41105e-15	6.68819e-14	5.52	13.49	3.77	4.87
SF3B4	1.34	1.19	6.07079e-09	5.81422e-08	86.1	132.79	11.01	17.21
DDX60L	1.67	1.19	2.86037e-14	6.80344e-13	16.59	37.34	9.86	16.23
RPL26	1.25	1.19	6.76244e-14	1.49136e-12	29.91	58.47	44.35	54.22
MFHAS1	0.58	1.18	1.71323e-05	7.88907e-05	3.7	6.53	2.61	3.9
PANK4	0.9	1.18	2.23411e-09	2.30046e-08	3.6	10.83	2.32	4.55
TOR1AIP2	1.33	1.18	1.02746e-09	1.13296e-08	5.85	12.88	10.72	14.29
GPALPP1	0.78	1.18	4.38858e-07	2.87871e-06	8.48	8.46	3.77	3.25
TTC32	0.53	1.18	0.000438086	0.00142868	18.47	33.81	3.48	3.57
GDI2	1.33	1.18	4.79712e-08	3.86455e-07	89.9	152.96	14.49	24.35
GPR65	1.97	1.18	1.91848e-23	1.57754e-21	33.06	79.45	6.96	10.06
TMCO4	0.81	1.18	1.11067e-08	1.01557e-07	12.2	27.6	2.61	3.9
ZNF511	1.29	1.18	2.82926e-15	7.79197e-14	11.44	19.67	3.77	7.47
PTMS	1.29	1.18	6.11674e-12	9.64602e-11	28.15	45.18	8.7	14.29
YKT6	1.05	1.18	8.98805e-11	1.17848e-09	13.38	16.06	2.9	4.55
C9orf41	0.41	1.18	0.0103955	0.023502	14.45	10.49	2.61	4.87
TVP23B	0.68	1.18	0.000102601	0.000392405	18.09	21.14	4.06	6.17
RMI1	0.62	1.18	1.29998e-06	7.67457e-06	2.5	4.94	0.87	0.97
COX7B	1.13	1.18	1.1671e-06	6.97594e-06	102.22	152.97	20.29	27.6
SUPT16H	1.28	1.18	1.8566e-07	1.31043e-06	40.95	70.25	13.62	16.88
ZNF408	-0.35	1.18	0.00694073	0.0163834	17.52	24.45	2.03	1.95
KRR1	0.89	1.18	1.70474e-06	9.77824e-06	17.93	24.53	7.54	9.74
TRIM28	1.28	1.18	3.46957e-14	8.13476e-13	22.03	35.75	5.51	5.84
TRBV6-5	1.48	1.18	7.16001e-17	2.57581e-15	268.41	565.65	5.22	7.79
UCKL1	1.42	1.18	9.31567e-18	3.7108e-16	36.65	49.38	6.09	5.84
PSMD1	1.33	1.17	8.46271e-08	6.4433e-07	59.12	89.53	9.57	15.91
APLF	0.42	1.17	0.0010756	0.0031782	1.51	11.68	0.87	1.62
ATF3	1.02	1.17	1.95459e-12	3.39897e-11	11.77	20.96	2.32	4.55
ZCCHC7	1.68	1.17	8.50241e-14	1.84331e-12	50.26	53.93	11.3	12.01
PSMA5	1.33	1.17	1.05314e-07	7.81171e-07	58.5	100.39	15.07	24.68
COA3	1.95	1.17	6.58519e-19	3.22207e-17	71.06	127.91	7.25	10.39
BTG3	1.29	1.17	1.66671e-09	1.76116e-08	37.86	77.43	7.54	12.99
MGST3	1.44	1.17	2.27501e-09	2.33422e-08	31.03	50.02	12.46	17.21
RAD51C	1.35	1.17	3.19509e-14	7.52186e-13	20.32	34.6	4.93	5.19
DPYSL2	0.53	1.17	6.42066e-05	0.000256916	3.6	7.48	2.03	4.87
PHACTR4	1.58	1.17	4.16962e-13	7.9603e-12	21.24	24.61	7.25	8.77
BIRC2	0.52	1.17	0.0116964	0.0260896	36.31	51.2	12.17	12.66
SLC35B2	1.4	1.17	5.19115e-17	1.9154e-15	28.96	47.59	2.9	6.82
CDK7	0.86	1.17	4.33029e-06	2.26696e-05	42.19	63.59	6.67	5.52
UROD	1.39	1.17	5.74353e-09	5.53301e-08	91.95	122.89	6.96	10.39
SNRPB2	1.4	1.17	2.50796e-10	3.07472e-09	88.86	133.2	12.75	22.08
CPNE2	0.45	1.17	0.000874632	0.00263649	2.12	5.42	1.45	3.25
WDR26	0.8	1.17	9.7903e-06	4.77568e-05	13.3	18.11	9.57	8.44
MUT	0.61	1.17	9.28982e-06	4.56832e-05	12.49	26.91	2.03	3.9
PANX1	1.03	1.17	2.07213e-12	3.59252e-11	9.8	18.99	1.45	3.9
IFT46	0.87	1.17	7.22028e-11	9.59814e-10	11.12	9.53	0.87	1.95
SLC25A29	0.65	1.17	3.69568e-07	2.45639e-06	1.42	3.68	0.58	1.62
CDC26	0.91	1.17	2.76179e-06	1.51327e-05	57.13	84.21	13.33	19.81
PRKAR1B	0.64	1.17	0.000202513	0.000722669	8.85	16.3	5.22	8.12
FBXO34	0.48	1.17	0.00317911	0.00826511	17.65	25.94	4.06	5.84
TMEM167A	1.38	1.17	3.24797e-09	3.24853e-08	26.71	50.5	7.25	10.06
ZNF83	1.14	1.17	7.68853e-11	1.01853e-09	20.72	25.16	5.8	6.82
CCNB1IP1	0.93	1.17	1.11768e-12	2.02626e-11	8.93	18.08	1.74	3.25
TOR2A	0.43	1.16	0.0122405	0.0271402	28.06	23.09	4.35	5.52
OCEL1	1.61	1.16	4.0015e-24	3.68522e-22	28.09	45.7	3.77	5.84
UPF1	0.57	1.16	2.40293e-05	0.000107053	4.35	7.7	2.32	2.92
CHSY1	0.54	1.16	0.000129805	0.000485011	3.86	8.77	1.74	2.6
COPB2	0.99	1.16	2.13004e-06	1.19966e-05	21.03	37.06	8.12	11.04
ALKBH2	0.36	1.16	0.00336911	0.00870796	8.19	15.59	1.16	2.6
TOP3A	0.98	1.16	7.22905e-12	1.12613e-10	7.19	12.76	1.74	3.57
PDHX	1.03	1.16	2.3733e-09	2.42857e-08	20.29	22.82	4.93	5.19
GOLIM4	0.86	1.16	1.81356e-09	1.90316e-08	3.91	8.62	1.45	5.52
TELO2	0.57	1.16	0.000151306	0.000556498	13.9	24.14	4.35	3.57
SNX9	1.33	1.16	2.06949e-09	2.14437e-08	28.91	57.35	11.3	15.26
ALG12	1.18	1.16	1.33102e-09	1.43337e-08	14.54	26.64	5.22	9.09
MPC2	0.6	1.16	0.00481633	0.0119495	34.6	62.8	10.14	13.31
ZC3H7B	1.12	1.16	4.47379e-12	7.22245e-11	6.01	6.08	3.48	4.55
ZFP1	0.29	1.16	0.0155182	0.0333979	2.85	5.42	0.87	1.3
POLR2L	0.85	1.16	5.10266e-05	0.000210469	138.92	195.83	20.29	31.49
TRAV9-2	0.6	1.16	0.000312156	0.00106098	179.39	251.9	4.35	4.55
LINGO3	0.37	1.16	0.00213586	0.00583208	0.09	2.03	0.58	0.97
ZSCAN32	0.47	1.16	0.00112518	0.00330604	13.02	13.07	2.32	4.22
UVRAG	0.42	1.16	0.0167596	0.035702	17.41	18.91	6.09	5.52
CHI3L2	0.87	1.16	1.72548e-09	1.81736e-08	17.82	35.05	1.45	3.25
TRIM5	1.3	1.16	3.00523e-09	3.02679e-08	18.7	32.39	8.7	11.04
SELT	1.33	1.15	8.9007e-08	6.75444e-07	113.1	196.79	18.55	22.73
IRF2	1.29	1.15	2.00617e-08	1.75494e-07	50.05	85.92	9.86	15.91
ARL4D	0.32	1.15	0.0062166	0.0148971	3.93	17.68	0.29	1.95
PSMD9	0.72	1.15	2.52537e-07	1.73668e-06	1.7	5.51	7.83	12.66
DNAJA1	1.33	1.15	1.18328e-07	8.68745e-07	261.57	352.77	22.61	28.57
SPIN4	0.32	1.15	0.00678181	0.0160469	0.47	0.89	0.29	0.97
HSPA1B	0.78	1.15	0.000396987	0.00131101	84.88	158.65	11.59	15.58
RBM14	1.52	1.15	2.30972e-13	4.62425e-12	53.13	49.26	6.96	8.12
RHBDD2	0.99	1.15	4.42984e-05	0.000185914	187.66	298.23	13.62	19.48
EIF3D	1.32	1.15	1.55105e-07	1.11181e-06	108.94	131.41	13.91	20.13
TESK2	-0.38	1.15	0.00287579	0.00758049	11.09	47.44	2.03	1.95
UBE2D2	0.81	1.15	0.000408352	0.00134198	145.37	176.38	26.38	32.79
RAB8B	0.99	1.15	3.85227e-06	2.03522e-05	17	29.62	5.8	12.01
PDCL3	1.23	1.15	2.89849e-08	2.46801e-07	59.87	119.94	7.25	12.66
BBS4	2.11	1.15	1.53211e-35	4.89934e-33	19.5	29.86	2.03	6.49
GGA3	1.21	1.15	1.89407e-12	3.30371e-11	11.35	31.67	3.77	7.14
SLC25A25	0.56	1.15	1.77724e-05	8.14796e-05	3.04	8.06	2.03	3.9
RBM15	0.72	1.15	8.10008e-07	5.01065e-06	11.07	10.25	2.03	3.25
CCT4	1.33	1.15	2.88621e-08	2.45937e-07	82.02	113.2	11.01	16.56
SCML4	1.47	1.15	3.45388e-10	4.09486e-09	44.59	57.16	15.07	18.18
KIF21A	0.92	1.15	1.68532e-06	9.68032e-06	17.97	20	4.93	7.47
PELO	0.99	1.15	3.26551e-13	6.36085e-12	9.37	20.29	1.45	3.9
ALS2	0.37	1.15	0.00259134	0.00691354	1.95	4.38	0.87	2.6
YWHAE	1.3	1.15	1.57837e-08	1.39878e-07	74.69	108.88	20.29	30.84
THAP6	1.9	1.15	8.58971e-24	7.43495e-22	14.82	29.89	4.35	8.12
RAD1	1.57	1.15	2.4079e-24	2.27211e-22	9.57	14.22	3.19	4.87
PDE7B	0.58	1.15	0.000470116	0.00152278	5.63	15.13	2.9	7.14
ANKS3	0.82	1.15	7.03046e-08	5.43186e-07	6.84	10.54	3.19	4.55
FAM98B	0.56	1.15	0.000152093	0.000558856	5.26	7.64	3.48	4.22
MTF1	1.4	1.14	2.20481e-21	1.4101e-19	5.5	19.54	2.03	2.92
TCEB1	1.3	1.14	5.97423e-09	5.73606e-08	42.83	56.26	19.71	24.68
DERL1	1.31	1.14	5.78039e-11	7.80115e-10	24.64	25.61	8.99	12.34
STAT5A	1.29	1.14	2.32878e-08	2.01986e-07	25.77	44.02	7.25	12.34
WWP1	1.3	1.14	9.82506e-09	9.06299e-08	20.68	43.44	9.57	12.34
COQ10B	0.88	1.14	0.000184165	0.000664818	81.16	123.52	10.72	17.21
FAM117B	1.24	1.14	5.26433e-10	6.06029e-09	6.8	12.67	2.61	2.92
KIAA0825	1.46	1.14	1.68366e-22	1.21901e-20	9.84	11.03	2.61	3.9
PAN2	0.75	1.14	2.758e-08	2.36411e-07	2.54	4.36	1.45	2.6
GNB1L	1.92	1.14	2.92367e-23	2.37023e-21	6.82	15.6	2.32	6.49
NUBP2	1.32	1.14	5.53612e-08	4.38925e-07	38.96	56.5	10.14	12.66
TRBV19	0.47	1.14	0.00855287	0.0197831	241.87	363.36	4.64	3.9
SUGP1	2.49	1.14	5.16776e-41	3.71821e-38	24.72	27.46	4.64	7.79
RUVBL2	1.33	1.14	2.15687e-11	3.08829e-10	30.62	57.82	4.64	7.79
EXT2	1.27	1.14	1.3371e-17	5.2535e-16	17.21	18.28	2.03	3.9
CYB5R3	1.34	1.13	4.06473e-08	3.3281e-07	52.2	81.39	12.75	21.75
ZNF559	0.82	1.13	1.58314e-08	1.40193e-07	22.51	10.28	2.61	2.92
EIF4B	1.37	1.13	5.34728e-09	5.18895e-08	36.4	50.94	13.33	18.83
ALKBH4	0.95	1.13	3.34872e-12	5.58702e-11	12.98	19.89	2.03	3.57
DUSP4	1.24	1.13	3.26662e-07	2.19982e-06	46.01	102.51	15.07	25.65
TXNRD2	-0.69	1.13	2.78424e-06	1.52484e-05	9.71	10.83	3.77	2.6
GBF1	0.95	1.13	7.09196e-09	6.69751e-08	16.72	30	3.48	5.52
MAP3K2	0.92	1.13	1.52506e-05	7.10215e-05	9.02	14.15	8.12	10.39
LRCH3	1.1	1.13	1.15823e-08	1.05487e-07	11.9	17.2	7.83	11.36
CLK3	1.31	1.13	3.5425e-08	2.95089e-07	22.55	44.49	8.99	15.58
METAP2	1.5	1.13	7.95188e-11	1.04619e-09	55.22	65.82	11.01	19.16
NDUFA8	0.65	1.13	0.000800127	0.00243357	54.56	84.08	4.93	8.44
RAD54L2	0.64	1.13	0.00259694	0.00692358	23.19	34.76	7.83	10.71
EDEM2	1.49	1.13	2.54629e-16	8.30393e-15	35.51	69.16	5.51	7.47
RUVBL1	1.13	1.13	2.66606e-11	3.75663e-10	15.83	24.04	5.22	7.47
TOR1A	1.4	1.13	1.39727e-09	1.49492e-08	45.62	78.34	7.54	10.39
KB-1507C5.2	0.46	1.13	0.000232276	0.000817475	0.36	3.16	0.87	1.95
NCALD	1.27	1.13	1.09892e-10	1.42301e-09	8.09	11.38	5.22	9.42
EXOSC7	1.6	1.13	2.36488e-15	6.59075e-14	38.44	42.32	7.54	9.74
SCAF8	0.62	1.13	0.000295892	0.00101288	15.7	14.52	6.67	5.19
PGD	0.64	1.13	0.000281896	0.000970739	28.73	39.11	4.35	5.52
RCE1	1.76	1.13	9.13477e-28	1.33349e-25	17.73	38.69	2.9	5.84
NOP16	1.12	1.13	3.1481e-09	3.15688e-08	40.55	41.39	4.93	7.47
RAB4B	0.74	1.13	4.40574e-05	0.00018497	11.42	21.79	8.7	12.66
PORCN	0.64	1.13	3.4452e-06	1.84385e-05	7.23	20.24	1.16	2.92
FAM63B	1.35	1.13	7.63788e-12	1.18182e-10	16.64	25.79	7.54	7.79
KAT6B	1.4	1.12	2.23788e-10	2.76421e-09	18	17.56	8.99	11.36
TXN	0.87	1.12	9.05362e-05	0.000349515	276.55	386.1	23.48	32.79
TNRC18	0.59	1.12	4.96288e-06	2.57239e-05	1.15	4.48	3.77	3.25
HIATL1	0.78	1.12	4.69408e-09	4.59509e-08	8.41	21.42	3.48	5.19
ST6GAL1	0.94	1.12	3.51218e-06	1.87533e-05	20.98	17.85	10.72	8.44
DPAGT1	0.94	1.12	2.41098e-06	1.34148e-05	34.75	37.62	4.93	6.17
PAPOLG	1.38	1.12	1.56144e-18	7.10488e-17	4.32	10.53	3.19	6.17
YIPF4	1.31	1.12	1.55455e-08	1.37873e-07	17.91	29.51	12.46	17.21
DHX38	1.87	1.12	6.62381e-26	7.78095e-24	13.49	40.7	4.64	7.47
ARF3	0.39	1.12	0.00238737	0.00643037	2.41	8.5	3.48	4.87
PGAM1	1.26	1.12	1.49373e-08	1.32992e-07	116.66	198.04	21.74	34.42
MFF	0.61	1.12	0.00574408	0.0138774	28.96	30.52	12.17	11.69
IRF4	-0.45	1.12	0.00534058	0.0130727	18.89	18.75	4.06	3.9
ABI1	1.25	1.12	2.77606e-07	1.89325e-06	78.62	128.39	13.33	22.08
ZNF431	0.44	1.12	0.00551175	0.0134232	11.35	15.17	4.64	4.22
ZNF611	0.53	1.12	0.000810859	0.00246231	8.57	6.74	6.96	5.52
COMMD8	1.42	1.12	9.64568e-11	1.25897e-09	75.93	139.07	5.8	13.31
VAMP3	0.97	1.12	2.03374e-11	2.93022e-10	14.13	24.54	1.45	4.22
ISOC1	2.1	1.12	1.06515e-30	2.27073e-28	69.67	114.31	4.64	6.82
PSMA4	1.27	1.11	1.42527e-07	1.02869e-06	90.17	160.06	14.78	23.7
C17orf58	0.39	1.11	0.00158588	0.00449008	0	8.95	0	0.65
GOLGA2	0.42	1.11	0.00662875	0.0157633	9.62	15.32	7.54	10.06
TRAT1	1.29	1.11	3.06372e-07	2.06981e-06	169.45	309.13	16.23	21.1
ETV6	1.25	1.11	1.93932e-10	2.41096e-09	11.2	23.14	9.28	10.06
CREB1	1.3	1.11	3.79977e-08	3.13795e-07	16.7	28.16	8.99	13.64
SLC44A2	0.79	1.11	0.00109868	0.00323645	84.28	77.46	15.65	18.18
ME2	0.63	1.11	6.13896e-06	3.13818e-05	17.81	29.93	3.48	5.19
IVD	0.87	1.11	3.49572e-07	2.33291e-06	15.2	15.53	4.64	5.52
HLA-DRA	1.11	1.11	7.64293e-07	4.75597e-06	141.32	224.83	6.38	10.39
DNTTIP2	1.19	1.11	5.8877e-07	3.76133e-06	46.88	63.71	10.14	12.99
SSH3	1.11	1.11	1.12852e-13	2.40139e-12	5	12.62	1.16	2.6
AREG	0.52	1.11	0.00013597	0.000505093	3.13	15.2	1.45	5.84
TADA2A	0.83	1.11	3.32727e-07	2.23345e-06	20.28	13.24	2.9	4.22
GSPT1	1.62	1.11	2.49652e-18	1.10115e-16	12.84	15.78	5.8	9.09
SLC35C1	0.93	1.11	6.91984e-08	5.35718e-07	61.32	24.43	3.19	3.57
TMEM184C	1.62	1.11	7.98945e-15	2.06221e-13	38.92	32.05	6.09	7.14
NADK2	0.62	1.11	8.55357e-07	5.26571e-06	2.08	2.73	0.87	2.27
TSPAN14	1.25	1.11	3.27271e-07	2.20076e-06	24.94	32.16	17.68	25.97
AGPS	1.06	1.11	3.12398e-10	3.7345e-09	13.82	19.45	4.35	7.14
ACTR3C	0.57	1.11	4.90407e-05	0.000203371	5.3	5.83	2.9	3.57
FAM118B	0.67	1.11	7.74945e-06	3.87708e-05	11.14	22.81	2.61	3.25
C18orf25	0.52	1.11	0.00141413	0.00405717	19.56	12.75	3.19	4.55
GINS4	0.77	1.11	1.14511e-08	1.04374e-07	2.84	7.39	1.16	1.95
ITPRIP	1.02	1.11	1.32115e-08	1.19007e-07	21.46	32.42	5.22	6.17
CACUL1	1.3	1.11	2.94416e-12	4.95515e-11	15.82	18.37	5.51	7.14
KBTBD2	1.66	1.11	1.72735e-12	3.0175e-11	49.8	85.72	7.25	13.31
DAPP1	1.02	1.1	1.01916e-08	9.38603e-08	24.77	21.28	5.22	7.79
PTCD3	1.97	1.1	2.07328e-19	1.05609e-17	19.7	26.82	7.25	9.42
GRPEL2	1.14	1.1	2.84e-13	5.59831e-12	15.33	20.58	4.64	6.17
TMEM126A	1.08	1.1	6.7132e-09	6.36593e-08	64.88	135.63	4.06	6.82
TAF15	1.3	1.1	2.99501e-09	3.01914e-08	31.33	41.41	8.41	12.01
MOSPD2	1.03	1.1	2.52942e-12	4.31388e-11	4.9	10.51	2.03	2.92
ACER3	0.81	1.1	1.24362e-08	1.12463e-07	3.94	8.06	1.45	2.92
PDCD1	1.25	1.1	6.79711e-07	4.28183e-06	308.28	523.63	16.23	26.3
C11orf68	0.47	1.1	0.00229712	0.00621783	28.74	21.41	2.61	3.25
PEF1	1.56	1.1	2.72201e-14	6.51471e-13	77.97	57.95	5.8	8.12
PSMB1	1.27	1.1	3.38734e-07	2.26715e-06	343.26	449.81	28.99	34.09
ZC3H15	0.94	1.1	3.04538e-05	0.000132196	61.73	67.98	14.2	15.91
DEF6	1.29	1.1	1.03271e-07	7.69487e-07	278.72	358.51	24.93	34.42
EP400	1.23	1.1	6.49084e-10	7.4056e-09	3.9	7.67	4.93	6.82
PIGC	0.49	1.1	0.0106479	0.0240115	28.19	37.57	5.8	6.82
SSR2	1.26	1.1	3.76258e-07	2.49222e-06	68.73	112.02	17.39	24.03
SQRDL	1.27	1.1	3.38618e-09	3.37212e-08	29.61	62.3	8.99	16.56
SAE1	0.63	1.1	0.00404502	0.0102614	75.26	77.2	13.33	13.96
CPSF3L	1.21	1.09	3.98528e-07	2.63065e-06	19.31	37.9	7.54	10.39
APBA2	1.64	1.09	1.18992e-25	1.30461e-23	11.56	18.99	2.61	3.57
CELSR1	0.4	1.09	0.00104083	0.00308854	1.4	1.32	0.58	1.62
PEX16	0.92	1.09	1.52705e-06	8.8797e-06	32.61	61.03	6.67	10.39
C21orf49	0.5	1.09	3.4354e-05	0.000147955	5.96	11.65	1.16	2.92
TERF1	0.86	1.09	1.12838e-06	6.75856e-06	11.05	16.38	6.67	7.79
MED29	1.27	1.09	9.87707e-08	7.41715e-07	42.42	70.12	5.8	9.74
CPD	0.33	1.09	0.020661	0.042941	4.19	4.4	2.9	4.87
GALNS	1.53	1.09	8.07633e-20	4.36501e-18	11.76	15.09	3.48	4.87
PDAP1	0.88	1.09	2.52412e-05	0.000112019	39.88	56.56	11.88	18.51
NBPF10	0.73	1.09	2.17584e-06	1.22187e-05	2.64	4.66	14.2	14.29
EGFL6	0.55	1.09	2.04706e-05	9.27058e-05	0	12.16	0	1.3
FAM161A	-0.37	1.09	0.00556819	0.0135252	5.98	14.93	0.58	1.95
ARL5A	0.98	1.09	5.78778e-05	0.000235022	42.53	53.63	11.01	16.23
DBT	-0.63	1.09	8.33015e-07	5.13916e-06	4.24	6	3.19	2.92
MRPL22	0.81	1.09	0.000505755	0.00162451	41.79	35.15	10.43	8.77
PNKP	1.35	1.09	2.60802e-09	2.64525e-08	44.64	73.31	8.7	12.99
DGAT1	0.32	1.09	0.00867765	0.0200476	5.7	11.92	2.03	1.3
TOB1	1.25	1.09	2.42173e-07	1.6694e-06	161.91	256.48	20.29	25
MRPL1	1.97	1.09	1.2931e-24	1.27232e-22	52.48	64.26	6.67	12.66
ATAT1	-0.3	1.09	0.0246211	0.0498309	14.17	11.7	1.74	2.6
RBM27	1.67	1.09	3.34588e-13	6.48447e-12	31.31	42.1	9.57	13.64
IQSEC1	1.2	1.09	2.03816e-09	2.11572e-08	9.86	10.79	5.8	12.01
TRDV2	0.29	1.09	0.0141928	0.0309152	43.42	111.63	0.58	0.97
IFI16	1.23	1.09	2.53685e-07	1.74146e-06	124.5	206.3	30.43	36.36
UBR4	1.34	1.09	1.63507e-09	1.73483e-08	6.08	6.28	7.83	11.36
BRE	0.6	1.09	0.00301653	0.00789233	24.11	40.41	6.09	11.36
ZRANB3	-0.39	1.09	0.0031489	0.00819751	3.78	3.73	1.74	2.27
PSMC3	1.36	1.08	4.15036e-08	3.39339e-07	165.35	283.24	11.88	21.43
SLC38A2	1.32	1.08	7.33266e-10	8.2921e-09	27.36	42.16	16.23	21.75
EXOSC4	0.91	1.08	2.33539e-11	3.33975e-10	12.76	47.91	1.45	3.57
C7orf50	1.99	1.08	2.81639e-19	1.41582e-17	26.38	38.17	6.38	11.04
KIAA0368	0.45	1.08	0.00905199	0.0207997	9.44	14.85	8.41	9.74
CLECL1	1.19	1.08	4.03546e-16	1.26584e-14	7.08	19.03	1.16	4.87
FAM73B	0.63	1.08	7.42486e-05	0.000292422	11.79	18.6	3.48	5.52
MT2A	1.22	1.08	8.54253e-08	6.49978e-07	409.72	601.1	30.14	41.56
METTL5	1.25	1.08	3.43301e-08	2.86799e-07	50.59	75.48	7.54	12.99
MAPK7	1.42	1.08	9.53272e-17	3.36628e-15	6.05	10.39	2.32	4.55
IDH3A	1.29	1.08	1.63434e-14	4.04614e-13	9.87	16.03	4.64	7.47
CRTAP	1.53	1.08	6.22096e-16	1.8896e-14	19.52	29.24	6.67	9.09
RABEP1	1.25	1.08	3.60192e-08	2.99605e-07	22.21	31.97	8.99	10.71
MRPS28	0.64	1.08	8.04464e-05	0.000314358	13.79	24.46	4.93	7.47
C6orf48	1.22	1.08	2.53027e-07	1.73901e-06	152.58	256.39	17.39	19.48
NDE1	1.19	1.08	1.28185e-08	1.15739e-07	11.64	13.05	8.99	8.77
ST3GAL1	1.26	1.08	5.50231e-08	4.36845e-07	24.38	31.18	8.7	12.01
TMEM209	0.76	1.08	4.73921e-05	0.000197338	26.48	28	7.54	10.71
RBBP4	0.64	1.08	0.00413341	0.0104534	23.98	29.33	12.17	14.94
UBQLN1	0.79	1.08	0.000191216	0.000687042	21.82	24.01	8.7	10.06
FAM213A	0.37	1.08	0.00186005	0.00516355	0	5.64	0	0.65
RAB8A	0.9	1.08	5.01123e-06	2.59511e-05	14.28	18.53	10.72	15.58
MTOR	0.91	1.08	5.25598e-08	4.19022e-07	8.38	11.81	3.77	4.55
ZMAT5	1.1	1.08	1.15931e-11	1.73325e-10	7.33	14.52	3.77	7.14
SERINC1	1.34	1.08	5.07755e-08	4.07053e-07	129.41	154.18	14.2	18.18
UQCRC2	1.22	1.07	2.98014e-07	2.0169e-06	49.07	72.04	12.17	16.23
ADC	0.49	1.07	0.00153282	0.00436237	3.58	7.85	1.16	2.6
GAPDH	1.18	1.07	3.43394e-09	3.41083e-08	1036.25	1564.05	63.19	75
SH2D2A	1.21	1.07	2.11349e-07	1.47457e-06	233.72	346.37	28.7	40.91
CARNS1	0.34	1.07	0.00292244	0.00767758	2.98	8.56	1.16	2.92
CCDC130	1.2	1.07	3.2888e-07	2.21019e-06	83.8	116.48	8.12	13.31
TMEM175	0.95	1.07	9.47019e-06	4.64172e-05	74.75	77.25	10.14	10.71
DHRS7B	0.56	1.07	0.000246443	0.000859712	16.36	37.76	2.9	3.25
ZC3H11A	1.1	1.07	8.35636e-07	5.14981e-06	13.49	22.68	11.01	13.31
N4BP2	1.11	1.07	5.64363e-12	8.97144e-11	12.89	14.76	5.22	6.17
WRAP73	0.96	1.07	2.85091e-07	1.9374e-06	15.34	25.48	4.93	7.14
SVIP	1.27	1.07	7.34205e-09	6.92233e-08	29.83	39	15.65	18.51
DDX58	1.26	1.07	4.09044e-07	2.69388e-06	61.33	90.11	14.78	16.56
PEAK1	0.47	1.07	0.000339792	0.00114077	0.14	2.02	1.45	1.95
ATP5J	1.17	1.07	1.03018e-07	7.68662e-07	117.31	177.84	23.77	35.71
TGFBR1	-0.49	1.07	0.000758028	0.00231839	9.3	9.49	2.9	3.9
PARP8	1.27	1.07	6.29254e-08	4.92787e-07	23.53	39.02	18.55	20.13
AP5M1	1.22	1.07	1.06074e-07	7.86304e-07	36.05	51.47	5.51	8.77
TMED9	1.2	1.07	1.98004e-07	1.38989e-06	89.64	108.08	10.43	12.99
FAF2	1.03	1.06	2.16154e-10	2.67854e-09	13.65	23.04	4.06	6.17
SAYSD1	1.4	1.06	1.16932e-16	4.00631e-15	21.32	42.7	3.19	5.84
PRKCSH	0.91	1.06	1.5504e-05	7.21211e-05	27.48	32.5	11.59	15.91
NDUFS1	1.23	1.06	6.79791e-10	7.72971e-09	7.59	11.42	5.51	8.12
TRMT61B	0.88	1.06	3.60894e-09	3.57374e-08	16.9	35.4	3.19	6.17
PSMD7	1.27	1.06	1.46702e-08	1.31019e-07	56.47	79.84	12.75	17.21
TNKS2	1.22	1.06	2.17532e-07	1.51313e-06	34.64	51.44	11.01	16.23
TMEM179B	1.18	1.06	1.85063e-07	1.30702e-06	109.23	183.73	9.57	19.16
REEP3	1.49	1.06	2.89136e-13	5.68009e-12	17.74	30.02	7.54	11.69
ANAPC7	1.82	1.06	1.18455e-23	1.00268e-21	20.02	25.23	6.67	7.79
RALBP1	1.15	1.06	1.74485e-08	1.53803e-07	10.06	22.88	3.77	8.12
MRPS12	1.11	1.06	2.27379e-09	2.33422e-08	45.57	51.32	4.64	6.82
LIMA1	0.81	1.06	2.59308e-06	1.42557e-05	36.89	14.68	4.06	5.84
AHSA1	1.27	1.06	1.58513e-07	1.13412e-06	72.45	164.47	11.59	17.86
MRPL19	2.15	1.06	1.30494e-37	5.77786e-35	12.31	16	2.9	6.49
ADARB2	0.5	1.06	0.000241633	0.000845753	1.35	9.48	0.87	2.6
ELK4	0.76	1.06	2.26061e-06	1.26453e-05	4.61	6.3	3.77	5.19
AP3S1	1.18	1.06	2.05128e-07	1.43465e-06	47.6	74.7	8.41	11.36
KIAA1279	0.35	1.06	0.0134525	0.0294644	8.44	21.29	1.74	2.6
B3GALTL	0.89	1.06	7.19304e-12	1.12225e-10	7.45	8.64	1.45	3.57
FICD	0.33	1.06	0.00495063	0.0122484	2.12	9.28	0.87	2.6
CREBRF	0.82	1.06	2.44983e-06	1.36112e-05	12.66	13.16	5.8	7.79
REXO4	0.66	1.06	1.26434e-06	7.49487e-06	9.05	27.67	2.61	5.52
GIGYF1	1.15	1.06	1.75667e-08	1.54726e-07	19.41	20.24	19.71	22.08
TMEM156	0.74	1.06	6.93144e-05	0.000275154	27.44	62.27	6.09	6.49
CSNK1D	1.21	1.06	2.93352e-07	1.98885e-06	19.73	32.69	12.17	16.23
PTPRM	0.48	1.06	8.29709e-05	0.000323564	0	3.26	0	1.62
ATP5G2	1.17	1.06	5.38533e-07	3.47511e-06	136.26	210.47	30.72	39.61
TMEM117	-0.6	1.05	1.19854e-05	5.71566e-05	7.37	10.16	2.03	2.6
PIKFYVE	0.84	1.05	1.35542e-06	7.96102e-06	6.16	10.2	8.41	9.09
G6PD	0.66	1.05	2.28617e-06	1.27821e-05	2.48	7.22	1.74	3.25
ABCD1	0.54	1.05	1.47303e-05	6.88488e-05	4.85	9.89	0.87	2.92
MTA2	1.17	1.05	1.9253e-09	2.00944e-08	37.57	40.79	42.32	42.21
LYRM5	1.26	1.05	1.50897e-12	2.65211e-11	26.97	41.06	4.35	7.47
OBFC1	0.98	1.05	2.2828e-05	0.000102295	132.71	174.11	9.57	10.71
NR4A2	1.16	1.05	1.2449e-06	7.39034e-06	99.87	129.79	15.94	19.16
TREX1	1.2	1.05	1.06476e-06	6.42427e-06	124.39	229.03	7.54	13.31
GBP5	1.13	1.05	2.5182e-06	1.38839e-05	103.27	128.05	32.17	34.09
CD38	0.63	1.05	1.41981e-05	6.66472e-05	3.69	9.31	2.61	1.95
ZNF691	0.34	1.05	0.0107733	0.0242468	24.92	25.82	1.45	2.92
TACC1	1.24	1.05	6.679e-08	5.19518e-07	11.58	23.69	7.54	8.44
MORF4L2	1.41	1.05	3.88437e-10	4.56761e-09	56.57	68.72	11.3	17.86
SNIP1	0.54	1.05	7.45381e-06	3.74055e-05	0.43	4.22	0.87	2.27
BABAM1	1.15	1.05	1.46798e-09	1.56767e-08	20.28	25.73	10.72	12.34
C1orf43	1.2	1.05	1.51027e-06	8.78978e-06	141.39	217.19	13.33	20.13
TES	1.25	1.05	2.29263e-07	1.5861e-06	93.21	130.23	15.94	25.97
PCBP4	0.58	1.05	0.000370948	0.00123287	9.53	24.86	2.9	7.14
SEC11C	0.78	1.04	0.00105482	0.00312402	76.45	112.97	15.07	20.78
TRBV7-3	1.52	1.04	9.70681e-14	2.08869e-12	278.71	362.76	5.22	11.69
FBXO32	1.23	1.04	4.84992e-08	3.90436e-07	19.68	29.29	7.83	9.09
SIT1	1.19	1.04	9.74808e-07	5.94385e-06	525.29	768.64	22.03	32.79
RHOF	0.88	1.04	2.93479e-08	2.49522e-07	2.87	5.29	11.01	19.48
PAFAH1B3	0.96	1.04	4.83404e-09	4.71206e-08	31.79	43.08	3.77	5.19
APOBEC3C	1.2	1.04	2.21292e-07	1.5365e-06	438.53	647.69	40	53.9
CLEC2B	1.15	1.04	8.11022e-07	5.01422e-06	69.8	107.77	13.91	21.43
TTC5	2.02	1.04	2.52841e-33	6.46824e-31	10.18	9.5	2.9	3.9
ACTR3	1.16	1.04	1.96179e-06	1.10978e-05	72.92	109.98	28.41	39.61
MAP1LC3B	1.21	1.04	7.26682e-07	4.53664e-06	99.63	128.36	17.97	24.03
RASGRP1	1.22	1.04	1.18647e-07	8.70529e-07	35.09	52.51	12.17	19.16
NVL	0.81	1.04	1.94854e-06	1.10446e-05	15.61	25.08	5.22	6.82
ENTPD1	1.17	1.04	2.13754e-07	1.48775e-06	27.09	46.05	14.49	22.4
XKR9	-0.32	1.04	0.0086532	0.0199991	3.92	10.5	1.16	1.62
DENND5A	0.94	1.04	2.43826e-12	4.17697e-11	1.32	2.31	0.87	2.27
LEO1	1.21	1.04	1.47033e-10	1.858e-09	55.02	44.46	5.22	5.84
TIMM13	0.61	1.04	0.00104096	0.00308854	55.71	91.21	5.8	7.47
RPAP2	0.89	1.04	2.35028e-05	0.00010487	7.96	9.75	6.09	11.04
GFER	0.43	1.04	0.00246168	0.00660425	6.51	16.51	3.19	6.49
TUSC2	1.2	1.04	5.9837e-08	4.702e-07	59.01	58.57	6.67	10.71
C6orf62	1.16	1.04	8.14835e-07	5.03509e-06	120.71	183.31	24.06	29.87
NDUFB5	0.56	1.04	0.0146135	0.0317117	34.21	41.68	9.28	11.69
FAM207A	0.79	1.04	2.67953e-07	1.83612e-06	15.59	32.45	4.06	7.79
ARHGEF37	0.39	1.04	0.00281416	0.00743553	4.05	9.3	1.16	1.95
APBA3	1.41	1.03	2.56303e-15	7.0927e-14	12.47	25.01	4.93	9.09
UROS	1.17	1.03	1.67093e-07	1.1896e-06	20.9	44.21	5.51	10.06
SIK1	0.68	1.03	1.08291e-06	6.51671e-06	1.8	7.84	1.16	5.19
TAF3	0.92	1.03	2.21217e-05	9.95563e-05	39.1	27.64	7.54	6.17
ATG12	2.06	1.03	1.58146e-23	1.31926e-21	19.16	28.26	8.99	13.31
PPIA	1.15	1.03	5.99228e-08	4.70553e-07	314.79	448.41	53.91	65.26
PRR14	0.48	1.03	0.0133556	0.0292689	22.97	36.01	10.43	11.36
PDRG1	0.87	1.03	1.64044e-09	1.73799e-08	52.7	64.32	2.32	3.9
TCTN3	0.93	1.03	7.19095e-07	4.49415e-06	41.56	63.32	6.09	7.14
ANXA2R	1.16	1.03	1.93208e-06	1.09621e-05	96.13	182.65	8.7	11.69
C1orf162	1.24	1.03	1.75664e-07	1.24599e-06	78.11	116.9	8.41	11.36
AIM1L	0.32	1.03	0.0191321	0.0401108	5.02	10.4	1.16	1.95
BTBD11	0.33	1.03	0.00897932	0.0206798	1.71	1.93	1.16	2.6
SETD6	-0.83	1.03	4.27335e-08	3.48652e-07	11.5	5.89	2.03	1.62
DHRS12	0.79	1.03	2.81279e-06	1.53828e-05	26.33	25.57	5.51	7.79
EMC8	1.19	1.03	6.90403e-08	5.34854e-07	25.19	32.71	6.09	7.14
PTPRN2	0.58	1.03	0.000109837	0.000417585	7.63	14.01	2.32	4.55
CCDC97	0.42	1.03	0.0165498	0.035334	28.99	24.85	6.38	6.82
UCK1	1.13	1.03	1.00831e-12	1.83375e-11	22.02	29.24	3.48	3.57
TPM4	1.13	1.03	3.74221e-06	1.98435e-05	97.15	135.31	24.64	37.34
PIK3AP1	0.5	1.03	7.72392e-05	0.00030306	0.64	7.43	0.58	2.6
SLAMF6	1.98	1.03	9.35389e-23	6.99234e-21	68.55	106.96	8.41	13.31
STAU2	1.76	1.03	1.61576e-18	7.32307e-17	10.87	26.23	6.96	10.71
FGL2	-0.56	1.02	0.000250974	0.000874193	13.04	16.49	2.61	4.22
TIMELESS	0.53	1.02	5.32583e-05	0.0002185	2.1	3.44	0.87	2.6
LY96	0.95	1.02	6.29315e-11	8.42403e-10	33.31	71.5	2.61	4.22
QSOX1	1.37	1.02	9.74626e-19	4.57955e-17	3.84	9.82	3.19	5.52
DDX49	0.9	1.02	3.30947e-08	2.77282e-07	23.04	45.87	2.9	4.87
RNF24	1.65	1.02	4.4894e-23	3.53986e-21	14.76	17.61	3.19	4.55
OASL	1.2	1.02	1.91853e-06	1.09013e-05	135.26	311.96	8.41	19.81
IL10RB	1	1.02	2.80555e-07	1.90883e-06	54.9	49.56	8.7	9.74
ISG15	1.18	1.02	1.19764e-06	7.13995e-06	2387.47	3519.86	36.23	50
RIOK3	1.22	1.02	7.15016e-08	5.51323e-07	38.08	36.71	10.14	11.69
FEM1C	0.44	1.02	0.000341612	0.00114621	0.12	2.86	2.03	3.57
ZMYM2	0.72	1.02	0.00111821	0.00328639	24.1	23.61	12.46	11.04
OXA1L	2.09	1.02	6.08906e-24	5.47635e-22	48.11	73.48	5.51	8.77
HIP1	1.02	1.02	1.37803e-13	2.91287e-12	4.31	3.9	2.03	3.25
ATP9B	0.85	1.02	7.00518e-07	4.39715e-06	11.58	13.55	7.83	10.06
KIAA1432	1.52	1.02	2.38806e-16	7.81004e-15	8.14	9.89	5.51	7.79
POLD2	2.17	1.02	2.71651e-30	5.48641e-28	50.74	51.21	4.93	8.12
EIF3G	0.57	1.02	0.0143914	0.0313065	102.11	108.41	19.71	23.7
ZFPL1	0.33	1.02	0.0161701	0.0346132	3.12	5.93	2.9	4.55
CWC22	1.66	1.02	1.11248e-16	3.84592e-15	47.37	93.5	6.67	9.74
ZNF683	-0.83	1.02	4.08489e-09	4.00898e-08	27.99	35.93	2.32	2.6
C12orf65	1.18	1.02	1.03388e-07	7.6986e-07	18.88	26.9	8.12	9.42
IGFBP4	0.66	1.02	3.81569e-06	2.02008e-05	8.83	29.53	1.16	3.25
C11orf73	0.53	1.02	0.0149279	0.0323025	51.69	55.71	8.99	12.66
TRAPPC4	1.13	1.02	9.64373e-07	5.88646e-06	41.77	62.86	9.57	15.58
MAT2A	0.96	1.02	3.44148e-06	1.84271e-05	29.65	31.92	6.38	8.44
MAP3K7	2.34	1.02	3.79076e-31	8.23382e-29	19.22	28.1	5.51	9.09
USP8	0.67	1.02	0.00292364	0.00767898	36.2	56.73	11.3	12.01
PUF60	1.18	1.02	1.8286e-06	1.04315e-05	69.22	125.4	11.3	18.51
GLRX3	1.83	1.02	2.65027e-20	1.51791e-18	43.76	61.11	5.8	10.71
TRIM13	1.22	1.02	7.23461e-08	5.57462e-07	16.81	20.52	6.38	9.74
ADAM19	1.13	1.02	2.13941e-06	1.20317e-05	66.19	110.82	26.67	37.34
PMVK	1.42	1.02	6.84762e-11	9.14499e-10	140.3	190.87	8.99	12.34
PSME1	1.12	1.02	1.49759e-07	1.07617e-06	850.76	1279.81	53.62	66.88
SEC61G	1.16	1.02	2.1699e-08	1.88813e-07	69.29	100.85	16.52	23.05
CHMP6	1.2	1.01	1.38969e-12	2.4537e-11	16.87	29.78	3.48	6.17
FUT7	0.44	1.01	0.00825131	0.0191859	14.63	21.92	3.48	4.55
PABPC1	1.11	1.01	1.5011e-07	1.07802e-06	296.36	425.15	60.58	70.45
HDLBP	1.17	1.01	1.38679e-07	1.00407e-06	12.27	15.18	9.28	14.94
POP1	0.28	1.01	0.024062	0.0488366	6.27	5.04	1.16	1.95
SLC12A7	0.78	1.01	6.07865e-09	5.81691e-08	3.16	4.34	1.45	2.92
SERP1	1.15	1.01	6.71392e-07	4.2351e-06	65.86	97.7	21.74	26.62
FAM217B	-0.49	1.01	0.000480734	0.00155321	9.93	8.01	3.48	2.6
POMP	1.1	1.01	2.48849e-06	1.37697e-05	255.28	351.85	23.77	33.12
CD3G	1.14	1.01	1.23673e-07	9.06252e-07	553.42	653.56	56.52	63.96
ZNF765	0.58	1.01	4.61838e-05	0.000192773	4.12	5.54	2.61	3.57
RANGAP1	0.73	1.01	0.00010321	0.000394212	24.65	29.28	6.38	6.49
MST4	1.12	1.01	3.8415e-12	6.37225e-11	17.82	25.12	2.9	6.82
TRAV13-1	0.9	1.01	4.1612e-06	2.18539e-05	362.93	687.01	5.22	7.14
JKAMP	1.51	1.01	1.79358e-13	3.69369e-12	53.67	67.78	4.93	8.77
RPAP3	1.16	1.01	3.12073e-08	2.63579e-07	24.51	45.75	7.25	7.79
INTS1	0.41	1.01	0.00487025	0.0120729	5.85	4.95	3.19	2.6
GSTO1	1.17	1.01	1.43369e-06	8.37802e-06	177.34	309.05	13.33	20.45
PCYT1A	1.29	1.01	1.32935e-14	3.34138e-13	9.39	17.41	4.93	9.09
HS3ST3B1	1.01	1.01	1.56544e-06	9.07417e-06	30.72	30.29	8.12	9.42
POLR2A	1.19	1.01	5.68244e-07	3.64639e-06	35.09	49.71	15.65	25.32
ZYX	1.15	1.01	1.02141e-06	6.18865e-06	109.39	131.18	20	27.6
THOC2	1.39	1.01	6.02614e-09	5.78108e-08	30.55	36.77	9.86	18.51
POLL	0.4	1.01	0.00523877	0.0128618	9.25	15.24	3.19	4.22
SLK	1.1	1.01	1.0399e-07	7.72841e-07	10.8	14.19	6.38	7.14
TM9SF3	1.22	1.01	1.12577e-12	2.03772e-11	10.83	12.47	6.09	9.09
PLP2	1.14	1.01	9.54589e-07	5.83602e-06	297.86	424.31	23.48	31.17
AK2	1.14	1	2.50048e-06	1.38082e-05	44.38	78.06	9.57	17.21
FAM105B	1.61	1	4.00942e-21	2.49494e-19	7.03	17.82	4.64	7.14
LAPTM4B	0.34	1	0.0171237	0.0363974	10.51	26.03	1.16	2.6
SDCBP	1.22	1	1.02507e-06	6.20434e-06	82.98	129.13	17.1	21.1
ARF4	1.21	1	5.64292e-07	3.62305e-06	88.97	138.03	8.99	16.56
GNB2L1	1.12	1	1.64534e-06	9.47059e-06	276.03	400.07	42.03	56.17
FOXJ3	1.14	1	9.32393e-09	8.63532e-08	12.18	15.4	6.67	7.79
CDT1	0.35	1	0.00961259	0.0219309	18.14	11.81	2.32	4.55
MRPS11	1.14	1	9.89853e-07	6.01964e-06	51.66	73.11	8.7	11.36
LRRC45	0.36	1	0.0161101	0.0344913	7.84	8.57	2.03	3.9
SPATS2L	0.95	1	1.38677e-05	6.52678e-05	19.59	17.52	9.57	13.31
RFX5	1.19	1	4.01901e-07	2.65139e-06	36.49	64.25	7.25	10.71
B9D2	0.47	1	0.00145669	0.00416218	34.49	64.18	4.64	6.17
ALG11	-0.36	1	0.00817226	0.0190135	3.22	6.52	2.32	4.55
MYCBP	0.54	1	0.00029498	0.00101055	10.85	15.76	4.93	5.52
PHRF1	1.53	1	5.98416e-23	4.59264e-21	6.2	11.81	3.19	6.49
NFYC	0.93	1	1.23856e-06	7.35725e-06	15.94	22.67	8.12	8.12
ZNF583	-0.64	1	1.09969e-06	6.60046e-06	4.94	7.11	1.16	1.62
RTP4	1.75	1	9.15095e-28	1.33349e-25	46.16	54.16	3.19	5.19
FN3KRP	0.5	1	0.00461581	0.011519	50.68	61.05	4.06	5.84
TRIM32	1.04	1	1.36828e-10	1.74437e-09	12.18	31.62	0.87	2.6
ZNF829	0.28	1	0.0167624	0.035702	0.49	2.07	0.29	1.62
DCXR	1.17	1	1.01231e-06	6.14001e-06	107.21	195.2	8.99	16.56
LIMK1	0.4	1	0.000852259	0.00257444	2.26	4.41	1.16	2.6
TTC39B	1.12	1	5.30123e-07	3.4266e-06	9.23	14.24	7.54	8.12
BRK1	1.16	1	1.74231e-06	9.97887e-06	311.41	442.91	16.52	24.03
RALY	1.19	1	7.18202e-07	4.49101e-06	172.3	272.24	21.74	30.52
SLBP	0.95	1	4.77186e-05	0.000198603	116.88	159.49	11.3	15.26
ZFP90	1.58	1	2.21223e-22	1.5917e-20	9.07	12.49	2.32	5.19
CD244	0.27	1	0.0196121	0.0409828	11.36	13.97	0.87	1.95
CD47	1.15	1	1.18688e-06	7.07948e-06	87.58	111.3	29.57	41.23
DMXL1	-0.42	1	0.01698	0.0361319	6.37	9.74	5.51	5.84
EMC4	1.15	0.99	2.97913e-06	1.62078e-05	78.64	125.5	12.46	16.56
ZNF510	0.33	0.99	0.00574164	0.0138744	4.84	8.02	1.16	1.3
MAP7D3	0.68	0.99	3.72422e-05	0.000159143	13.51	10.94	4.64	5.84
EIF2B4	1.42	0.99	8.14582e-12	1.25367e-10	41.08	53.65	7.25	10.39
MCM3AP	1.99	0.99	7.67574e-28	1.14757e-25	8.83	12.63	5.22	9.09
MAP3K12	0.75	0.99	1.06035e-08	9.74976e-08	0.07	2.28	0.58	2.27
LOH12CR1	1.1	0.99	8.3714e-08	6.39069e-07	26.2	53.56	8.7	12.01
NFKBID	1.21	0.99	1.33527e-11	1.9682e-10	65.03	58.54	6.09	5.52
UBE3A	0.73	0.99	0.000223963	0.000790636	31.06	33.43	8.12	10.39
RHEBL1	0.63	0.99	2.38621e-06	1.33027e-05	4.94	22.83	0.58	2.6
RABEPK	1.22	0.99	1.2978e-08	1.17087e-07	25.02	26.04	4.93	5.19
CALM1	0.8	0.99	3.21739e-05	0.000139034	346.01	450.68	64.06	75
CEP41	0.43	0.99	0.000619525	0.00194279	1.63	3.33	1.74	3.25
PYCRL	0.89	0.99	2.63453e-11	3.71676e-10	13.63	24.6	1.16	3.25
ARL2	1.16	0.99	1.9895e-08	1.74169e-07	42.62	53.57	8.12	12.99
GCSAM	-0.35	0.99	0.00406279	0.010302	8.2	12.31	1.74	1.62
ZMAT3	1.36	0.99	2.21651e-15	6.20839e-14	3.88	7.42	1.74	6.17
TAF10	1.09	0.99	6.55732e-08	5.10743e-07	11.27	15.48	11.59	13.64
PCNP	1.24	0.99	1.03167e-07	7.69206e-07	75.05	90.11	11.59	19.81
C19orf10	0.89	0.99	0.000196242	0.000703123	125.17	210.98	11.3	15.58
FAM160B2	0.75	0.99	9.88531e-07	6.01796e-06	4.93	7.13	4.64	5.84
RNASEH2B	1	0.98	1.34456e-05	6.3489e-05	54.25	72.62	7.83	10.71
DOK4	0.41	0.98	0.000547989	0.00174315	1.99	3.74	0.58	1.3
CYB5R1	0.49	0.98	0.0041581	0.0104997	37.4	41.72	4.06	4.87
MPST	1.58	0.98	1.07761e-21	7.17075e-20	7.48	12.15	2.9	6.49
FLII	1.4	0.98	2.61551e-09	2.6505e-08	41.48	80.4	13.33	22.08
SSSCA1	1.1	0.98	6.81267e-08	5.2901e-07	34.03	56.44	4.06	7.79
EMC9	0.8	0.98	4.69398e-06	2.4385e-05	41.7	92.43	5.8	7.14
ATF1	1.02	0.98	3.9015e-12	6.45318e-11	17.74	19.62	3.48	5.84
ANAPC1	0.73	0.98	5.33735e-06	2.75655e-05	2.48	4.12	6.67	7.79
CREM	1.13	0.98	1.17197e-06	7.00141e-06	71.6	117.7	19.42	30.84
CDKAL1	0.73	0.98	0.000114076	0.000432129	26.29	39.71	7.25	8.77
KIAA0430	1.02	0.98	5.96512e-07	3.8016e-06	8.97	19.9	8.7	8.12
FUK	0.43	0.98	0.00227902	0.00617755	6.95	14.99	1.45	3.25
DGUOK	0.63	0.98	0.0054933	0.0133867	140.95	200.92	15.94	22.4
TOP2B	1.45	0.98	9.02786e-18	3.60864e-16	11.4	19.5	5.51	8.77
FGFR1	0.64	0.98	5.47629e-07	3.52985e-06	2.02	1.67	1.74	2.27
IAH1	1.08	0.98	1.77598e-06	1.01616e-05	24.69	39.71	8.12	14.61
CTSD	1.1	0.98	5.8455e-07	3.7406e-06	71.85	123.69	21.16	32.47
MRPL49	1.08	0.98	6.24357e-07	3.95575e-06	30.77	62.83	4.93	7.79
CSTF2	0.56	0.98	0.00129873	0.00376125	57.51	51.75	5.22	4.55
ZNF143	1.06	0.98	3.39236e-06	1.81949e-05	35.29	55.39	5.51	9.09
COPS2	1.5	0.98	9.17444e-20	4.93533e-18	19.7	28.45	3.48	6.82
CNOT2	1.15	0.98	1.54118e-06	8.95614e-06	18.26	25.98	13.33	13.31
IFIT2	0.46	0.98	0.0143251	0.0311858	40.56	60.52	3.77	4.55
RPSA	1.12	0.98	1.96163e-06	1.10978e-05	252.25	349.22	37.68	42.21
PRDM1	1.09	0.98	2.75575e-06	1.51067e-05	80.23	127.31	26.09	34.42
TNFAIP8L2	0.38	0.98	0.0182406	0.0384659	68.38	94.02	3.48	4.87
ACLY	1.07	0.98	2.1748e-06	1.22187e-05	20.75	40.25	6.67	10.06
C22orf46	0.51	0.98	0.000191069	0.000686747	2.3	6.62	2.03	2.92
FKBP1A	1.06	0.98	7.61074e-06	3.81266e-05	250.61	413.99	27.54	35.39
RALB	1.48	0.97	2.4642e-18	1.09107e-16	33.36	30.43	4.35	6.82
ZNF493	0.89	0.97	3.02771e-08	2.56475e-07	5.08	22.9	2.9	4.22
PTPN18	0.93	0.97	2.71813e-05	0.000119752	32.42	34.08	8.41	9.42
SMARCA5	0.81	0.97	0.000303374	0.0010348	23.28	35.62	8.12	15.58
BTRC	0.59	0.97	5.50016e-05	0.00022493	9.28	10.74	3.19	3.9
SRI	1.09	0.97	3.19935e-06	1.72672e-05	67.63	105.11	18.26	25
GZMK	0.38	0.97	0.0100119	0.0227376	26.16	33.83	2.9	3.57
FUCA1	0.84	0.97	2.90824e-10	3.51308e-09	24.89	30.6	1.16	2.92
NUCKS1	1.08	0.97	4.48297e-08	3.64463e-07	12.42	15.31	11.01	16.56
HSPA9	1.17	0.97	1.08797e-06	6.54033e-06	66.57	81.91	13.04	17.21
BTBD1	0.71	0.97	1.20191e-05	5.72934e-05	19.02	18.06	5.8	9.09
KLHL28	0.7	0.97	0.00322472	0.00836669	42.22	50.09	9.86	11.69
TRIM56	0.42	0.97	0.00809783	0.0188633	33.26	21.73	4.35	6.17
RPL17	0.73	0.97	2.49177e-06	1.37778e-05	7.25	8.55	9.86	11.36
DCAF7	1.27	0.97	3.00804e-08	2.55185e-07	29.96	39.18	7.83	11.04
ACTR10	1.53	0.97	1.76246e-11	2.55213e-10	57.12	88.7	7.83	11.36
PTER	-0.67	0.97	4.86762e-05	0.000202005	17.78	21.47	4.35	3.57
RNF13	1.57	0.97	1.61389e-16	5.40091e-15	37.24	55.86	5.51	8.12
KLHL36	1.51	0.97	1.80242e-13	3.70526e-12	10.43	11.79	4.06	6.49
AGBL2	-0.42	0.97	0.00137575	0.00396041	3.49	23.07	1.74	0.97
TMX1	0.56	0.97	0.0108935	0.0245027	65.14	88.07	11.01	13.96
LPCAT3	0.49	0.97	0.00892617	0.0205804	30.96	60.57	4.93	9.09
TRIM21	0.74	0.97	0.00300542	0.00787149	173.69	196.71	9.28	16.56
RDH11	1.17	0.97	6.79749e-09	6.43644e-08	35.58	52.16	9.57	12.99
SAR1A	1.18	0.97	9.2291e-07	5.65436e-06	86.74	122.93	24.06	33.44
SNAP23	0.85	0.97	4.8064e-05	0.00019968	25.8	22.83	10.72	11.69
UBL5	0.76	0.97	0.000398166	0.00131451	303.06	392.65	38.26	50
ULK4	1.12	0.97	2.92443e-12	4.92914e-11	11.04	30.8	2.9	6.49
KRT16	0.42	0.97	0.000514259	0.00164815	0	5.2	0	0.65
PNP	1.4	0.97	2.98202e-14	7.06359e-13	25.75	28.88	5.51	6.17
CLPP	1.09	0.96	7.46463e-06	3.74435e-05	115.05	163.85	11.88	19.81
SLC25A39	1.11	0.96	1.36594e-05	6.44192e-05	92.83	114.34	8.99	13.96
FECH	0.74	0.96	3.32219e-08	2.78146e-07	4.08	12.24	0.87	2.27
UTP23	0.84	0.96	1.23729e-06	7.35349e-06	13.81	14.36	5.8	6.82
MEA1	0.86	0.96	0.000149956	0.000552415	179.57	222.64	10.14	13.96
SHISA5	1.1	0.96	6.16731e-06	3.14987e-05	265.57	359.61	29.86	46.75
ARF5	1.06	0.96	3.2326e-06	1.74059e-05	120.15	192.69	16.23	23.05
TSHZ2	1.14	0.96	1.963e-07	1.37877e-06	12.94	13.33	9.57	10.71
PSMD6	1.1	0.96	4.92105e-06	2.55185e-05	24.96	35.53	6.67	14.61
TMEM9B	1.13	0.96	3.70785e-06	1.96886e-05	83.77	128.05	8.7	16.23
DUS3L	1.14	0.96	3.93206e-10	4.61426e-09	27.65	52.75	5.22	7.14
TLK2	0.7	0.96	2.03586e-05	9.22709e-05	10.34	9.51	5.22	5.84
NDUFS6	1.11	0.96	1.01733e-06	6.16718e-06	129.83	152.67	13.33	20.78
GBA	-0.76	0.96	5.55415e-08	4.40051e-07	11.22	25.73	2.9	3.25
TBRG4	1.99	0.96	3.19685e-21	2.0221e-19	23.61	34.49	4.06	6.82
GSTP1	1.14	0.96	3.82036e-06	2.02017e-05	127.82	202.64	8.99	14.29
BRAF	0.57	0.96	0.000123193	0.000462917	3.43	6.43	4.93	6.17
RASSF2	1.05	0.96	8.04264e-09	7.53965e-08	13.59	18.99	7.25	11.04
MCCC1	0.8	0.96	1.23262e-08	1.11556e-07	11.32	22.01	2.61	5.19
AKTIP	0.88	0.96	0.000155957	0.000571413	59.96	64.48	6.96	8.44
SERTAD3	0.92	0.96	1.88133e-08	1.65202e-07	40.59	50.58	4.06	5.19
EIF2B2	-0.47	0.96	0.00177364	0.00495106	21.12	35.31	3.19	3.25
LONP1	0.92	0.96	1.23622e-09	1.34131e-08	15.07	11	2.32	3.9
TRMT44	-0.42	0.96	0.000819513	0.00248597	5.83	2.76	1.74	1.62
BICD1	0.81	0.96	3.43077e-07	2.29222e-06	4.41	5.75	3.48	5.19
UBA3	0.83	0.96	0.000549743	0.00174776	80.18	79.89	14.49	16.56
IMMP1L	0.49	0.96	0.00267205	0.00709752	15.45	23.91	4.64	6.82
MOCS2	1.15	0.96	8.29138e-14	1.80095e-12	10.02	17.57	2.32	5.84
RECQL	1.37	0.96	1.09244e-14	2.78235e-13	25.77	30.16	6.38	11.36
TPI1	1.1	0.96	7.87838e-06	3.93133e-05	540.28	903.07	31.3	47.08
TMEM55A	0.53	0.96	0.000260848	0.000905494	14.79	14.2	1.74	3.25
PPIE	1	0.96	2.23446e-05	0.000100402	21.79	33.41	12.17	15.91
UXT	0.75	0.96	0.000991143	0.00295827	195.78	202.78	14.49	21.43
CS	1.12	0.96	1.09693e-06	6.58993e-06	27.63	46.67	8.41	16.56
SUMO1	1.09	0.96	6.29874e-06	3.20846e-05	178.7	293.61	15.36	27.6
RUNX2	1.33	0.96	6.67094e-12	1.04769e-10	14.13	18.37	7.54	11.36
SPHK2	0.69	0.96	2.41012e-06	1.34148e-05	4.18	4.77	2.03	3.57
PAPD4	0.44	0.96	0.01961	0.0409828	24.44	28.6	8.12	8.77
SCO2	0.61	0.95	0.000405495	0.00133453	27.78	31.79	5.8	7.79
CISD3	1.08	0.95	2.45896e-06	1.36357e-05	61.19	77.82	10.43	16.56
GK	1.06	0.95	1.42951e-06	8.35782e-06	37.58	48.48	9.57	13.31
EDEM1	1.18	0.95	5.52021e-08	4.37964e-07	21.03	33.22	9.57	11.36
ZNF569	0.51	0.95	6.22158e-05	0.000250167	9.63	12.83	1.74	3.25
CLNS1A	1.17	0.95	1.50028e-06	8.73608e-06	53.41	83.99	10.14	13.31
UBL4A	0.95	0.95	1.29564e-07	9.43708e-07	41.75	51.91	4.35	5.19
SOCS2	0.56	0.95	0.000506132	0.00162527	8.63	14.34	2.61	4.55
NDUFB2	1.07	0.95	1.04539e-06	6.31071e-06	78.47	111.32	30.43	41.56
NIP7	1.62	0.95	4.41964e-21	2.73543e-19	45.72	34.73	3.77	6.17
PIM1	1.09	0.95	1.19139e-05	5.68859e-05	207.85	250.52	20.87	27.6
TTC22	0.96	0.95	1.82478e-11	2.63575e-10	5.99	13.09	2.9	6.17
MCM3	1.03	0.95	1.91515e-07	1.34763e-06	57.29	70.38	6.67	10.71
SNN	0.8	0.95	5.35542e-10	6.15285e-09	5.26	9.35	0.87	2.27
HIPK2	0.81	0.95	2.73977e-05	0.000120428	1.84	5.97	2.03	3.9
SNRPB	1.07	0.95	6.95162e-06	3.50996e-05	187.69	247.84	19.13	25.65
RBPJ	1.13	0.95	5.05257e-06	2.61141e-05	60.2	77.72	16.52	24.68
GTF3C1	1.11	0.95	6.32695e-09	6.03945e-08	15.44	14.78	6.96	9.09
VAPA	1.08	0.95	1.04624e-05	5.06407e-05	29.32	46.33	12.17	21.43
C10orf54	1.12	0.95	1.31511e-05	6.22258e-05	113.2	146.51	18.55	22.73
ABCA7	0.71	0.95	9.50138e-06	4.65248e-05	14.6	20.36	4.93	5.19
MSMO1	1.25	0.95	1.15515e-12	2.08107e-11	45.56	50.01	4.35	7.47
CEACAM21	1.05	0.95	4.03067e-12	6.60984e-11	39.11	26.58	3.48	4.87
LAP3	0.79	0.95	0.000792454	0.00241151	74.35	97.16	11.3	18.18
ABHD3	1.18	0.95	1.24542e-06	7.39034e-06	78.28	89.36	11.3	15.26
PFDN1	1.42	0.95	1.5646e-10	1.96634e-09	69.08	97.38	7.54	13.96
KDELR2	0.77	0.95	0.00130069	0.00376599	59.53	80.27	10.43	15.26
DYM	0.64	0.95	0.000547134	0.00174091	18.09	30.91	7.83	7.47
NHLRC3	1.03	0.95	2.99133e-06	1.62588e-05	18.66	27.31	4.93	10.06
SMAP2	0.69	0.95	0.00491834	0.0121816	126.06	171.57	16.81	22.4
ROMO1	1.07	0.95	7.26017e-07	4.53495e-06	302.97	491.81	25.22	36.36
TRAV8-6	0.83	0.95	1.66913e-06	9.59791e-06	134.68	210.25	4.35	5.84
ZFAND2A	1.34	0.95	1.01941e-20	6.08056e-19	19.72	37.72	2.32	4.87
SNRNP25	0.59	0.95	0.000342282	0.00114764	31.38	13.87	3.48	2.92
GRAMD3	0.96	0.95	1.94094e-11	2.80001e-10	3.53	8.87	2.03	4.55
RAD50	1.28	0.94	1.32585e-08	1.19337e-07	33.71	43.3	11.88	13.31
DTNBP1	1.14	0.94	4.62505e-07	3.02177e-06	41.88	60.08	7.83	11.36
SFI1	1.07	0.94	6.6335e-06	3.36557e-05	18.41	28.81	13.62	14.61
PPP1R7	1.09	0.94	3.10934e-06	1.6805e-05	58.99	77.88	11.3	13.96
NARG2	0.71	0.94	0.000129326	0.00048369	9.95	5.57	5.8	9.09
NDUFB10	1.05	0.94	1.44261e-05	6.75644e-05	355.05	512.67	18.55	27.27
DCAF12	1.07	0.94	2.0836e-07	1.4546e-06	23.84	28.57	4.35	7.14
NXPE3	1.12	0.94	2.50461e-13	4.99707e-12	6.39	9.46	2.9	4.87
IL21	1.04	0.94	5.00813e-15	1.33149e-13	18.6	32.79	1.16	4.22
KPNA4	1.07	0.94	1.06769e-10	1.38728e-09	9.34	12.42	5.22	6.17
NDUFA10	1.06	0.94	2.71412e-07	1.85394e-06	21.75	31.03	8.41	10.06
BLCAP	1.76	0.94	7.85057e-19	3.73453e-17	32.96	61.93	6.38	12.34
LATS1	0.63	0.94	0.000750422	0.0022994	18.54	19.45	7.54	5.84
TMEM109	1.15	0.94	4.53884e-06	2.36003e-05	131.41	170.96	7.83	13.31
MYO1G	1.08	0.94	1.20887e-05	5.75063e-05	54.69	81.89	15.94	23.05
ATL3	0.69	0.94	1.59829e-05	7.4102e-05	9.83	12.79	5.8	5.52
DDX52	1.17	0.94	4.26626e-12	6.95654e-11	9.33	9.61	3.48	7.79
HSP90B1	0.71	0.94	0.00308103	0.0080428	153.5	184.54	24.64	34.09
S1PR4	1.11	0.94	4.12842e-06	2.17214e-05	161.79	225.08	11.88	15.91
NBPF1	1.08	0.94	5.14275e-12	8.23413e-11	5.67	4.53	15.07	14.94
SLC52A2	1.12	0.94	6.44575e-07	4.07488e-06	44.53	71.14	7.25	11.04
MX1	1.04	0.94	2.04298e-05	9.25574e-05	84.19	158.67	21.74	33.77
HMGN2	1.08	0.94	1.29252e-06	7.63832e-06	269.44	381.43	37.97	45.78
REPS1	0.69	0.93	9.10302e-06	4.4822e-05	7.95	7.65	4.35	6.17
MCAT	0.35	0.93	0.00462105	0.0115271	3.6	5.69	0.87	1.62
SREK1	1.01	0.93	8.60015e-06	4.26011e-05	11.72	13.21	10.14	14.94
SLC39A7	0.76	0.93	2.28158e-08	1.9838e-07	14.75	27.09	2.03	1.95
NCAPG2	0.56	0.93	0.000229563	0.000808423	3.95	5.39	2.61	4.22
APOA1BP	1.01	0.93	2.23391e-05	0.000100402	148.22	178.65	9.28	12.99
GBAS	0.78	0.93	8.72771e-05	0.000338522	24.05	46.91	9.86	12.34
ELF1	1.08	0.93	7.50124e-06	3.76e-05	102.69	139.03	22.03	29.22
LONP2	1.09	0.93	2.20952e-06	1.23897e-05	24.9	23.82	11.01	16.56
KIAA0226	1.17	0.93	6.3142e-07	3.9983e-06	29.47	30.2	12.17	12.66
QKI	0.29	0.93	0.0220099	0.0452606	1.43	2.33	1.45	3.9
RETSAT	0.58	0.93	4.46259e-06	2.32564e-05	4.92	8.98	1.74	2.6
IFITM1	1.01	0.93	7.74408e-09	7.28348e-08	1413.03	1904.65	72.17	83.12
SMG9	1	0.93	2.79675e-07	1.9051e-06	11.85	17.72	4.06	6.82
FLNA	0.65	0.93	0.00615111	0.0147586	58.44	61.31	26.67	33.12
THOP1	1.26	0.93	1.1647e-16	4.0024e-15	8.16	14.03	2.32	5.52
SUB1	1.05	0.93	1.8805e-06	1.07132e-05	67.26	100.06	37.39	48.05
RSPH3	0.32	0.93	0.0133257	0.029209	1.02	3.99	1.16	2.27
GPR108	0.66	0.93	0.00808661	0.0188409	135.56	160.56	13.04	18.18
TRIM38	1.07	0.93	6.99411e-06	3.52832e-05	45.15	77.67	12.17	13.96
ACADVL	1.03	0.93	6.63283e-05	0.000264486	218.71	277.42	25.8	32.47
MRPS33	1.06	0.93	6.11199e-07	3.88093e-06	47.04	53.32	6.09	9.09
IQCE	0.35	0.93	0.00621805	0.0148974	0.52	1.46	0.87	1.62
STT3A	1.43	0.93	2.08477e-11	2.99623e-10	28.79	29.22	10.72	13.31
HLA-DRB5	0.99	0.93	6.16344e-07	3.91144e-06	58.33	63.98	16.52	21.1
NCOA1	1.09	0.93	6.80177e-10	7.72971e-09	10.5	16.3	5.51	6.49
LYPLAL1	0.4	0.93	0.00450359	0.0112756	6.89	7.07	2.03	2.27
MRPS21	0.73	0.93	0.00194428	0.00536237	348.22	395.55	22.61	30.19
METTL9	1.05	0.93	3.3019e-05	0.000142525	45.25	63.77	9.28	15.91
TUBGCP4	0.66	0.93	1.20782e-05	5.74802e-05	5.79	5.66	3.48	3.25
CCNE2	0.27	0.93	0.0215095	0.0444273	0.17	2.79	0.87	1.62
DDX56	1.09	0.93	8.07255e-06	4.01787e-05	61.37	88.95	7.25	9.42
MED17	0.53	0.93	0.00331717	0.00858526	10.01	9.64	6.09	9.09
TALDO1	1.08	0.93	2.94242e-06	1.6046e-05	53.42	84.84	8.12	16.88
MAL	1.09	0.93	1.95412e-05	8.91278e-05	334.77	399.41	15.65	20.78
ERO1LB	1.08	0.93	2.66522e-12	4.53206e-11	7.87	14.32	2.9	5.19
ATP5B	1.04	0.93	3.07382e-05	0.00013333	820.42	1032.49	34.78	46.1
LSM12	1.04	0.92	2.18676e-07	1.51925e-06	27.66	29.51	12.46	18.51
IRF8	0.61	0.92	3.22462e-06	1.73791e-05	0.51	6.15	0.29	1.3
FTL	1.04	0.92	4.33372e-07	2.84596e-06	3085.54	3563.27	63.48	71.43
ABHD6	0.58	0.92	9.0637e-05	0.000349787	20.56	15.6	2.32	3.57
HAUS4	0.82	0.92	3.2957e-09	3.2877e-08	7.71	17.38	2.32	4.22
ITGB1	1.04	0.92	2.13716e-06	1.20249e-05	66.33	82.04	31.88	37.66
GPCPD1	1.07	0.92	2.45428e-06	1.36294e-05	38.17	44.7	12.75	13.31
NDUFC1	0.72	0.92	0.00132414	0.00382715	133.23	145.07	19.13	25.97
MAP1LC3A	1.08	0.92	9.03075e-11	1.18273e-09	30.35	46.96	3.19	6.82
WBSCR22	0.7	0.92	0.00407408	0.010326	30.33	43.58	7.83	17.21
YTHDF2	1.1	0.92	2.2809e-05	0.00010225	121.19	207.61	10.43	17.86
PDXK	0.8	0.92	4.64731e-07	3.03459e-06	4.71	6.94	3.19	5.52
ARHGAP27	0.91	0.92	4.34186e-07	2.84969e-06	13.61	18.4	5.22	8.12
ALOX5AP	1.07	0.92	2.01118e-05	9.12961e-05	915.11	1398.34	27.54	40.91
CLK2	0.77	0.92	7.45617e-07	4.64478e-06	17.95	20.2	3.48	4.87
PFN1	0.96	0.92	3.02046e-10	3.62204e-09	1674.28	2289.16	85.22	89.61
ZNF146	1.55	0.92	3.53209e-14	8.26451e-13	44.55	65	8.12	12.01
TAF13	0.46	0.92	0.000338818	0.00113816	6.31	16	2.32	4.22
SAMD9	1.11	0.92	7.98829e-06	3.98273e-05	69.05	75.26	17.97	23.7
NOP2	1.18	0.92	2.95057e-06	1.60828e-05	112.6	71.2	11.59	10.06
PNN	1.09	0.92	7.24675e-06	3.64777e-05	130.71	168.5	21.45	24.35
HSPBP1	1.11	0.92	4.29408e-12	6.99181e-11	23.36	38.85	2.9	4.87
MOSPD3	1.02	0.92	3.03136e-06	1.64531e-05	53.26	98.15	5.51	11.36
PYCARD	1.02	0.92	3.55755e-07	2.37143e-06	39.08	58.05	8.41	13.64
ZNF141	0.51	0.92	0.00541781	0.0132336	30.9	32.02	6.09	7.14
E2F4	1.3	0.92	1.86007e-09	1.94842e-08	54.11	53.67	7.54	9.42
ZDHHC5	0.62	0.92	0.000251656	0.000876039	12.4	19.11	4.06	7.47
PPIB	1.02	0.92	2.03074e-07	1.42115e-06	89.93	150.7	31.59	44.16
CELF2	0.96	0.92	7.03069e-05	0.000278794	60.57	73.64	25.51	31.82
CHD8	0.74	0.92	0.00107601	0.00317861	18.85	21.94	9.86	10.71
CD63	0.69	0.92	0.004656	0.0116017	149.5	219.64	16.23	25
DNHD1	0.61	0.92	4.49047e-06	2.33911e-05	2.56	3	2.03	3.25
NF1	1.2	0.92	5.10618e-13	9.57367e-12	4.7	9.92	5.51	7.79
SNRPG	1.06	0.92	2.60935e-06	1.43384e-05	230.7	304.46	26.96	35.71
CANT1	0.69	0.92	5.61727e-05	0.000229231	7.31	13.98	3.19	5.52
IFITM2	1.01	0.91	1.4566e-06	8.49892e-06	1582.18	2264.18	53.91	72.73
NGDN	2.31	0.91	2.25884e-27	3.21035e-25	53.15	63.65	7.25	11.04
SH3KBP1	1.09	0.91	4.36897e-06	2.28616e-05	93.08	117.18	26.67	35.71
INTS9	1.02	0.91	3.68401e-11	5.08439e-10	15.76	16.55	3.19	4.87
TMEM138	1.54	0.91	5.54067e-12	8.82216e-11	21.71	36.31	5.51	7.79
ZNF644	1.04	0.91	6.24407e-06	3.18342e-05	31.89	37.85	9.57	13.31
IFT20	0.94	0.91	2.41368e-08	2.09076e-07	21.52	27.16	5.51	6.82
LDOC1	1.07	0.91	7.7382e-11	1.02393e-09	51.64	62.34	3.77	4.55
NRBP1	1.06	0.91	2.09285e-05	9.45933e-05	80.82	100.35	13.62	17.86
BCL2	0.69	0.91	0.00123694	0.00360405	16.16	28.61	11.88	13.96
TMEM135	0.51	0.91	0.000153659	0.000564251	4.44	6.68	2.03	3.57
MEF2A	0.88	0.91	7.855e-07	4.87525e-06	9.43	15.35	6.96	8.77
NEB	0.4	0.91	0.0014143	0.00405717	0.07	0.48	0.29	1.62
BCL10	0.8	0.91	7.07678e-05	0.000280247	44.01	44.75	10.43	10.39
BROX	0.61	0.91	0.00755057	0.0176887	56.85	46.24	13.04	13.96
SLC25A11	1.12	0.91	4.03998e-06	2.1295e-05	69.95	132.65	6.67	13.31
BCDIN3D	0.68	0.91	9.8412e-07	5.99428e-06	9.42	21.81	2.03	3.25
GTF2H5	1.04	0.91	1.61358e-06	9.3204e-06	14.2	18.75	5.8	9.74
CTNNBIP1	0.6	0.91	8.75741e-06	4.32684e-05	2.47	7.7	2.03	4.55
ELMO2	1.39	0.91	2.5588e-09	2.6068e-08	26.01	33.33	7.25	10.06
SYTL1	0.83	0.91	0.000624947	0.00195766	65.04	77.49	16.81	19.16
LIX1L	1.02	0.91	2.45897e-06	1.36357e-05	34.15	45.48	12.75	15.91
ING5	0.82	0.91	1.98499e-07	1.39167e-06	9.88	10.38	3.48	5.52
AMMECR1	0.62	0.91	9.70169e-05	0.000372783	6.49	10.04	3.19	4.87
CCDC138	0.31	0.91	0.0156693	0.0336791	5.17	14.49	1.74	2.6
PDHB	1.03	0.91	2.08752e-05	9.44265e-05	56.34	67.81	11.01	13.96
H1F0	1.13	0.91	3.45784e-16	1.09963e-14	8.53	18.89	1.16	3.57
CTSW	1.1	0.9	1.49729e-05	6.98411e-05	249.36	348.94	11.88	19.81
NPIPA1	0.54	0.9	5.90264e-05	0.000239433	1.09	1.86	4.64	7.79
TCEAL8	0.96	0.9	3.34789e-08	2.80094e-07	68.19	100.79	6.38	7.47
ZNF486	0.32	0.9	0.007517	0.017628	2.38	4.46	0.87	1.3
CTDSP2	1.11	0.9	3.25497e-13	6.35105e-12	21.36	15.91	4.64	5.19
IKZF1	1.01	0.9	2.66187e-05	0.000117453	74.05	97.6	35.07	35.06
ZNHIT3	0.97	0.9	5.03251e-06	2.60262e-05	11.69	22.76	6.38	12.01
TEX2	0.3	0.9	0.0210474	0.0436336	1.2	5.88	1.45	1.3
NDUFA3	0.99	0.9	3.02231e-06	1.64117e-05	114.57	137.17	29.57	41.23
SKIL	0.98	0.9	1.77861e-05	8.151e-05	24.35	44.33	14.49	21.1
SYNRG	1.02	0.9	2.47429e-05	0.000109977	36.08	43.9	23.48	25.32
ARHGEF7	0.48	0.9	0.00695215	0.016407	13.76	19.23	6.96	6.82
PRPF40A	1	0.9	7.25919e-05	0.000286682	60.51	82.21	18.26	26.3
SOCS1	1.02	0.9	7.45015e-06	3.74034e-05	264.59	424.82	20.87	33.77
GPX4	1.01	0.9	1.54102e-05	7.17358e-05	156.37	198.14	22.9	26.95
MTMR9	0.74	0.9	1.72752e-07	1.22761e-06	3.94	10.83	2.9	4.55
TMEM33	1.84	0.9	6.72871e-17	2.42824e-15	27.87	37.5	7.83	9.74
HOPX	1.02	0.9	1.51844e-05	7.07418e-05	22.33	38.59	5.8	11.04
YY1	0.52	0.9	0.0245077	0.0496362	27.25	33.65	14.78	12.34
UCHL5	0.79	0.9	1.41122e-05	6.63371e-05	14.27	18.66	6.96	7.14
MPHOSPH10	1.54	0.9	1.46112e-18	6.70137e-17	14.9	20.59	4.64	7.14
CXorf65	0.33	0.9	0.0110144	0.0247121	16.87	35.94	2.9	4.22
SMARCB1	1.04	0.9	5.44518e-06	2.80595e-05	47.53	73.4	6.96	13.64
EIF3M	0.73	0.9	0.00244166	0.00656124	55.17	54.28	16.23	19.48
XBP1	1.14	0.9	8.42781e-06	4.18013e-05	235.06	306.49	17.39	24.03
MIS12	1.09	0.9	9.58995e-10	1.06358e-08	29.8	20.48	4.06	4.55
TMEM141	0.77	0.9	2.25587e-07	1.56349e-06	22.21	36.35	3.48	5.84
PIGO	0.98	0.9	8.77155e-13	1.60283e-11	4.45	8.18	1.16	2.92
FIS1	1.03	0.89	1.18771e-05	5.67576e-05	158.38	196.06	13.91	20.78
SERF2	0.96	0.89	6.79874e-09	6.43644e-08	176.11	209.78	76.81	83.12
RNASEH2A	0.76	0.89	1.23179e-08	1.11556e-07	18.94	26.94	1.74	3.25
LY6E	1	0.89	3.57108e-06	1.90149e-05	499.35	812.69	48.99	59.74
PTBP3	1.02	0.89	2.08242e-06	1.17399e-05	17.59	23.35	10.14	11.36
NBN	1.08	0.89	3.38386e-06	1.81609e-05	27.57	36.6	10.43	11.69
WDSUB1	0.78	0.89	5.35032e-09	5.18895e-08	6.34	19.97	0.87	1.95
FAM104B	0.63	0.89	5.56947e-06	2.86487e-05	19.07	25.23	2.03	4.55
TDP2	1.03	0.89	1.22616e-06	7.3024e-06	25.66	32.95	3.77	7.47
IRF3	1.04	0.89	1.46277e-05	6.83971e-05	67.13	94.5	15.07	15.26
LDHB	1.05	0.89	1.5943e-05	7.39765e-05	438.12	492.37	33.91	39.29
TRAV12-3	-0.59	0.89	4.55627e-05	0.000190664	134.73	261.13	2.32	2.92
CXXC1	1.03	0.89	8.66807e-08	6.59094e-07	38.52	40.9	5.51	8.44
IDS	0.71	0.89	0.00193832	0.00534977	29.54	37.37	25.51	26.62
UGDH	-0.48	0.89	0.000564338	0.00178922	6.59	5.27	2.32	2.27
BDH2	0.45	0.89	0.0102947	0.0232879	17.79	26.12	5.51	6.82
EXOC3	0.82	0.89	1.90048e-07	1.33894e-06	8.35	14.9	3.48	6.17
KCNK5	0.87	0.89	8.34604e-10	9.36448e-09	8.58	9.29	1.16	2.27
EPS15	1.1	0.89	1.38526e-06	8.11973e-06	30.89	27.49	13.62	14.29
CERS4	1.25	0.89	3.62318e-18	1.5452e-16	13.14	19.57	3.77	5.19
R3HCC1	0.61	0.89	0.000756758	0.00231573	44.9	65.38	5.22	6.17
ICMT	0.9	0.89	1.38429e-08	1.24208e-07	18.72	10.01	2.03	3.9
MKNK2	0.52	0.89	0.00887589	0.0204727	23.99	17.91	14.2	15.91
CD8A	0.78	0.89	0.00171838	0.00481666	78.43	126.47	4.35	8.12
UPF3A	0.99	0.89	1.58694e-06	9.18494e-06	33.88	58.9	10.72	14.29
ATP5S	1.1	0.89	3.16812e-10	3.77942e-09	15.5	27.67	4.35	6.82
NT5C2	0.37	0.89	0.0112671	0.0252397	6.17	6.85	4.93	6.82
FAM210B	0.51	0.89	0.00113955	0.00334401	19.86	19.36	2.61	4.87
CCNI	1.02	0.89	1.3991e-05	6.58212e-05	164.11	267.11	29.28	41.23
SLC35F2	1.02	0.89	9.7013e-06	4.73628e-05	57.71	61.91	7.25	10.71
TRIM37	0.48	0.89	0.00620941	0.0148829	23.31	19.34	5.8	4.55
PLIN2	0.73	0.89	0.000499234	0.00160581	30.3	49.1	8.41	10.39
ANAPC11	1	0.89	7.34895e-06	3.69437e-05	62.21	91.79	17.1	31.17
VPS16	1.07	0.89	3.02174e-09	3.04076e-08	29.69	35.91	4.93	7.14
CD40LG	0.97	0.89	7.32342e-05	0.000288921	175.72	341.4	9.57	16.23
PISD	1.14	0.89	3.1293e-10	3.73698e-09	24	36.07	4.64	7.14
ESD	1.67	0.89	1.00195e-13	2.14394e-12	85.18	76.89	8.41	11.69
HINT1	0.98	0.89	1.99165e-05	9.06241e-05	392.11	480.7	39.42	42.21
COPZ2	0.31	0.89	0.0101814	0.023068	0	10.13	0	0.97
NDUFC2	0.94	0.89	8.1427e-09	7.62104e-08	15.23	20.5	16.81	25.97
CCND3	1.02	0.89	5.20786e-05	0.000214424	164.39	216.54	24.93	34.09
RAB33A	0.97	0.89	5.38866e-08	4.28957e-07	65.89	83.28	5.22	6.17
RGS1	1.01	0.89	2.63997e-05	0.000116576	992.67	1357.62	42.61	56.17
CCT5	1	0.89	1.60689e-05	7.44708e-05	30.38	45.41	8.99	14.29
GTF2B	1.27	0.89	1.41733e-11	2.08115e-10	47.05	65.99	6.09	10.39
GLYR1	0.79	0.88	4.05865e-05	0.00017184	13.7	19.33	6.96	11.36
PLCD1	-0.64	0.88	6.34356e-05	0.000254096	19.7	16.39	3.48	3.25
FAM8A1	0.4	0.88	0.0017407	0.00486974	0.6	3.06	0.87	1.3
CALM3	0.98	0.88	9.33839e-06	4.59025e-05	105.36	145.4	31.01	41.23
RNF214	1.27	0.88	4.70419e-13	8.87781e-12	32.43	28.84	4.06	5.52
DERL2	0.65	0.88	0.00417223	0.0105284	43.35	44.21	12.46	14.29
CEP250	0.9	0.88	6.53867e-08	5.09635e-07	9.21	7.36	3.19	5.52
EIF4H	1.06	0.88	1.25461e-05	5.94856e-05	104.78	152.27	14.78	21.75
C1RL	0.46	0.88	0.00072993	0.00224378	3.66	5.63	3.48	4.22
NTMT1	1	0.88	1.25397e-05	5.94795e-05	74.09	84.12	9.86	12.66
NAP1L2	-0.31	0.88	0.0114645	0.0256271	1.02	9.4	0.29	0.32
GPR89B	0.42	0.88	0.00299505	0.00785221	2.81	3.72	4.64	5.19
ZNF567	1.52	0.88	9.64183e-20	5.11506e-18	21.27	35.89	3.19	5.84
IRF7	0.99	0.88	5.30839e-05	0.000217939	252.35	424.02	21.16	34.42
SYTL2	1.14	0.88	7.4121e-10	8.3655e-09	9.16	13.83	6.38	10.71
GTF3C3	1.29	0.88	1.07317e-16	3.72119e-15	9.73	12	4.64	4.55
NCOR1	1.02	0.88	4.21248e-05	0.000177895	88.51	110.16	38.26	37.99
MAP3K8	1.16	0.88	2.58102e-11	3.65261e-10	36.51	25.36	5.8	8.77
PSMB8	0.97	0.88	0.000109053	0.000414879	741.12	929.04	32.75	39.61
ERAP1	0.81	0.88	4.26621e-05	0.000179768	20.87	28.63	6.96	12.99
SOCS3	0.97	0.88	0.000106344	0.000405239	172.19	206.16	16.52	20.78
ZFYVE27	0.84	0.88	6.63334e-06	3.36557e-05	50.5	70.14	4.64	6.49
SEPHS2	1.92	0.88	1.86439e-24	1.77379e-22	62.26	67.63	4.06	8.12
NAA10	1.11	0.88	1.338e-09	1.43954e-08	10.21	18.47	8.41	14.61
SHC1	0.98	0.88	2.84322e-09	2.87115e-08	14.4	25.74	5.22	6.82
PIGN	0.42	0.88	0.00367573	0.00941799	8.86	10.95	3.19	3.9
PTEN	1.02	0.88	3.04301e-07	2.05702e-06	8.57	8.1	11.01	14.29
MRPL11	1.4	0.88	1.17401e-11	1.75097e-10	38.38	45.15	5.8	9.74
NSUN3	0.72	0.88	8.61498e-07	5.30068e-06	9.23	7.59	2.9	4.87
MDH1	0.56	0.87	0.0193897	0.0405991	86.48	102.85	15.94	21.43
MMADHC	0.81	0.87	0.000509082	0.0016338	116.42	124.73	10.14	13.64
HSD17B10	1	0.87	1.21386e-05	5.77196e-05	135.89	238.02	7.25	12.99
FAM162A	0.85	0.87	2.72954e-05	0.00012007	34.44	49.22	9.57	11.36
C19orf53	0.56	0.87	0.0126145	0.0278998	283.38	365.84	22.32	31.49
SPAG1	0.54	0.87	1.81242e-05	8.29935e-05	2.05	3.96	1.45	2.92
RPS2	0.95	0.87	5.25172e-07	3.3965e-06	1564.35	1999.54	73.62	80.19
TRIM27	2.16	0.87	9.98369e-24	8.57703e-22	23.77	37.28	8.12	11.04
FUT11	1.66	0.87	6.81044e-24	6.00322e-22	9.12	18.31	2.32	6.17
LPAR6	0.62	0.87	0.00712908	0.0167935	77.6	70.39	17.1	18.18
ALDH18A1	0.59	0.87	5.19283e-05	0.000213958	13	21.23	2.61	3.57
GEMIN7	1.05	0.87	3.92487e-10	4.61053e-09	21.42	28.2	4.06	5.52
DOK2	0.98	0.87	7.33848e-05	0.000289416	222.6	315.34	15.65	25.97
RGS2	0.92	0.87	0.000110226	0.000418648	164.51	273.8	9.86	14.61
INPP5B	0.53	0.87	0.000931858	0.00279582	4.46	3.98	6.09	4.55
ATXN10	1.03	0.87	1.74246e-05	8.01085e-05	49.76	59.8	9.57	10.71
SART3	0.88	0.87	7.21565e-05	0.000285354	31.73	26.66	7.54	8.77
GNPAT	1.05	0.87	5.64685e-06	2.90208e-05	51.99	72.4	7.25	10.39
RNFT1	0.99	0.87	6.82539e-08	5.29474e-07	25.11	24.92	7.83	9.42
HSPH1	1.17	0.87	4.40584e-07	2.88838e-06	53.29	89.42	8.7	14.94
MED16	0.66	0.87	0.00160621	0.00453983	38.16	47.56	8.7	7.79
AEBP2	1.09	0.87	5.23933e-08	4.18274e-07	20.46	30.2	5.8	8.77
ARL5B	0.6	0.87	4.87452e-05	0.000202218	6.01	6.76	3.19	4.87
SMIM11	0.84	0.87	3.64521e-06	1.93827e-05	21.61	29.88	5.22	7.47
EPSTI1	1.03	0.87	1.44583e-05	6.76878e-05	73.98	104.27	17.68	28.9
ZBTB44	0.37	0.87	0.00897629	0.0206798	5.5	4.35	2.9	3.25
HN1	0.61	0.87	0.0104705	0.0236623	115.2	148.26	16.81	26.62
GNAS	0.99	0.87	5.57397e-05	0.000227675	66.34	80.53	33.62	38.64
DAZAP2	0.98	0.87	1.17655e-05	5.6388e-05	379.81	515.63	48.7	60.71
DDX18	1.01	0.87	8.28279e-06	4.1153e-05	34.43	30.83	17.68	23.05
ZBTB43	1.08	0.87	1.75172e-07	1.24327e-06	27.48	31.1	6.09	9.42
C4orf3	1	0.87	1.57885e-05	7.33483e-05	188.65	260.72	26.38	33.44
CHFR	0.56	0.87	0.00923941	0.0211754	23.56	20.71	10.43	12.66
LEMD3	0.53	0.87	0.00093969	0.00281858	9.79	15.61	2.9	5.52
CXCR6	1.08	0.87	3.989e-05	0.000169139	254.29	426.67	15.36	23.05
ZFYVE28	0.53	0.87	0.000669926	0.00208494	7.33	8.01	3.77	6.82
STMN3	0.72	0.87	0.00025796	0.00089636	24.15	41.2	8.41	11.69
HK1	0.63	0.87	0.0123354	0.027335	80.48	81.11	13.91	19.16
TTF1	0.5	0.86	0.0068949	0.0162885	30.09	61.41	6.09	7.79
MDM4	0.99	0.86	1.89081e-05	8.64113e-05	52.77	56.08	29.86	30.19
MIA3	0.99	0.86	2.1889e-05	9.86248e-05	22.06	44.2	12.17	18.83
RBM6	0.96	0.86	3.8576e-05	0.000164112	121.16	124.63	37.97	37.99
CHST12	1.11	0.86	1.54263e-06	8.96002e-06	97.73	152.78	9.28	15.91
LIMS3L	0.89	0.86	2.43965e-10	2.99736e-09	1.49	3.3	2.9	7.14
PGK1	0.98	0.86	5.9204e-05	0.000239985	234.5	359.29	33.33	46.75
TRIM62	0.62	0.86	5.07415e-05	0.000209518	7.31	9.33	2.9	5.19
TRMT2A	0.63	0.86	0.00469557	0.0116864	32.56	45.53	6.96	8.12
B4GALT3	1.19	0.86	3.53534e-07	2.35799e-06	91.15	103.6	10.72	12.01
DNASE2	1.01	0.86	9.69315e-06	4.7343e-05	67.67	87.73	7.25	9.74
PRC1	0.8	0.86	1.5053e-09	1.60454e-08	4.09	8.16	1.16	3.57
LSM2	1.07	0.86	2.43826e-06	1.356e-05	144.09	190.01	6.96	14.94
CCND2	0.54	0.86	0.0239677	0.0486795	62.66	67.81	22.61	25.32
ATP5E	0.93	0.86	1.38804e-06	8.13185e-06	179.32	219.16	61.74	68.18
BFAR	0.97	0.86	6.3563e-10	7.2593e-09	24.81	30.41	4.35	6.82
IFNAR2	0.99	0.86	5.50579e-07	3.54687e-06	18.41	29.85	11.3	12.34
NDUFB4	0.57	0.86	0.0129029	0.0284573	192.3	186.09	21.45	23.7
SH2D1A	1.01	0.86	4.59015e-05	0.000191873	178.94	267	15.94	25.32
UBE2F	0.9	0.86	3.72555e-08	3.08551e-07	14.35	18.84	5.51	8.12
SERTAD2	-0.62	0.86	1.00605e-05	4.88885e-05	7.66	16.94	4.35	2.6
TCF7	1.04	0.86	1.04651e-05	5.06407e-05	28.01	30.1	13.04	15.26
ENO1	0.98	0.86	4.43146e-05	0.000185915	404.79	538.39	37.68	51.62
ADPRH	0.35	0.86	0.00468912	0.0116767	4.77	9.2	1.16	2.27
TP53I13	0.78	0.86	0.000309848	0.00105438	30.49	48.16	9.28	11.36
VPS4B	1.04	0.86	5.90066e-06	3.02173e-05	39.55	60.69	10.14	16.56
INTS4	-0.86	0.86	1.49232e-07	1.07305e-06	13.4	14.53	4.06	4.87
BMI1	1.14	0.86	4.95416e-14	1.12048e-12	12.6	9.29	2.61	5.84
PSMC4	0.98	0.85	3.70991e-05	0.000158707	106.28	167.65	11.88	14.94
RRP15	1.47	0.85	6.05089e-14	1.34735e-12	12.02	18.32	4.93	7.14
SMG5	0.87	0.85	0.000140388	0.000520499	29.88	30.2	10.14	9.09
ATG16L2	0.46	0.85	0.0126475	0.0279621	18.59	20.27	6.38	7.14
LAPTM5	0.94	0.85	3.21447e-05	0.00013896	807.67	1095.45	49.86	63.96
TMEM154	0.94	0.85	3.4318e-05	0.000147855	12.04	15.29	7.54	10.06
C12orf10	1.94	0.85	8.45252e-29	1.47432e-26	26.57	46.76	3.19	5.84
TMX3	0.98	0.85	2.27727e-05	0.000102166	15.39	29.44	7.25	9.09
YBX3	0.9	0.85	8.35744e-09	7.80933e-08	1.31	4.02	0.58	2.92
ZNF106	0.98	0.85	3.74858e-05	0.000159947	25.58	42.66	13.04	15.58
SLC39A1	1.42	0.85	2.70187e-13	5.35351e-12	57.85	70.79	7.54	9.42
SRP72	1.04	0.85	1.70471e-05	7.85493e-05	70.12	77.34	11.01	12.99
PHYKPL	1.04	0.85	2.26677e-05	0.000101775	52.94	70.01	17.97	20.45
MARCH6	0.98	0.85	5.72551e-05	0.000232823	42.79	57.42	22.32	24.68
PTPLAD2	1.22	0.85	1.08064e-09	1.18768e-08	19.85	20.35	6.09	9.09
DCTN3	0.97	0.85	2.93521e-05	0.000127993	34.67	51.39	8.12	12.99
UQCRC1	1.01	0.85	7.90084e-05	0.000309474	132.96	201.47	11.01	16.56
STAT1	0.98	0.85	5.96511e-05	0.000241627	233.87	258.18	32.46	41.88
NIT2	1.21	0.85	2.48416e-07	1.71141e-06	64.61	48.63	7.83	9.74
HEBP1	0.87	0.85	1.25278e-09	1.35418e-08	6.38	13.2	2.03	2.6
EXOSC5	0.7	0.85	3.16487e-06	1.70891e-05	41.86	47.62	2.9	4.22
DSTN	1	0.85	2.85411e-05	0.000124882	67.23	82.75	11.01	14.61
QARS	0.95	0.85	0.000186047	0.00067098	74	107.29	12.17	9.42
NKRF	0.32	0.85	0.009889	0.0224896	2.9	5.59	1.74	2.6
C5orf56	0.97	0.85	2.41345e-05	0.000107438	56.07	74.71	15.07	23.38
DPY19L2	0.44	0.85	0.000245295	0.000856436	0.49	1.6	0.58	0.97
FAM153A	0.87	0.85	3.83975e-10	4.52438e-09	1.02	5.44	0.87	2.92
CIB1	0.96	0.85	2.32989e-05	0.000104132	497.23	725.9	31.88	43.51
PDCD10	1	0.85	2.61972e-05	0.00011586	81.2	94.96	11.59	14.29
ROCK1	0.59	0.85	0.00908629	0.020866	30.23	30.75	15.65	16.88
SNX11	0.59	0.85	0.000206744	0.000735488	16.09	25.79	4.06	4.87
WDR5	0.53	0.85	0.000528566	0.0016893	10.98	17.05	4.06	5.52
ATP1A1	0.54	0.85	0.0214466	0.0443495	53.16	59.05	20.58	25.32
NAB1	0.53	0.85	0.00290452	0.00763839	13.28	19.07	6.67	7.47
PYGO2	1.01	0.85	3.25931e-08	2.73877e-07	31.71	35.15	6.67	7.79
EXOSC8	0.96	0.85	6.42993e-05	0.000257108	74.44	103.77	11.88	15.26
TM2D3	0.97	0.85	1.19333e-05	5.69317e-05	19.77	20.18	8.12	10.39
OARD1	0.89	0.85	4.5177e-07	2.95835e-06	17.47	25.29	4.64	6.82
STYXL1	1.33	0.85	5.35526e-14	1.20645e-12	55.07	90.22	4.93	7.47
TMX4	0.98	0.85	2.73881e-05	0.000120428	36.44	46.28	10.14	14.29
NECAP2	0.96	0.85	8.18588e-05	0.000319335	74.76	86.73	16.52	19.81
DCUN1D3	0.56	0.85	4.00248e-06	2.11167e-05	0	1.15	0	1.3
HIPK1	0.48	0.85	0.022294	0.0457484	20.5	22.78	10.14	11.36
SNRPD2	1	0.84	2.22724e-05	0.000100156	480.18	624.99	31.88	42.21
TPRA1	1.24	0.84	2.8069e-12	4.74494e-11	37.86	44.1	4.64	5.52
HDAC8	1.1	0.84	1.39449e-09	1.49492e-08	34.67	24.62	4.93	5.19
JAKMIP1	0.64	0.84	0.00206577	0.00567029	30.11	94.29	8.41	10.39
YWHAZ	0.93	0.84	2.87316e-05	0.000125656	215.91	283.14	49.28	61.69
VPS37A	0.54	0.84	0.00154668	0.0043964	16.91	18.86	4.35	5.84
SP3	1.82	0.84	1.39605e-15	4.00781e-14	21.55	21.97	10.72	11.04
CDCA4	1.27	0.84	9.76384e-14	2.09704e-12	26.83	34.38	4.06	7.14
NUCB2	1.72	0.84	5.56391e-16	1.71261e-14	16.38	20.16	4.35	7.47
LUZP1	0.98	0.84	1.90312e-05	8.69049e-05	22.92	26.31	7.25	14.29
FOXN2	1.07	0.84	1.65963e-06	9.54808e-06	31.08	37.34	10.14	13.96
SNRPF	0.93	0.84	2.53533e-05	0.000112429	48.2	57.42	11.88	15.91
TNFSF10	0.93	0.84	0.000246165	0.000859004	213.52	276.86	19.13	25.65
STX10	1.03	0.84	8.88538e-06	4.38442e-05	126.67	145.01	10.43	12.99
EIF2B5	1.11	0.84	3.57309e-07	2.37903e-06	39.4	50.06	8.99	12.01
TTC14	0.67	0.84	0.00356893	0.00918113	25.71	36.17	9.86	13.96
C12orf23	0.55	0.84	0.00113216	0.00332569	21.04	24.83	5.8	6.49
ZNF32	1.15	0.84	1.22345e-16	4.17935e-15	43.75	53.45	2.32	4.55
IFI6	0.91	0.84	3.26811e-05	0.00014112	1920.59	2852.15	58.84	62.99
ZNF410	0.81	0.83	8.44823e-09	7.88775e-08	4.08	8.04	3.48	5.19
HRAS	0.94	0.83	1.46029e-10	1.85105e-09	14.75	22.49	2.61	4.55
TPR	0.58	0.83	0.0152987	0.0330306	58.13	59.55	25.8	28.57
TMBIM4.1	0.56	0.83	0.000627982	0.00196556	13.13	11.77	13.62	19.48
GIMAP1	0.92	0.83	0.000157821	0.00057769	55.78	80.29	9.57	15.58
FAM133B	0.78	0.83	0.000196487	0.000703782	27.98	35.53	13.62	15.26
ILKAP	0.94	0.83	3.67913e-05	0.000157568	27.91	41.35	6.96	10.39
ZFAND2B	0.99	0.83	2.89299e-05	0.000126296	87.44	95.54	11.01	12.66
CAPZA1	0.95	0.83	4.2389e-05	0.000178883	258.64	270.24	41.74	44.48
SS18L2	1.02	0.83	8.26038e-06	4.10771e-05	207.29	230.86	14.49	21.75
CBWD5	0.48	0.83	0.00433381	0.0108979	3.19	4.08	11.59	11.04
FYB	0.95	0.83	2.95444e-05	0.000128637	184.27	201.89	42.61	51.3
IK	0.79	0.83	0.00156995	0.00445154	163.32	149.9	20	24.35
A2M	-0.39	0.83	0.0020677	0.00567422	0.83	2.63	1.45	1.62
TRAV26-1	-1.05	0.83	2.15462e-13	4.35749e-12	75.53	122.65	2.32	1.62
SNX6	0.98	0.83	4.61092e-05	0.000192531	79.44	85.73	14.49	19.48
CLDND1	1.01	0.83	2.40759e-05	0.000107219	105.08	112.61	24.64	28.57
ENY2	0.92	0.83	3.69465e-05	0.000158173	26.08	32.84	10.43	16.88
SP2	0.46	0.83	0.00186008	0.00516355	12.05	12.4	4.93	5.52
TRAF2	1.46	0.83	3.86239e-15	1.04621e-13	37.14	51.27	4.64	6.49
CNOT3	1.18	0.83	2.21307e-13	4.454e-12	4.69	5.07	5.22	5.19
USP33	0.97	0.83	3.6786e-05	0.000157568	40.33	46.67	13.62	14.29
MYL6B	0.96	0.83	2.95554e-10	3.55475e-09	6.02	14.14	2.32	4.87
BLVRB	0.44	0.83	0.000787375	0.00239968	14.33	31.83	2.03	3.9
TUBA4A	0.94	0.83	0.000262104	0.000909111	227.06	283.27	20.58	29.87
NUDC	0.92	0.83	7.99669e-05	0.000312591	113.45	154.85	17.1	25.65
TRIP4	1.37	0.83	5.65002e-12	8.97144e-11	27.96	34.28	5.51	7.79
NUDT8	0.33	0.83	0.00546403	0.0133274	3.76	19.41	0.58	2.27
NR4A1	1.15	0.83	2.90327e-07	1.96951e-06	42.38	32.65	9.86	16.88
MYO1F	0.99	0.83	5.64859e-05	0.00023023	59.97	73.98	21.16	24.03
HIST1H1E	0.98	0.83	8.73448e-06	4.31756e-05	186.99	287.03	11.59	16.56
PCNT	0.73	0.83	0.000862157	0.00260229	19.06	36.42	8.12	10.39
GADD45A	0.71	0.83	3.55903e-06	1.89683e-05	17.49	36.44	3.19	4.55
MCM7	1.21	0.83	3.93741e-08	3.23306e-07	50.91	68.61	6.67	9.74
ITGAE	0.9	0.83	3.53016e-05	0.000151695	23.2	43.12	10.43	14.61
POLG	0.79	0.82	1.27241e-06	7.53529e-06	12.02	18.56	4.06	7.47
PTPN22	0.95	0.82	4.98108e-05	0.000206126	61.55	80.48	17.1	24.68
HIST1H3H	0.44	0.82	0.00036418	0.00121414	6.27	57.69	0.29	1.95
AP3M2	0.91	0.82	0.000210215	0.000746588	43.48	62.66	11.59	15.58
POLR2J	0.96	0.82	2.78503e-05	0.000122231	236.6	317.77	17.39	24.35
TTC38	1.99	0.82	6.88869e-37	2.83224e-34	28.36	35.13	1.74	6.49
ZNF816	0.66	0.82	1.07414e-07	7.95724e-07	1.87	3.81	0.58	1.95
MIS18A	0.51	0.82	0.000441267	0.00143783	15.07	23.41	2.03	2.27
DLG1	1.62	0.82	1.67348e-20	9.82911e-19	9.12	24.29	5.22	9.42
BCAP29	1.34	0.82	4.34926e-15	1.17532e-13	9.28	13.1	5.22	7.47
FTH1	0.65	0.82	2.67133e-05	0.000117825	213.74	240	72.46	83.12
NSF	0.78	0.82	1.38923e-06	8.13469e-06	16.75	18.5	5.8	7.14
REST	1.01	0.82	7.53461e-05	0.000296329	72.02	117.55	16.23	23.7
ANP32A	0.98	0.82	2.33599e-05	0.000104343	23.02	31.2	11.01	15.26
PPRC1	0.42	0.82	0.0185381	0.0390361	17.41	21.45	5.51	7.14
CDK5	1.44	0.82	5.19696e-18	2.13669e-16	18.55	26.83	2.9	4.55
SLMO2	1.4	0.82	2.36521e-11	3.36984e-10	41.43	43.74	6.38	12.34
SNX20	0.88	0.82	0.000244485	0.000854436	48.51	65.54	16.52	15.26
MAST4	0.89	0.82	1.64691e-05	7.62333e-05	13.46	14.11	9.86	12.99
PTRHD1	0.76	0.82	2.71737e-06	1.49177e-05	23.64	25.56	5.22	8.44
DDX24	0.91	0.82	0.000132311	0.000493411	89.54	116.82	26.38	34.74
ZNF790	0.54	0.82	1.49728e-05	6.98411e-05	4.22	4.28	0.87	1.95
ALOX5	0.29	0.82	0.0163216	0.0348921	0.49	2.42	0.58	1.3
TMEM256	0.94	0.82	3.41421e-10	4.052e-09	18.48	35.87	5.22	10.06
RPL39L	0.38	0.81	0.0111739	0.0250406	35.94	31.69	3.19	2.92
OGDH	0.92	0.81	4.98125e-05	0.000206126	39.68	35.22	12.46	12.34
MAP4	0.6	0.81	0.0117702	0.0262289	25.53	31.57	13.62	19.81
EIF5A2	0.48	0.81	7.23832e-05	0.000286054	7.13	7.33	2.03	2.27
RRBP1	1.17	0.81	1.11356e-09	1.22088e-08	10.87	16.25	4.35	6.49
MAVS	1.19	0.81	3.36366e-09	3.35259e-08	17.92	24.97	2.32	5.19
CDPF1	1.35	0.81	4.42315e-15	1.19249e-13	35.62	50.16	2.61	4.22
SYPL1	0.58	0.81	0.0066905	0.015897	68.24	60.43	6.38	6.49
LDLR	1.57	0.81	1.63432e-24	1.58103e-22	10.18	21.71	2.9	4.87
MRPS16	0.94	0.81	5.599e-05	0.000228566	50.64	81	9.57	12.34
ATP6V1F	0.93	0.81	5.75114e-05	0.000233782	493.11	547.58	20.58	26.95
ZNF260	-0.39	0.81	0.0059409	0.0143019	8.21	7.68	3.48	3.57
VAMP8	0.91	0.81	0.000150794	0.000554789	664.36	865.95	27.83	36.69
HAX1	0.95	0.81	0.000128909	0.000482603	172.43	243.79	12.75	13.64
MRPS6	0.96	0.81	8.0244e-06	3.99783e-05	33.09	41.46	10.72	13.64
CALM2	0.92	0.81	8.50043e-05	0.000330822	180.85	246.25	37.97	51.3
AP2A1	1	0.81	5.01719e-08	4.02494e-07	10.26	20.64	5.22	7.47
TIMM50	0.84	0.81	3.9677e-08	3.2556e-07	8.42	11.88	3.48	4.55
ACTG1	0.9	0.81	2.72195e-05	0.000119874	1765.5	2330.4	65.8	70.78
TXNL4A	0.54	0.81	0.0137123	0.0299879	38.01	60.26	11.01	14.94
ZFYVE26	0.32	0.81	0.00854239	0.0197668	1.01	6.71	1.45	1.95
MANF	0.94	0.81	3.65456e-06	1.94235e-05	21.57	43.24	2.61	7.14
NOD1	0.33	0.81	0.0238307	0.0484271	3.98	5.89	4.06	4.55
PLSCR1	1.05	0.81	9.42492e-06	4.62685e-05	51.06	94.81	9.28	16.56
SYAP1	0.89	0.81	3.93959e-05	0.000167229	17.63	31.04	10.43	16.23
ARHGEF18	0.54	0.81	0.000411395	0.00135082	8.62	6.9	4.35	3.57
CCDC14	1.31	0.81	8.4998e-16	2.53497e-14	5.78	6.27	5.22	6.82
EMC10	0.42	0.81	0.00167046	0.0046926	7.74	7.29	4.93	6.49
BDP1	0.87	0.81	0.000347682	0.00116386	43.88	38.78	19.42	20.45
SUV39H1	0.44	0.81	0.000594627	0.00187287	7.01	12.98	0.58	1.95
PEX6	0.3	0.81	0.0162096	0.034685	2.59	8.92	0.87	1.62
RWDD1	0.82	0.81	0.000652503	0.00203236	49.42	51.49	14.78	15.58
CORO7	0.86	0.81	1.42321e-05	6.67646e-05	9.39	12.71	15.07	14.94
PAM	1.75	0.81	1.3685e-15	3.94842e-14	22.46	37.77	7.54	11.69
ARL14EP	1.37	0.81	1.13168e-09	1.2384e-08	22.73	32.47	8.12	9.42
PSMD12	1.01	0.81	8.32034e-07	5.13586e-06	31.6	38.46	8.7	9.74
DNAJC15	0.6	0.81	0.00817631	0.0190191	87.36	91.56	11.01	13.31
PCYT2	0.94	0.81	1.11509e-09	1.2214e-08	10.78	15.1	3.48	4.55
ARPC4	0.89	0.81	3.79811e-05	0.000161641	96.8	122.09	35.07	40.91
CYB5B	0.93	0.81	9.95334e-05	0.000381434	29.61	38.06	11.01	14.94
[truncated: 1,989 more rows]

## Sheet: CD8 Pre vs Post
Differential gene expression analysis. CD8 Pre vs Post
	MAST - Likelihood ratio test				Mean expression (CPM)		Fraction of expressing cells (CPM>0)
gene name	unshr_log2FoldChange	log2FoldChange	pvalue	padj	PRE	POST	PRE	POST
CREBRF	0.53	3.75	0.00404286	0.0119383	4.93	12.37	3.18	7.22
CNEP1R1	4.16	3.64	4.8368e-58	5.3732e-54	5.56	35.89	2.73	7.5
TTLL1	0.73	3.61	3.13062e-06	2.05422e-05	0.98	26.54	0.45	2.5
MUTYH	1.28	3.47	1.61958e-11	2.93506e-10	6.87	35.95	0.45	4.72
E4F1	2.22	3.46	1.77494e-26	2.62905e-24	0.08	23.37	0.91	6.11
SPATA2	0.58	3.32	7.83096e-05	0.000368775	0.58	6.51	0.45	1.94
FAM46A	0.73	3.31	1.76069e-05	9.66854e-05	0.18	12.16	0.91	1.94
RIPK2	1.25	3.18	1.88362e-13	4.70227e-12	0	13.14	0	2.22
RASSF2	2.64	3.1	5.19577e-27	8.87997e-25	4	41.86	4.55	10
CCL28	0.85	3.07	6.49546e-08	6.04846e-07	3.71	17.8	0.91	3.61
PFKFB3	1.77	3.02	6.9753e-20	4.58512e-18	2.15	15.7	2.27	9.44
RAB9A	1.03	2.99	3.14023e-09	3.80423e-08	24.21	32.65	2.73	3.33
RBM18	3.18	2.99	2.60184e-40	2.62762e-37	3.27	27.91	2.73	8.61
ANXA4	1.59	2.93	2.9362e-17	1.29437e-15	3.35	12.55	2.73	5
XRCC6BP1	1.68	2.91	1.16861e-19	7.50407e-18	3.04	47.15	0.45	3.33
NIF3L1	0.68	2.91	5.1681e-05	0.000254713	12.13	73.6	1.36	3.89
NR2C1	3.57	2.88	9.13954e-44	2.03062e-40	5.28	25.99	3.18	7.78
YIPF1	2.78	2.84	8.72974e-34	3.5918e-31	27.23	111.07	2.73	9.44
MASTL	0.56	2.82	0.000578704	0.00216022	1.11	14.45	1.36	3.33
SPTBN1	1.76	2.82	7.85453e-18	3.84387e-16	2.17	11.31	3.18	6.67
TOMM70A	0.88	2.8	7.95936e-07	5.95826e-06	2.76	14.53	3.18	3.06
BAK1	3.47	2.78	1.14871e-37	7.50651e-35	43.08	115.56	5	11.94
IFI27	1.03	2.72	7.41219e-08	6.82204e-07	0.49	37.43	0.45	4.72
SUV39H2	1.15	2.72	5.2595e-11	8.64316e-10	0.46	11.72	0.45	1.67
ADCK4	1.23	2.69	1.66234e-09	2.12998e-08	6.53	22.52	3.18	6.11
RAB11FIP1	2	2.68	5.56954e-18	2.79964e-16	5.82	9.94	3.64	8.33
RHOBTB3	0.96	2.68	1.46049e-09	1.89318e-08	0	1.7	0	1.39
PGAP3	1.61	2.68	2.00443e-14	5.89079e-13	14.89	33.96	5.45	6.11
SYCP2	0.65	2.68	9.92972e-05	0.000453948	0.91	6.33	0.45	1.67
VNN2	2.95	2.67	2.55572e-34	1.23442e-31	9.34	70.53	3.18	8.33
PET112	-0.37	2.67	0.00938633	0.0242664	0.86	2.78	0.91	1.39
MBIP	1.16	2.65	8.74642e-12	1.63576e-10	2.62	21.66	0.91	4.44
PHRF1	3.1	2.62	1.93044e-35	1.07226e-32	7.9	19.77	4.09	8.06
ZNF143	2.08	2.61	1.23092e-22	1.10277e-20	15.31	44.38	3.64	5.83
GNPDA2	1.04	2.6	1.9302e-08	1.96902e-07	6.06	14.34	1.82	4.72
SLC9A9	3.33	2.6	3.61415e-39	2.86783e-36	8.78	41.36	3.18	6.39
CBY1	1.23	2.59	2.94768e-12	5.93221e-11	6.15	28.61	1.36	3.06
RNF219	0.66	2.59	1.85136e-05	0.000101314	2.56	14.95	0.45	3.61
TMEM127	1.38	2.58	3.3739e-13	8.1127e-12	5.99	16.64	3.18	3.89
IGFBP4	0.38	2.57	0.0212734	0.0486668	8.84	36.07	2.27	3.06
JOSD1	0.71	2.57	9.53292e-05	0.000437247	9.64	19.11	1.82	5
FOXRED1	1.77	2.55	1.0953e-17	5.15581e-16	5.5	27.1	1.82	4.72
HSPA1A	1.93	2.54	7.14166e-15	2.21611e-13	37.95	122.9	12.27	22.78
PITPNA	0.64	2.53	2.57817e-05	0.00013645	0	8.36	0	1.67
PRUNE	0.4	2.5	0.00935522	0.0242142	3.75	23.22	1.36	2.5
FGFBP2	2.79	2.5	6.12334e-30	1.47879e-27	53.65	335.32	4.09	13.89
FAF1	1.15	2.49	2.09493e-11	3.74759e-10	2.32	11.24	3.18	5.28
PDE6D	2.05	2.45	8.19075e-21	6.10678e-19	11.13	54.16	3.64	6.94
SUPV3L1	2.03	2.44	9.09328e-21	6.64587e-19	9.36	42.12	4.09	8.61
PDHX	0.92	2.43	3.87823e-08	3.75617e-07	2.88	13.65	1.36	2.78
GPX7	1.01	2.42	3.31737e-10	4.75519e-09	4.19	34.44	0.91	3.06
C2orf69	0.65	2.41	3.84544e-05	0.000194531	1.19	8.76	1.36	3.33
ZNF287	1.29	2.41	1.26631e-13	3.29448e-12	6.07	28.91	0.45	3.06
TRIB3	2.89	2.39	1.9955e-27	3.51873e-25	14.45	58.96	2.27	4.72
AMPH	0.54	2.39	0.000651647	0.00240663	2	5.8	0.91	2.5
MPI	2.11	2.38	2.87498e-23	2.80159e-21	13.77	28.04	2.27	4.17
BTG3	2.9	2.37	2.07162e-29	4.69666e-27	22.06	78.13	5.91	11.39
TYROBP	2.84	2.37	6.95846e-28	1.3102e-25	47.52	190.56	3.18	5.83
AASDHPPT	1.44	2.36	7.19446e-11	1.15999e-09	3.61	14.27	5.45	8.06
CAAP1	2.62	2.35	9.70707e-28	1.79726e-25	7.33	26.95	2.73	5.56
GEM	0.75	2.35	0.000148571	0.000650816	16.6	41.89	2.27	3.89
NCR3	2.07	2.34	1.03881e-21	8.24297e-20	60.27	123.29	2.73	7.22
HPS6	0.72	2.34	1.17592e-05	6.77556e-05	3.4	12.66	0.91	2.22
CERK	2.64	2.34	8.27487e-25	1.03287e-22	13.18	44.3	7.27	10.28
HCFC1	1.04	2.33	8.69759e-08	7.84265e-07	3.95	12.32	2.73	6.94
FAM120AOS	2.79	2.33	2.22829e-24	2.63341e-22	38.8	67.09	5.45	7.78
TMEM60	2.72	2.33	1.07994e-26	1.7387e-24	63.6	146.03	4.55	5.28
C22orf29	1.32	2.31	4.51521e-14	1.26346e-12	4.77	12.1	1.36	3.06
LRRC37A2	2.52	2.31	1.13113e-29	2.67356e-27	0.86	6.17	3.64	5.83
STRADB	0.64	2.3	5.93964e-05	0.000289268	5.5	12.04	1.36	2.5
TPCN2	0.57	2.29	0.00169152	0.0056143	3.52	28.93	2.27	2.78
SMUG1	1.42	2.29	2.47438e-11	4.36734e-10	14.41	34.47	3.18	4.44
OTUD4	0.66	2.29	0.00065451	0.00241474	7.05	15.81	5	5.28
RDH13	0.66	2.28	0.000336338	0.00133968	3.71	9.6	3.64	4.17
CEP76	0.52	2.27	0.000927024	0.00330392	0.04	6.13	0.45	2.5
PUS7L	1.39	2.27	9.15484e-11	1.45287e-09	13.18	27.44	3.64	5.28
TMEM39B	0.56	2.27	0.00209549	0.00676514	21.34	21.16	2.73	3.33
BAG4	1.23	2.27	2.56747e-11	4.52014e-10	5.79	27.12	1.36	6.39
CASP10	1.26	2.26	1.91462e-12	3.94611e-11	0.86	9.65	1.36	6.67
AKTIP	2.55	2.26	1.43878e-20	1.02458e-18	21.44	60.35	5.45	10
CCDC22	1.85	2.26	2.61351e-16	1.00115e-14	34.18	84.92	3.18	6.94
CCDC30	0.52	2.25	0.00079258	0.00286427	0.46	2.32	0.91	2.5
ZHX2	1.24	2.25	9.15986e-13	2.01162e-11	3.46	10.25	1.36	4.44
ITPRIPL1	1.25	2.24	6.63809e-11	1.07653e-09	8.58	51.75	1.36	4.17
TWSG1	-0.57	2.24	2.71937e-05	0.000143231	1.49	5.01	1.36	1.39
MAPK13	0.41	2.24	0.0167243	0.0396311	13.13	35	2.27	3.89
CCDC65	0.42	2.23	0.00777203	0.0206653	4.01	17.68	1.36	1.94
AFTPH	2.64	2.22	9.16181e-25	1.11845e-22	12.26	34	7.73	11.39
ENTPD6	1.87	2.21	7.39271e-19	4.21157e-17	10.32	22.87	5	5.83
DEF8	1.06	2.21	7.78307e-09	8.68093e-08	2.14	13.65	1.82	4.44
CLSTN1	2.94	2.21	1.28347e-30	3.47866e-28	11.63	34.12	5.91	14.17
ATPAF2	1.04	2.2	4.08906e-09	4.83249e-08	9.25	22.45	2.27	3.61
GGT7	0.63	2.2	0.000407515	0.00159348	3.99	20.57	0.91	4.72
KIAA1524	0.48	2.2	0.00157794	0.00527826	0	11.45	0	1.39
ZNF624	0.41	2.19	0.013535	0.0331671	1.16	13.71	0.91	3.33
YEATS2	2.63	2.19	2.11769e-28	4.12727e-26	5.69	17.17	3.64	6.67
POLD1	0.69	2.18	1.59448e-05	8.88317e-05	2.63	16.38	2.27	4.72
FAM127B	2.05	2.18	1.29886e-20	9.36951e-19	27.54	129.77	2.73	6.94
HEMK1	2.46	2.18	1.13408e-23	1.18854e-21	6.19	15.02	3.18	5.56
SCN8A	0.35	2.18	0.0122608	0.0304982	0	0.32	0	0.56
KIR2DL3	1.08	2.17	1.30697e-08	1.38674e-07	3.47	42.53	1.82	6.39
SFXN3	3.5	2.17	7.13061e-41	8.80155e-38	22.38	49.91	5.91	10.83
CMAS	2.4	2.17	9.49005e-27	1.57351e-24	38.82	94.58	3.64	6.39
BRD1	0.48	2.16	0.00519774	0.0146813	7.49	14.87	3.18	4.17
MTERFD3	1.97	2.16	8.51276e-23	7.88069e-21	21.28	20.33	2.73	3.33
DGCR14	0.87	2.15	3.74685e-07	2.97525e-06	7.19	13.83	0.91	3.61
DDX41	2.85	2.15	1.80029e-25	2.46906e-23	21.59	36.78	5.45	5.83
AP5M1	2.16	2.14	1.81936e-20	1.24761e-18	18.35	40.8	4.55	8.89
CDKN2A	2.47	2.14	5.47698e-26	7.80048e-24	8.37	13.88	3.64	7.22
INO80D	2.42	2.14	1.07647e-21	8.48123e-20	13.83	8.18	7.27	6.67
FAHD2B	0.65	2.14	0.000190328	0.000808548	16.1	28.52	3.18	5.28
C8orf82	0.69	2.13	4.72186e-06	2.9686e-05	1.45	6.48	1.36	1.94
PGM1	1.48	2.13	1.87823e-12	3.88553e-11	14.52	29.67	4.09	6.11
GLB1	3.17	2.13	1.71868e-30	4.44019e-28	29.02	50.64	5.91	8.33
TESC	2.62	2.13	6.64454e-24	7.45598e-22	27.37	108.36	3.64	10.56
SLCO3A1	0.61	2.13	0.000230218	0.000957502	0	4.92	0	2.78
RAD52	1.96	2.13	5.37447e-17	2.27214e-15	10.19	23.52	5	8.06
PDE4A	1.83	2.13	6.25486e-15	1.95733e-13	4.17	20	2.73	7.5
TTI2	1.34	2.12	6.81876e-12	1.29487e-10	13.75	29.61	2.73	3.89
LPAR5	2.8	2.12	2.1536e-25	2.91761e-23	35.06	63.18	3.64	5.28
ZNF155	0.39	2.12	0.0104569	0.0266192	0	11.9	0	1.11
ZDHHC24	1.29	2.12	2.5806e-09	3.18178e-08	9.57	39.83	4.55	7.78
C10orf128	3.57	2.12	1.0421e-38	7.71779e-36	33.83	85.03	5.45	10.83
MRE11A	0.68	2.12	0.000101703	0.000463803	13.27	24.94	2.73	4.17
UNK	2.25	2.11	3.35378e-25	4.48881e-23	10.34	35.82	2.73	7.22
TTC16	3.55	2.11	7.2374e-44	2.01001e-40	8.45	23.8	2.73	5.83
PML	2.32	2.11	1.20333e-19	7.68265e-18	8.84	16.84	6.82	8.89
LRP5L	1.06	2.11	1.20057e-10	1.86012e-09	2.79	14.12	0.45	2.5
GNA12	-0.4	2.11	0.005986	0.0165173	4.47	5.89	1.36	1.11
ACSL3	2.05	2.11	1.84464e-18	9.85198e-17	8.18	17.94	3.18	5.56
PAF1	3.28	2.1	6.18928e-34	2.64449e-31	33.26	81.81	3.64	8.61
NBR1	1.61	2.1	1.34241e-14	4.06345e-13	12.01	19.54	6.36	9.44
ZDHHC2	2.29	2.1	1.70074e-23	1.71759e-21	2.01	8.72	3.18	5.28
ZNF592	1.41	2.1	2.00369e-15	6.82791e-14	1.87	9.5	1.82	5.28
KLRF1	2.38	2.1	7.08004e-25	9.04048e-23	8.2	84.45	0.91	4.72
FURIN	3.14	2.09	1.85883e-39	1.71487e-36	4.46	24.53	2.27	7.5
HIRIP3	0.97	2.08	4.28013e-08	4.11315e-07	16.26	16.98	2.27	3.89
CLUAP1	1.59	2.08	9.32362e-17	3.78015e-15	2.1	9.7	3.64	7.5
ULBP2	0.61	2.08	0.000116603	0.000522947	7.37	31.5	0.45	1.67
TADA1	0.57	2.08	0.000606564	0.00225286	33.59	58.85	2.27	3.06
SUGP1	2.44	2.08	6.9593e-22	5.64313e-20	5.04	26.73	3.64	6.67
DSTYK	0.42	2.07	0.0155008	0.0371838	5.12	6.6	2.27	2.5
EXOSC6	2.2	2.07	1.968e-22	1.70801e-20	15.82	50.96	6.36	11.11
MRPL15	0.99	2.07	3.28046e-07	2.6446e-06	44.2	66.32	3.64	4.17
TRIM59	2.85	2.06	5.33208e-29	1.11762e-26	11.98	23.31	5.45	8.06
MTX3	0.42	2.06	0.00535398	0.0150575	1.8	8.71	0.91	3.89
TTYH2	0.46	2.05	0.00269206	0.00838645	0	4.88	0	1.39
HEXIM2	1.08	2.05	3.05186e-10	4.40873e-09	3.33	10.75	0.91	3.89
TMEM141	1.57	2.04	1.59044e-13	4.03384e-12	23.59	42.21	4.55	7.22
RIC8A	2.4	2.04	6.85196e-19	3.94396e-17	14.83	54.79	4.09	10.56
HKR1	0.49	2.04	0.0126766	0.0313921	11.93	16.99	4.09	4.44
TMPRSS3	0.41	2.04	0.0135008	0.033101	4.25	11.49	3.18	2.5
RGS6	0.33	2.03	0.0168226	0.0398411	0	1.24	0	1.39
TRAV9-2	1.63	2.03	1.14159e-14	3.48403e-13	74.39	438.09	0.91	5.83
FOXK2	0.59	2.03	0.000156177	0.000678839	0.52	5.61	1.82	2.22
ZCCHC9	1.95	2.03	1.32391e-20	9.48861e-19	6.42	25.83	4.09	8.33
BBS2	0.45	2.03	0.0150197	0.0362489	5.59	11.84	2.73	5
CIITA	1	2.03	3.32664e-07	2.67305e-06	3.23	8.69	2.73	6.67
ACOT8	2.72	2.02	4.59316e-35	2.42978e-32	17.74	35.67	2.73	5.83
NAMPT	2.37	2.01	5.93621e-21	4.45577e-19	6.05	15.74	5.91	11.39
ZNF688	1.17	2.01	5.44874e-11	8.87537e-10	5.48	22.67	2.27	5.83
MRPL54	2.31	2.01	1.345e-21	1.05222e-19	27.77	137.63	2.73	9.72
RSPRY1	2.37	2.01	6.79468e-27	1.14367e-24	7.69	31.52	3.18	6.67
PPIF	1.63	2	7.73111e-11	1.23753e-09	40.87	58.81	5.45	6.94
PPM1A	1.18	2	1.34604e-08	1.4214e-07	2.82	10.09	5.91	8.89
ZKSCAN3	-0.41	1.99	0.00218396	0.00701203	0.65	5.53	0.91	0.83
POLG2	1.63	1.99	6.50035e-15	2.02844e-13	19.11	54.37	5.45	6.39
PPP2R5B	1.12	1.99	6.43733e-10	8.8178e-09	0	14.8	0	3.33
PHF6	1.71	1.98	2.1793e-17	9.76203e-16	3.86	13.07	3.64	4.72
GON4L	2.31	1.98	7.91102e-18	3.85454e-16	10.35	26.39	9.55	11.67
MAN2B2	2.79	1.98	3.06747e-29	6.81531e-27	8.94	17.87	4.09	6.11
USB1	2.63	1.97	2.87137e-20	1.95693e-18	26.22	45.51	9.09	10.83
FAM107B	2.4	1.97	3.74801e-19	2.25063e-17	21.78	32.55	14.09	14.17
PJA2	2.43	1.97	1.03296e-18	5.73759e-17	25.65	44.99	7.73	10
ADAP1	0.5	1.97	0.001965	0.00640529	0.64	5.43	0.91	3.33
HOOK3	2.33	1.96	3.89343e-20	2.62134e-18	6.55	10.82	7.73	10.28
NSUN4	1.93	1.96	3.84101e-15	1.25131e-13	10.62	12.61	5	6.39
AMZ2	2.34	1.95	1.00711e-15	3.62508e-14	49.88	112.87	5.45	12.22
NUP54	1.47	1.95	3.11208e-11	5.36002e-10	17.57	36.18	5	6.67
UTP14C	0.94	1.95	2.53078e-09	3.1273e-08	0.82	5.19	0.91	1.94
ANKRD34A	-0.36	1.94	0.00643226	0.017613	5.77	5.43	2.27	0.83
ACO1	0.59	1.94	0.000308505	0.00124322	1.53	4.11	1.36	2.5
CDK9	2.66	1.94	2.52441e-21	1.9208e-19	31.9	107.39	5.91	9.72
CD79B	0.85	1.93	4.32168e-06	2.73559e-05	12.22	45.21	1.82	5.56
CSNK2A1	1.79	1.93	7.17611e-16	2.62235e-14	10.11	20.06	3.64	7.78
NF2	2.34	1.93	8.82058e-20	5.69697e-18	4.91	25.75	3.18	9.17
INPP5B	1.04	1.93	6.90022e-08	6.38256e-07	2.05	7.73	3.18	7.5
GRHPR	2.71	1.92	1.10641e-26	1.75588e-24	11.72	26.34	2.73	8.61
FAM217B	1.25	1.92	2.76396e-11	4.82023e-10	13.93	18.95	3.64	4.72
NFYC	1.57	1.92	2.78163e-10	4.05526e-09	13.55	35.94	6.36	11.94
CLN5	2.24	1.92	4.61495e-19	2.74157e-17	11.86	25.39	2.73	5.28
ZBTB48	1.62	1.91	1.06809e-14	3.26871e-13	6.24	34.99	1.82	5
SNAPC2	0.39	1.91	0.0203839	0.0469575	11.81	37.47	2.27	3.61
BAG5	1.25	1.91	4.03106e-10	5.68287e-09	14	24.35	4.55	5.28
TATDN3	1.02	1.91	5.20419e-08	4.92867e-07	9.37	19.37	3.64	4.72
IER5	1.02	1.91	4.42911e-09	5.21771e-08	10.1	22.86	3.64	3.61
PHF19	1.24	1.9	4.16447e-11	6.96734e-10	4.54	14.01	2.27	5.28
DHRS7B	-0.5	1.9	0.000844024	0.00302949	8.48	11.53	2.27	1.94
METTL25	0.37	1.89	0.0137303	0.0335526	3.04	5.97	1.82	3.33
TTC21A	0.55	1.89	0.00056058	0.00210408	0.6	10.55	0.45	3.89
PIK3AP1	0.67	1.89	0.000409106	0.00159858	5.43	11.26	4.09	5
CDKN3	0.51	1.88	0.00134299	0.00458209	4.56	35.3	0.45	1.67
DHX34	0.81	1.88	2.11581e-06	1.44111e-05	2.9	10.06	1.36	4.17
PTER	1.35	1.88	1.88328e-10	2.85421e-09	20.31	30.97	3.18	4.72
CSRP2BP	0.55	1.88	0.000289462	0.00117316	5.69	12.03	1.82	4.17
AKT2	0.92	1.88	3.04343e-06	2.00056e-05	0.86	4.16	2.27	6.67
RNMT	1.13	1.88	8.8138e-08	7.941e-07	9.47	17.52	7.27	7.78
PCID2	0.91	1.87	0.000520319	0.00197615	14.35	36.52	5.91	10
ITPR2	2.6	1.87	8.18111e-23	7.63731e-21	17.99	14.2	9.55	9.44
CHAMP1	0.43	1.87	0.00758709	0.0202365	0.15	8.52	0.91	3.06
FBL	2.4	1.87	1.56938e-20	1.11046e-18	37.67	45.7	4.55	6.11
PMM2	2.1	1.87	2.20878e-22	1.90212e-20	1.86	6.25	3.18	7.5
METTL21A	2.13	1.87	2.55239e-19	1.56655e-17	3.52	16.23	1.82	4.72
MRPL1	2.1	1.87	6.20933e-18	3.10718e-16	19.96	63.74	7.73	10.83
SUV39H1	0.63	1.86	6.17555e-05	0.000299582	5.42	9.04	0.45	2.22
IQCE	0.42	1.86	0.00595576	0.0164472	0	4.12	0	2.22
PGPEP1	0.81	1.86	3.48938e-06	2.25895e-05	0.83	8.23	1.36	4.17
USP42	2.21	1.86	2.47865e-18	1.29884e-16	10.49	19.01	5.91	8.33
PARP16	0.94	1.86	3.54872e-07	2.83413e-06	3.34	27.69	2.27	5.28
FHL3	0.85	1.86	1.26416e-06	9.01964e-06	13.57	24.78	2.27	3.06
CD72	0.54	1.86	0.00093539	0.00332839	3.03	52.81	2.27	4.17
FUCA1	1.41	1.86	1.30289e-13	3.37385e-12	9.53	72.3	0.91	4.44
TSPYL4	2.57	1.86	1.25826e-23	1.28238e-21	14.62	60.19	3.64	6.67
RRM1	2.29	1.86	2.57585e-19	1.57226e-17	9.58	33.04	3.64	6.11
NUDT4	1.86	1.86	3.22931e-18	1.66085e-16	5.48	17.45	5	8.89
PAPSS1	0.49	1.85	0.0125897	0.0312046	15.81	34.65	4.09	5
BCAS4	1.81	1.85	1.46198e-18	7.92251e-17	18.19	111.38	21.36	26.94
CX3CR1	2.13	1.85	4.81751e-17	2.06151e-15	31.92	101.33	4.09	11.11
IQCG	0.64	1.85	0.000124748	0.000554997	4.09	9.98	1.82	3.06
PSMD10	3.18	1.85	4.69191e-37	2.89569e-34	56.61	138.01	5	10
PTPRM	0.91	1.84	4.73744e-08	4.49814e-07	0.54	3.68	1.82	3.06
PLEKHG3	0.84	1.84	5.97148e-06	3.68745e-05	3.6	7.97	1.82	3.89
PSMG1	0.81	1.84	3.02032e-06	1.98772e-05	12.26	40.6	1.82	4.44
MFSD3	0.38	1.84	0.0130329	0.032124	5.48	31.88	0.45	2.5
RECQL5	0.47	1.83	0.00195084	0.00636846	1.46	3.15	0.45	1.94
ELP5	1.88	1.83	3.3777e-15	1.10687e-13	37.42	91.03	6.36	7.5
SF3B5	2.33	1.83	2.39246e-17	1.06738e-15	229.26	441.58	12.27	17.22
ATXN7	2.26	1.83	1.37294e-19	8.7154e-18	11.7	23.64	15.91	23.06
ZFP57	0.83	1.82	1.00769e-06	7.35023e-06	0	25.96	0	3.33
C1orf216	1.1	1.82	3.281e-11	5.61613e-10	9.71	31.24	1.36	3.06
SPATA33	0.66	1.82	0.000102418	0.000466678	3.12	7.43	1.36	2.5
SLC50A1	2.39	1.82	1.12228e-26	1.75597e-24	19.1	69.61	4.09	9.72
ARMC10	2.18	1.82	2.61282e-19	1.58611e-17	11.28	18.39	4.55	7.5
FOSL2	1.71	1.81	6.87229e-13	1.54857e-11	7.54	31.08	9.09	12.78
SOCS4	1.35	1.81	3.1535e-09	3.81615e-08	4.36	13.7	3.64	5.56
SLC38A5	3.6	1.81	9.40399e-51	3.4823e-47	16.57	41.51	2.73	6.94
ALG6	0.58	1.81	0.0019692	0.00640958	15.84	21.12	6.36	5.83
ERI3	1.35	1.81	3.5647e-09	4.26727e-08	27.75	34.5	4.09	6.39
RAB11FIP2	0.7	1.8	6.63545e-06	4.04795e-05	1.09	3.15	0.91	1.94
AURKB	0.87	1.8	1.26836e-07	1.10772e-06	0	13.32	0	1.67
SPDL1	0.37	1.8	0.0136951	0.0334812	2.31	6.61	0.45	2.22
SLC12A2	0.44	1.8	0.0165945	0.0393571	4.11	5.87	4.09	4.72
CLTB	2.29	1.8	1.69564e-17	7.7245e-16	65.74	127.45	10.45	15.56
BMI1	0.47	1.8	0.0030345	0.00929683	5.57	10.14	3.64	4.72
CYCS	2.24	1.8	1.64692e-15	5.68187e-14	46.45	127.07	12.73	23.06
INVS	1.97	1.79	8.05208e-17	3.31298e-15	5.25	15.25	1.82	4.17
MRPL47	1.33	1.79	2.63551e-11	4.61386e-10	29.11	53.96	4.55	4.72
KCMF1	0.78	1.79	1.43878e-06	1.01611e-05	3.23	12.25	4.09	5
MORC2	0.43	1.79	0.00281473	0.00871241	2.99	7.29	1.82	2.78
PDCD11	0.57	1.78	0.00428393	0.0125269	8.32	16.56	5.91	7.78
ZC3H6	0.5	1.78	0.00649141	0.0177444	3.21	4.27	5.45	6.39
ZNF268	0.64	1.78	8.61609e-05	0.000400821	2.23	6.12	0.91	2.5
NUDT3	0.96	1.78	1.02933e-08	1.12106e-07	0.81	2.68	2.73	4.44
MPST	1.86	1.77	4.45936e-17	1.92759e-15	5.54	24.98	3.18	8.06
C12orf66	-0.42	1.77	0.00186459	0.00613377	1.78	5.04	1.36	1.11
ZNF559	0.98	1.77	1.56289e-07	1.33549e-06	16.03	15.08	3.64	4.17
MIPEP	0.38	1.77	0.0129891	0.0320372	0.31	8.75	0.91	2.5
CRK	0.61	1.77	0.00215487	0.00693465	24.3	42.2	3.64	5
B3GAT1	0.62	1.77	0.000115672	0.000519402	0	8.4	0	1.11
ACYP2	2.08	1.76	1.04261e-18	5.76236e-17	9.67	16.13	6.82	10.83
TRRAP	1.48	1.76	7.19985e-14	1.92731e-12	2	6.08	3.18	5.56
NSDHL	0.43	1.76	0.00788251	0.020924	11.84	40.79	0.91	2.5
TADA2A	1.92	1.76	9.10533e-19	5.10846e-17	2.83	8.34	0.91	3.89
DLST	1.26	1.76	7.42872e-13	1.66382e-11	2.77	7.46	0.91	3.89
CCDC28B	0.55	1.76	0.000199951	0.00084362	5.11	3.63	0.91	1.94
EDEM3	0.69	1.76	0.000450909	0.00174231	7.39	8.02	7.27	6.67
CSNK1G3	0.75	1.76	3.71302e-05	0.000188864	7.83	10.26	5.45	5.28
ANKRD13A	0.64	1.76	0.00103616	0.00364034	8.21	14.31	6.36	4.72
USP48	1.39	1.76	7.71353e-09	8.62069e-08	13.98	27.09	9.09	10.56
AP2A1	0.82	1.75	4.64794e-05	0.000231232	7.06	14.29	5.91	8.06
FZD3	-0.39	1.75	0.00337441	0.0101782	1.18	0.6	1.36	0.28
FAM73A	1.95	1.75	1.51222e-16	5.99973e-15	2.5	11.38	3.18	5
CHP1	2.08	1.75	2.35174e-13	5.77997e-12	51.19	122.75	10	18.89
SNRPF	1.26	1.75	1.43461e-07	1.2351e-06	21.88	39.66	8.18	10.83
MPHOSPH10	2.65	1.75	3.81763e-30	9.42445e-28	21.18	37.65	4.09	9.17
RRAS	0.38	1.75	0.0107271	0.0272073	0	37.15	0	2.5
CLECL1	0.77	1.75	3.56295e-05	0.0001824	11.59	30.46	2.73	6.67
STRIP1	1.64	1.75	1.60657e-14	4.79594e-13	15.28	12.85	4.55	6.11
HDGF	1.15	1.75	1.68512e-08	1.74627e-07	10.03	41.26	3.18	6.67
SRBD1	0.86	1.75	2.83695e-06	1.87929e-05	14	16.72	3.64	4.72
AARS2	0.64	1.74	0.000325797	0.00130425	15.85	48.36	4.09	3.33
TEX30	1.52	1.74	1.27547e-13	3.31057e-12	11.09	49.28	3.18	5.56
CHPF	0.92	1.74	1.40651e-07	1.21312e-06	13.77	27.87	1.82	4.17
ZNF174	0.37	1.74	0.0143966	0.0349502	1.85	10.45	0.45	1.67
GALNT3	1.23	1.74	1.28621e-12	2.73239e-11	0.37	1.9	0.45	2.5
FAM134C	2.04	1.74	7.0611e-14	1.90393e-12	28.97	55.1	7.73	10.56
GPN1	2.18	1.74	8.72482e-16	3.16745e-14	18.3	59.37	3.64	6.67
MRPL10	2.24	1.73	4.91735e-16	1.83929e-14	52.94	104.87	5	11.94
ZNF426	1.23	1.73	3.4104e-10	4.86969e-09	36.48	40.55	1.82	4.72
GGACT	0.39	1.73	0.0126058	0.0312305	2.84	15.99	0.45	1.94
AGAP2	0.74	1.73	3.40496e-05	0.000175119	7.69	12.24	2.73	4.44
IL7	0.78	1.73	6.79781e-07	5.1442e-06	2.41	13.57	1.36	2.5
THUMPD1	2.05	1.73	1.41189e-13	3.62234e-12	31.21	53.27	8.18	11.67
SRPK1	2.26	1.73	1.63243e-16	6.38546e-15	23.37	39.59	8.18	11.11
SLC43A3	2.26	1.72	1.06707e-23	1.15088e-21	9.35	15.8	3.18	7.5
AARSD1	0.77	1.72	1.23504e-06	8.84893e-06	0.05	4.1	0.45	1.94
GART	1.98	1.72	1.6103e-14	4.79594e-13	10.12	23.45	7.73	11.94
ZCCHC10	2.04	1.72	1.69662e-17	7.7245e-16	10.64	41.34	6.36	7.78
RRM2	0.49	1.71	0.00195498	0.00638011	1.06	10.51	0.45	1.39
CEBPG	3.47	1.71	2.42487e-40	2.62762e-37	11.68	34.95	1.82	6.39
CWC22	1.04	1.71	5.62004e-06	3.49569e-05	37.05	52.56	6.36	8.33
SLC35G2	0.34	1.71	0.0124766	0.0309658	3.7	3.61	4.55	6.67
TMEM5	1.47	1.7	2.60969e-12	5.29034e-11	14.16	21.55	4.55	5.83
HTATSF1	2.08	1.7	4.04624e-15	1.31049e-13	39.71	83.84	8.18	15.28
NSA2	1.93	1.7	5.5286e-14	1.51648e-12	52.59	66.39	5.45	9.17
CADM1	0.89	1.69	1.14015e-06	8.23535e-06	2.33	4.96	2.27	3.89
FAM193B	1.3	1.69	2.63732e-11	4.61386e-10	5.29	28.95	5	5.56
NARFL	1.92	1.69	2.53232e-19	1.56287e-17	7.7	13.94	2.73	5.28
CASC5	0.35	1.69	0.0186366	0.0434855	0	2.33	0	2.22
PEX10	0.63	1.69	6.65123e-05	0.000318958	0	12.07	0	2.5
CTSO	0.61	1.69	0.000279212	0.00113618	10.81	25.52	2.27	2.78
LMNB1	0.58	1.69	0.000390757	0.00153444	6.7	13.88	1.82	3.61
EIF3J	1.89	1.69	3.16389e-14	9.03538e-13	22.92	53.01	11.36	15.28
IFT20	1.65	1.68	1.80013e-15	6.17213e-14	8.72	24.95	4.09	5.56
ARHGAP21	0.63	1.68	0.000128347	0.000569186	0.62	3.95	1.36	3.33
ZNF140	0.43	1.68	0.00592572	0.0163794	3.5	12.68	0.91	3.06
ACTR3C	0.7	1.68	1.32785e-05	7.54533e-05	0.9	7.07	0.45	3.06
SLMO2	1.98	1.68	3.93318e-14	1.10617e-12	28.37	58.42	10	13.89
PCGF1	1.11	1.68	1.16003e-07	1.02438e-06	38.88	48.57	4.09	6.67
RGS10	2.04	1.68	1.55931e-15	5.41326e-14	125.55	171.24	14.55	19.44
IPO13	1.21	1.67	1.25103e-12	2.66751e-11	7.37	8.77	1.36	1.39
YES1	0.57	1.67	0.000237551	0.000983948	0	5.54	0	1.94
BUD13	0.64	1.67	0.000610541	0.00226612	16.78	48.66	2.27	4.17
UTP15	0.37	1.67	0.0102751	0.0262345	1.96	16.57	1.36	2.22
MFAP3	-0.6	1.67	0.00104609	0.00366941	6.23	11.57	3.64	4.17
TDP1	0.53	1.67	0.010987	0.0277523	18.7	24.76	5.45	5.83
PDP1	-0.58	1.67	3.90398e-05	0.000197223	14.14	14.62	4.09	3.33
DCTN1	1.96	1.67	2.11659e-14	6.20402e-13	7.37	19.09	9.55	19.17
OBFC1	3.18	1.67	4.21342e-36	2.46352e-33	106.6	218.58	7.27	10.56
UXS1	0.95	1.66	3.28757e-05	0.000169789	9.36	12.71	5	6.11
FAM120A	1.7	1.66	5.48756e-17	2.30914e-15	4.68	14.92	3.64	6.94
MAD1L1	2.75	1.66	8.26704e-25	1.03287e-22	18.38	28.89	4.55	11.94
VCAM1	0.8	1.66	7.33411e-06	4.42797e-05	2.26	14.9	1.82	4.17
SNX4	1.5	1.66	2.76399e-13	6.71885e-12	25.75	48.51	3.18	6.39
HPSE	-0.33	1.66	0.0214477	0.0490362	1.57	1.88	1.82	1.39
PLEKHA3	0.52	1.65	0.00412173	0.0121133	6.58	4.95	4.09	5.28
TMEM30A	1.91	1.65	5.96626e-15	1.8776e-13	14.45	15.19	8.64	8.33
TTF2	1.27	1.65	2.50758e-09	3.10208e-08	5.86	12.86	2.73	5.56
EPS8L1	0.61	1.65	0.000195813	0.000829628	0.69	8.25	0.45	2.22
ACTR5	1.48	1.65	7.82148e-15	2.41358e-13	32.86	34.78	2.27	5
CEBPZ	2.33	1.65	1.71692e-19	1.07759e-17	33.65	46.54	9.09	15
LRMP	1.98	1.65	1.42878e-12	2.99478e-11	31.14	57.97	7.27	12.5
B3GALTL	1.19	1.65	6.76544e-12	1.28694e-10	7.48	11.85	1.36	2.78
F2RL2	0.37	1.65	0.0144728	0.0351044	7.27	18.62	1.36	2.5
LTA4H	0.54	1.64	0.00486735	0.0138858	9.96	12.38	4.09	5.56
C1orf50	1.15	1.64	6.53209e-09	7.44257e-08	13.92	42.56	3.18	4.44
HSPA1B	2.3	1.64	2.15995e-19	1.3405e-17	44.16	105.72	7.27	14.44
CCDC146	1.52	1.64	7.57317e-15	2.34346e-13	6.77	14.42	2.73	5
AHCYL1	0.91	1.64	8.68266e-08	7.84193e-07	11.14	13.27	1.82	4.17
PRPF8	1.99	1.64	1.00121e-12	2.19377e-11	21.01	50.21	12.73	16.11
VCPIP1	1.21	1.64	1.03368e-07	9.22345e-07	9.98	21.24	4.55	7.78
MAST2	0.51	1.63	0.00121989	0.00421646	1.9	4.63	0.45	2.22
IARS2	1.33	1.63	8.74297e-11	1.39149e-09	24.95	32.74	5	8.61
MPV17L2	0.45	1.63	0.00255992	0.00804928	5.58	27.08	0.91	3.06
FARSA	1.9	1.63	9.51247e-12	1.77603e-10	53.92	117.17	5.91	10.56
SPG20	-0.39	1.63	0.00346033	0.0104147	0.21	2.77	0.45	0.83
TUBD1	1.37	1.63	2.85539e-12	5.75691e-11	11.24	33.06	2.73	5.83
NXT2	0.63	1.63	7.66479e-05	0.000361387	4.01	16.98	0.45	2.5
YWHAG	1.16	1.62	6.30418e-08	5.89008e-07	14.64	16.23	5.45	5
MR1	1.91	1.62	5.46634e-14	1.50311e-12	15.67	32.01	10	10.56
CATSPERG	0.74	1.62	6.46088e-06	3.95449e-05	0.57	9.94	0.91	2.22
GOLGA2	1.78	1.62	3.02192e-14	8.67454e-13	4.78	10.69	5.45	9.44
MFN1	1.31	1.62	1.9886e-10	2.98936e-09	6.51	13.47	7.73	10.83
C12orf5	1.03	1.61	1.27768e-08	1.36289e-07	46.34	75.55	2.73	4.17
MRPL50	2.04	1.61	1.00833e-15	3.62508e-14	30.49	44.81	4.55	7.5
TRMT10B	1.98	1.61	1.22079e-15	4.31903e-14	27.48	41.23	7.27	6.11
RPS6KC1	-0.55	1.61	0.000945518	0.0033612	5.6	8.08	3.64	3.89
ICT1	1.72	1.61	1.06789e-14	3.26871e-13	12.4	50.32	2.27	3.89
PCCB	1.02	1.61	8.63757e-09	9.53824e-08	4.52	13.41	1.82	4.72
SLC30A7	1.84	1.61	4.21822e-12	8.30854e-11	8.9	27.17	10	13.33
COG1	1.82	1.61	8.93534e-17	3.64936e-15	30.74	25.3	5.91	5.83
EXD3	0.61	1.61	0.000271003	0.00110751	1.95	5.53	2.27	2.78
MMADHC	1.92	1.61	5.01947e-13	1.16169e-11	50.24	98.08	8.18	12.22
ZDHHC3	2.12	1.61	9.72291e-18	4.65244e-16	7.29	13.85	4.09	5.83
ISY1	1.93	1.6	1.54238e-17	7.08029e-16	5.56	24.41	3.64	10.56
ARMC7	1.85	1.6	4.64102e-19	2.7424e-17	15.38	32.27	3.64	4.72
LAMTOR3	0.69	1.6	0.000502622	0.00191943	11.44	28.01	3.18	6.39
FBXO42	2.12	1.6	3.54718e-20	2.40278e-18	14.26	21.64	5.45	7.78
RNF113A	1.85	1.6	1.5414e-12	3.21868e-11	79.28	127.02	5.91	10.28
DYRK1A	0.7	1.59	0.000102917	0.000468374	8.92	10.57	4.55	4.72
SERINC3	2.03	1.59	2.45118e-12	4.97809e-11	66.73	107.52	9.55	15.56
CBLL1	2.03	1.59	4.07273e-13	9.6469e-12	19.19	58.88	3.64	9.44
CYB5B	1.89	1.59	1.2443e-11	2.30383e-10	25.42	45.85	8.18	14.17
AIDA	0.51	1.59	0.00310704	0.00948245	4.02	5.75	3.18	4.44
C19orf12	1.84	1.59	8.19056e-17	3.35752e-15	29.84	54.24	6.82	8.33
NAA50	1.8	1.59	1.46756e-13	3.73924e-12	13.35	24.49	6.82	10.28
TMEM42	0.48	1.59	0.00262761	0.00822266	12.08	28.58	2.27	4.44
ZNF212	1.14	1.59	4.19519e-10	5.89183e-09	9.48	20.41	1.82	3.06
NUDT7	0.4	1.58	0.00578206	0.0160582	0.07	9.54	0.45	1.67
SOCS2	0.37	1.58	0.0098127	0.0252243	3.45	3.7	1.36	2.78
ZNF195	0.56	1.58	0.00567921	0.0158213	14.77	20.02	3.18	5.56
PIK3C2A	1.07	1.58	6.66274e-08	6.19902e-07	5.71	10.34	4.55	6.67
LTB4R	0.81	1.58	2.72175e-07	2.22487e-06	1.52	7.13	1.82	3.61
MOAP1	1.17	1.58	4.12719e-10	5.80366e-09	46.35	50.44	3.18	3.89
MEF2BNB	0.53	1.58	0.00891252	0.0232597	6.46	18.08	5.45	5.56
FBXO2	0.57	1.57	0.000833658	0.00299615	0.73	20.75	0.91	3.61
GEMIN8	0.64	1.57	0.000522907	0.00198394	24.65	35.35	2.27	2.5
CDC23	0.74	1.57	0.000107076	0.000484329	12.01	20.03	2.73	3.89
EHMT2	2.32	1.57	1.827e-23	1.82848e-21	11.79	32.87	6.36	9.44
SLC23A2	0.49	1.57	0.00855655	0.0224928	6.86	14.14	5	3.89
KIAA1429	0.98	1.57	3.14158e-07	2.54929e-06	6.88	10.83	3.64	5
ZNF615	0.37	1.57	0.0123831	0.0307542	0	3.82	0	1.67
TMEM147	1.26	1.57	6.65544e-06	4.05792e-05	100.36	218.74	10	17.22
HNRNPD	1.85	1.57	3.30924e-12	6.60006e-11	20.07	39.67	11.36	17.78
SLC25A42	1.63	1.57	1.34557e-17	6.25437e-16	14.05	29.55	2.27	4.72
ANKMY2	0.43	1.57	0.00705632	0.0190541	6.57	20.09	1.82	2.5
THEM6	0.81	1.57	7.64706e-05	0.000361034	20.64	38.24	4.55	5.28
TPK1	0.95	1.57	4.51239e-08	4.30654e-07	1.38	4.37	2.27	3.61
LYRM5	1.23	1.57	6.89096e-10	9.39284e-09	14.38	41.56	1.82	6.94
GALK2	1.7	1.56	7.1904e-18	3.58198e-16	4.85	14.37	2.73	5.83
SART3	1.81	1.56	3.75514e-12	7.43599e-11	17.61	25.82	7.73	9.44
ATP6V1A	0.65	1.56	0.000473277	0.00182177	12.16	28.48	4.09	3.33
SETDB2	1.32	1.56	1.71854e-10	2.62243e-09	4.29	21.33	3.18	7.78
MYBL1	0.79	1.56	2.50822e-05	0.000133256	5.78	13.71	4.09	5.56
EIF2AK4	1.99	1.56	2.65316e-16	1.01285e-14	5.14	6.74	5	5.83
WDR81	0.37	1.56	0.0207481	0.0476319	1.87	7.82	1.82	2.22
ASTE1	1.9	1.56	1.83496e-12	3.80309e-11	37.2	64.21	4.55	7.78
FAM35A	0.72	1.56	7.2707e-05	0.000345172	8.97	11.18	6.82	8.06
LRRC45	1	1.56	2.03199e-08	2.0615e-07	5.07	13.84	2.27	4.44
MRPS35	1.4	1.55	3.13357e-11	5.38867e-10	37.35	57.92	3.64	6.39
TNFAIP8L2	0.54	1.55	0.000864615	0.0030924	12.99	44.12	0.91	2.5
PRKCSH	1.9	1.55	7.20119e-13	1.61612e-11	22.75	38.46	12.27	17.78
CWC27	2.38	1.55	2.27626e-24	2.66179e-22	29.85	68.58	5.91	7.78
SLC33A1	2.37	1.55	2.2139e-24	2.63341e-22	10.91	18.51	3.64	7.5
TBC1D25	1.24	1.55	3.11716e-10	4.49137e-09	14.53	34.2	2.73	4.44
FUT11	1.6	1.55	7.0525e-13	1.58596e-11	11.18	23.41	4.55	7.78
ENOX2	1.37	1.54	4.26405e-10	5.98097e-09	20.86	15.66	3.18	4.44
ZNF501	0.96	1.54	4.31001e-09	5.08819e-08	2.44	3.29	0.91	0.56
B3GALT4	1.34	1.54	3.6281e-12	7.22305e-11	21.99	37.95	3.64	4.44
VPS37B	1.12	1.54	1.28307e-08	1.36529e-07	8.21	14.83	5.91	10.56
ATF7IP2	1.43	1.54	4.09044e-13	9.66824e-12	8.32	14.99	3.64	5.28
SLC26A2	0.4	1.54	0.00916435	0.0238368	1.07	5.53	1.36	2.78
SMNDC1	0.74	1.54	0.000172337	0.000740901	4.73	16.3	4.55	8.06
DNAJB1	1.8	1.54	9.70537e-09	1.06433e-07	231.31	580.18	23.64	28.33
THAP1	0.71	1.53	0.000119794	0.000534453	28.63	23.87	3.64	3.06
KPNA4	1.88	1.53	2.73053e-16	1.03882e-14	6.49	12.78	5.91	7.78
BBS4	0.46	1.53	0.00896607	0.0233859	21.02	33.3	5	4.44
STX18	0.61	1.53	0.000567973	0.00212803	7.91	15.78	2.27	3.89
ZMAT5	1.44	1.53	5.8983e-13	1.34271e-11	3.05	11.16	2.73	5.56
SMC6	1.39	1.53	5.86777e-08	5.50549e-07	14.66	21.07	7.73	8.61
DOK1	1.55	1.52	1.78306e-14	5.26808e-13	24.47	31.67	3.18	5.28
CSRNP1	1.81	1.52	5.19088e-13	1.19367e-11	25.28	46.1	7.27	10.28
MCUR1	1.46	1.52	3.71957e-12	7.39189e-11	5.34	12.97	2.73	5.28
CA14	0.36	1.51	0.0102624	0.026208	0.02	2.66	0.45	0.56
ZMYM2	1.56	1.51	3.80965e-11	6.43182e-10	14.52	10.64	8.64	8.61
CSGALNACT1	1.13	1.51	2.14097e-07	1.78962e-06	8.97	30.59	5.45	10.56
EXOSC5	0.49	1.51	0.00564225	0.0157368	29.45	51.13	3.64	3.89
UBALD1	0.68	1.51	0.0001571	0.00068226	4.19	9.5	2.73	5
RBM48	1.32	1.51	1.90572e-07	1.60262e-06	19.49	37.02	3.64	8.61
CHPF2	1.69	1.51	1.96574e-13	4.89628e-12	9.56	17.17	5.91	7.78
ZNF197	1.47	1.51	3.65828e-15	1.19529e-13	12.32	10.42	2.73	2.78
ITGAX	0.47	1.5	0.00579832	0.0160994	4.09	7.66	2.73	3.61
ATG14	0.81	1.5	3.04198e-05	0.000158134	8.04	12.71	3.18	5.83
FAIM	0.71	1.5	1.97392e-05	0.000107243	3.83	8.03	0.91	2.5
SHMT2	0.85	1.5	2.29878e-05	0.000123249	9.97	20.87	2.73	6.11
FAM69A	1.76	1.5	1.91207e-12	3.94611e-11	17.48	44.1	5.45	6.67
CDIP1	1.76	1.5	3.19871e-11	5.49219e-10	16.59	43.6	5	11.39
KLHL21	0.6	1.5	0.000322751	0.00129345	7.35	7.99	4.09	4.17
CLTA	1.79	1.5	1.28009e-10	1.97782e-09	75.14	123.29	9.09	14.17
ARHGEF39	1.28	1.49	1.39998e-11	2.56367e-10	5.88	11.33	4.55	7.22
ME2	1.85	1.49	6.76388e-13	1.52723e-11	28.96	31.28	6.36	8.06
TAF6	0.54	1.49	0.00569144	0.0158501	8.38	19.38	5.45	7.22
JKAMP	1.7	1.49	6.48267e-10	8.86896e-09	35.74	82.67	5.45	11.11
RING1	0.48	1.49	0.00287953	0.00889016	10.3	26.43	1.82	2.78
ENDOV	1.5	1.49	1.23413e-15	4.35237e-14	6.74	16.34	1.36	3.89
MXD1	1.62	1.49	1.02637e-12	2.23567e-11	5.32	11.17	2.73	5.83
MSANTD4	0.88	1.49	1.86891e-07	1.57524e-06	4.24	5.62	2.27	1.67
TTBK2	0.61	1.49	0.000211298	0.000886781	0.85	1.85	2.73	3.61
TNFSF13B	0.81	1.49	2.26089e-06	1.52961e-05	2.67	16.02	0.91	3.61
CCNYL1	0.95	1.48	1.17666e-08	1.26417e-07	1.24	3.96	0.91	1.94
ITPKB	1.27	1.48	6.22877e-07	4.75897e-06	9.25	23.28	6.36	6.11
ZNF880	1.22	1.48	7.54556e-11	1.2116e-09	5.38	21.08	1.82	4.72
POLB	0.64	1.48	0.000127825	0.000567323	12.38	12.21	2.27	3.33
JHDM1D	0.99	1.48	2.83282e-07	2.31056e-06	10.75	7.86	4.09	5
HMG20A	1.65	1.48	1.62465e-10	2.48599e-09	11.21	20.92	4.55	6.39
NEK9	0.77	1.48	0.000326514	0.00130642	10.52	20.12	5.91	8.33
DTWD1	0.8	1.48	4.44636e-05	0.000222098	8.8	23.07	5	6.11
COPS2	0.99	1.48	5.81637e-08	5.46188e-07	10.76	21.16	3.18	5.83
HIATL2	1.67	1.48	2.41559e-14	7.00647e-13	21.82	29.89	5.91	6.39
CKS2	0.97	1.48	1.11437e-06	8.05956e-06	35.57	124	3.64	6.39
CXorf40B	0.98	1.48	2.93305e-05	0.000153405	24.29	43.63	5.45	9.44
EIF2AK1	1.68	1.47	1.03503e-09	1.37045e-08	47.19	62.2	14.09	14.72
CKAP5	0.91	1.47	4.75591e-05	0.000235653	10.7	31.36	4.55	7.5
SMYD4	0.97	1.47	8.60307e-07	6.39274e-06	11.78	18.47	2.73	4.72
COG7	0.41	1.47	0.00688542	0.0186802	2	8.18	0.91	3.33
PPP2R3C	1.77	1.47	1.15294e-10	1.78883e-09	50.91	73.91	9.55	16.11
RPS6KB1	2.69	1.47	1.02739e-26	1.67842e-24	5.49	15.78	3.18	6.39
SPON2	2.01	1.47	4.64419e-14	1.29629e-12	30.68	56.33	6.82	13.61
RBM7	1.19	1.47	2.58342e-10	3.81132e-09	4.66	8.48	4.55	4.72
RBBP5	1.44	1.47	1.02442e-10	1.60738e-09	16.38	34.06	5.91	7.78
PRRC1	0.9	1.47	3.36375e-06	2.1891e-05	15.67	15.59	4.55	6.39
CHRNB1	0.8	1.47	1.27514e-05	7.29054e-05	19.6	28.05	4.09	5.56
TPRA1	2.12	1.47	1.0498e-15	3.76201e-14	31.6	47.58	6.82	7.78
MZT1	1.36	1.46	5.63708e-14	1.53863e-12	7.78	22.41	0.91	4.44
MRPS6	1.89	1.46	4.75966e-13	1.11082e-11	34.67	51.35	10.45	15.28
FANCI	0.97	1.46	5.81361e-08	5.46188e-07	2.65	10.41	2.27	4.17
GPATCH2L	1.11	1.46	4.91652e-07	3.81942e-06	4.06	6.06	5.91	5.83
GDI2	2.01	1.46	4.01656e-13	9.55649e-12	82.52	93.66	15	19.44
BTN3A3	1.76	1.46	1.01757e-10	1.59889e-09	27.56	36.33	7.27	9.72
MCOLN2	1.84	1.45	8.37888e-12	1.57764e-10	53.95	65.63	10.91	12.78
MEPCE	0.56	1.45	0.0020268	0.00657736	5.35	19.43	1.82	3.61
RGS1	1.69	1.45	1.80638e-09	2.296e-08	387.3	1345.45	33.18	53.33
B3GAT2	0.75	1.45	3.02751e-06	1.99127e-05	0.42	2.62	0.91	2.78
ZNF263	0.48	1.45	0.0126043	0.0312305	6.14	12.64	4.55	5.28
ANKRD35	1.08	1.45	3.49341e-08	3.41022e-07	13.41	20.76	2.27	5.56
ERAP2	1.86	1.45	3.99304e-11	6.72101e-10	49.37	53.58	12.73	18.06
CPSF3L	3.18	1.45	5.37905e-32	1.86737e-29	22.26	38.24	5.45	11.67
CECR5	1.76	1.45	1.84975e-16	7.1599e-15	9.13	32.77	2.27	6.39
RNF122	0.58	1.45	0.000402654	0.00157725	6.04	16.09	11.82	12.78
PILRB	0.8	1.45	2.86966e-06	1.89756e-05	7.73	9.68	3.64	6.39
NDUFAB1	1.72	1.44	3.61744e-11	6.14467e-10	69.96	103.58	8.64	12.5
DHRS1	1.72	1.44	2.73673e-10	4.00557e-09	24.66	47.49	4.55	8.89
GLTSCR1L	0.58	1.44	0.00213009	0.00686287	5.5	16.02	4.55	10
SKP2	1.36	1.44	1.66971e-13	4.21564e-12	10.58	16.35	1.82	5
ZNF83	1.88	1.44	5.35942e-18	2.70626e-16	18.04	16.79	6.82	7.22
MTIF3	1.43	1.44	9.26926e-10	1.23765e-08	71.91	77.5	9.09	8.06
C4orf29	1.58	1.44	4.79212e-11	7.89847e-10	6.56	19.05	6.36	10
GPATCH8	1.95	1.44	4.31363e-14	1.2101e-12	22.21	35.84	11.36	14.17
NCOA3	0.64	1.44	0.00275744	0.00855416	11.45	16.51	10	11.94
TMA16	1.81	1.44	5.53002e-20	3.70078e-18	7.84	27.44	4.09	6.94
GPA33	0.81	1.43	3.30955e-05	0.000170686	22.91	35.14	1.82	3.06
YWHAE	1.71	1.43	2.17491e-10	3.25333e-09	71.46	112.7	19.55	28.06
TMEM41B	1.36	1.43	7.48787e-11	1.20555e-09	19.68	17.87	5	5.56
MAP9	0.86	1.43	4.54283e-07	3.54399e-06	1.5	5.64	0.91	2.78
ADD3	1.67	1.43	1.2666e-09	1.65343e-08	45.97	54.97	11.36	14.72
SCAMP1	1.6	1.43	8.11631e-12	1.5308e-10	3.97	13.3	2.27	6.11
DMTN	0.74	1.43	2.20595e-05	0.00011873	1.86	13.89	0.91	3.61
EFTUD1	0.44	1.43	0.0209492	0.0480417	8.52	17.43	4.55	4.72
RIOK1	0.82	1.42	3.79999e-05	0.000192534	28.77	39.12	4.09	5.56
BRE	1.72	1.42	3.925e-11	6.61652e-10	31.46	58.42	8.64	13.06
PRKRIR	1.22	1.42	1.45777e-07	1.25343e-06	8.15	12.93	8.18	6.11
BPGM	1.47	1.42	9.99744e-12	1.86033e-10	58.64	115.79	5	7.78
RDH10	1.7	1.42	5.34171e-13	1.22353e-11	4.83	21.81	1.82	2.78
B9D2	0.44	1.42	0.004448	0.0129184	29.99	47.95	3.18	2.78
GOSR2	0.9	1.42	4.30807e-06	2.73008e-05	2.65	10.15	4.09	7.5
KIAA0247	1.63	1.41	3.83016e-10	5.4134e-09	18.93	40.81	11.82	17.22
ZNF655	1.69	1.41	2.45182e-09	3.04667e-08	24.92	49.27	11.36	15.83
ZNF540	-0.45	1.41	0.000866362	0.00309766	3.84	16.09	0.91	1.11
SUPT4H1	1.71	1.41	2.46361e-11	4.358e-10	37.08	83.49	6.82	15
GALNT6	0.62	1.41	0.00202415	0.00657108	7.57	16.42	4.09	6.67
SSR2	1.72	1.41	3.12212e-09	3.78642e-08	60.17	118.62	15.91	24.17
OAT	1.93	1.41	6.29769e-13	1.42778e-11	39.56	35.35	3.64	5.28
PQLC1	1.54	1.4	2.74254e-16	1.03983e-14	3.2	7.22	1.82	4.44
TRGV4	1.54	1.4	1.45017e-13	3.70342e-12	52.25	157.8	7.73	13.33
ZNF395	-0.31	1.4	0.0179187	0.0421022	0.39	4.87	1.82	0.83
TRAPPC4	2.22	1.4	5.86074e-16	2.17749e-14	38.88	61.85	10.91	12.78
ATF3	0.79	1.4	5.83361e-06	3.6184e-05	6.52	25.34	2.27	4.72
APOL3	1.64	1.4	2.46926e-09	3.06492e-08	26.58	36.99	8.18	8.61
TCP11L1	1.57	1.4	4.09214e-15	1.31767e-13	7.65	19.02	1.82	4.72
GSAP	0.94	1.4	1.31021e-06	9.33018e-06	4.89	12.51	3.18	5.56
TRIM5	1.56	1.4	1.03075e-09	1.36642e-08	20.25	25.16	9.55	8.89
CD300A	1.61	1.4	2.16369e-09	2.71201e-08	53.23	136.08	5	10
TBRG4	1.32	1.4	2.81173e-08	2.77896e-07	26.23	18.75	5.91	6.39
RB1	1.73	1.4	1.12969e-12	2.4274e-11	22.7	16.87	9.09	10.83
SMARCAL1	0.8	1.4	1.86681e-05	0.000102109	11.94	14.71	2.73	3.61
ELL	-0.4	1.4	0.015446	0.0370605	16.52	20.44	7.27	3.33
SEC24B	1.76	1.4	2.71512e-13	6.62908e-12	10.65	18.1	3.18	5.28
GIMAP2	2.17	1.4	2.53951e-16	9.76175e-15	56.3	96.98	6.82	8.06
CCDC43	1.58	1.39	5.2006e-13	1.19367e-11	5.24	16.37	2.27	5.56
EYA3	1.67	1.39	4.41126e-10	6.16411e-09	28.51	45.59	10.45	12.22
TBX21	1.77	1.39	5.70226e-12	1.10168e-10	41.01	76.29	7.27	11.39
NR4A3	0.64	1.39	3.00521e-05	0.000156663	2.16	5.05	2.27	3.33
MAPKAPK3	1.25	1.39	9.03021e-06	5.34452e-05	35.74	106.64	5.45	11.94
DDX54	1.56	1.39	3.20726e-10	4.61521e-09	7.75	14.66	6.36	5.28
EBNA1BP2	1.61	1.39	2.76179e-10	4.03694e-09	20.59	29.06	6.36	6.67
SRF	0.52	1.39	0.000822673	0.002963	2.28	12.93	0.91	2.78
RNF41	1.66	1.39	1.67904e-10	2.56568e-09	29.85	32.63	3.64	5.56
SREK1IP1	1.65	1.39	1.07939e-10	1.68413e-09	13.42	17.7	9.55	11.94
KIAA0586	0.48	1.39	0.00675573	0.0183899	15.58	12.42	5.45	5.83
HIVEP1	0.64	1.38	0.000157355	0.000682836	3.47	5.9	2.27	3.61
TOMM20	1.57	1.38	4.96282e-10	6.90012e-09	15.21	44.6	7.73	13.61
ZNF250	1.48	1.38	4.45894e-13	1.04724e-11	12.82	15.52	2.27	5.83
GCDH	1.55	1.38	4.94898e-16	1.84491e-14	17.27	32.73	3.18	3.61
UBE3B	0.79	1.38	0.000561162	0.00210408	8.1	18.87	4.55	7.22
ATG4A	0.56	1.38	0.00184811	0.00608495	18.3	32.3	2.73	3.89
TRBV4-1	-0.42	1.38	0.00482399	0.0138047	136.06	294.53	2.27	1.94
PLCH2	0.66	1.38	0.000360673	0.00142639	4.96	7.84	3.64	5
SPAG16	0.8	1.38	1.00125e-05	5.86959e-05	3.78	10.11	2.27	3.33
MED13L	0.44	1.38	0.00981361	0.0252243	1.69	2.71	3.18	3.33
GBP4	1.66	1.38	8.01492e-09	8.92162e-08	36.48	63.43	10.45	13.06
DYNC1LI2	1.25	1.38	6.00733e-10	8.24912e-09	7.72	12.76	3.64	6.39
MRPS28	1.43	1.37	2.45113e-13	6.01096e-12	12.05	16.43	2.73	6.94
B3GAT3	1.72	1.37	8.02881e-11	1.28334e-09	57.55	82.31	10.91	11.94
CIAPIN1	1.7	1.37	1.97611e-10	2.97461e-09	29.64	46.67	3.64	7.22
ARRDC1	2.53	1.37	2.80604e-23	2.75861e-21	36.87	73.34	5.91	12.22
TIMM44	1.28	1.37	1.96713e-10	2.96708e-09	10.5	23.81	5	7.78
FCGR3A	1.57	1.37	7.33528e-10	9.92541e-09	77.52	274.38	5.91	15.28
CD226	1.61	1.37	2.35926e-10	3.51328e-09	18.13	50.93	6.82	11.67
EXOSC7	1.69	1.37	4.88343e-13	1.13494e-11	11.19	34.34	3.18	7.5
MVD	1.19	1.37	3.43198e-06	2.22828e-05	23.91	40.77	7.73	11.94
PEMT	-0.48	1.37	0.00506311	0.0143705	31.82	46.43	3.64	3.33
MAVS	0.62	1.37	0.00317517	0.00965854	20.56	34.53	3.64	6.11
ZSCAN16	0.66	1.37	0.000117473	0.000526215	7.88	32.78	0.91	2.78
PPP1R10	1.51	1.37	1.04339e-08	1.13526e-07	12.52	36.65	7.27	8.06
PSEN1	0.8	1.36	4.29244e-05	0.000215184	7.58	10.77	5.45	3.89
NPRL2	1.67	1.36	9.61032e-09	1.05495e-07	72.51	200.55	6.36	15
SLC27A5	0.9	1.36	1.3298e-08	1.40827e-07	4.19	2.52	3.18	3.06
LMF1	0.63	1.36	4.34884e-05	0.000217794	1.45	3.56	0.91	2.78
COQ3	0.62	1.36	0.000125904	0.000559691	17.36	49.78	1.36	2.78
KAT6B	1.22	1.36	2.35487e-07	1.94644e-06	11.4	13.35	9.55	8.33
CASP7	0.66	1.36	0.00106871	0.00374048	26.92	40.51	4.09	6.39
PATZ1	-0.38	1.36	0.00403943	0.0119314	3.56	7.36	2.27	1.67
RXRB	1.03	1.36	3.63768e-07	2.89893e-06	14.74	24.04	4.09	8.06
LIN37	0.6	1.36	0.000185999	0.000793056	4.1	16.13	2.27	5
KIAA1328	0.47	1.36	0.00404552	0.0119399	3.93	4.32	3.64	3.89
RTCA	1.74	1.36	2.66979e-10	3.92311e-09	41.27	75.58	8.64	10.28
PGS1	1.62	1.36	8.08746e-10	1.08376e-08	23.84	26.79	6.36	6.11
NTPCR	0.67	1.36	0.000364803	0.00143964	3.4	8.07	3.64	6.11
ATP6V1D	1.74	1.36	4.98527e-10	6.91402e-09	41.5	71.06	7.73	10.28
CSRP1	1.97	1.36	2.14766e-13	5.30186e-12	17.59	21.91	6.82	10.56
VPS51	1.11	1.36	2.75658e-06	1.83261e-05	28.82	37.78	9.55	10
DDX59	1.94	1.36	1.68759e-20	1.17172e-18	11.57	26.88	2.73	6.11
COLGALT1	1.86	1.36	7.56298e-18	3.73409e-16	20.44	27.31	5	8.33
EPB41L5	-0.76	1.36	4.20568e-07	3.30417e-06	0.72	8.7	1.36	1.11
BLOC1S6	1.95	1.36	2.76349e-17	1.22309e-15	7.21	15.22	5	7.78
RNF14	0.82	1.35	4.19307e-05	0.000210678	13.11	25.99	3.18	5.28
RNF141	0.71	1.35	2.42651e-05	0.000129348	3.58	5.36	1.82	2.78
PNPLA2	0.89	1.35	9.34897e-06	5.50385e-05	13.15	13.43	5.45	7.22
RIT1	1.57	1.35	9.99361e-11	1.57474e-09	20.39	28.43	2.73	5.28
MAK16	1.43	1.35	1.24946e-13	3.25828e-12	0.57	5.52	0.91	2.22
MAPKAPK5	1.91	1.35	8.77507e-21	6.49882e-19	10.5	18.05	4.09	6.67
METTL2B	0.93	1.35	3.697e-08	3.59003e-07	1.42	4.45	2.27	4.44
AAMDC	0.39	1.34	0.0094779	0.0244747	0.22	6.56	1.36	2.78
ACSS1	2.89	1.34	3.19021e-32	1.14323e-29	16.33	25.01	5.45	9.17
TRAPPC6B	1.43	1.34	2.81954e-11	4.90944e-10	22.1	36.57	4.09	6.94
SPG7	1.59	1.34	1.53184e-10	2.35369e-09	9.53	29.27	10	10.56
UQCR11.1	1.47	1.34	1.7252e-11	3.10619e-10	57.3	86.72	42.27	45.83
AHSA1	1.61	1.34	3.16834e-09	3.82577e-08	54.17	125.54	11.36	15.28
PIK3C2B	0.46	1.34	0.00167856	0.00557961	1.42	0.98	1.82	1.67
RNF126	1.58	1.34	3.64941e-10	5.17768e-09	18.76	39.22	7.73	10.83
CD81	1.78	1.34	2.05167e-11	3.67612e-10	24.25	22.98	6.82	8.33
FLI1	1.64	1.34	1.48366e-10	2.28598e-09	18.6	15.42	9.09	8.61
UFL1	1.65	1.34	1.44104e-09	1.87016e-08	32.83	50.05	10.91	10.56
ZNF827	0.58	1.34	0.0011028	0.00384648	8.49	13.46	4.09	7.22
LTA	1.29	1.34	1.35803e-11	2.50189e-10	33.13	37.55	2.27	3.06
TOB2	1.55	1.34	1.3569e-09	1.76508e-08	27.22	34.98	9.09	11.67
BRIX1	1.57	1.34	2.23622e-09	2.7944e-08	12.44	28.83	5.45	9.44
CROT	-0.58	1.34	0.000212417	0.000890804	2.5	10.03	2.73	1.94
DECR1	1.9	1.34	2.99177e-13	7.24086e-12	42.17	73.46	14.55	13.61
AKAP8	2.75	1.33	4.21231e-29	8.99894e-27	17.87	31.97	3.64	8.33
IDNK	0.96	1.33	2.8313e-06	1.87667e-05	24.96	50.28	4.09	6.39
RBM42	1.58	1.33	7.74303e-09	8.64496e-08	79.81	163.04	11.36	20.28
PHLPP2	0.67	1.33	4.24054e-05	0.00021287	0.25	4.43	0.45	2.78
NIT2	0.77	1.33	0.00027958	0.00113684	23.78	35.27	6.36	6.11
CCR1	1.57	1.33	4.00399e-11	6.72924e-10	28.6	50.31	4.09	5.83
LCMT1	2.9	1.33	1.28387e-30	3.47866e-28	54.23	112.78	5.45	9.44
GLDC	0.73	1.33	3.5724e-05	0.0001828	5.44	17.84	1.82	3.61
MED25	0.44	1.33	0.0101305	0.0259367	2.81	5.85	3.18	4.17
TSR1	0.9	1.33	2.45726e-07	2.02355e-06	5.71	10.62	2.73	4.44
KLHL26	0.56	1.32	0.00020283	0.000854471	0	5	0	1.39
ATP6V1C1	1.7	1.32	2.0075e-11	3.6028e-10	6.73	15.22	2.73	5.56
PTPN18	1.55	1.32	9.73304e-09	1.06526e-07	16.06	32.26	5.45	9.72
UAP1L1	0.36	1.32	0.0217701	0.0496396	13.28	20.93	4.09	2.22
MAN2C1	1.5	1.32	2.97142e-09	3.61629e-08	6.93	18.53	2.73	7.78
MTX2	0.86	1.32	1.35517e-06	9.6257e-06	27.36	45.35	1.36	2.78
UCHL5	1.88	1.32	1.50348e-11	2.73806e-10	29.68	31.5	11.82	9.17
ANKDD1A	0.92	1.32	5.96029e-07	4.56641e-06	6.12	10.01	4.55	6.39
PDCD5	1.53	1.32	8.52405e-09	9.44105e-08	53.96	111.76	10.91	16.11
PIAS3	0.81	1.32	3.267e-05	0.000168962	24.01	19.76	5	4.17
PGBD2	0.41	1.31	0.0119516	0.0298561	14.09	21.14	1.36	5.28
VTA1	1.58	1.31	1.84212e-08	1.89132e-07	25.01	39.05	8.18	10.28
RRAGC	1.98	1.31	2.86137e-22	2.38999e-20	10.24	15.43	3.18	5.56
LPGAT1	0.84	1.31	8.38513e-06	5.0054e-05	4.91	11.77	1.82	4.44
DDX21	1.57	1.31	4.54001e-10	6.33605e-09	17.76	33.27	8.64	16.94
C8orf76	0.85	1.31	9.57185e-08	8.58222e-07	2.51	12.65	1.36	4.17
ZNF354A	0.6	1.31	0.00828388	0.0218692	27.12	31.48	5.91	5.28
NCAPH2	1.14	1.31	2.25163e-09	2.81049e-08	26.12	46.78	3.64	4.44
PPWD1	2.16	1.31	9.7999e-18	4.65244e-16	29.85	39.27	5.45	9.72
BIVM	0.61	1.31	0.000334298	0.00133395	3.4	4.39	2.27	3.61
CDK16	2.01	1.31	1.08209e-23	1.15586e-21	11.65	14.06	3.18	4.72
HIF1AN	1.63	1.31	3.68613e-09	4.39369e-08	9.18	21.37	5.91	7.5
KCTD20	1.6	1.31	7.81527e-10	1.04982e-08	10.94	21.19	8.18	9.17
PRKD2	1.55	1.31	1.55215e-08	1.62362e-07	37.48	55.98	10.91	15.56
PDE7A	1.11	1.31	1.049e-06	7.62657e-06	15.66	24.79	10.45	8.61
WDR34	0.59	1.31	0.00114201	0.00397077	14.15	35.77	2.27	3.61
PRKD3	1.48	1.31	2.73285e-09	3.3509e-08	4.34	12.78	4.55	9.17
COPS8	1.69	1.31	3.48867e-09	4.18528e-08	36.06	84.83	6.82	11.67
NCOA5	1.59	1.31	2.75534e-11	4.81275e-10	25.24	31.11	8.64	6.94
RTP4	1.38	1.31	8.57755e-12	1.6096e-10	35.1	83.05	2.73	5.56
ADPRM	0.42	1.31	0.00446832	0.0129672	0	17.45	0	1.94
ADAMTSL5	0.8	1.3	6.70803e-07	5.08319e-06	3.94	3.8	1.36	1.11
USP9Y	1.48	1.3	1.78434e-09	2.27058e-08	8	16.08	11.82	8.06
UBE2W	1.13	1.3	4.37262e-07	3.42563e-06	12.41	17.03	8.18	9.44
TRGV3	1.56	1.3	1.06544e-09	1.4057e-08	244.81	298.23	8.18	15.83
GPI	1.57	1.3	2.18875e-08	2.21033e-07	34.48	57.7	15.45	22.5
YDJC	1.48	1.3	8.59785e-08	7.78431e-07	84.19	212	9.09	15.83
PDLIM5	0.8	1.3	1.67717e-05	9.29261e-05	3.84	6.02	2.27	5.83
OTUD3	0.59	1.3	9.31037e-05	0.000427923	3.25	11.68	1.36	3.06
PPP1R7	1.52	1.29	3.17975e-08	3.126e-07	36.14	60.39	9.09	13.61
ZNF740	0.82	1.29	1.17903e-07	1.03869e-06	7.46	7.19	1.36	1.67
SYNJ2	0.58	1.29	0.00102036	0.00359275	3.22	5.2	2.73	2.78
ATAD1	1.62	1.29	7.67116e-09	8.58197e-08	33.03	39.69	9.55	9.44
PCED1B	1.52	1.29	1.79986e-08	1.85651e-07	90.75	176.87	25.45	25.56
EP400	1.36	1.29	3.28059e-12	6.55469e-11	5.6	7.4	3.18	6.94
OCIAD1	1.6	1.29	8.91074e-09	9.82038e-08	46.44	75.06	11.82	18.06
FRA10AC1	1.03	1.29	1.76414e-06	1.2287e-05	7.69	14.02	6.36	9.17
PLCXD2	0.62	1.29	0.000291918	0.00118139	3.27	17.83	1.36	3.89
GPKOW	0.41	1.29	0.00406525	0.0119917	14.96	35.41	1.82	3.61
RREB1	1.37	1.29	1.13668e-10	1.76853e-09	1.08	3.8	4.09	8.33
ZNF614	0.4	1.29	0.00498577	0.0141782	5.49	6.84	0.91	1.39
RRAGA	1.68	1.29	9.45186e-10	1.26051e-08	111.84	118.68	7.73	7.22
EIF4G3	1.46	1.28	6.89801e-09	7.79553e-08	10.64	15.22	11.36	10.28
BCOR	1.62	1.28	1.75169e-10	2.66204e-09	12.48	18.96	6.82	6.39
TSSC1	1.5	1.28	1.52264e-09	1.96915e-08	10.63	15.95	3.64	6.39
UTP6	1.51	1.28	7.54731e-11	1.2116e-09	14.92	31.03	5	8.06
B3GNTL1	0.82	1.28	7.89256e-05	0.00037089	11	10.16	5	5.56
CEP192	0.9	1.28	2.09023e-06	1.42895e-05	4.93	6.96	4.09	5
PDK3	2.36	1.28	8.9923e-25	1.10995e-22	53.57	51.54	3.64	6.11
SELL	1.37	1.28	1.64205e-06	1.15088e-05	108.03	138.58	6.36	10
COPS3	1.9	1.28	2.71895e-12	5.49178e-11	76.87	80.88	7.27	8.61
CYP2R1	1.53	1.28	5.97145e-14	1.62193e-12	18.33	28.27	4.09	5.56
OGG1	1.39	1.28	3.08961e-08	3.04548e-07	11.53	11.69	5.45	8.06
HAUS3	1.66	1.28	1.70605e-11	3.0767e-10	13.72	11.9	8.18	8.33
GPHN	0.6	1.28	8.47726e-05	0.000394775	0.66	3.52	1.36	2.22
CCDC71L	0.34	1.28	0.021221	0.0485569	0.04	3.96	0.91	1.67
C12orf10	1.58	1.28	1.04404e-12	2.26971e-11	29.89	60.01	4.09	5.83
ACADSB	1.02	1.28	9.03995e-07	6.66389e-06	20.2	17.97	4.55	5.56
TAOK1	1.54	1.28	3.70438e-10	5.24898e-09	3.72	6.86	9.55	9.44
C1orf159	1.47	1.27	8.0286e-14	2.13372e-12	7.98	19.22	3.18	4.17
ATP8B2	0.8	1.27	3.80143e-06	2.44246e-05	4.68	8.84	4.55	4.44
CCAR2	1.57	1.27	1.51459e-10	2.33041e-09	14.88	17.58	7.73	11.11
TOR1AIP1	1.61	1.27	3.53914e-09	4.24124e-08	20.42	32.4	12.73	15.83
MTHFSD	0.72	1.27	2.18584e-05	0.000117876	4.98	10.4	1.82	1.94
COMMD2	1.11	1.27	9.31689e-06	5.49662e-05	22.1	30.8	8.18	8.61
PPP1R18	1.41	1.27	5.05544e-08	4.79597e-07	60.67	104.59	33.64	40.56
LPP	0.75	1.27	0.00232	0.00739749	3.67	6.04	5.45	8.33
KIR2DS4	0.54	1.27	0.00691889	0.0187468	4.43	54.29	0.91	5
ENC1	0.34	1.27	0.0214921	0.0491166	1.84	11.66	0.45	1.11
HBS1L	1.54	1.27	6.09427e-09	6.99393e-08	10.84	19.06	12.27	13.89
UBE2G1	1.53	1.27	2.60078e-08	2.58658e-07	23.33	48.66	7.27	10.28
ZNF226	0.62	1.27	0.00232263	0.00740376	13.91	19.5	5.45	4.72
OSBPL2	2.18	1.27	4.61168e-17	1.9857e-15	34.16	38.94	7.73	6.94
MTCH2	1.7	1.27	3.75612e-09	4.46753e-08	79.32	98.68	9.09	9.72
HIPK1	1.16	1.27	3.80932e-07	3.01623e-06	20.85	21.02	11.36	10.56
ARFIP2	1.42	1.27	9.94748e-10	1.32185e-08	30.2	46.48	5.45	6.67
ATOX1	1.34	1.27	3.14303e-12	6.29116e-11	8.88	9.74	3.64	6.94
ZDHHC13	0.78	1.27	4.68979e-05	0.000232745	12.2	12.79	3.64	4.17
TIMM23	1.64	1.26	4.58546e-11	7.60297e-10	61.4	83.23	10.45	14.17
CCDC174	1.22	1.26	2.9676e-06	1.95767e-05	38.82	69.2	9.55	10.56
SF3B4	1.46	1.26	9.78854e-08	8.76236e-07	54.58	113.55	10.91	16.67
PA2G4	1.48	1.26	3.4517e-08	3.37247e-07	49.98	76.17	17.27	24.17
QPCT	0.45	1.26	0.00552141	0.0154502	11.82	13.26	1.36	1.94
TULP4	0.44	1.26	0.00813078	0.0215008	4.53	6	4.55	5.28
SLC35E3	-0.5	1.26	0.00247341	0.00781931	8.9	11.01	3.64	3.06
RASA1	0.64	1.26	0.0048391	0.0138336	13.06	21.35	10.45	10.83
THADA	1.6	1.26	2.60058e-10	3.83155e-09	6.38	8.67	6.82	6.11
PELO	1.5	1.26	8.63135e-09	9.53824e-08	15.73	22.46	4.55	5.83
TM2D3	1.55	1.26	2.5389e-08	2.53183e-07	23.25	27.67	8.64	7.78
HELZ	1.55	1.26	1.5677e-08	1.63527e-07	12.16	19.32	12.73	16.94
TRAV8-4	1.02	1.26	1.39147e-07	1.20201e-06	201.35	144	3.18	4.17
ALG8	1.4	1.26	3.65322e-11	6.19597e-10	27.48	31.15	4.55	5.83
NCDN	1.46	1.26	1.63931e-13	4.14832e-12	11.92	15.94	4.09	5.83
MKI67IP	1.48	1.26	1.22658e-08	1.31399e-07	52.83	76.89	11.82	11.94
C20orf194	0.75	1.26	0.000287225	0.00116452	7.19	11.32	8.64	10
SOD2	1.09	1.26	1.05344e-08	1.14508e-07	2.25	4.14	2.73	6.11
MCCC2	0.98	1.26	3.33341e-06	2.1719e-05	12.79	11.93	3.64	4.72
POLDIP3	2.4	1.26	9.03546e-19	5.09517e-17	30.34	70.6	6.36	10
NCAPD2	0.78	1.26	2.15933e-05	0.000116616	5.36	8.66	4.09	5.83
DIS3L	0.5	1.26	0.00537773	0.0151073	19.17	20.16	4.55	5
MRPL52	1.44	1.26	1.25088e-08	1.33616e-07	29.84	56.46	12.73	16.94
ARHGEF18	0.45	1.26	0.00321813	0.00976247	2.95	4.36	2.73	3.06
MRPS9	0.51	1.25	0.0178865	0.0420532	54.33	56.29	5.91	6.39
ZNF28	0.46	1.25	0.00567968	0.0158213	5.38	11.47	5.45	2.78
TBC1D10B	0.55	1.25	0.000823626	0.00296489	6.2	11.13	2.27	3.33
D2HGDH	1.52	1.25	1.95623e-09	2.46952e-08	19.78	20.34	6.82	5.56
C17orf89	1.57	1.25	4.96958e-10	6.90089e-09	56.13	123.76	6.82	9.17
AP3M1	1.41	1.25	1.10962e-08	1.20027e-07	24.76	56.67	6.36	10.83
STRN3	1.55	1.25	6.75718e-09	7.66758e-08	26.07	41.76	8.64	12.78
CD2BP2	1.49	1.25	1.56887e-07	1.3386e-06	58.13	103.43	10.45	17.5
HCCS	1.25	1.25	1.352e-13	3.48478e-12	22.07	42.58	2.27	4.44
CPQ	0.41	1.25	0.0201467	0.0464722	12.9	33.7	3.64	4.44
RAD17	1.13	1.25	9.90009e-09	1.08248e-07	16.58	19.73	4.09	5.28
DTNBP1	1.47	1.25	5.10145e-08	4.8355e-07	39.94	72.15	9.09	11.94
FOXJ3	0.81	1.25	0.000188857	0.000803529	13.62	19.83	6.82	6.11
ZCCHC7	1.45	1.25	1.19171e-07	1.04819e-06	26.48	68.97	6.82	10.56
NUGGC	0.66	1.24	2.98263e-05	0.000155632	9.76	9.74	3.18	3.89
USO1	1.09	1.24	1.80534e-08	1.86044e-07	13.93	27.37	5.91	6.11
RELL1	0.81	1.24	2.28443e-06	1.5446e-05	1.8	18.26	0.91	4.17
SDCBP	1.53	1.24	7.9609e-08	7.29082e-07	59.01	103.87	19.09	17.78
EVI2A	1.48	1.24	6.28777e-09	7.1863e-08	45.97	73.76	10.45	16.11
NDUFB10	1.49	1.24	8.85627e-08	7.9728e-07	280.71	503.76	24.09	26.94
PRKACA	0.65	1.24	2.48694e-05	0.000132315	0.54	4.71	1.82	2.22
ZBTB8OS	1.51	1.24	4.03511e-09	4.7738e-08	40.9	48.2	9.55	12.5
ATG7	0.79	1.24	3.66854e-05	0.000186944	13.21	11.44	4.55	5.83
TIPARP	1.76	1.24	4.58613e-18	2.33703e-16	15.04	34.08	2.27	6.67
PPP2R2B	1.67	1.24	1.94304e-10	2.93677e-09	40.32	31.53	11.36	12.22
FAM73B	1.08	1.24	2.15943e-07	1.80099e-06	20.03	19.1	4.09	6.94
PBX4	1.66	1.24	4.56171e-11	7.57489e-10	53.76	52.19	7.27	9.17
NPM1	1.47	1.24	6.74561e-08	6.2604e-07	159.82	273.71	33.64	45.83
NSL1	1.05	1.24	4.76146e-07	3.70797e-06	14.49	24.89	4.55	5
TXNDC9	2.26	1.23	7.28015e-19	4.16882e-17	34.12	45.65	5.91	8.06
HVCN1	1.51	1.23	6.39872e-12	1.22769e-10	10.69	20.46	5	5.83
LRRC61	0.42	1.23	0.0200279	0.0462623	6.81	35.56	2.27	4.17
PBDC1	1.51	1.23	1.62585e-08	1.69116e-07	98.54	189.47	6.36	8.61
RABL6	0.52	1.23	0.00683544	0.0185615	2.14	6.97	4.55	7.22
FAM210B	0.79	1.23	3.15886e-06	2.07031e-05	14.23	18.44	3.18	3.33
RRP9	0.71	1.23	0.00018707	0.000796535	22.66	34.69	2.73	2.78
MANBA	-0.43	1.23	0.0187191	0.0436505	7.19	8.27	4.09	3.61
POMP	1.46	1.23	2.46333e-08	2.46533e-07	223.26	355.31	28.64	34.72
COPRS	1.67	1.23	9.15099e-19	5.10846e-17	15.92	54.25	1.82	4.17
HOXB2	1.59	1.23	1.73208e-10	2.63946e-09	30.92	32.08	11.36	9.72
BTBD1	1.46	1.23	1.53765e-11	2.79114e-10	20.59	20.15	8.18	8.89
RTTN	0.78	1.23	8.9337e-07	6.61189e-06	1.77	6.38	1.36	2.78
HERC4	1.46	1.23	1.32578e-08	1.40535e-07	8.36	8.58	11.36	10.56
CEP104	1.32	1.23	3.69871e-07	2.94545e-06	8.45	19.23	3.18	7.22
GANAB	1.19	1.23	1.20556e-07	1.05703e-06	15.62	37.48	5.45	8.61
IFIT2	0.77	1.23	0.000548483	0.00206406	44.3	90.13	3.64	5.28
ZNF746	0.65	1.23	2.50684e-05	0.000133246	1.81	4.71	4.55	3.33
MAP4K4	1.1	1.23	3.04205e-10	4.40028e-09	1.74	3.69	1.82	3.33
PARVB	1.11	1.23	6.77528e-09	7.67737e-08	1.16	4.98	1.36	6.94
CNOT7	1.64	1.23	3.09839e-09	3.76175e-08	37.78	40.13	10	12.5
HN1	1.47	1.23	1.47805e-07	1.26988e-06	70.83	91.88	14.55	17.78
LEMD3	1.39	1.23	1.10716e-08	1.19877e-07	13.03	16.47	4.55	5.28
ARID3B	1.51	1.22	1.31679e-09	1.71693e-08	11.77	13.72	5.45	7.5
NUFIP1	0.86	1.22	1.20321e-07	1.05606e-06	2.88	9.55	0.45	2.78
NFKBIZ	1.39	1.22	3.89783e-08	3.77187e-07	12.94	25.43	6.82	12.5
TMA7	1.36	1.22	4.70555e-11	7.77886e-10	51.3	92.16	42.27	54.17
MED12	0.48	1.22	0.0179074	0.0420846	10.64	16.56	5.45	5.83
SYAP1	1.41	1.22	5.9712e-08	5.59309e-07	15.23	37.78	10.91	16.11
SETX	1.43	1.22	8.99958e-07	6.64736e-06	40.49	70.76	20	25.28
RQCD1	1.43	1.22	4.0481e-07	3.19165e-06	63.33	109.17	18.64	22.78
EXOC1	1.37	1.22	8.20627e-08	7.497e-07	16.4	38.27	8.18	10.28
PJA1	0.95	1.22	2.36324e-08	2.37371e-07	6.89	14.71	1.36	2.5
BUD31	1.46	1.22	7.94761e-09	8.85557e-08	70.99	95.81	18.18	25.83
BFAR	0.61	1.22	0.00449755	0.0130384	30.07	34.4	8.18	7.22
RPL7L1	2.35	1.22	6.85209e-20	4.53094e-18	18.23	25.16	7.73	11.39
ZNF789	2.17	1.21	1.7786e-24	2.14766e-22	1.19	9.88	2.73	3.89
RSRC2	1.4	1.21	2.76089e-07	2.25354e-06	29.81	47.56	13.64	21.39
PROK2	-0.6	1.21	1.32503e-05	7.53316e-05	3.42	18.06	0.45	0.83
SLC39A11	1.63	1.21	4.9026e-13	1.13701e-11	10.01	6.56	3.18	4.44
ABCC1	0.65	1.21	0.000947925	0.00336731	8.67	11.86	8.64	7.5
SLC25A29	0.42	1.21	0.0205639	0.0472775	9.14	7.43	2.27	2.5
ZMPSTE24	2.17	1.21	5.34127e-23	5.07147e-21	19.23	36.3	5	8.89
ZNF675	0.59	1.21	0.00153664	0.00516506	14.01	12.62	3.18	3.89
ANKH	1.23	1.21	1.0604e-09	1.40072e-08	5.22	9.66	6.36	8.61
REEP4	2.13	1.2	8.59209e-22	6.91663e-20	32.99	56.97	5.91	7.5
SCUBE1	-0.38	1.2	0.00919888	0.023921	1.04	0.44	2.27	1.67
SNX29	-0.57	1.2	0.000746779	0.00271465	4.12	6.49	4.09	4.17
SLC12A9	0.58	1.2	0.000321331	0.00128822	3.01	3.64	1.82	3.33
ZNF397	-0.56	1.2	0.000198182	0.000838097	7.3	13.21	2.73	2.78
TMEM261	2.17	1.2	2.84335e-22	2.38999e-20	29.87	41.07	5	7.5
BANP	1.14	1.2	1.39879e-08	1.47151e-07	6.76	16.61	4.55	10
FAHD1	1.06	1.2	4.03157e-05	0.000203299	29.92	33.45	4.09	4.17
CDC25B	1.44	1.2	3.43962e-07	2.75294e-06	56.54	105.96	15	16.11
ACACA	0.78	1.2	2.49287e-06	1.67533e-05	2.62	2.28	2.27	3.33
SYNE3	1.04	1.2	3.53e-10	5.01467e-09	2.78	3.96	1.36	2.5
USP24	1.46	1.2	1.33355e-09	1.73675e-08	7.6	11.98	7.27	7.5
TOMM7	1.4	1.2	1.49555e-07	1.28344e-06	156.25	243.88	22.73	27.78
IFT57	0.62	1.2	0.000473815	0.00182321	14.03	22.57	3.18	3.06
POU2F2	1.83	1.2	9.68648e-14	2.54993e-12	8.86	10.63	6.36	7.5
SMARCE1	1.39	1.2	1.053e-07	9.36567e-07	11.82	20.48	13.64	19.72
LARP4	2.19	1.2	1.37443e-22	1.21179e-20	11.28	22.01	3.18	6.94
AFF1	2.17	1.2	9.7784e-22	7.81498e-20	6.93	16.64	4.09	9.17
TADA2B	1.11	1.2	8.52234e-12	1.60194e-10	5.91	4.61	0.45	3.06
UHMK1	2.09	1.2	1.81641e-18	9.74806e-17	11.78	24.21	6.82	8.33
GPATCH1	0.76	1.2	5.61411e-06	3.49396e-05	5.62	20.16	2.27	4.72
FAM206A	1.55	1.2	9.98708e-09	1.09092e-07	44.7	52.29	4.55	5.56
EIF4E	1.09	1.2	2.9816e-05	0.000155632	10.39	14.42	9.55	12.78
PLCE1	0.51	1.19	0.000967647	0.00342894	1.66	2.56	1.36	1.94
RAP1A	1.55	1.19	1.11531e-08	1.20525e-07	24.95	35.91	8.18	11.67
C1orf109	0.88	1.19	1.2007e-06	8.63338e-06	6.92	13.44	1.82	2.5
PHLDA1	1.4	1.19	1.7179e-08	1.77693e-07	15.52	42.48	14.09	27.22
SLC6A6	1.33	1.19	7.24197e-08	6.67643e-07	11.55	14.21	10.45	7.22
TPM4	1.38	1.19	7.11634e-07	5.35606e-06	74.61	114.64	26.36	32.78
TNFSF12	0.73	1.19	0.000128748	0.000570735	7.16	13.02	4.09	6.11
TMEM120B	0.56	1.19	0.00183885	0.00606151	2.12	4.31	3.18	6.11
ZBTB32	1.26	1.19	5.50272e-08	5.19708e-07	12.79	23.47	1.82	3.61
SENP1	1.02	1.19	2.34461e-06	1.5824e-05	21.56	17.28	5.45	5.28
GZMB	1.38	1.19	1.79609e-08	1.85435e-07	6425.32	12472.3	60.91	77.5
LANCL1	1.35	1.19	8.59138e-11	1.36932e-09	3.37	7.23	2.27	4.72
HAUS6	1.25	1.19	2.59672e-08	2.58485e-07	5.59	13.09	2.73	3.33
HSPB1	1.32	1.19	1.16019e-08	1.2501e-07	34.75	57.87	11.82	13.06
PLSCR1	1.5	1.19	8.69721e-08	7.84265e-07	54.66	103.76	14.09	18.06
GFI1	1.71	1.19	6.53578e-12	1.25183e-10	19.8	25.86	3.64	5.28
TMEM154	1.6	1.18	7.08231e-10	9.61826e-09	12.24	17.04	8.64	10.83
SOAT1	1.09	1.18	1.29616e-07	1.13111e-06	11.17	17.94	6.82	8.06
PROSC	1.37	1.18	6.87589e-07	5.19904e-06	52.3	82.51	9.55	13.06
PHF20L1	1.37	1.18	8.33226e-07	6.21229e-06	11.03	16.27	13.64	16.67
HINFP	0.39	1.18	0.0152924	0.0367713	4.92	5.32	2.27	2.5
ARF6	1.38	1.18	1.62153e-08	1.68825e-07	193.14	298.7	40	49.72
OAS1	1.57	1.18	2.5013e-08	2.4981e-07	64.67	132.83	10.45	14.44
SDHC	1.42	1.18	5.68934e-08	5.36072e-07	44.08	90.79	5	8.89
CDKL1	0.86	1.18	0.000104288	0.000473837	12.79	26.84	5.45	5.56
AGK	1.41	1.18	1.03852e-07	9.25918e-07	16.42	27.42	5	7.5
PIAS1	1.58	1.18	6.955e-09	7.85194e-08	56.7	45.28	12.27	9.17
FYTTD1	1.47	1.18	6.70071e-08	6.22393e-07	21.98	32.43	11.82	16.11
EEF1E1	1.29	1.18	2.89821e-10	4.21417e-09	7.45	14.91	5.45	8.61
GBE1	0.48	1.18	0.00853038	0.0224347	10.66	10.25	2.27	2.5
DRAXIN	1.18	1.18	5.07313e-10	7.00963e-09	6.32	14.24	3.18	4.44
RFC5	0.76	1.18	2.22328e-05	0.000119605	11.12	40.21	1.82	4.44
RNF144A	1.03	1.18	1.00689e-09	1.33638e-08	2.04	7.47	1.82	3.06
CHCHD7	1.61	1.18	6.12654e-09	7.02371e-08	37.54	38.76	7.73	11.11
CTSH	1.61	1.18	1.57635e-09	2.03388e-08	15.11	24.39	5	5.28
TOP2A	0.39	1.18	0.00961405	0.0247744	1.38	4.45	0.91	3.06
ANGEL1	0.98	1.18	3.98308e-09	4.71777e-08	5.43	7.41	1.82	1.94
METTL7A	0.4	1.17	0.0120522	0.0300514	1.28	6.23	0.45	1.67
DPM2	1.4	1.17	9.94061e-07	7.27367e-06	72.46	112.9	8.64	14.44
ZNRD1	1.37	1.17	1.2334e-07	1.08059e-06	25.88	39.16	8.18	11.67
ZC3H14	1.65	1.17	4.96845e-14	1.37986e-12	9.19	15.22	5.45	6.94
KDM8	0.34	1.17	0.0150425	0.036296	2.92	4.71	0.91	1.67
HAUS5	2.47	1.17	3.75534e-21	2.83796e-19	28.97	36.73	7.27	10.28
INIP	2.52	1.17	7.38636e-23	6.95382e-21	29.62	30.87	3.64	8.33
TRIM25	1.3	1.16	9.19115e-08	8.26088e-07	8.1	18.52	3.64	8.89
RIOK3	1.48	1.16	3.84771e-08	3.72986e-07	40.3	41.26	11.36	12.78
RIPK1	1.25	1.16	1.14911e-07	1.01555e-06	35.07	38.06	11.82	10
TRDV1	1.14	1.16	1.46639e-06	1.03495e-05	238.35	320.62	5.91	6.67
PTPN11	1.35	1.16	5.27749e-07	4.07136e-06	19.69	42.11	10	15
STUB1	1.34	1.16	5.50631e-08	5.19708e-07	39.19	56.31	10	15.28
MKI67	0.76	1.16	1.54254e-05	8.63278e-05	5.11	7.12	1.36	3.61
ATG16L1	1.22	1.16	1.88386e-08	1.92705e-07	18.8	28.01	5.45	6.94
APBA2	0.64	1.16	0.000474506	0.00182524	3.77	7.73	1.82	3.33
PIGH	1.32	1.16	7.96931e-07	5.96169e-06	55.39	65.53	5.91	8.89
SLC16A3	0.79	1.16	1.66093e-05	9.22102e-05	3.06	9.17	2.27	4.17
BBIP1	1.28	1.16	2.17197e-08	2.19549e-07	12.96	13.68	8.18	6.94
ARMCX3	1.54	1.16	5.98842e-14	1.62257e-12	29.48	37.87	4.09	6.39
C15orf61	0.84	1.16	1.38148e-06	9.78132e-06	9.66	17.42	4.55	5.28
CHRAC1	1.87	1.16	8.34882e-14	2.21353e-12	42.71	31.97	7.27	7.22
ARL14EP	0.7	1.16	0.00452388	0.0130874	20.89	27.92	7.73	9.44
CCR5	2.44	1.15	2.29706e-21	1.75986e-19	25.23	34.7	6.36	6.67
ADH5	1.56	1.15	1.17455e-08	1.2637e-07	40.25	44.18	8.64	8.89
MAP2K3	1.36	1.15	1.73706e-06	1.21289e-05	65.33	106.48	9.55	14.72
ODC1	2.36	1.15	2.15333e-18	1.13911e-16	62.15	78.65	8.18	10.83
IKZF5	0.74	1.15	6.87866e-05	0.00032865	6.16	13.96	3.18	5.56
CLPP	1.39	1.15	8.68057e-07	6.44602e-06	102.89	136.31	8.18	13.33
NFRKB	0.78	1.15	8.72793e-06	5.19328e-05	10.81	11.37	2.27	3.33
EGLN1	0.79	1.15	1.10473e-06	7.99511e-06	3.9	5.32	1.82	2.5
MSH6	-0.57	1.15	0.00128905	0.00441705	5.04	3.39	5	4.44
G6PC3	1.33	1.15	1.19453e-08	1.28213e-07	11.25	15.86	4.09	3.61
WDR48	2.03	1.15	1.54185e-19	9.73205e-18	15.28	26.73	4.09	5.56
SSH2	1.44	1.15	1.43451e-07	1.2351e-06	15.13	17.39	15	13.61
MAD2L2	1.42	1.15	5.83779e-07	4.48183e-06	87.18	170.24	12.73	20
PRKX	1.36	1.15	5.42005e-07	4.17265e-06	32.37	39.02	15.91	13.61
TRIM24	0.45	1.15	0.00749899	0.0200448	8.58	5.87	2.27	4.72
TRAV26-2	0.48	1.15	0.00527674	0.0148893	125.04	179.16	2.27	1.94
PPP2R1B	0.81	1.15	8.13296e-06	4.86532e-05	5.8	11.01	1.82	4.17
NAPEPLD	-0.48	1.15	0.000712406	0.00259991	5.9	7.68	1.36	2.5
C11orf57	0.86	1.14	8.42108e-07	6.27429e-06	6.68	15.59	1.82	3.61
DESI1	2.37	1.14	2.54981e-22	2.16227e-20	15.42	39.72	3.64	10.28
FOXO3	-0.38	1.14	0.021545	0.0492172	3.8	6.1	4.09	3.61
JAZF1	0.62	1.14	7.15604e-05	0.000340456	4.34	4.09	3.64	3.06
NUSAP1	1.44	1.14	2.72839e-13	6.64686e-12	15.28	39.35	3.18	4.44
GADD45GIP1	1.36	1.14	6.31737e-07	4.81673e-06	302.97	378.05	16.36	18.06
TRAPPC2	1.37	1.14	1.52329e-07	1.30573e-06	34.76	41.46	13.64	14.72
NFX1	1.58	1.14	1.60929e-08	1.67708e-07	23.4	39.51	5.45	10.28
PRDX4	1.37	1.14	8.35841e-08	7.61719e-07	41.56	66.2	4.55	5.56
CTNNBL1	2.65	1.14	6.92956e-31	2.0258e-28	28.03	54.48	5.91	10.56
GID8	0.6	1.14	0.000484612	0.00186153	12.42	43.08	3.18	7.22
RARS	1.46	1.14	6.48317e-08	6.04208e-07	38.57	49.32	9.55	6.94
NKAP	1.25	1.14	6.5095e-07	4.93948e-06	25.01	29.07	6.36	6.67
POLDIP2	1.25	1.14	5.73279e-09	6.61325e-08	46.26	82.51	5	6.94
C1orf43	1.46	1.14	4.13036e-07	3.24958e-06	113.86	147.29	12.27	14.17
AK3	1.35	1.13	6.87963e-07	5.19904e-06	42.9	81.28	8.18	11.67
ZNF438	0.4	1.13	0.011518	0.0289225	7.93	7.88	1.82	3.89
SPG21	1.21	1.13	6.52615e-06	3.99224e-05	35.88	57.77	7.73	11.67
ACOT13	0.88	1.13	9.28473e-06	5.48347e-05	7.77	13.25	4.09	5.28
SMYD3	1.3	1.13	6.3162e-12	1.216e-10	6.56	9.01	4.55	5.28
NRAS	0.56	1.13	0.00320703	0.00973413	21.54	19.31	5.91	6.94
SHC4	0.63	1.13	4.02686e-05	0.000203154	0	1.98	0	1.39
MSH5	0.58	1.13	8.13756e-05	0.000381274	0.18	0.65	1.36	1.67
NFS1	0.99	1.13	2.21053e-06	1.50082e-05	13.52	14.67	2.73	4.17
UBR2	1.45	1.13	1.3143e-07	1.14335e-06	27.54	33.81	14.09	15.56
DPY30	1.01	1.13	0.000124065	0.000552177	46.57	78.75	8.64	12.78
RNF34	1.23	1.13	1.14351e-05	6.60594e-05	55.88	81.69	14.55	15
N4BP3	-0.53	1.13	0.000617251	0.00228873	6.3	5.09	1.82	0.56
POLG	2.05	1.13	6.79334e-16	2.49067e-14	19.58	27.41	6.82	10.28
PIGQ	1.45	1.13	5.74124e-09	6.61613e-08	12.96	13.92	3.64	6.39
IFIT3	1.02	1.13	0.000151312	0.000661781	95.07	140.74	6.36	7.78
CXXC1	1.45	1.13	1.42463e-08	1.49586e-07	46.01	54.27	5.91	8.06
NUCB2	1.43	1.13	2.68151e-07	2.19521e-06	26.07	31.77	9.09	13.06
RPRD2	2.46	1.12	7.2673e-24	8.07325e-22	6.36	14.69	5.45	8.06
EIF1AY	1.17	1.12	3.99053e-06	2.55362e-05	24.92	48.93	6.82	7.22
GOLGA7	1.45	1.12	3.1942e-07	2.58632e-06	117.28	170.95	10.91	15
SLC22A18	1.14	1.12	3.76004e-10	5.32105e-09	2.92	11.73	0.91	5
C6orf1	1.39	1.12	7.51796e-07	5.64304e-06	111.72	165.63	11.82	17.5
HNRNPH3	1.34	1.12	1.52751e-06	1.07536e-05	34.54	59.52	8.18	15.28
NAT6	1.32	1.12	2.43464e-10	3.61583e-09	10.21	17.8	1.36	2.78
HIPK3	1.18	1.12	3.23441e-07	2.61507e-06	2.7	11.29	1.82	5.56
ZNF383	0.53	1.12	0.000310927	0.00125239	9.96	7.49	1.82	1.11
NANS	1.39	1.12	2.66805e-09	3.27507e-08	11.73	16	5.45	7.5
GPANK1	1.23	1.12	1.05199e-10	1.64599e-09	12.96	22.79	2.73	4.72
SERINC1	1.46	1.12	1.30139e-07	1.13478e-06	89.5	118.93	12.73	15.83
AIMP1	1.37	1.12	2.07808e-07	1.73967e-06	40.43	66.2	10.45	16.67
NUP98	1.31	1.12	3.42036e-07	2.7395e-06	8.81	20.25	6.82	10
BCAS2	1.42	1.12	2.18085e-07	1.81476e-06	119.89	158.83	8.64	11.67
DNAJB6	1.34	1.12	9.55926e-07	7.0095e-06	19.99	30.17	21.82	27.78
DCAF16	1.36	1.12	1.06635e-07	9.46933e-07	14.39	27.4	6.36	6.11
WDR55	1.57	1.12	9.16265e-13	2.01162e-11	11.95	12.45	8.18	10
HDDC3	1.18	1.12	3.54272e-07	2.83137e-06	20.34	36.56	3.18	6.67
CYB5R3	1.39	1.11	1.08752e-06	7.89112e-06	62.86	78.74	16.36	19.17
HELB	1.32	1.11	3.26954e-07	2.64155e-06	36.88	23.33	8.18	6.39
VPS37A	1.33	1.11	4.3397e-07	3.40224e-06	13.03	19.39	5.45	6.67
ARIH2	1.27	1.11	1.18183e-05	6.80256e-05	39.54	56.09	15	18.33
HLA-DPB1	1.38	1.11	1.32699e-07	1.15169e-06	314.37	351.19	42.27	46.11
ENO2	1.31	1.11	2.26816e-07	1.88177e-06	46.7	53.96	10.91	10.56
TAF13	0.51	1.11	0.000491912	0.00188501	4.73	10.72	0.45	2.22
FAM105A	0.76	1.11	0.000201249	0.000848774	21.02	31.06	2.73	6.11
MRPL13	2.51	1.11	1.57001e-21	1.21966e-19	45.94	49.59	9.55	10
AMBRA1	1.1	1.11	2.97207e-09	3.61629e-08	3.6	7.82	2.73	4.17
HRASLS2	0.34	1.11	0.0163265	0.0388281	10.7	13.22	0.91	1.39
STK38L	1.53	1.11	4.66047e-12	9.09898e-11	5.11	8.98	3.64	4.44
PLK3	1.05	1.11	7.00658e-06	4.25102e-05	41.62	69.91	9.09	8.33
VWA9	1.15	1.11	2.93844e-11	5.09253e-10	15.38	22.74	3.18	4.72
C17orf66	0.39	1.11	0.00780851	0.0207424	0.64	5.02	1.36	1.94
RPS6KA1	1.32	1.11	5.98865e-06	3.69599e-05	58.59	89.1	12.27	15.83
DUSP16	0.96	1.11	5.75725e-08	5.42011e-07	12.42	14.1	2.27	6.11
EEF2	1.47	1.1	4.47532e-08	4.2822e-07	47.33	55.94	13.18	15.83
PRSS23	0.57	1.1	0.00147956	0.00498679	5.89	6.81	2.73	3.61
PHF20	1.42	1.1	4.53548e-07	3.54073e-06	36.77	43.64	15	15.83
POLR2D	1.23	1.1	9.03111e-07	6.66179e-06	18.25	34.22	3.18	5.56
POLR2B	1.37	1.1	5.33288e-07	4.11124e-06	29.95	41.18	9.55	13.33
PDCL3	1.26	1.1	8.22214e-07	6.1343e-06	44.74	89.9	6.36	12.22
ERP27	0.42	1.1	0.00736756	0.019741	19.34	9.84	2.27	1.94
AP4E1	-0.44	1.1	0.00263309	0.00823589	2.24	5.05	5.45	4.44
SNAP29	1.15	1.1	1.16271e-06	8.37106e-06	16.53	26.77	5.91	8.06
HGS	1.36	1.1	1.7076e-06	1.19457e-05	46.39	64.54	15	19.44
PIM1	1.37	1.1	1.35088e-06	9.60133e-06	233.9	254.71	21.36	26.94
BCAP31	1.37	1.1	1.86719e-06	1.29157e-05	266.22	289.53	23.18	28.61
CLCN6	-0.49	1.1	0.00172161	0.00570905	5.23	10.59	2.27	2.5
SNAI3	1.62	1.1	8.87891e-11	1.4111e-09	50.2	79.66	1.82	4.72
MKLN1	1.29	1.1	1.63685e-06	1.14797e-05	17.23	16.01	11.82	15.56
RCHY1	0.46	1.1	0.007798	0.0207244	13.06	12.73	5	3.89
KIAA0947	0.97	1.1	4.06052e-05	0.00020448	9.45	11.68	7.73	6.11
RANGRF	1.16	1.1	5.17487e-13	1.19367e-11	0.71	3.16	2.73	6.39
COPS6	1.28	1.1	1.22383e-05	7.0313e-05	125.65	189.39	15.45	17.22
HN1L	-0.42	1.1	0.00218152	0.0070062	1.15	5	1.36	1.39
UBE2Z	0.97	1.1	1.46825e-06	1.03561e-05	12.93	20.02	6.36	7.22
TMEM39A	0.5	1.09	0.00167156	0.00555802	10.11	20.9	2.27	3.61
EMD	0.74	1.09	0.00324252	0.00982039	60.88	81.06	10	15.28
FAM192A	1.88	1.09	8.66742e-13	1.92188e-11	34.56	64.42	8.18	13.06
HNRNPUL1	1.22	1.09	3.25947e-06	2.12497e-05	28.82	47.6	20	25.83
GSTCD	0.48	1.09	0.00203922	0.0066065	0.28	3.9	0.45	1.67
VIMP	1.39	1.09	5.0673e-07	3.9201e-06	73.35	94.79	13.18	20.28
IGHV1-3	1.34	1.09	4.65621e-09	5.45056e-08	100.23	136.05	3.64	3.89
RFXANK	0.97	1.09	9.01183e-07	6.65199e-06	16.12	30.57	4.09	6.67
SLC35A4	1.45	1.09	2.83589e-07	2.31136e-06	58.34	63.27	7.73	8.61
HMGCS1	0.73	1.09	2.52436e-05	0.000134049	3.25	8.69	2.27	5
PAPOLG	1.28	1.09	1.24972e-07	1.0928e-06	14.05	12.77	6.82	6.11
ARPC5L	1.28	1.09	3.66322e-06	2.36048e-05	90.22	122.57	20.45	22.22
SMIM15	1.32	1.09	4.21882e-11	7.04765e-10	19.78	24.78	3.18	5.28
KRR1	0.79	1.09	0.000561201	0.00210408	14.58	20.97	5.91	7.5
DNAJB9	0.54	1.09	0.00390896	0.0115861	31.93	30.42	3.18	5
CD5	1.31	1.09	7.18451e-06	4.34237e-05	98.97	179.37	14.55	18.89
UQCRC2	1.28	1.08	6.11398e-06	3.76916e-05	70.78	74.61	9.55	15.56
HSPB11	1.29	1.08	8.57392e-07	6.37962e-06	57.11	94.9	15.91	22.5
KCTD13	1.24	1.08	3.32777e-07	2.67305e-06	18.81	22.15	6.36	7.5
TRBV27	1.93	1.08	6.27275e-20	4.17269e-18	182.58	510.82	2.27	5.56
IDI1	1.35	1.08	1.04494e-06	7.60198e-06	58.14	80.01	10.91	17.22
VPS4A	1.27	1.08	4.98073e-07	3.86008e-06	24.1	37.53	8.64	12.22
EDEM2	1.52	1.08	1.32275e-11	2.44094e-10	35.51	68.23	6.36	6.67
NUDT16L1	1.32	1.08	3.15562e-07	2.55695e-06	76.2	116.42	7.27	8.89
LRPAP1	1.32	1.08	2.21158e-06	1.50082e-05	20.98	39.51	11.36	14.72
NTAN1	0.55	1.08	0.00609372	0.0167895	16.95	32.78	5	5.56
AAMP	1.51	1.08	8.40716e-08	7.65534e-07	71.45	137.21	6.36	13.89
MAP2K4	1.31	1.08	3.07501e-07	2.49892e-06	29.08	30.64	6.82	7.5
MRPL17	0.85	1.08	0.000617684	0.00228958	28.76	55.4	2.73	6.39
TMEM170A	1.2	1.08	1.75704e-06	1.22452e-05	14.88	20.35	8.18	8.61
ERCC5	1.21	1.08	1.16266e-07	1.0259e-06	7.65	9.83	10	14.17
ATP6V1H	1.63	1.08	1.00718e-10	1.58481e-09	20.17	33.14	6.82	9.17
GZMH	1.37	1.08	6.20863e-07	4.74684e-06	2202.15	2856.35	38.64	51.39
TIMMDC1	1.28	1.08	3.16527e-06	2.07329e-05	65.93	82.73	8.64	10.28
DNAJC8	1.33	1.08	1.57868e-06	1.10927e-05	116.8	172.53	17.73	25
NTHL1	0.83	1.08	5.75152e-07	4.41864e-06	17.73	25.59	1.36	3.61
PRMT2	1.38	1.08	2.55756e-06	1.71363e-05	65.06	106.59	20.45	25.56
TBC1D13	0.71	1.08	1.72562e-05	9.51359e-05	7.04	13.12	1.36	3.61
FAM195A	0.54	1.08	0.00268223	0.00836053	12.12	24.52	2.73	3.61
UBL7	1.14	1.08	3.45455e-07	2.76289e-06	82.68	101.37	5.45	5.83
SRGAP2	0.68	1.07	0.00050787	0.00193803	6.3	5.77	9.09	11.39
TMEM33	1.32	1.07	5.22992e-07	4.04027e-06	18.53	16.31	5.91	6.67
RAP2C	0.91	1.07	0.000192869	0.000818716	32.24	30.41	10	10.56
LSM1	1.14	1.07	6.68694e-07	5.07067e-06	15.74	39.4	4.09	9.44
PSMA4	1.26	1.07	1.31995e-05	7.51196e-05	91.37	160.69	14.09	22.78
ACIN1	1.23	1.07	9.95191e-07	7.27367e-06	13.45	17.62	16.36	13.06
TP53INP1	1.19	1.07	1.08034e-06	7.84922e-06	15.41	21.61	6.82	8.61
SNX2	1.42	1.07	3.07729e-11	5.30833e-10	20.45	34.45	5.45	5.28
KDM1B	0.72	1.07	3.33906e-06	2.1743e-05	5.7	4.56	1.36	2.22
TXK	0.63	1.07	0.0110367	0.0278589	20.83	38.31	5	8.61
WBSCR22	1.25	1.07	7.94113e-06	4.75825e-05	22.82	46.29	9.09	12.5
CERKL	1.22	1.07	7.55492e-12	1.43221e-10	5.06	5.37	3.64	6.39
CNOT4	1.49	1.07	2.58882e-09	3.18838e-08	22.39	22.51	10.45	11.67
ITGAM	0.63	1.07	0.000538402	0.00203301	1.05	13.06	0.45	4.17
BRD8	3.05	1.07	1.39743e-28	2.82256e-26	42.3	72.98	6.82	9.44
FBXO46	0.56	1.07	0.000120805	0.000538534	3.31	2.68	1.82	3.06
C12orf44	0.96	1.07	3.56012e-08	3.46317e-07	3.67	12.01	0.91	3.33
C14orf159	1.96	1.07	5.51598e-13	1.25999e-11	37.52	40.16	10.45	17.22
LAMTOR5	1.31	1.07	1.37129e-06	9.71532e-06	76.43	155.84	13.64	20.56
SENP5	1.65	1.07	1.94029e-09	2.45498e-08	32.24	59.42	17.73	20.28
LYSMD3	0.49	1.07	0.00478131	0.0137072	7.14	12.11	4.09	5.28
TXNL4B	0.72	1.07	9.12799e-05	0.000420759	20.77	18.56	2.27	3.89
TGFBR2	2.09	1.06	1.32806e-14	4.04142e-13	35.09	64.83	14.09	16.39
RHOG	1.32	1.06	5.17659e-06	3.23435e-05	177.02	231.77	12.73	18.06
TMEM243	1.17	1.06	7.54174e-06	4.54345e-05	38.39	61.87	10.91	13.89
PTPRE	1.12	1.06	2.93812e-05	0.000153598	22.24	28.04	17.27	18.06
EMC10	1.21	1.06	2.38091e-09	2.9652e-08	6.78	8	10.91	7.5
MOCS2	1.49	1.06	1.10236e-12	2.37328e-11	19.85	20.62	2.73	5.28
MRPS10	0.9	1.06	4.766e-05	0.000236048	52.95	79.53	6.36	6.94
DCTN2	1.35	1.06	4.29634e-06	2.72576e-05	50.36	96.78	8.18	11.67
UBB	1.17	1.06	5.24721e-08	4.96519e-07	254.57	399.76	50.91	65
LSM12	1.29	1.06	2.34205e-08	2.35668e-07	29.89	36.41	14.55	16.11
PDE4D	1.65	1.06	7.75488e-10	1.04297e-08	9.2	14.97	9.09	11.94
SUB1	1.25	1.06	5.9205e-07	4.53905e-06	70.37	104	40.91	50.28
UBE2S	1.14	1.06	4.05428e-06	2.58993e-05	62.61	113.57	5.91	10.83
UBA7	1.35	1.06	3.43535e-06	2.22917e-05	88.81	131.02	13.18	17.78
ESF1	-0.65	1.06	0.000235065	0.000975107	29.53	21.72	6.82	4.44
PCNA	1.08	1.05	2.19124e-05	0.000118098	84.52	94.5	5.91	7.22
CDC16	2.56	1.05	4.29834e-24	4.87247e-22	19.05	39.24	5	8.89
LETM1	1.97	1.05	1.41649e-17	6.55657e-16	10.11	19.78	7.73	10.28
DTX3L	1.45	1.05	3.67e-09	4.38387e-08	21.18	27.75	10.91	11.67
CTDSP1	1.19	1.05	1.27506e-05	7.29054e-05	29.5	47.68	10	12.78
SLAMF8	0.39	1.05	0.00935076	0.0242083	5.96	9.07	2.27	1.67
COPS5	0.54	1.05	0.0197973	0.0457992	18.19	22.68	8.64	9.17
WEE1	1.3	1.05	1.49753e-12	3.13296e-11	4.22	9.23	2.27	5.56
DSTN	1.42	1.05	3.11848e-07	2.5324e-06	57.97	104.25	12.27	19.17
MRPS27	1.03	1.05	1.36492e-07	1.17999e-06	15.17	10.12	3.18	4.72
NIPSNAP1	0.86	1.05	0.00180343	0.00595727	59.49	67.43	7.27	8.33
NR4A1	1.2	1.05	2.42134e-06	1.63022e-05	11.62	27.45	5.91	11.11
MTMR3	1.1	1.05	1.09473e-06	7.92787e-06	2.64	6.6	7.73	6.94
TCEAL8	1.22	1.05	2.97587e-10	4.32143e-09	56.22	76.99	4.55	6.39
LSM3	1.24	1.05	1.0926e-06	7.9209e-06	35.42	41.55	14.55	16.39
BAG1	1.16	1.05	1.42492e-05	8.04565e-05	17.97	26.41	8.18	10.28
MAD2L1	0.41	1.05	0.0094395	0.0243868	4.58	14.22	2.73	4.44
MRPL11	1.21	1.05	2.85241e-06	1.88728e-05	38.9	50.57	5.91	8.06
CENPV	1.17	1.04	7.0918e-09	7.99826e-08	22.5	8.01	2.73	2.78
TTC38	1.26	1.04	1.00216e-05	5.86981e-05	62.37	130.96	7.73	17.78
GIGYF2	1.84	1.04	6.67429e-13	1.51008e-11	12.69	11.46	11.82	9.72
KRCC1	1.21	1.04	6.66069e-06	4.05889e-05	64.3	90.54	5	8.33
SLA	1.22	1.04	1.68053e-05	9.30661e-05	119.17	223.78	29.09	44.17
SLAMF7	1.37	1.04	6.25213e-06	3.84153e-05	93.53	169.01	13.64	16.39
MT1F	1.31	1.04	2.33829e-07	1.93562e-06	67.93	73.91	11.82	11.94
DPH3	1.98	1.04	1.73091e-20	1.19433e-18	14.03	29.3	4.09	5.83
MYNN	1.1	1.04	6.72964e-07	5.09609e-06	15.42	18.78	7.27	6.67
MFF	1.08	1.04	9.10512e-05	0.000420053	23.28	43.84	5.91	11.39
BNIP2	1.43	1.04	2.43023e-07	2.00277e-06	37.53	34.93	15.91	14.72
TPST2	1.28	1.04	1.00436e-05	5.8785e-05	174.62	195.05	20.91	23.89
C7orf26	1.45	1.04	4.5829e-10	6.38788e-09	23.95	34.76	4.55	6.11
TRA2B	1.27	1.04	4.51746e-06	2.85224e-05	27.61	37.03	19.55	24.44
TUBB2A	1.16	1.04	4.54117e-09	5.32713e-08	6.2	14.63	0.45	2.22
VWA5A	0.38	1.04	0.0145838	0.0353121	5.9	10.52	1.36	1.94
ATG12	1.22	1.04	1.35633e-05	7.69143e-05	29.29	26.77	12.27	10.28
PTTG1IP	1.28	1.04	2.51127e-06	1.68464e-05	61.74	52.22	7.27	7.22
HTRA2	1.36	1.04	5.38687e-11	8.82636e-10	22.68	29.41	5.45	7.22
ATF2	1.18	1.04	2.97569e-06	1.96067e-05	16.6	17.39	5.91	8.06
SLC11A2	0.37	1.04	0.0123757	0.0307428	3.96	3.57	2.27	2.5
C10orf88	0.77	1.04	5.12469e-05	0.000252686	21.16	33.77	2.27	4.44
ASH2L	0.9	1.04	9.73297e-05	0.00044587	29.09	28.25	10.45	6.94
SMG9	1.33	1.04	3.16164e-08	3.11095e-07	25.07	14.73	5.45	6.94
STX6	1.13	1.04	2.13235e-08	2.15937e-07	13.08	11.26	5.45	5.56
PMVK	0.86	1.04	0.00068145	0.00250173	63.32	143.79	7.27	9.17
NIP7	1.75	1.03	6.06259e-16	2.24498e-14	24.36	49.1	4.09	6.39
CHD3	1.15	1.03	5.18657e-05	0.000255397	27.9	49.53	15	17.78
IL18RAP	1.83	1.03	6.2212e-12	1.19985e-10	44.77	95.98	5.91	12.5
ANAPC13	-0.79	1.03	2.78271e-05	0.000146092	56.98	53.76	6.36	5
KSR1	-0.43	1.03	0.0017854	0.00590296	0.42	1.23	0.45	0.83
MAP3K2	0.87	1.03	7.88483e-05	0.000370684	10.63	20.53	7.73	11.39
FOXP1	1.19	1.03	1.39602e-05	7.90034e-05	20.3	22.55	23.64	20.28
USP49	0.45	1.03	0.00365479	0.0109335	0	1.41	0	1.94
CALCOCO2	1.23	1.03	1.82337e-05	9.98872e-05	50.65	87.06	16.82	23.89
BTF3L4	0.89	1.03	0.0001182	0.00052916	17.53	17	9.09	8.06
PHB2	1.22	1.03	1.46569e-05	8.2359e-05	103.81	107.87	12.73	11.94
GSE1	0.48	1.03	0.00520549	0.0146958	6.95	16.35	4.09	3.61
PPP2R1A	1.26	1.03	8.94581e-06	5.30304e-05	63.37	102.54	16.82	21.11
PPIH	2.17	1.03	7.7919e-18	3.8301e-16	29.86	55.19	5	6.67
LPXN	1.22	1.03	3.58481e-05	0.000183182	216.98	273.07	19.09	22.5
NDUFA3	1.19	1.03	1.99737e-06	1.37307e-05	109.35	147.96	34.09	35.28
SMIM11	1.3	1.03	5.90484e-08	5.5356e-07	12.36	21.32	4.55	7.78
NAT9	1.23	1.03	2.6495e-06	1.76777e-05	30.36	31.27	4.55	5.28
SPATS2L	0.7	1.03	0.000561072	0.00210408	4.67	8.18	5.91	8.06
NBN	1.15	1.02	1.43045e-05	8.07054e-05	21.08	39.64	10.45	13.33
FAM96A	1.8	1.02	4.68008e-13	1.09455e-11	45.95	88.97	6.82	11.67
DRG1	1.28	1.02	1.03037e-05	6.01178e-05	114.74	131.16	7.73	9.72
RAB7A	1.22	1.02	1.9719e-05	0.000107224	197.79	315.13	23.18	28.61
CNST	1.06	1.02	6.29878e-06	3.86592e-05	11.61	16.98	6.36	8.06
GMEB2	-0.54	1.02	0.000226174	0.000943157	3.62	14.44	2.73	3.33
VDAC3	1.25	1.02	1.77494e-05	9.74201e-05	114.73	171.06	12.27	15.83
DLD	1.1	1.02	2.7449e-05	0.00014438	17.08	24.42	6.36	7.5
ARL3	1.18	1.02	2.37203e-06	1.59993e-05	21.32	29.5	7.73	8.33
BAX	1.76	1.02	1.69148e-14	5.01085e-13	36.48	48.59	6.82	11.39
RPUSD4	1.05	1.02	1.68753e-09	2.15584e-08	18.2	20.74	3.18	2.22
ZFAND2B	1.26	1.02	1.94946e-05	0.000106159	112.84	133.31	11.82	15
HSCB	0.51	1.02	0.00565055	0.0157521	29.49	40.52	3.64	3.89
FBXO11	0.67	1.02	0.000275059	0.00112092	7.89	7.26	5.45	5.56
CNOT2	1.29	1.02	6.39224e-06	3.91679e-05	27.61	33.17	14.09	19.44
PIP5K1A	0.6	1.02	0.00128015	0.00439333	9.92	7.32	4.55	3.89
GLA	0.88	1.02	2.52791e-05	0.000134174	33.57	32.44	1.36	2.78
GAB3	1.23	1.02	1.28124e-05	7.32167e-05	37.16	66.23	10	12.22
SNX3	1.1	1.02	0.000127238	0.00056517	224.64	350.91	15.91	25.28
SYT11	1.32	1.01	6.47684e-07	4.92142e-06	36.07	34.94	9.09	9.17
GYPC	1.17	1.01	3.57566e-05	0.000182835	92	173.2	17.27	23.61
RNF31	0.47	1.01	0.00196811	0.00640822	2.16	6.27	1.36	2.78
POLM	2.29	1.01	1.8588e-18	9.88013e-17	36.04	56.64	5.91	9.17
PUS7	0.67	1.01	3.70408e-05	0.000188496	4.74	8.68	0.91	2.5
RPS6KB2	1.24	1.01	3.59097e-06	2.31814e-05	24.34	31.97	11.36	11.39
USF2	1.16	1.01	4.40585e-10	6.16411e-09	12.07	23.86	5	6.94
APEH	1.23	1.01	9.29062e-06	5.48403e-05	50.89	70.87	9.55	13.61
LYRM1	1.49	1.01	3.58535e-09	4.28736e-08	30.65	51.37	5	6.11
HCFC1R1	1.25	1.01	1.14388e-07	1.01254e-06	58.17	50	9.55	9.72
MBNL3	-0.66	1.01	0.000385168	0.00151356	16.65	6.81	5	4.72
KLHL7	1.37	1.01	1.75153e-10	2.66204e-09	11.21	18.02	3.64	6.11
ABR	1.1	1.01	4.93563e-07	3.82891e-06	16.93	18.86	5	8.61
METTL23	1.2	1.01	4.59759e-06	2.8954e-05	78.37	83.5	9.55	13.89
FAM114A2	0.61	1.01	0.000366607	0.00144625	6.4	9.95	2.27	3.33
IER3	1.05	1.01	1.13357e-07	1.00422e-06	9	19.09	1.82	3.89
HIST1H1E	1.19	1.01	1.83775e-06	1.27517e-05	119.14	200.03	11.36	12.22
GLCCI1	1.82	1.01	1.17378e-13	3.07537e-12	19.99	23.29	10.91	12.5
CIAO1	1.33	1.01	3.82911e-06	2.45882e-05	89.72	119.13	12.27	18.61
NSUN6	-0.41	1.01	0.0050855	0.0144172	8.21	14.93	8.18	5.56
RIC8B	-0.53	1.01	0.000206553	0.000868837	2.88	7.06	2.73	1.67
MAGEF1	0.38	1.01	0.010104	0.0258748	9.27	13.8	0.91	1.39
GCNT1	1.51	1.01	1.95199e-09	2.46697e-08	27.75	36.94	8.64	9.44
EPT1	0.75	1	3.68744e-06	2.37334e-05	3.44	4.2	1.36	2.78
NGLY1	2.06	1	1.50438e-16	5.99003e-15	16.18	26.22	10	10.28
LMAN1	0.59	1	0.0180407	0.0423441	17.21	20.33	7.73	7.78
UBE2F	1	1	4.39354e-05	0.000219657	20.52	45.11	8.64	16.67
CBX6	1.18	1	1.03268e-05	6.02207e-05	35.1	42.25	23.64	21.67
MSL3	1.08	1	2.47158e-05	0.000131622	16.75	23.13	8.64	9.44
KDM2B	0.44	1	0.0182506	0.0427194	3.72	3.93	5.45	6.11
S1PR4	1.16	1	2.78194e-05	0.000146092	100.39	148.27	9.55	13.06
EPS15L1	1.59	1	4.00085e-10	5.64745e-09	19.51	15.86	7.73	7.22
ADRB2	1.26	1	7.65983e-06	4.59962e-05	110.29	117.83	5.91	8.61
MAD2L1BP	1.41	1	1.38893e-11	2.55034e-10	37.34	66.12	4.55	5.83
NOP2	1.44	1	3.99322e-07	3.15061e-06	52.88	102.97	5.91	9.17
FTO	0.63	1	0.000101245	0.000462282	4.8	3.26	2.73	3.33
SIGIRR	1.21	1	2.08915e-05	0.000112991	95.77	132.02	19.09	21.39
ATPAF1	1.16	1	2.3061e-10	3.43873e-09	10.93	13.54	3.18	4.72
BAZ1A	1.18	1	2.34368e-05	0.000125414	34.74	61.48	13.18	18.89
TTC31	0.92	1	9.0382e-05	0.000417834	50.65	51.3	7.27	7.22
ENOPH1	1.23	1	1.68661e-05	9.33559e-05	85.63	126.82	7.73	9.17
DERL1	1.54	1	5.57697e-09	6.44689e-08	20.74	24.79	9.09	12.22
ABCD1	0.53	1	0.000629869	0.00233163	1.1	4.21	0.45	2.22
VPS41	0.76	1	0.00507848	0.0144031	28.76	39.49	11.82	10
PPP2R5D	3	1	1.30077e-33	5.16082e-31	35.31	90.17	6.36	10.56
ZCCHC17	2.31	0.99	1.61363e-20	1.12741e-18	46.72	80.33	7.27	9.72
KRAS	1.12	0.99	3.21647e-05	0.000166426	30.96	31.67	12.27	13.06
CCL4	1.14	0.99	1.09229e-05	6.34129e-05	3793.45	6662.65	60.45	76.39
PIGX	-0.46	0.99	0.0088733	0.0231795	11.51	13.37	6.36	5.28
GTF2H5	1.2	0.99	5.04362e-06	3.16016e-05	12.29	17.65	7.27	8.06
FOXP3	0.34	0.99	0.0219173	0.0499137	4.44	11.46	0.91	1.39
GATAD2A	1.09	0.99	7.3262e-06	4.4256e-05	8.82	15.37	10	8.33
LOH12CR1	1.3	0.99	1.21357e-09	1.58793e-08	36.52	53.27	7.27	10.56
SOS2	0.76	0.99	4.85554e-05	0.000240054	6.99	9.93	4.55	5.28
RTCB	0.97	0.99	0.000345402	0.00137185	52.99	96.52	6.82	9.17
POLD2	1.96	0.99	1.44576e-13	3.70067e-12	25.45	47.96	5.91	7.22
UCK2	1.36	0.99	2.04958e-09	2.57857e-08	5.62	9.46	3.18	4.17
PELP1	0.83	0.99	2.21731e-06	1.50379e-05	3.66	4.01	4.09	6.94
ARNTL	0.72	0.99	0.0022558	0.00722144	14.79	21.89	8.18	9.72
C6orf203	0.9	0.99	2.08941e-07	1.74783e-06	33.61	39.06	1.82	3.89
STIM1	1.22	0.99	2.06868e-06	1.41595e-05	18.27	21.18	12.27	12.22
RNGTT	0.77	0.99	0.00025422	0.0010452	15.08	29.23	7.27	6.94
GOLGA4	1.21	0.99	1.8331e-05	0.000100364	28.42	43.88	20.45	18.89
ACSL5	1.14	0.99	3.2978e-05	0.000170228	48.1	65.78	13.64	14.17
CD101	0.82	0.99	0.000293566	0.0011872	9.45	36.19	3.64	7.5
HLTF	0.99	0.99	3.24324e-06	2.11687e-05	19.3	26.7	7.27	6.11
ELP4	0.47	0.98	0.00857361	0.022525	25.52	20.1	3.18	3.33
GNG2	1.14	0.98	1.67132e-05	9.26945e-05	48.22	65.77	25.45	35.83
NEK1	0.68	0.98	0.00221962	0.0071183	18.9	19.82	8.18	6.94
RNF8	0.9	0.98	1.82349e-05	9.98872e-05	8.35	16.76	4.55	5.28
TMEM259	1.24	0.98	2.88078e-06	1.90378e-05	33.77	39.54	12.27	11.94
CCDC34	0.44	0.98	0.00457926	0.0132304	2.18	12.17	0.45	1.67
PAFAH2	0.98	0.98	2.62607e-08	2.60473e-07	31.73	19.08	3.64	3.89
PMF1	1.13	0.98	3.97388e-07	3.13758e-06	19.11	25.43	9.55	11.11
SNX32	0.34	0.98	0.0174202	0.0410959	0.22	10.28	0.91	1.39
PDHA1	0.75	0.98	0.00134765	0.00459518	31.25	40.27	5.91	7.78
IRF3	1.21	0.98	1.43139e-05	8.07175e-05	58.09	93.14	12.27	14.17
FAM21C	1.39	0.98	6.66031e-12	1.26911e-10	13.88	24.24	6.82	10.56
BRMS1	1.13	0.98	2.98793e-05	0.000155835	54.73	90.65	6.36	10.83
BUB1	0.47	0.98	0.00310556	0.00948133	2.78	6.84	1.82	3.06
STXBP2	1.12	0.98	6.98299e-06	4.23902e-05	19.94	27.22	13.64	17.5
MUT	0.9	0.98	1.35865e-07	1.17549e-06	13.1	11.94	1.82	2.5
TMEM208	0.75	0.98	0.0057594	0.0160073	136.29	139.57	9.09	8.06
IGF2R	0.92	0.98	3.18547e-06	2.08406e-05	7.3	7.42	4.09	6.67
MMP23B	0.5	0.98	0.000495186	0.00189625	0	0.61	0	1.11
IKBKE	0.93	0.97	0.000393216	0.00154246	36.76	53.99	7.73	8.89
SF3A2	0.79	0.97	0.000440725	0.00170839	18.03	26.97	13.18	18.06
TMEM242	0.72	0.97	0.00591189	0.0163575	32.57	46.34	9.55	10
PHF17	1.4	0.97	1.36526e-13	3.51082e-12	11.26	6.38	5.45	5.56
CCDC124	1.16	0.97	1.17689e-05	6.77761e-05	76.73	113.78	11.36	16.11
WRAP53	0.78	0.97	4.71278e-06	2.96605e-05	2.43	14.93	0.91	2.22
SIN3A	0.77	0.97	0.00110651	0.00385821	11.14	15.59	9.09	9.72
CCNK	0.6	0.97	0.00609596	0.0167915	8.64	9.47	10.91	8.89
PRPS1	0.9	0.97	2.44924e-05	0.000130497	38.56	67.37	4.09	8.06
NKG7	1.05	0.97	3.81422e-08	3.70063e-07	5472.21	7965.45	81.36	87.78
ITGB1BP1	1.16	0.97	3.83144e-05	0.000193911	39.11	54.62	16.36	14.72
MRPS21	1.19	0.97	1.51403e-05	8.48179e-05	233.83	350.77	20.45	25.56
NDUFB9	1.14	0.97	3.0946e-05	0.000160645	93.42	124.22	15.45	20.28
PDE3B	1.39	0.97	1.06034e-08	1.15145e-07	10.98	28.04	8.64	15.28
DYNLT1	1.23	0.97	1.0244e-05	5.98005e-05	157.83	220.06	22.27	30
RPUSD1	0.76	0.97	0.000705481	0.00258057	17.97	37.91	4.55	4.44
CSE1L	1.4	0.97	6.49069e-09	7.40298e-08	23.93	20.2	6.36	7.78
VAMP5	1.18	0.97	1.50564e-05	8.44327e-05	212.12	321.06	12.73	18.06
GBP1	1.18	0.97	4.86399e-05	0.000240365	97.92	151.37	16.36	21.67
TRBV6-5	1.15	0.97	5.62083e-07	4.32123e-06	151.1	179.46	5	4.17
FAM8A1	-0.54	0.97	0.000550214	0.00206987	3.58	12.88	3.64	2.78
KLRD1	1.12	0.97	5.94212e-05	0.000289268	145.04	250.88	25.45	40.56
RAP2B	1.23	0.97	5.96973e-06	3.68745e-05	38.32	37.48	13.18	14.72
TIMM21	0.48	0.96	0.0138697	0.0338338	14.39	22.69	3.18	4.44
NRD1	1.12	0.96	6.72173e-05	0.000321861	74.48	88.98	25.91	25.56
TRIM37	0.87	0.96	1.9922e-05	0.000108169	24.04	24.63	6.82	6.11
CASC4	2.43	0.96	5.02209e-23	4.85134e-21	13.32	20.73	9.09	11.67
PLRG1	1.45	0.96	1.07931e-12	2.33269e-11	15.05	31.04	3.64	6.94
PPID	1.37	0.96	4.39142e-09	5.1788e-08	40.64	45.2	6.82	7.78
GNAS	1.18	0.96	1.31281e-05	7.48284e-05	58.59	80.83	38.18	42.22
UBE2V1	0.7	0.96	3.69963e-05	0.000188442	6.73	16.46	5.45	8.61
SMARCA2	1.6	0.96	6.62915e-10	9.0582e-09	21.25	29.29	12.27	14.44
ZBP1	1.2	0.96	1.71408e-05	9.45937e-05	54.91	75.97	13.64	16.11
REXO4	1.39	0.96	2.14562e-11	3.81982e-10	34.27	36.07	6.82	6.39
NFKB1	1.25	0.96	2.02688e-10	3.03868e-09	7.82	15.07	4.09	8.33
PTPLAD1	1.19	0.96	1.25284e-05	7.18153e-05	45.99	43.23	7.73	7.22
ITPR1	1.14	0.96	1.44278e-05	8.13182e-05	9.87	12.3	8.64	9.44
FGGY	0.95	0.95	3.77138e-07	2.99258e-06	3.37	9.09	2.27	3.06
NOP10	1.08	0.95	5.62259e-05	0.00027516	555.51	935.31	21.82	31.39
FBXW4	1.52	0.95	2.97105e-11	5.13303e-10	18.99	24.77	6.36	5.83
ATP6V1G1	1.15	0.95	2.72963e-05	0.000143645	450.85	579.28	26.82	33.61
HUWE1	1.15	0.95	1.48244e-05	8.31738e-05	10.11	14.33	11.36	11.94
ING5	0.9	0.95	9.02587e-05	0.000417437	17.84	25.76	9.09	7.22
TRAFD1	1.15	0.95	6.84281e-05	0.000327235	75.43	120.84	12.27	14.17
ARHGAP18	1.06	0.95	5.26453e-06	3.2856e-05	35.55	43	11.36	9.72
TPP1	1.13	0.95	0.000133202	0.000588833	62.43	86.98	7.73	11.67
PRPF4	0.65	0.95	9.73808e-05	0.00044592	22.04	21.67	4.55	3.89
HOMEZ	0.79	0.95	8.76349e-07	6.50325e-06	1.76	3.67	0.45	2.5
CUL3	0.41	0.95	0.0218406	0.0497697	2.97	5.52	5.45	4.72
CCDC90B	1.13	0.95	4.58026e-05	0.000228259	23.73	36.87	5.91	10.28
GALK1	1.04	0.95	4.65345e-05	0.000231402	23.05	48.78	2.27	5.83
ATP7A	0.44	0.95	0.0162272	0.0386344	5.53	6.02	3.18	2.78
SLC27A2	0.9	0.95	0.000262057	0.00107464	47.74	49.67	6.82	5.28
DAPK3	1.04	0.95	6.29494e-08	5.8864e-07	11.38	16.23	3.18	3.06
TRIM11	1.3	0.95	9.50961e-07	6.9823e-06	16.51	20.04	7.27	8.61
SNRPB	1.1	0.95	4.81156e-05	0.000238092	205.2	296.44	25.45	31.94
FDFT1	1.3	0.95	1.08702e-05	6.31575e-05	94.34	101.06	14.09	18.89
ASNA1	1.23	0.94	4.06621e-06	2.59607e-05	51.53	74.55	4.55	7.22
C17orf59	1.39	0.94	2.11254e-11	3.77302e-10	46.11	73.01	3.18	5.56
PES1	0.48	0.94	0.0181645	0.0425626	26.12	24.74	5.45	6.11
SET	1.06	0.94	2.72048e-05	0.000143231	190.78	223.34	51.82	52.78
HIST1H4C	1.1	0.94	7.84779e-05	0.000369255	1889.2	2355.43	36.36	34.17
ORC5	1.29	0.94	3.30846e-07	2.66139e-06	33.01	29.22	5	6.67
GALNT10	1.18	0.94	1.23001e-09	1.60755e-08	5.65	5.92	3.18	8.06
PDCD2L	0.32	0.94	0.0210103	0.0481641	1.86	13.86	0.45	2.22
TNFSF10	1.02	0.94	0.000363448	0.00143481	125.2	164.27	15.91	18.89
CCDC6	0.66	0.94	4.2471e-05	0.000213007	4.26	4.7	1.36	3.33
MEF2D	1.1	0.94	2.20533e-06	1.49841e-05	11.03	13.2	9.09	12.22
VRK1	0.87	0.94	0.000183825	0.000785126	31.49	31.15	5.45	6.39
RAD9B	0.55	0.94	0.000949405	0.00336963	3.55	2.95	3.18	2.5
CEBPD	0.74	0.94	1.23671e-06	8.84893e-06	3.05	4.42	0.91	2.5
IL4I1	0.35	0.94	0.0164235	0.0390097	0.04	7.81	0.91	1.11
SERPINB8	0.71	0.94	7.62142e-06	4.584e-05	1.37	3.34	1.36	2.5
HMOX2	1.17	0.94	6.05994e-05	0.000294616	129.08	188.9	19.55	23.06
MXD4	0.66	0.94	0.00591745	0.0163606	11.85	24.91	8.18	11.67
CCDC91	1.11	0.94	4.34253e-05	0.000217597	33.4	53.84	13.18	14.72
PMAIP1	1.07	0.94	6.44823e-05	0.000309941	62.74	157.96	8.64	15.56
RPS20	1.05	0.94	2.33609e-05	0.000125068	181.19	239.75	43.64	47.22
ZNF107	1.16	0.94	2.86067e-09	3.49606e-08	7.25	8.52	5.45	8.06
ZCCHC6	0.96	0.94	0.000589779	0.0021962	46.75	47.75	14.55	13.89
TXNDC11	1.17	0.94	3.98239e-06	2.54988e-05	26.05	22.74	5	8.06
TRAPPC3	1.29	0.93	8.47479e-08	7.70177e-07	46.61	66.59	8.64	8.61
SLC4A7	0.61	0.93	0.00537147	0.0150991	10.01	12.33	11.82	10.28
MAP2K2	0.89	0.93	0.000413176	0.00161165	20.1	36.89	12.27	11.11
POLR3GL	1.04	0.93	0.000222961	0.000931506	169.76	281.46	15.45	20.56
HLA-DQB1	1.22	0.93	1.84125e-06	1.2768e-05	32.28	39.94	14.55	15.56
FBXO32	1.8	0.93	1.4927e-13	3.79461e-12	16.59	14.65	7.73	5.83
CSNK2A2	0.61	0.93	0.00353506	0.0106167	15.22	15	6.82	5.28
RNPEPL1	1.06	0.93	1.3407e-06	9.53509e-06	14.09	15.38	5.45	7.78
CCND3	1.07	0.93	0.000245399	0.00101268	163.99	260.33	22.73	38.06
EIF3H	1.11	0.93	0.00010376	0.000471825	36.6	58.57	14.55	18.33
SMAD7	0.41	0.93	0.0179289	0.0421171	8.81	23.35	2.73	2.78
GTF3C6	1.17	0.93	1.09364e-05	6.34403e-05	166.22	199.75	12.27	14.17
MANF	1.15	0.93	6.98175e-06	4.23902e-05	38.11	36.88	5.45	5.83
ITFG2	1.09	0.93	8.76892e-05	0.000407079	35.25	37.26	10	12.22
MRPL14	1.15	0.93	4.10642e-05	0.000206604	207.08	221.57	10	10.28
TLE4	1.01	0.93	1.7203e-05	9.48897e-05	7.65	9.01	7.73	8.89
SNRNP27	1.09	0.93	3.12251e-06	2.05133e-05	29.72	44.18	10	14.17
UHRF1BP1	0.41	0.93	0.0130385	0.0321268	0.34	3.53	1.36	1.67
ITGB2	1.08	0.93	6.81248e-05	0.000325996	220.75	338.9	43.18	49.44
SVIP	0.89	0.93	0.000283057	0.0011493	23.97	39.99	16.36	16.67
PSMD7	1.06	0.93	5.65962e-05	0.00027685	63.19	95.27	11.82	20
XRN1	1.06	0.93	0.000169026	0.000728075	39.7	47.29	24.09	26.11
PIP4K2A	1.07	0.93	0.000120963	0.000539021	179.62	252.32	33.64	44.17
ARF4	1.14	0.92	6.86266e-05	0.000328043	95.21	166.18	10.91	16.39
TMEM120A	1.13	0.92	5.69037e-05	0.000277987	92.67	170.17	6.36	12.22
ZNF429	1.07	0.92	3.72697e-07	2.96158e-06	13.9	17.89	2.73	4.72
TMEM203	1.06	0.92	5.67489e-05	0.000277475	53.64	85.13	5.45	6.39
NUDT9	0.82	0.92	1.08577e-06	7.88356e-06	17.95	20.73	2.27	3.61
SLC2A8	1.08	0.92	4.56254e-09	5.34655e-08	10.13	19.53	2.73	4.17
STT3A	1.11	0.92	2.54355e-05	0.000134775	16.97	28.03	9.55	11.11
BTF3	1.09	0.92	4.23406e-05	0.000212641	260.91	325.27	37.27	40
ZNF148	1.11	0.92	1.5839e-05	8.8331e-05	10.68	13.24	7.73	9.44
JOSD2	1.09	0.92	2.16701e-05	0.000116918	67.69	78.02	8.18	8.33
ECD	1.18	0.92	2.25224e-06	1.52469e-05	41.66	77.57	7.73	10.83
EVI2B	1.1	0.92	5.85877e-05	0.000285712	119.61	145.68	16.36	19.44
DDIT3	1.06	0.92	5.63804e-06	3.50493e-05	58.82	80.39	7.27	12.78
EXOC5	0.95	0.92	3.25109e-06	2.12075e-05	12.55	13.16	5.45	7.5
DR1	1.13	0.92	3.39074e-05	0.000174469	18.63	22.49	12.73	14.72
NEU3	-0.37	0.92	0.0103594	0.0264255	4.1	3.95	1.36	0.83
FLOT1	1.13	0.92	0.00010568	0.00047899	114.33	139.23	15.45	14.72
SLC2A6	-0.67	0.92	7.89539e-07	5.91436e-06	11.82	18.39	2.73	2.22
SIVA1	1.08	0.92	0.000163247	0.000707022	61.04	102.45	14.55	19.44
TM6SF1	0.46	0.92	0.00417013	0.0122329	0	17	0	1.39
PPP3CC	1.1	0.92	9.40613e-05	0.000431967	83.94	142.62	12.73	20.83
SORD	0.44	0.92	0.00448867	0.0130195	0.89	2.99	0.45	1.39
ABHD15	0.4	0.92	0.00774272	0.0206071	10.95	14.81	2.27	2.5
ELOVL6	1.27	0.92	1.57859e-10	2.41883e-09	7.96	16.42	1.82	5.28
NR1H2	1.03	0.92	0.000247539	0.00102	64.16	86.27	9.55	13.06
AP1S2	0.47	0.92	0.0127935	0.0316392	7.84	19.51	3.64	5.28
NDUFA11	1.02	0.92	5.716e-06	3.54941e-05	11.84	20.28	25.45	27.22
LZIC	1.16	0.91	2.14137e-09	2.69101e-08	9.2	24.71	2.27	6.39
KAT8	0.91	0.91	3.81938e-05	0.000193389	24.35	47.66	3.64	6.39
ANKS3	1.07	0.91	4.48615e-08	4.28887e-07	3.27	11.8	4.09	4.72
HPGD	1.85	0.91	5.56941e-15	1.76269e-13	10.59	22.39	2.73	6.94
BCL2L1	1.07	0.91	1.44444e-05	8.13704e-05	26.14	27.05	7.73	9.17
METTL13	0.87	0.91	1.83017e-06	1.27071e-05	22.4	17.54	3.18	3.06
CCDC61	0.36	0.91	0.0136105	0.0333183	1.03	6.54	0.45	1.94
SNX13	0.88	0.91	1.95421e-05	0.000106366	7.41	8.67	5.45	7.5
TPT1	1.03	0.91	8.66264e-06	5.1572e-05	188.04	226.83	52.73	59.44
NDUFA1	1.04	0.91	8.01824e-05	0.000376319	838.46	1006.05	34.09	40.28
ARHGAP1	1.08	0.91	0.000137908	0.000608428	53.25	67.06	11.82	15.83
GARNL3	-0.39	0.91	0.00751835	0.0200772	2.9	0.46	0.91	0.28
STMN3	0.82	0.91	4.97504e-05	0.000245635	22.99	23.74	6.82	7.5
CARD8	1.16	0.91	2.12415e-05	0.000114773	22.47	20.44	16.82	20.56
VPS29	1.05	0.9	0.00016694	0.000720769	144.78	221.66	24.09	29.72
EPRS	1.22	0.9	8.77513e-06	5.21299e-05	41.28	44.67	11.82	10.56
SDHAF2	0.96	0.9	1.57488e-05	8.79164e-05	14.55	20.64	9.09	11.11
RBM17	0.98	0.9	0.000433615	0.0016831	46.44	55.69	15.45	14.44
GTF3C2	0.74	0.9	3.53202e-05	0.000181067	12.12	8.35	3.64	5.28
CISD3	1.28	0.9	3.43013e-06	2.22828e-05	98.75	82.96	12.27	13.89
POM121	0.63	0.9	0.000640277	0.00236858	4.53	4.73	8.64	7.5
SLC26A6	1.61	0.9	3.00079e-16	1.13387e-14	17.9	17.87	2.73	5.28
XPA	1.06	0.9	4.4725e-05	0.000223304	71.23	74.37	8.64	8.61
DHX29	1.03	0.9	0.000111533	0.000502237	28.45	37.13	9.55	11.67
SEPHS2	1.09	0.9	6.6525e-05	0.000318958	52.81	62.11	5.45	6.11
DNAJB11	1.16	0.9	2.85112e-05	0.000149331	58.1	72.64	31.36	36.39
ELOVL5	0.97	0.9	0.000279349	0.00113632	71.98	58.87	10.91	15.56
C12orf42	0.36	0.9	0.0136427	0.0333898	0.69	4.73	0.45	1.39
CARS	1.21	0.9	4.02789e-06	2.57456e-05	19	24.06	7.73	12.78
MYL6B	0.42	0.9	0.0041087	0.012091	2.6	5.07	1.82	2.22
SSR4	1.05	0.9	0.000132721	0.000587175	134.62	174.89	31.82	34.17
GTF2B	1.05	0.89	0.000167298	0.000721474	68.98	112.33	7.27	8.61
USP28	1.22	0.89	2.83017e-06	1.87667e-05	32.94	25.19	8.18	10.83
COMMD3	0.98	0.89	1.2241e-05	7.0313e-05	14.09	24.94	10.91	14.72
NCKIPSD	-0.85	0.89	1.52817e-07	1.3089e-06	12.49	19.63	1.82	1.94
CCDC14	1.36	0.89	2.2292e-11	3.96227e-10	7.06	8.78	2.73	7.5
PRPF40A	1.07	0.89	0.000179568	0.000769605	48.08	52.9	19.55	20.28
APOL2	1.05	0.89	9.28518e-05	0.000427118	105.22	118.28	24.55	26.67
TRGJ2	0.93	0.89	4.53247e-08	4.32199e-07	86.43	231.83	3.18	6.67
RBM19	1.02	0.89	0.000180537	0.000772867	23.44	56.31	8.18	10.56
TBC1D32	0.43	0.89	0.00636421	0.0174396	3.11	4.39	1.82	3.61
COA4	1	0.89	6.81397e-05	0.000325996	31.23	54.76	4.55	7.22
STOML2	1.12	0.89	8.89661e-05	0.000412145	172.17	216.6	10.45	13.89
FAM162A	1.01	0.89	0.0001652	0.000714924	33.02	51.77	8.64	10.56
UQCRB	1.04	0.89	8.31182e-05	0.000388456	23.59	30.35	20	26.39
VAT1	0.83	0.89	8.9485e-07	6.61843e-06	21.9	19.86	2.27	3.61
HNRNPM	1.11	0.89	0.000123232	0.000548691	73.69	84.98	16.36	21.11
CHD8	1.1	0.89	2.65071e-05	0.000140089	22.34	19.89	11.82	9.72
MARK3	0.65	0.89	0.0157602	0.0376922	30.87	28.81	14.55	11.94
ATP10A	0.5	0.88	0.001945	0.00635499	1.79	5.67	2.73	3.33
NMD3	1.52	0.88	3.79334e-14	1.06955e-12	28.35	29.82	4.09	5.56
NOB1	1.26	0.88	4.72508e-11	7.79954e-10	12.74	37.76	2.73	4.17
ABHD14B	1.02	0.88	0.00029225	0.00118231	46.51	92.95	6.82	11.11
CENPK	1.24	0.88	1.37535e-08	1.4496e-07	17.08	25.3	5.91	6.67
ZNF106	1.23	0.88	8.44247e-06	5.03151e-05	26.99	21.91	15.91	10.83
SERPINB1	1.13	0.88	2.94471e-05	0.00015387	76.18	60.56	12.73	10.83
DDX23	0.61	0.88	0.0207101	0.0475741	28.15	34.38	8.64	8.06
HSD17B8	0.8	0.88	6.45977e-05	0.000310253	52.93	89.03	2.73	4.44
PRF1	0.99	0.88	0.0001896	0.000806072	1006.88	1781.9	45.91	61.94
FAM76A	1.62	0.88	6.08477e-13	1.38233e-11	26.57	38.73	6.82	8.89
TBCC	1.06	0.88	0.000194046	0.000823399	140.82	202.63	13.64	15.83
YY1AP1	1.04	0.88	3.13374e-05	0.000162449	18.6	20.12	8.18	10.56
TSEN15	0.69	0.88	0.0133198	0.0327076	113.11	139.57	11.82	11.67
AVL9	1.02	0.88	0.000101429	0.000462932	9.82	8.8	5.91	9.72
SHKBP1	1.03	0.88	0.000438235	0.00169984	94.03	162.35	13.18	24.17
GIPC1	0.48	0.88	0.00882863	0.023077	10.86	8.75	4.09	3.89
CCNF	0.35	0.88	0.0176257	0.0415191	0.79	3.8	0.91	1.94
C1orf123	2.71	0.88	1.45481e-29	3.36698e-27	31.49	50.22	5.45	8.06
EXOSC4	0.52	0.88	0.00264717	0.00826517	28.01	35.48	2.27	3.33
PTGDS	0.34	0.87	0.0163211	0.0388247	3.9	2.24	0.91	2.5
STK10	1.12	0.87	5.38544e-05	0.000264487	44.25	45.39	23.64	22.78
ARL4C	1.06	0.87	0.000208983	0.000877397	146.86	197.67	22.73	28.89
RTN3	0.97	0.87	0.000352609	0.00139798	19.81	32.46	7.27	10.28
CLN3.1	0.48	0.87	0.00710883	0.0191773	4.08	8.48	14.09	13.06
DUSP12	0.99	0.87	5.8785e-05	0.000286422	60.49	49.78	5	4.17
MOB3A	1.35	0.87	9.50731e-07	6.9823e-06	59.38	90.15	15.45	15.83
PSMD11	1.01	0.87	0.000554713	0.00208609	37.06	60.92	10.91	15.28
RPUSD3	1.06	0.87	0.000230036	0.000957464	48.64	70.52	8.64	13.89
INPPL1	0.98	0.87	1.89452e-05	0.000103523	4.88	8.99	4.09	4.72
SNUPN	0.61	0.87	0.000670811	0.00246756	13.75	18.57	4.55	5.56
SLC25A5	0.98	0.87	0.000451376	0.00174351	199.23	296.08	16.36	23.89
SMIM7	1.01	0.87	0.000120024	0.000535268	31.8	32.87	16.82	14.72
C15orf39	-0.52	0.87	0.00061623	0.00228571	3.04	8.83	3.64	3.33
STAP1	-0.53	0.87	0.000166033	0.000717336	2.98	15.26	0.91	1.67
ORAOV1	0.79	0.87	0.00013112	0.000581019	11.85	16.21	5.45	5.56
TRAV35	0.69	0.87	4.63088e-05	0.000230486	25.38	111.47	0.45	2.78
NXF1	0.97	0.87	0.000561163	0.00210408	45.73	67.1	10	18.61
PHLDB2	0.53	0.87	0.00118168	0.00409588	2.22	5.28	1.36	3.06
FIS1	1.04	0.87	0.000149631	0.000654686	121.94	164.14	17.73	16.94
THUMPD3	0.91	0.87	0.000285467	0.00115781	11.75	21.6	5.45	7.22
RPL6	1	0.87	5.80781e-05	0.000283351	184.13	211.07	45.91	52.78
SDF4	1	0.87	0.000180647	0.00077294	44.7	60.69	16.82	19.44
TRBV9	0.93	0.87	4.5781e-05	0.000228259	169.8	300.15	3.64	3.33
QRSL1	1.19	0.87	2.65852e-09	3.26699e-08	14.01	17.7	4.55	3.89
NUCKS1	1.03	0.87	8.3119e-06	4.96702e-05	12.84	15.69	15.45	18.61
TAF1	1.07	0.86	2.66221e-07	2.18262e-06	14.79	7.46	5.45	5.83
HIGD1A	1.05	0.86	0.000168888	0.000728045	124.14	198.32	10.45	16.67
VRK3	1.12	0.86	1.79045e-06	1.24625e-05	11.9	20.16	7.27	8.89
PLIN2	1.08	0.86	7.51844e-05	0.000355868	41.17	36.36	7.27	7.78
KLHDC4	1.11	0.86	2.07714e-05	0.000112451	13.72	18.44	8.18	10
CALHM2	0.7	0.86	0.0128136	0.0316818	78.06	110.86	11.82	14.72
MPHOSPH8	1.02	0.86	0.000143297	0.000630448	142.55	222.75	35.91	42.5
FBXO8	0.47	0.86	0.00203186	0.00658648	14.99	24.84	2.27	2.5
TTF1	1.92	0.86	2.15659e-15	7.30414e-14	22.14	28.4	4.55	7.5
GPD2	-0.38	0.86	0.00682385	0.0185391	11.04	10.26	3.64	3.06
C14orf80	0.4	0.86	0.0185954	0.0434244	2.44	3.9	2.27	3.61
DGKQ	0.51	0.86	0.00484546	0.0138447	18.1	22.74	3.64	5
NEU1	1.01	0.86	7.65417e-05	0.000361216	65.73	71.72	10.45	11.67
CNPY4	0.97	0.86	2.36664e-05	0.00012646	39.41	31.86	2.73	3.06
MTA2	1.09	0.86	1.69892e-06	1.18924e-05	27.19	26.83	44.55	38.61
EIF5B	1	0.86	0.000198264	0.000838097	37.3	36.65	18.18	21.39
ACAA2	0.9	0.86	0.000980364	0.00346843	31.17	62.49	8.18	14.17
MTPN	1.16	0.86	2.36861e-05	0.000126504	76.15	63.67	13.18	13.61
FAM120B	1.19	0.86	2.06321e-06	1.41396e-05	34.23	40.98	8.18	7.5
WBP2	1.04	0.85	0.000191966	0.000815193	40.85	62.92	12.27	17.22
ZNF75A	1.53	0.85	1.07199e-09	1.41266e-08	14.14	21.2	6.36	8.61
PRPF18	0.98	0.85	6.30566e-06	3.86801e-05	23.32	21.74	8.18	10.28
HEXIM1	0.42	0.85	0.0147349	0.0356389	8.18	5.66	8.18	5.28
ABHD4	0.67	0.85	6.11912e-05	0.000297234	14.44	17.16	0.91	1.67
LYST	1.05	0.85	0.000144546	0.000635441	38.7	40.63	31.36	33.89
CHCHD1	1.08	0.85	7.14532e-06	4.32103e-05	51.37	63.47	6.82	7.78
PTPN9	0.8	0.85	7.86151e-05	0.000369744	20.16	19.1	5.45	6.11
MIF4GD	1.02	0.85	0.000239933	0.000992705	72.27	113.81	8.18	10.56
CELF2	1.01	0.85	0.000161028	0.000698229	61.05	70.22	35	36.67
RCL1	0.58	0.85	0.000574562	0.00214765	7.71	14.65	1.36	2.22
JMJD6	0.97	0.85	0.000532125	0.00201616	39.11	53.92	8.64	13.61
PPIG	1.05	0.85	0.000232947	0.000966681	45.15	47.55	18.64	15.28
GCFC2	1.23	0.85	4.58672e-08	4.36997e-07	9.14	12.12	5.45	7.22
SETD2	1.05	0.85	0.000152854	0.00066721	28.06	42.49	15.91	18.06
REEP2	-0.35	0.85	0.0174571	0.0411656	1.76	4.9	0.91	1.67
SECISBP2	0.69	0.85	0.011465	0.028809	26	31.25	16.36	16.67
RGS9	1.03	0.85	0.000111169	0.000501006	41.1	63.13	10	11.67
CST7	0.96	0.85	3.65077e-05	0.000186209	2241.3	3136.67	60.91	71.39
RPL39L	0.63	0.85	8.68068e-05	0.000403319	14.31	42.77	2.27	2.5
REXO2	1.08	0.85	2.23498e-05	0.00012006	26.43	30.67	5.45	8.06
APOBEC3H	0.54	0.85	0.0139496	0.0339914	64.37	55.84	6.36	5.28
BTN2A2	1.65	0.85	2.09083e-17	9.40364e-16	17.94	21.19	4.09	6.11
GRK5	1.3	0.85	1.01877e-12	2.22348e-11	16.29	12.69	1.82	3.06
PBRM1	1.09	0.85	8.9516e-05	0.000414347	26.2	30.67	13.18	16.94
PAIP2	0.98	0.85	7.63128e-05	0.000360441	90.25	113.13	30	36.94
CWC25	0.94	0.85	0.000824906	0.00296854	72.16	87.71	11.82	13.33
SS18L2	1.07	0.85	6.25475e-05	0.000302261	126.26	186.18	11.36	16.39
ZRSR2	1.06	0.85	8.18827e-05	0.000383327	107.61	93.46	14.55	12.22
CHFR	0.99	0.85	0.000155041	0.00067543	12.79	17.76	8.18	10
C19orf70	0.93	0.85	0.000672451	0.00247114	123.74	189.21	16.36	19.17
TMBIM4.1	0.98	0.85	3.24005e-06	2.11603e-05	12.23	11.93	14.55	18.33
SPIN2B	0.63	0.85	0.000151916	0.000664163	9.48	17.34	2.27	2.78
C16orf52	0.39	0.85	0.00933968	0.0242021	0.58	2.66	0.91	1.11
SGPL1	0.95	0.84	1.91401e-06	1.32111e-05	23.89	26.98	6.36	6.39
PSMB3	1.07	0.84	0.000137322	0.000606083	528.02	623.68	25.45	29.17
TBP	0.96	0.84	0.00022278	0.000931101	50.9	80.43	10.91	10.56
SOD1	1	0.84	0.000429558	0.00166794	335.89	487.68	30	32.5
VWA8	-0.64	0.84	6.28907e-05	0.000303498	9.79	5.5	5.45	2.22
FAM118A	1.38	0.84	3.21204e-07	2.59888e-06	65.53	53	20.45	16.11
MLX	1.11	0.84	0.000111362	0.000501671	90.76	76.35	14.09	13.89
HMGCL	1.02	0.84	2.68945e-05	0.000141732	26.06	20.24	4.09	5
C18orf32	0.9	0.84	4.08013e-07	3.21462e-06	7.81	10.51	5	9.72
BDP1	1.07	0.84	0.000108547	0.000490579	26.88	28.9	16.36	19.17
TWF2	0.99	0.84	1.6729e-05	9.2736e-05	50.17	69.54	15.45	20.83
UBA2	0.7	0.84	0.00723724	0.0194622	42.79	50.24	8.64	11.11
TMEM160	1.01	0.84	8.71032e-05	0.000404527	348.37	433.42	22.27	29.72
TMEM55B	0.85	0.84	0.00130155	0.00445437	34.33	34.5	4.09	5.56
YIF1A	1.13	0.84	6.19353e-05	0.000300192	106.75	134.64	10	11.67
PRKRIP1	-0.57	0.84	0.0120176	0.0299941	16.56	25.96	4.55	6.67
LBH	1.01	0.84	0.000144953	0.00063698	48.87	60.89	17.27	21.39
MRPL44	0.61	0.84	0.0139808	0.0340523	46.83	46.96	5	4.72
TMEM248	0.97	0.84	0.000378091	0.00148838	37.86	53.4	13.18	14.72
DCP1B	1.23	0.84	2.7867e-09	3.4094e-08	36.49	32.22	5.45	5.83
POLR2K	1.03	0.84	0.000242729	0.00100301	113.65	158.12	8.64	13.33
SRSF1	1.01	0.84	0.000202525	0.000853509	83.31	86.72	15.91	20.56
CDC42	1	0.84	0.000248723	0.00102411	126.36	182.32	25.91	35
DNAJB2	0.93	0.84	2.10933e-06	1.43846e-05	3.37	5.1	5.91	6.11
NELFB	0.5	0.84	0.00445821	0.0129446	7.24	24.66	2.73	3.89
COX7B	1.02	0.84	0.000205604	0.000865499	97.78	122.98	18.18	24.17
SIRT2	0.93	0.84	0.00119169	0.004128	44.81	63.79	12.27	18.06
UBA52	0.97	0.84	0.000101701	0.000463803	121.38	139.85	47.73	52.5
DYNLRB1	0.72	0.84	0.00288711	0.00890915	36.35	48.75	10	10.56
C21orf59	0.88	0.84	8.66545e-05	0.00040278	12.13	17.8	11.82	8.61
UBE2L3	1.04	0.84	0.000149525	0.000654479	76.65	91.79	16.82	20.28
DZANK1	0.44	0.84	0.00410621	0.0120869	0.49	2.34	0.45	1.39
HIST1H4D	-0.32	0.84	0.0181459	0.0425285	8.43	29.41	0.45	0.28
C17orf58	0.36	0.84	0.0117463	0.029436	6.69	7.1	1.36	1.11
ZNF780B	0.45	0.83	0.0114567	0.0287948	6.84	2.68	3.64	3.61
PPFIA1	0.87	0.83	1.98653e-06	1.36646e-05	5.84	7.04	5	6.39
CHST14	0.38	0.83	0.0130643	0.0321728	0.23	3.83	0.45	1.67
TRBV7-3	1.44	0.83	5.12196e-11	8.42961e-10	148.52	706.47	7.73	16.94
RBM22	0.89	0.83	0.000114587	0.000514739	44.96	41.13	5.45	7.78
TXN	0.98	0.83	0.000153226	0.000668309	203.21	241.61	21.36	24.44
ZNF544	-0.63	0.83	3.46113e-05	0.000177679	3.93	6.46	3.64	2.5
CXCR4	1.05	0.83	0.000396356	0.00155422	530.01	702.16	22.27	32.78
ZEB2	1.02	0.83	0.000172266	0.000740884	14.21	18.01	10.45	16.11
FIG4	-0.71	0.83	2.00559e-05	0.00010879	19.14	28.65	4.09	4.17
CAPZB	0.94	0.83	0.000220243	0.000921189	253.77	344.16	43.64	53.89
NR2C2AP	0.89	0.83	2.70521e-07	2.21297e-06	13.64	36.28	2.27	3.61
SAT1	1.03	0.83	0.000329426	0.00131687	403.44	444.37	33.64	33.61
TXLNG	0.86	0.83	6.67258e-06	4.06391e-05	14.38	22.72	3.18	4.17
NUTF2	1.08	0.83	6.9526e-05	0.000331629	62.69	65.23	16.82	15.56
C1GALT1	1.93	0.83	8.99928e-13	1.98753e-11	36.68	36.28	7.27	12.5
IFI16	1.01	0.83	0.000146992	0.000644595	118.2	138.34	33.64	37.5
HSD17B7	0.94	0.83	0.000240389	0.000994224	21.03	32.95	8.18	9.72
NPIPB11	0.58	0.83	0.000242784	0.00100301	3.17	6.05	7.73	10.56
ATRIP	1.01	0.83	2.75297e-08	2.7233e-07	19.59	23.5	1.82	2.78
NEK7	0.97	0.83	2.29673e-05	0.000123198	23.2	12.23	11.36	9.72
PARP3	0.54	0.83	0.000743744	0.0027045	8.41	23.79	0.91	2.22
ELF2	1.02	0.83	0.00015565	0.000677395	28.74	26.1	10.91	8.89
ITGA4	1.02	0.83	0.000361707	0.00142997	67.13	84.68	21.82	28.33
EMC7	1.07	0.83	0.000140469	0.000618745	156.45	207.31	10.91	13.61
UCKL1	2.58	0.83	1.26955e-26	1.93198e-24	40.52	56.47	6.82	8.89
PYCARD	0.94	0.83	0.000146572	0.000643077	64.49	93.36	11.82	18.06
GAPVD1	1.36	0.83	1.96444e-08	1.99661e-07	14.91	19.2	8.64	10
MAF	1.02	0.82	2.3035e-05	0.000123442	15.4	11.74	7.73	8.61
IDH2	0.97	0.82	0.00054369	0.0020488	412.33	621.38	34.55	42.5
ZNF800	0.98	0.82	0.000304079	0.00122703	25.44	38.24	10	9.17
AGPAT6	0.49	0.82	0.00425899	0.0124705	5.33	4.82	4.09	5.56
LRR1	0.53	0.82	0.00272426	0.00847488	20.88	22.98	2.73	3.33
DDB2	0.96	0.82	0.000509044	0.00194074	121.66	155.54	11.82	13.61
ACAT1	0.93	0.82	2.10777e-06	1.43828e-05	14.09	22.75	5.91	4.72
AAED1	1.04	0.82	3.49281e-05	0.000179139	31.27	40.1	7.73	11.94
P4HTM	0.56	0.82	0.0150127	0.03624	28.52	25.56	8.18	7.78
POLR1C	1	0.82	1.68834e-09	2.15584e-08	23.4	15.89	3.64	3.89
MTCH1	0.98	0.82	0.000626262	0.00231905	141.77	170.76	18.18	25.83
SLFN11	0.62	0.82	0.00694824	0.0188172	25.39	21.04	8.18	5.83
PSME2	0.95	0.82	0.000272119	0.00111098	474.61	631.08	45.91	57.22
SYTL1	1.01	0.82	0.000280783	0.0011409	59.87	72.49	14.55	20
WDR36	0.72	0.82	2.36115e-05	0.000126288	5.39	8	3.64	5.83
SPRED2	-0.37	0.82	0.00545036	0.0152822	0.74	3.13	1.36	0.56
ZNF146	1.71	0.82	6.86219e-11	1.10964e-09	43.94	49.56	10.45	9.44
ANKZF1	0.85	0.82	0.00213594	0.00687973	37.31	48.59	10.91	9.72
KLRB1	0.99	0.82	0.000426403	0.00165742	251.54	280.27	14.55	16.39
CRCP	0.67	0.82	0.00130105	0.00445403	23.92	26.24	8.64	9.17
C17orf80	0.68	0.82	0.000362374	0.00143107	10.27	12.51	4.09	5
SDHA	0.95	0.82	0.00121225	0.00419137	61.07	83.55	19.09	27.22
LIX1L	1.62	0.82	5.44768e-11	8.87537e-10	24.71	40.78	9.55	17.22
U2SURP	0.97	0.82	0.000410689	0.00160307	26.81	30.57	20.45	20.83
MORC3	0.91	0.82	0.000836569	0.00300564	29.68	39.19	12.73	12.5
ATP6V0A2	1	0.82	0.000226125	0.000943157	13.53	15.13	10.91	9.17
U2AF2	0.43	0.82	0.00844474	0.0222358	4.39	5.09	4.55	5.28
RPS4Y1	0.87	0.82	0.00066028	0.00243366	72.82	91.05	10.91	11.11
YWHAQ	0.98	0.82	0.000666946	0.0024566	315.18	411.97	27.73	31.94
PXK	1.32	0.82	1.87494e-10	2.84545e-09	18.69	27.43	3.64	5.83
HNRNPU	0.98	0.82	0.000372622	0.00146789	50.81	56.03	30.91	27.5
ZNF154	-0.52	0.82	0.000132207	0.000585134	5.2	5.51	1.36	0.83
RAB8B	2.1	0.82	6.19295e-16	2.27806e-14	34.46	38.19	11.36	17.22
NUDT5	1.05	0.82	0.000114113	0.000513025	47.85	56.27	15	17.22
ZMYND8	1.56	0.82	2.54271e-10	3.77129e-09	13.16	23.7	11.82	12.78
TRDC	0.98	0.81	0.000424978	0.00165246	250.06	421.56	6.36	10
AKIRIN2	0.98	0.81	0.000434624	0.00168643	151.27	184.01	19.55	17.5
SCLY	0.63	0.81	1.92772e-05	0.00010513	0.44	1.43	1.36	3.33
MIIP	1.07	0.81	8.46213e-05	0.000394651	85.2	94.6	9.55	11.39
SEC14L2	-0.5	0.81	0.00127674	0.00438529	4.69	5.48	2.73	2.22
IKZF2	0.42	0.81	0.0175335	0.0413283	4.11	5.78	5	4.72
NAP1L1	1.12	0.81	3.4568e-05	0.000177539	33.17	24.86	15.91	14.17
OPTN	0.94	0.81	0.000422389	0.00164354	78.52	90.78	29.09	33.61
PHC3	1.1	0.81	2.90785e-05	0.00015223	12.87	13.96	15.91	21.39
MARCKSL1	0.48	0.81	0.00790191	0.0209654	35.32	37.16	3.18	4.17
CWF19L1	0.41	0.81	0.0152748	0.0367583	12.92	9.06	3.64	4.44
VEZF1	1.13	0.81	1.6308e-05	9.06734e-05	35.1	30.83	7.27	8.33
RPS13	0.93	0.81	0.000119037	0.000531932	480.41	575.64	52.27	57.5
ITGB1	0.9	0.81	0.000302829	0.00122287	75.15	69.31	30	41.39
RAN	0.99	0.81	0.000538857	0.00203403	146.4	192.81	21.36	31.39
GNB5	0.53	0.81	0.0144848	0.0351183	13.04	16.23	5.91	7.78
NAE1	0.98	0.81	0.000460965	0.00177808	40.72	65.28	12.73	11.94
RNF114	1	0.81	0.000331915	0.00132539	80.23	84.72	8.64	8.89
TP73	0.53	0.81	0.00107202	0.00374971	1.23	5.22	0.91	1.67
UPF3A	0.71	0.81	0.00363151	0.0108769	35.57	40.94	12.73	12.22
MAP4K2	1.36	0.81	2.17592e-10	3.25333e-09	9.87	17.58	4.55	5.83
NINJ1	0.67	0.81	0.00191865	0.00628368	49.57	98.81	4.09	6.11
PFN1	0.85	0.81	1.8326e-08	1.88503e-07	1936.24	2461.5	90.45	93.61
KIAA1324	0.7	0.81	7.20275e-05	0.000342385	2.64	6.63	1.82	3.33
IMPDH2	0.91	0.81	0.00062237	0.00230541	33.75	49.02	5	6.67
HMBOX1	1.16	0.81	5.35825e-09	6.21344e-08	24.8	24.37	5.91	5.56
KIAA0195	0.9	0.81	1.4541e-05	8.18319e-05	12.27	11.46	5.91	7.22
GAPDH	0.91	0.81	3.09284e-05	0.000160628	1249.64	1659.99	68.64	79.44
RPL30	0.88	0.81	5.7548e-06	3.57151e-05	71.52	80.18	61.82	64.72
MT2A	0.95	0.8	0.00021718	0.000909061	347.52	432.55	36.82	38.33
CD320	0.99	0.8	0.000239591	0.00099203	72.41	85.48	8.64	8.61
TRAJ43	0.52	0.8	0.000340439	0.00135359	105.31	206.43	2.27	3.61
FAM179B	-0.65	0.8	7.98166e-06	4.77996e-05	10.45	8.45	4.55	3.33
SPRYD7	-0.4	0.8	0.00646669	0.0176811	11.05	9.82	3.18	1.39
MT1E	1.27	0.8	3.08587e-09	3.75065e-08	50.24	27.17	5.45	3.06
XPO6	0.61	0.8	0.00561022	0.0156632	19.38	19.26	9.55	8.89
HDAC1	1.04	0.8	0.000268616	0.0010995	79.32	77.55	8.64	15.56
GATA3	0.95	0.8	0.000579158	0.00216047	67.61	117.87	14.09	19.17
SFXN1	1.06	0.8	0.000138049	0.000608808	72.22	59.83	22.27	23.06
TMEM258	0.9	0.8	0.000539547	0.00203595	75.02	118.93	22.27	30
TRIM68	0.78	0.8	3.45953e-06	2.24093e-05	11.84	9.41	1.36	3.06
LAMTOR4	0.92	0.8	0.000722817	0.00263185	252.39	361.38	27.73	33.61
ST7L	0.65	0.8	0.000100453	0.000458853	4.48	2.84	3.18	3.61
MIEF1	0.42	0.8	0.0202406	0.0466403	8.31	8.55	3.18	4.44
TMEM9B	1.07	0.8	0.000239795	0.000992503	151.06	128.81	13.64	14.72
HMGN5	0.73	0.8	1.23282e-06	8.84144e-06	3.36	2.77	0.45	1.11
DIXDC1	0.49	0.8	0.00195904	0.0063896	6.63	5.62	1.82	2.22
TMEM9	1.48	0.8	2.14249e-14	6.24695e-13	16.91	28.58	2.73	5.28
FAM200A	0.59	0.8	0.000155709	0.000677395	8.02	12.19	1.82	3.33
IRF5	0.88	0.8	1.82702e-06	1.26931e-05	7.11	29.75	1.36	2.5
PSTPIP1	1.02	0.8	0.000311565	0.0012545	109.26	142.95	21.36	22.5
FNBP1	0.92	0.8	0.000497762	0.00190409	94.16	119.58	42.27	40
GPSM3	0.93	0.8	0.000214405	0.000898462	235.09	270.04	33.18	41.11
UBE2D2	0.9	0.8	0.000756915	0.00274521	126.03	168.67	29.09	35.83
CPNE7	1.08	0.8	4.55164e-05	0.00022705	87.42	54.42	12.27	10.28
VAMP4	0.9	0.8	0.000474696	0.00182534	14.99	23.28	7.27	7.22
S100A4	0.89	0.8	3.28323e-05	0.000169643	2780.96	3480.05	70.91	78.89
B3GALNT2	-0.37	0.8	0.0121127	0.0301704	5.53	3.22	1.82	1.67
ELAVL1	0.9	0.8	0.0003322	0.00132606	15.45	23.06	10.45	14.17
NELL2	0.85	0.8	0.00236132	0.00751199	68.9	100.48	15.91	19.17
ZC3H4	0.93	0.8	0.000271069	0.00110751	21.93	21.3	13.18	14.72
LMBRD2	0.8	0.8	5.03852e-06	3.15874e-05	16.56	8.92	3.18	4.72
CAPN2	1.02	0.8	0.000329978	0.00131813	58.32	77.55	24.55	25.56
ZNF638	1.05	0.8	0.000155736	0.000677395	18.69	20.38	14.55	15.83
DCUN1D5	1.04	0.79	9.92234e-05	0.000453797	72.44	87.33	7.73	8.61
UBL5	0.91	0.79	0.000246957	0.00101798	392.65	440.51	46.36	51.39
SELPLG	0.98	0.79	0.000546533	0.00205828	623.36	895.49	35	48.61
NUBP2	1.12	0.79	7.41816e-05	0.000351422	60.36	63.6	12.27	14.17
CPNE3	1.95	0.79	1.06564e-12	2.31214e-11	36.08	41.66	5.91	10.28
VAC14	0.94	0.79	0.000797802	0.00288033	29.23	27.13	7.27	8.06
TRAF3IP2	0.43	0.79	0.00300342	0.00921175	1.55	2.55	0.45	1.67
C14orf1	0.72	0.79	0.00336203	0.0101464	67.09	91.2	8.18	7.5
SRGN	0.91	0.79	8.85586e-05	0.0004106	1789.95	2341.77	62.73	70.56
IBTK	0.67	0.79	0.000537619	0.00203143	14.7	15.66	6.82	5.83
ARFGAP2	1.04	0.79	0.000257418	0.00105717	49.37	48.85	8.18	11.11
PEX1	0.77	0.79	0.000276541	0.00112655	12.05	18.67	4.55	8.89
RASSF3	0.62	0.79	0.00857361	0.022525	29.68	33.45	12.73	15.56
EIF1B	0.96	0.79	0.000208086	0.000874292	69.04	88.4	11.82	13.06
SYNGR3	0.42	0.79	0.0138464	0.0337917	7.92	18.72	1.82	3.61
GTF3A	0.91	0.79	0.00117891	0.00408754	168.84	237.06	24.55	31.67
HCLS1	0.92	0.79	0.000926337	0.00330253	263.36	322.57	39.09	42.5
NELFA	0.9	0.79	3.41183e-06	2.21779e-05	7.18	8.28	2.73	4.17
LAT2	0.86	0.79	0.00115594	0.00401417	35.66	49.18	5.45	7.22
TXNDC16	-0.52	0.79	0.000103392	0.000470344	3.19	1.05	2.27	0.83
PDZD4	0.35	0.79	0.0152147	0.0366558	0	2.53	0	1.39
SPATA2L	0.47	0.79	0.00223568	0.00716773	16.17	18.69	2.27	3.06
CYLD	1.8	0.79	1.14996e-11	2.13271e-10	28.55	27	18.18	22.78
FLII	0.82	0.79	0.00158182	0.00528703	36.36	33.82	12.73	17.22
HSP90AA1	0.9	0.79	0.00145403	0.00491116	237.02	303.11	40.45	44.17
RPS6KA3	1.09	0.79	3.40653e-06	2.21564e-05	9.17	13.74	12.27	10
MRPL2	1.52	0.79	3.06338e-12	6.14279e-11	28.78	41.82	4.09	7.22
ST8SIA4	0.99	0.79	0.00039171	0.00153763	37.09	36.68	12.27	13.33
IL4R	0.95	0.79	0.000755286	0.00274109	53.62	47.37	12.27	16.39
TRAV38-1	0.61	0.78	0.000202456	0.000853509	87.2	91.21	1.36	2.78
PPM1B	0.96	0.78	0.000316667	0.0012709	24.73	22.47	10	10
HERPUD1	0.94	0.78	0.00160165	0.00534638	143.87	223.8	20	22.78
GZMM	0.92	0.78	0.000806231	0.00290982	464.77	588.85	24.55	29.72
MED17	0.92	0.78	0.000419466	0.00163446	12.16	15.28	8.64	8.06
GPX1	0.75	0.78	0.00214154	0.00689576	65.65	74.57	5.45	7.5
ZNF444	0.52	0.78	0.0092047	0.0239305	3.4	8.1	2.73	5.28
CNOT1	0.87	0.78	0.00106209	0.0037185	14.99	20.51	12.73	12.78
GOLIM4	1.15	0.78	1.58536e-05	8.8368e-05	42.69	58.92	14.55	15.28
PSMD4	0.91	0.78	0.00178107	0.00589567	123.42	218.36	15	21.39
ELOVL1	0.99	0.78	0.000843215	0.00302756	150.07	197.87	10	12.22
GPR65	0.98	0.78	0.000186039	0.000793056	71.03	68.01	11.36	11.11
NAT10	0.56	0.78	0.00158372	0.00529128	5.68	9.98	4.09	4.17
MTERFD2	1.89	0.78	2.39189e-14	6.95591e-13	14.38	13.16	5.45	8.33
ARHGAP25	0.94	0.78	0.00127182	0.00437148	91.7	121.96	22.27	23.06
DPP8	1.1	0.78	8.22022e-05	0.000384661	38.7	23.51	12.73	9.72
MAP4K1	0.96	0.78	0.000461369	0.00177902	99.24	130.83	25	27.22
NOL10	0.94	0.78	1.87373e-05	0.000102437	39.82	40.61	5.45	6.67
DDX24	0.92	0.78	0.000794439	0.00286912	92.62	120.74	27.27	34.72
TCEB1	0.89	0.78	0.000571088	0.00213782	37.95	47.65	18.18	21.11
BCS1L	0.76	0.78	0.000263603	0.00108018	33.72	42.52	4.09	4.17
GABARAPL2	0.97	0.78	0.000634647	0.00234853	100.46	128.04	14.09	17.22
TXNDC12	0.96	0.78	0.000858996	0.00307528	97.62	130.92	18.64	18.61
C19orf43	0.93	0.78	0.000490004	0.001879	223.4	258.15	21.82	26.67
CDK5	1	0.78	1.13391e-08	1.223e-07	9.46	23.9	0.91	3.33
TSEN34	0.99	0.78	0.00011848	0.000530013	35.04	41.6	5.45	4.17
CHML	-0.47	0.78	0.000523868	0.00198691	0.98	3.49	0.91	0.83
SLC25A17	0.59	0.78	0.000397924	0.00155982	13.91	14.72	3.64	3.89
SMIM20	2.11	0.78	4.84883e-25	6.33714e-23	48.52	50.44	2.73	4.72
LGALS1	0.99	0.78	0.000308538	0.00124322	486.68	678.87	27.73	35.83
EPSTI1	0.99	0.78	0.000119255	0.000532691	40.42	42.35	9.55	13.33
EIF3F	1.04	0.78	0.000421502	0.00164067	46.26	44.51	14.55	11.94
CTDSPL2	0.92	0.78	0.000198213	0.000838097	8.28	13.09	10	13.33
TAOK2	0.42	0.78	0.0035089	0.0105466	2.61	1.86	1.82	3.33
KPNA1	0.86	0.77	0.000681379	0.00250173	17.21	14.5	12.73	9.44
ZNF511	0.85	0.77	0.000480981	0.00184823	22.16	29.96	6.82	6.94
SF3A1	0.89	0.77	0.000995796	0.00351631	32.49	36.72	12.27	16.39
ATP5J2	0.88	0.77	7.31876e-05	0.000347157	46.82	48.41	29.09	32.78
DSCR3	0.94	0.77	0.000577268	0.00215559	26.78	25.92	12.73	11.67
CYC1	0.86	0.77	0.00306924	0.00938515	190.43	316.23	11.82	21.39
MORF4L2	0.82	0.77	0.00238029	0.00757019	72.34	65.54	14.09	14.72
SAMD3	0.95	0.77	0.000516339	0.00196304	72.6	78.01	26.82	25.28
SH3YL1	0.9	0.77	8.11091e-08	7.42208e-07	3.22	5.66	1.82	3.06
DOCK2	1.05	0.77	9.20325e-05	0.0004237	19.56	19.83	16.82	17.78
RPS11	0.88	0.77	0.000249636	0.0010275	694.06	927.58	55.45	59.17
EIF2B2	0.86	0.77	0.000373751	0.00147182	18.66	40.05	1.82	4.72
FBXL20	0.54	0.77	0.00548389	0.0153646	29.77	25.45	5.91	5.83
SDF2L1	0.96	0.77	0.000556128	0.0020907	244.45	341.03	12.73	18.06
CFL1	0.84	0.77	3.86915e-06	2.48166e-05	396.17	460.35	76.82	86.39
CHN1	0.61	0.77	0.00190789	0.00625028	15.53	21.64	4.09	4.72
FANCD2	1.18	0.77	3.62442e-07	2.89043e-06	6.67	11.55	5.91	7.5
NDUFA5	1.02	0.77	0.000184544	0.000787591	19.8	22.12	10.45	10.83
PHF21A	0.64	0.77	0.00190548	0.00624608	7.67	7.93	6.36	7.22
RAVER1	0.94	0.77	4.01187e-06	2.56579e-05	9.98	13.76	6.36	8.33
RPS21	0.91	0.77	0.000102063	0.000465253	477.92	482.18	50.91	50.56
OSTF1	0.93	0.77	0.00095834	0.00339809	419.22	448.11	30.45	27.78
LRRC8C	0.62	0.77	0.00170596	0.00566054	7.38	5.78	5	5
AGA	-1.17	0.77	2.01116e-10	3.01919e-09	44.61	49.04	5.45	4.44
SORL1	0.94	0.77	0.000495481	0.00189672	9.45	12.29	9.55	11.67
CYB561A3	2.93	0.77	5.68109e-32	1.91246e-29	7.66	8.8	4.09	6.39
ZNF652	1.14	0.77	1.00018e-08	1.09146e-07	8.88	11.06	7.73	8.89
ZNF213	-0.4	0.77	0.00845597	0.02226	2.66	3.78	1.36	1.94
CSNK1A1	0.89	0.77	0.00115954	0.00402415	27.02	30.41	16.36	14.17
MEAF6	0.87	0.77	0.00168902	0.00561103	66.22	113.79	13.18	18.33
LMBR1	0.8	0.77	0.000149425	0.000654301	8.67	11.07	7.27	6.94
ANKRD28	1.05	0.77	3.17165e-05	0.000164261	10.03	19.71	9.55	14.17
TRBV23-1	0.61	0.77	0.000997884	0.00352212	0	424.42	0	1.94
SURF2	0.78	0.77	0.000290132	0.00117502	100.87	106.44	5.45	7.78
NDE1	1.94	0.77	1.56833e-16	6.17823e-15	13.03	13.09	5.91	8.89
POLR3E	1.41	0.77	5.17188e-10	7.13719e-09	11.01	23.3	5.91	8.33
HSP90B1	0.88	0.77	0.00124584	0.00429288	166.78	234.03	32.73	43.61
DIAPH1	0.9	0.77	0.00140167	0.00475745	48.82	72.8	20.91	21.94
BLOC1S2	0.88	0.77	0.0012273	0.00423681	80.76	97.59	10	12.78
EIF5A2	0.44	0.77	0.00339167	0.0102219	3.78	7.93	1.82	2.22
TSC22D4	0.87	0.77	0.000165413	0.000715564	40.32	38.34	30.91	28.33
GLRX	0.88	0.77	0.00137168	0.00467281	28.33	40.08	8.18	13.89
PARP15	0.93	0.76	0.000975875	0.00345475	59.66	70.06	18.18	20
TBC1D2B	0.99	0.76	8.35489e-05	0.000390141	17.58	19.32	10	9.44
RNF10	1	0.76	0.000230392	0.000957869	38.65	51.58	12.27	16.39
GMPR2	0.82	0.76	0.00253817	0.00798993	35.5	55.94	5.45	8.61
TGFBR3	1.06	0.76	6.45047e-05	0.000309941	35.49	24.14	10.91	13.61
NFKBIA	0.89	0.76	0.00260019	0.00815514	479.33	844.86	33.64	37.5
KNTC1	0.44	0.76	0.00661291	0.0180347	2.87	5.5	1.36	1.94
DOK2	0.9	0.76	0.00196821	0.00640822	311.94	363.09	24.55	27.22
COX5B	0.93	0.76	0.000720764	0.00262573	387.93	419.67	28.18	32.78
RAD9A	0.5	0.76	0.00469856	0.0135189	8	22.4	4.55	4.72
ITK	0.89	0.76	0.00157839	0.00527826	58.63	59.51	23.18	23.61
NDC80	1.08	0.76	1.35658e-08	1.43117e-07	8.74	20.96	2.27	5.28
STAT5B	2.22	0.76	2.90577e-19	1.75436e-17	29	23.36	10	7.5
GTF2E2	0.64	0.76	0.0155678	0.0373205	65.97	98.34	10.45	10.28
ACOT9	2.48	0.76	1.68257e-27	3.01478e-25	17.23	24.86	4.55	6.11
ACCS	1	0.76	1.28014e-08	1.36348e-07	5.28	8.92	0.91	2.78
FGFRL1	-0.72	0.76	7.65231e-06	4.59759e-05	12	6.78	2.73	1.39
CEP57	0.86	0.76	0.00162745	0.00542436	29.12	32	10.91	12.22
GTF2IRD2	0.81	0.76	5.05753e-06	3.16708e-05	3.85	2.9	11.36	9.44
RARRES3	0.93	0.76	0.000742752	0.00270178	747.6	1069.46	34.55	43.89
MPDU1	0.87	0.76	0.000519918	0.0019753	21.36	40.09	5.45	8.06
STK17B	0.85	0.76	0.000195639	0.000829206	292.67	309.56	67.73	70.56
SLC35C2	0.93	0.76	0.000532792	0.00201731	33.03	38.46	5.91	8.06
GLRX3	0.94	0.76	0.000480838	0.00184823	58.4	75.03	9.09	8.61
ITPRIP	0.9	0.76	7.55254e-05	0.000357178	8.13	18.75	7.73	5.56
CARD16	0.82	0.76	0.002531	0.0079754	181.25	236.84	16.82	25
SCAF4	2.18	0.76	1.2661e-16	5.09604e-15	28.3	35.85	5.45	12.22
THEM4	-0.67	0.76	0.000173596	0.00074545	18.25	20.12	5.45	4.44
ACD	1.96	0.76	1.58259e-12	3.2985e-11	60.6	105.62	6.36	11.67
ATP5O	0.87	0.76	0.000145351	0.000638442	28.12	28.83	20.45	20.83
RAB4B	0.88	0.76	0.000108887	0.000491716	17.69	30.43	12.27	14.17
ERGIC3	1	0.76	0.000533878	0.00202005	36.45	56.38	10	12.22
SLC35F6	0.7	0.76	0.000992092	0.00350434	37.94	29.69	5.91	7.22
TSPAN17	1.01	0.76	3.77406e-07	2.99258e-06	25.96	13.42	5.45	4.72
WDR33	1.19	0.76	4.69095e-05	0.000232745	34.73	30.11	15.45	14.44
STARD4	-0.55	0.76	0.000146118	0.000641337	5.13	8.95	4.55	2.5
RPL37	0.84	0.76	5.26294e-05	0.000258928	107.53	106.69	65.91	69.72
PTGES3	0.89	0.76	0.00150863	0.00507707	137.41	198.75	23.64	28.61
HLA-DPA1	0.92	0.75	0.00147322	0.00497102	219.3	243.37	32.27	36.11
ARPC2	0.83	0.75	0.000182611	0.000780541	554.21	708.41	66.82	78.89
MAP3K4	1.09	0.75	2.42244e-09	3.01354e-08	8.08	7.45	4.09	6.67
GIMAP6	0.88	0.75	0.00190062	0.00623307	65.44	102.17	9.09	12.5
ZNF44	-0.71	0.75	2.47273e-05	0.000131622	27.33	22.13	5.91	3.06
TIPRL	1.86	0.75	2.19149e-12	4.49174e-11	68.5	95.99	7.27	11.11
UQCRFS1	0.86	0.75	0.00195665	0.00638367	202.07	258.37	18.18	20
MALSU1	0.52	0.75	0.000547738	0.00206195	4.29	9.32	1.36	3.61
C12orf75	0.87	0.75	0.00211458	0.00682081	216.48	294.02	25.91	31.39
ATG4B	2.45	0.75	5.359e-19	3.13332e-17	23.58	58.5	6.36	14.17
FGFR1OP2	0.91	0.75	0.00111973	0.00389572	44.71	44.2	17.27	14.17
PKM	0.88	0.75	0.0014755	0.00497486	96.66	131.54	36.36	41.11
ABHD14A	0.86	0.75	0.000586186	0.00218448	40.16	56.43	7.27	9.44
OSBPL8	0.98	0.75	0.000261766	0.00107384	21.52	23.42	15.45	16.94
LARP1	0.72	0.75	0.00463556	0.0133653	18.92	17.26	11.36	8.33
SENP6	0.83	0.75	0.00142633	0.00482787	13.67	15.7	11.36	13.61
ZNF490	0.34	0.75	0.0196347	0.04548	2.16	3.94	0.91	1.67
ADA	0.98	0.75	0.000510073	0.00194388	112.33	138.7	11.82	14.44
ICAM2	0.91	0.75	0.000137015	0.000604966	18.28	27.69	4.55	8.06
PAPOLA	0.96	0.75	0.000573001	0.00214253	34.2	39.69	21.82	26.94
RAB7L1	0.92	0.75	0.00131245	0.00448894	89.45	101.38	15.91	13.61
PUF60	0.94	0.75	0.00130661	0.00447031	110.14	123.4	20	23.33
MRPL48	0.8	0.75	3.17164e-05	0.000164261	24.6	30.5	5.45	5
DAK	1.14	0.75	2.1867e-09	2.73559e-08	7.26	13.76	3.64	5.28
FUBP1	0.92	0.75	0.000522826	0.00198394	53.88	51.25	24.09	23.06
EIF5	0.88	0.75	0.00215028	0.0069219	62.18	82.81	23.18	27.78
OSBPL11	0.58	0.75	0.000700127	0.00256521	10.74	10.44	3.18	4.44
ABCF1	0.9	0.75	0.000585665	0.00218327	33.62	37.48	15.91	13.61
EIF5A	0.78	0.75	0.000428567	0.00166467	141.51	186.8	56.36	66.11
TUBA1C	1.52	0.74	5.06832e-15	1.61793e-13	4.29	8.63	4.55	10.56
DDX26B	0.99	0.74	4.95875e-06	3.11224e-05	32.51	14.33	6.36	6.94
COPB1	0.88	0.74	0.000714616	0.00260712	47.98	36.93	11.82	14.72
SRP72	0.88	0.74	0.00231814	0.00739578	68.89	93.94	11.36	14.72
SRPK2	0.82	0.74	0.00257994	0.00810306	39.47	57.83	12.27	14.17
LITAF	0.82	0.74	0.00431616	0.0126014	176.03	232.41	25	33.61
PSMA5	0.84	0.74	0.0032001	0.00972065	61.8	88.65	16.36	24.44
MZT2A	0.86	0.74	0.000947166	0.00336598	34.65	50.02	12.73	14.44
PSMG2	1.47	0.74	5.78522e-08	5.44183e-07	60.17	82.23	6.82	11.94
SNW1	1.01	0.74	0.000345906	0.00137336	118.4	131.99	11.36	15
LCK	0.85	0.74	0.000950107	0.00337104	1000.86	1423.67	51.82	66.67
EBPL	0.8	0.74	2.96193e-06	1.95508e-05	11.15	29.18	1.82	3.61
SGMS1	1.2	0.74	1.00221e-06	7.3178e-06	19.05	35	8.18	9.17
TPI1	0.84	0.74	0.00243053	0.00769471	752.94	1192.76	43.18	53.33
LLPH	0.53	0.74	0.00794939	0.0210663	21.97	52.97	5.91	8.61
LEPROTL1	0.91	0.74	0.00101678	0.00358244	111.84	116.48	30	29.72
TCHP	0.83	0.74	0.000447432	0.00173189	7.78	7.74	3.64	8.06
MRI1	0.88	0.74	8.90844e-06	5.28371e-05	11.09	29.58	5	6.67
SLA2	0.91	0.74	0.00154904	0.00519889	160.2	184.99	16.36	21.11
SIPA1L1	1.14	0.74	1.10433e-05	6.3896e-05	12.83	14.79	8.64	12.5
PTBP3	1.36	0.73	4.26075e-08	4.09807e-07	24.17	20.48	11.36	10.83
RABL2B	0.87	0.73	0.000543513	0.0020488	10.95	11.18	7.73	5.28
RER1	0.86	0.73	0.00190095	0.00623307	58.72	78.88	18.64	23.33
COMMD6	0.86	0.73	0.000853136	0.00305824	123.47	147.38	29.55	39.17
PLEKHG2	0.88	0.73	1.25029e-07	1.0928e-06	3.4	5.64	1.36	3.33
RNF166	0.85	0.73	0.00163713	0.00545333	100.15	117.39	30	31.94
TRBV2	0.81	0.73	0.000756391	0.0027442	128.79	161.13	5	4.72
PHF1	1.4	0.73	1.39941e-07	1.20793e-06	56.4	63.59	8.18	12.22
RPS19	0.78	0.73	8.88678e-07	6.58594e-06	980.06	1236.51	86.82	94.72
RPL24	0.85	0.73	0.00071495	0.00260748	232.87	224.06	39.55	44.72
APOBEC3B	0.34	0.73	0.0173455	0.0409373	0.2	5.16	1.36	2.78
TMEM107	1.32	0.73	4.79205e-09	5.60367e-08	18.07	32.19	5.91	5.56
SRSF2	0.81	0.73	0.00182548	0.00602296	260.05	320.29	44.55	46.11
TIMM17A	1.03	0.73	1.54919e-05	8.66565e-05	46.09	49.84	9.09	8.06
RPS15A	0.81	0.73	4.02493e-05	0.000203148	25.36	24.24	55.45	53.89
PISD	0.9	0.73	0.00126852	0.00436149	35.75	54.68	7.73	8.33
IFI27L2	0.85	0.73	0.00157565	0.00527541	142.68	180.42	17.27	24.17
FAM50B	-0.34	0.73	0.0195024	0.0452308	16.72	12.3	1.36	1.11
TMX4	0.95	0.73	0.000763777	0.00276829	50.7	67.84	16.82	16.94
ZC3H11A	1.3	0.73	1.33847e-07	1.15984e-06	12.3	20.76	8.64	10.83
SCYL1	0.9	0.73	0.000747626	0.00271684	53.16	42	10	8.61
CLIC3	0.9	0.73	0.00075067	0.00272612	189.53	313.28	13.18	16.67
PPP1R15A	0.86	0.73	0.00276297	0.00856413	259.08	363.93	27.27	32.22
FICD	-0.5	0.73	0.000491547	0.00188426	9.74	6.63	2.27	1.67
COX16	0.88	0.73	0.000140833	0.000620102	37.33	52.53	13.64	18.61
AP2S1	0.86	0.72	0.00126822	0.00436149	78.14	91.07	11.82	12.5
HIP1	-0.59	0.72	0.000698	0.00255995	8.84	15.22	7.27	5.28
SLC9A8	0.45	0.72	0.0181976	0.0426311	9.44	9.62	5.91	5.56
TAP2.1	1.21	0.72	4.30854e-10	6.03576e-09	15.14	20.13	5.45	6.39
NME1	1.43	0.72	3.43165e-11	5.85594e-10	13.9	15.89	5	6.11
MTFR1L	0.98	0.72	1.56218e-05	8.7295e-05	23.44	23.95	6.36	7.22
RPS29	0.77	0.72	6.13385e-06	3.77721e-05	452.19	472.51	84.09	87.78
TMEM50B	0.86	0.72	0.00273541	0.00850479	69.02	98.49	13.64	18.89
APOL6	0.95	0.72	0.000589908	0.0021962	32.82	31.27	20.45	18.06
AAGAB	0.58	0.72	0.0184698	0.0431669	62.47	44.68	11.82	8.33
SEC62	0.83	0.72	0.00179084	0.00591921	38.62	48.83	28.18	27.5
ACTR6	0.84	0.72	0.000773973	0.00280341	29.19	40.45	5.45	7.5
ATP2B1	0.62	0.72	0.0122764	0.0305233	19.12	21.35	9.55	10.28
SNX14	0.75	0.72	0.00275499	0.00854894	21.11	31.54	8.64	13.61
MOCS3	0.33	0.72	0.0218927	0.049868	0	3	0	1.11
KPNA5	-0.86	0.72	9.34417e-06	5.50385e-05	12.81	10.86	8.18	6.67
ALDOC	1.05	0.72	6.45089e-08	6.0221e-07	15.88	39.8	3.18	4.72
LRRC40	0.5	0.72	0.00365534	0.0109335	8.92	14.32	3.64	3.89
MESDC2	0.75	0.72	0.00582045	0.0161487	35.14	39.66	9.55	11.39
SNRK	0.85	0.72	0.00034368	0.0013655	20.78	22.24	4.09	6.94
SGSH	0.88	0.72	0.00206924	0.00668815	36.09	48.31	6.36	10
TRAV30	0.36	0.72	0.0192423	0.044767	48.8	144.76	0.91	1.94
SNRPD2	0.84	0.72	0.00183935	0.00606151	388.49	591.78	37.27	41.67
MTERF	1.02	0.72	1.34437e-08	1.42099e-07	8.74	16.94	2.73	3.06
BLVRA	1.63	0.72	1.23718e-12	2.64813e-11	54.54	79.98	4.55	6.39
HSPE1	0.8	0.72	0.00061325	0.00227541	51.73	57.22	21.36	21.39
RPL3	0.84	0.72	0.000991522	0.00350344	525.41	623.84	60.91	59.44
FAM98C	0.72	0.72	0.00452035	0.0130806	15.49	25.89	4.09	7.5
DBNL	0.84	0.72	0.00406276	0.0119876	39.49	54.13	14.09	22.5
DOHH	0.44	0.71	0.00586826	0.0162529	9.82	10.88	1.82	2.22
GHITM	0.88	0.71	0.00318569	0.0096879	317.15	382.04	20.91	21.39
CYP20A1	-0.8	0.71	0.00132974	0.00453966	73	64.16	12.73	10.83
GZMA	0.82	0.71	0.00037195	0.00146576	4565.6	6379.41	65.91	75
HSPA4	0.79	0.71	0.00299872	0.00919989	37.07	41.23	8.64	13.61
SUPT6H	0.82	0.71	0.00290444	0.00895514	17.99	21.94	7.73	11.94
ZNF75D	1.16	0.71	6.5513e-12	1.25264e-10	6.53	16.45	1.36	3.06
PXN	0.84	0.71	0.000669101	0.00246294	13.67	21.75	9.09	12.5
ALDOA	0.82	0.71	0.00157612	0.00527541	287.99	379.7	48.18	58.33
ACTR1A	0.76	0.71	0.00709732	0.0191509	58.01	72.89	8.64	13.89
NDUFS5	0.87	0.71	0.00150152	0.00505773	800.18	933.21	23.18	28.89
CCDC47	0.96	0.71	0.000687237	0.00252214	45.43	61.03	9.55	9.44
MRC2	0.34	0.71	0.0215319	0.0491975	0.45	2.83	0.45	1.39
RPL23A	0.75	0.71	4.24524e-06	2.70105e-05	220.32	241.06	87.73	85.56
LYRM9	0.86	0.71	1.2228e-06	8.78092e-06	5.78	5.66	2.27	3.33
ENSA	0.82	0.71	0.00200959	0.00653146	51.97	62.71	23.64	25
CCT8	0.93	0.71	0.0015728	0.00526747	122.05	133.84	10.91	16.11
PSMA7	0.8	0.71	0.000284134	0.00115325	1032.84	1201.28	66.36	71.39
SEP15	0.84	0.71	0.00308469	0.00942979	121.72	178.88	11.36	14.17
C20orf196	-0.53	0.71	0.00461509	0.0133166	22.78	43.91	3.64	3.61
MLF2	0.84	0.71	0.00337322	0.0101774	119.33	145.21	17.27	22.78
CDK4	0.94	0.71	0.000118512	0.000530013	29.62	26.69	6.82	5.28
CCL3L1	0.71	0.71	0.000821283	0.00295934	23.52	50.43	3.64	7.5
LAMP1	0.8	0.71	0.000570059	0.00213513	8.68	11.52	13.64	14.72
TBC1D7	0.99	0.71	9.1341e-06	5.40313e-05	14.6	18.25	5.45	6.11
LY6E	0.8	0.71	0.000680032	0.00249817	490.79	749.7	55	65
DYNC1LI1	0.66	0.71	0.00254064	0.00799545	15.62	21.82	5.45	8.61
GALNT11	2.56	0.71	7.64622e-24	8.41009e-22	17.39	19.34	8.64	7.22
UBXN2A	1.11	0.71	5.39662e-07	4.15749e-06	13.64	14.08	9.55	6.39
KCTD10	0.55	0.71	0.0031344	0.00955545	6.92	12.31	2.27	3.89
PRIMPOL	0.66	0.71	0.000173153	0.000743939	13.35	17.91	3.64	4.17
[truncated: 1,689 more rows]

## Sheet: TCR
MiXCR analysis. TCR
	Metadata				MiXCR								Analysis
Cell name	Cluster	Treatment	Cell type	Treatment Cell type	TRA clone Count	TRA clone fraction	TRB clone Count	TRB clone fraction	TRA clonal sequence	TRA aaSeqCDR3	TRB clonal sequence	TRB aaSeqCDR3	Name TRA	Name TRB	Name TRA and TRB	Freq TRA	Freq TRB	Freq TRA and TRB	Clonal expansion level (0, 1, >=2)
001_A1_16_032_POST_CD3POS_A	2	POST	CD8	POST_CD8	72	1	211	1	TGTGCAATGATCTATTCAGGAAACACACCTCTTGTCTTT	CAMIYSGNTPLVF	TGTGCCAGCAGCCAGACAGGGGGCGAGTACGAGCAGTACTTC	CASSQTGGEYEQYF	ALPHA_74	BETA_247	ALPHA_74-BETA_247	3	3	3	2
001_A1_16_032_PRE_CD3POS_B	0	PRE	CD4	PRE_CD4	44	1	31	1	TGTGCTACCGCCGGGGAGAATTTGGCCAGACTCATGTTT	CATAGENLARLMF	TGCGCCAGCAGCCAAGGAGAGGGCGGGGGTGAAAAACTGTTTTTT	CASSQGEGGGEKLFF	ALPHA_298	BETA_108	ALPHA_298-BETA_108	1	1	1	1
002_B1_16_032_POST_CD3POS_B	2	POST	CD8	POST_CD8			319	1			TGTGCCAGCAGTCCAGAAGCGGCAGGGCTTATGGGGGAAAAACTGTTTTTT	CASSPEAAGLMGEKLFF		BETA_477	NA-BETA_477		3		0
002_B1_16_032_PRE_CD3POS_A	1	PRE	CD8	PRE_CD8			44	1			TGTGCCAGCAGCGTAGTTCACTATGGCTACACCTTC	CASSVVHYGYTF		BETA_339	NA-BETA_339		1		0
003_C1_16_032_POST_CD3POS_A	1	POST	CD8	POST_CD8			156	1			TGCAGTGCTACCCCCCTCCTACTAGCGGGAGGCAGGGTGGAGACCCAGTACTTC	CSATPLLLAGGRVETQYF		BETA_25	NA-BETA_25		4		0
003_C1_16_032_PRE_CD3POS_A	0	PRE	CD4	PRE_CD4	27	1	36	1	TGTGCTGTGCAGGTGGTATCGGGTAGCAACTATAAACTGACATTT	CAVQVVSGSNYKLTF	TGTGCCAGCAGCTTAGGCTCCGAAGTGACCCAGTACTTC	CASSLGSEVTQYF	ALPHA_496	BETA_398	ALPHA_496-BETA_398	1	1	1	1
003_C1_16_032_PRE_CD3POS_B	0	PRE	CD4	PRE_CD4	250	1			TGTGCCTTTAGTGGAGGTAGCAACTATAAACTGACATTT	CAFSGGSNYKLTF			ALPHA_286		ALPHA_286-NA	1			0
004_D1_16_032_POST_CD3POS_A	2	POST	CD8	POST_CD8	88	1			TGTGCTCTTGGGGATAAGTTCCTACGGTGGGGGTGGAGAGTGACAGCACAACTCTTCTTT	CALGDKFLRWGWRVTAQLFF			ALPHA_391		ALPHA_391-NA	1			0
004_D1_16_032_POST_CD3POS_B	0	POST	CD4	POST_CD4	19	1	345	0.73	TGTGTGGTGAGCGCGAGGGATGGGGCAAACAACCTCTTCTTT	CVVSARDGANNLFF	TGTGCCAGCAGCGCCCGAAACAGGGAGGAAGCTTTCTTT	CASSARNREEAFF	ALPHA_620	BETA_322	ALPHA_620-BETA_322	1	1	1	1
005_E1_16_032_POST_CD3POS_A	2	POST	CD8	POST_CD8	8	1	163	0.91	TGTGCTGTCAGATTAACGAAAGATGGAGGAAGCCAAGGAAATCTCATCTTT	CAVRLTKDGGSQGNLIF	TGTGCCATCCCGGGACTAGGAAAGGGTGAGCAGTTCTTC	CAIPGLGKGEQFF	ALPHA_428	BETA_691	ALPHA_428-BETA_691	1	1	1	1
005_E1_16_032_POST_CD3POS_B	0	POST	CD4	POST_CD4	159	1	14	1	TGTGCTGTGAGTGGTCGGCGAGGAACCTACAAATACATCTTT	CAVSGRRGTYKYIF	TGTGCCAGCACCGTACAGGGCTACGAGCAGTACTTC	CASTVQGYEQYF	ALPHA_485	BETA_194	ALPHA_485-BETA_194	1	1	1	1
005_E1_16_032_PRE_CD3POS_A	0	PRE	CD4	PRE_CD4			60	1			TGTGCCAGCAAGGGGTCACAGGCCGGGGAGCTGTTTTTT	CASKGSQAGELFF		BETA_187	NA-BETA_187		1		0
006_F1_16_032_POST_CD3POS_B	0	POST	CD4	POST_CD4			376	1			TGTGCCAGCACTCCCTGGGGAGCTGAAGCTTTCTTT	CASTPWGAEAFF		BETA_197	NA-BETA_197		1		0
006_F1_16_032_PRE_CD3POS_A	0	PRE	CD4	PRE_CD4			78	1			TGTGCCAGCAGCCCCGAGGGAGCTGAGCAGTTCTTC	CASSPEGAEQFF		BETA_271	NA-BETA_271		1		0
007_G1_16_032_POST_CD3POS_A	2	POST	CD8	POST_CD8	127	1			TGTGCCTGTGACACCGTGGCTGGGGGATACGGGTCCACCGATAAACTCATCTTT	CACDTVAGGYGSTDKLIF			ALPHA_274		ALPHA_274-NA	9			0
007_G1_16_032_PRE_CD3POS_A	2	PRE	CD8	PRE_CD8	60	1			TGTGCTCTTGGGGAACCTTCTGACAAGTACTGGGGGAAAAGGCGTGGTACCGATAAACTCATCTTT	CALGEPSDKYWGKRRGTDKLIF			ALPHA_383		ALPHA_383-NA	4			0
008_H1_16_032_PRE_CD3POS_A	0	PRE	CD4	PRE_CD4	140	1	115	1	TGCATCCTGAGCGCCCATTCAGGAGGAGGTGCTGACGGACTCACCTTT	CILSAHSGGGADGLTF	TGTGCCAGCAGCTTAGTGCTAGCGGGGGAAGAGACCCAGTACTTC	CASSLVLAGEETQYF	ALPHA_8	BETA_404	ALPHA_8-BETA_404	1	1	1	1
009_A2_16_032_PRE_CD3POS_A	0	PRE	CD4	PRE_CD4	38	1			TGTGCTGTGGGGTCAGGAGGAAGCTACATACCTACATTT	CAVGSGGSYIPTF			ALPHA_522		ALPHA_522-NA	1			0
009_A2_16_032_PRE_CD3POS_B	0	PRE	CD4	PRE_CD4	210	0.96	186	1	TGTGCCGTGTTTTCTGGTGGCTACAATAAGCTGATTTTT	CAVFSGGYNKLIF	TGCAGTGCCAACGAGCGGGACAGTCTCTATGGCTACACCTTC	CSANERDSLYGYTF	ALPHA_259	BETA_14	ALPHA_259-BETA_14	1	1	1	1
010_B2_16_032_PRE_CD3POS_B	0	PRE	CD4	PRE_CD4			47	1			TGCGCCAGCAGCCTAGAGGGACTAGCGGCTAGCACAGATACGCAGTATTTT	CASSLEGLAASTDTQYF		BETA_126	NA-BETA_126		1		0
011_C2_16_032_POST_CD3POS_B	2	POST	CD8	POST_CD8	118	1			TGTGCGGGAGGTGGTACTAGCTATGGAAAGCTGACATTT	CAGGGTSYGKLTF			ALPHA_296		ALPHA_296-NA	1			0
011_C2_16_032_PRE_CD3POS_B	0	PRE	CD4	PRE_CD4	456	1			TGTGCAGCAAGAAGGCTGAACCAGGCAGGAACTGCTCTGATCTTT	CAARRLNQAGTALIF			ALPHA_120		ALPHA_120-NA	1			0
012_D2_16_032_PRE_CD3POS_A	0	PRE	CD4	PRE_CD4	40	1	113	1	TGTGCAGCAAGTAAGAACAAATTTTACTTT	CAASKNKFYF	TGCAGTGCTCCGGGACTAGCCTACACCGGGGAGCTGTTTTTT	CSAPGLAYTGELFF	ALPHA_147	BETA_64	ALPHA_147-BETA_64	1	1	1	1
013_E2_16_032_POST_CD3POS_A	2	POST	CD8	POST_CD8			17	1			TGTGCCAGCAGTCCAGAAGCGGCAGGGCTTATGGGGGAAAAACTGTTTTTT	CASSPEAAGLMGEKLFF		BETA_477	NA-BETA_477		3		0
013_E2_16_032_POST_CD3POS_B	1	POST	CD8	POST_CD8	41	0.91			TGTGCAGTCCCCTTTTATGGAGGAAGCCAAGGAAATCTCATCTTT	CAVPFYGGSQGNLIF			ALPHA_204		ALPHA_204-NA	1			0
013_E2_16_032_PRE_CD3POS_B	1	PRE	CD8	PRE_CD8			300	0.95			TGTGCCAGCAGACCCATGGCGGGAGGGCCTGGGGAGCAGTACTTC	CASRPMAGGPGEQYF		BETA_207	NA-BETA_207		5		0
014_F2_16_032_POST_CD3POS_B	2	POST	CD8	POST_CD8			188	1			TGTGCCAGCAGCCCGGACAGAAACATTCAGTACTTC	CASSPDRNIQYF		BETA_281	NA-BETA_281		1		0
014_F2_16_032_PRE_CD3POS_A	0	PRE	CD4	PRE_CD4	76	1			TGTGTGGTGAACAAAGAAGCCAGACTCATGTTT	CVVNKEARLMF			ALPHA_596		ALPHA_596-NA	1			0
015_G2_16_032_POST_CD3POS_B	1	POST	CD8	POST_CD8	30	1	169	1	TGTGCTGCCCCGAACTCAAATTCCGGGTATGCACTCAACTTC	CAAPNSNSGYALNF	TGTGCCAGCTCACCCTTACCGACAGAAAGCTACGAGCAGTACTTC	CASSPLPTESYEQYF	ALPHA_401	BETA_633	ALPHA_401-BETA_633	6	7	6	2
015_G2_16_032_PRE_CD3POS_A	0	PRE	CD4	PRE_CD4	22	1	156	1	TGTGCTGTCTCTTTATCTAACTTTGGAAATGAGAAATTAACCTTT	CAVSLSNFGNEKLTF	TGTGCCAGCAGCGAAAGAACTAGCTGGGATGAGCAGTTCTTC	CASSERTSWDEQFF	ALPHA_434	BETA_313	ALPHA_434-BETA_313	1	1	1	1
016_H2_16_032_POST_CD3POS_A	2	POST	CD8	POST_CD8	10	1			TGTGCTCTTGGGGAACCTTCTGACAAGTACTGGGGGAAAAGGCGTGGTACCGATAAACTCATCTTT	CALGEPSDKYWGKRRGTDKLIF			ALPHA_383		ALPHA_383-NA	4			0
016_H2_16_032_PRE_CD3POS_A	1	PRE	CD8	PRE_CD8	81	1			TGTGCTCTGAGTGACCTCCCCATCATAATTCAGGGAGCCCAGAAGCTGGTATTT	CALSDLPIIIQGAQKLVF			ALPHA_347		ALPHA_347-NA	1			0
017_A3_16_032_POST_CD3POS_A	2	POST	CD8	POST_CD8	1	1	50	1	TGTGCCTGTGACACCGTGGCTGGGGGATACGGGTCCACCGATAAACTCATCTTT	CACDTVAGGYGSTDKLIF	TGTGCCAGCAGCGGAGACAGGCGGGAGCAGTACTTC	CASSGDRREQYF	ALPHA_274	BETA_327	ALPHA_274-BETA_327	9	1	1	1
017_A3_16_032_POST_CD3POS_B	2	POST	CD8	POST_CD8	77	1			TGTGCCTGTGACACCCTCCTCCTTAGTACTGGGGGATACACCGATAAACTCATCTTT	CACDTLLLSTGGYTDKLIF			ALPHA_269		ALPHA_269-NA	1			0
017_A3_16_032_PRE_CD3POS_A	0	PRE	CD4	PRE_CD4	13	0.81	94	1	TGCGCTGTGAGAGATCAGAAGGCAGGAACTGCTCTGATCTTT	CAVRDQKAGTALIF	TGTGCCAGCAGCTTTGGGACGGCAACTAATGAAAAACTGTTTTTT	CASSFGTATNEKLFF	ALPHA_41	BETA_453	ALPHA_41-BETA_453	1	1	1	1
017_A3_16_032_PRE_CD3POS_B	1	PRE	CD8	PRE_CD8			146	1			TGTGCCAGCAGCCGGGGGCAGGGCCCCACAGATACGCAGTATTTT	CASSRGQGPTDTQYF		BETA_298	NA-BETA_298		1		0
018_B3_16_032_PRE_CD3POS_B	0	PRE	CD4	PRE_CD4	229	1			TGTGTGGTGAGCACTATTTCAGGAGGAAGCTACATACCTACATTT	CVVSTISGGSYIPTF			ALPHA_616		ALPHA_616-NA	1			0
019_C3_16_032_POST_CD3POS_B	2	POST	CD8	POST_CD8	99	1	127	0.95	TGTGCTGCCCCGAACTCAAATTCCGGGTATGCACTCAACTTC	CAAPNSNSGYALNF	TGTGCCAGCTCACCCTTACCGACAGAAAGCTACGAGCAGTACTTC	CASSPLPTESYEQYF	ALPHA_401	BETA_633	ALPHA_401-BETA_633	6	7	6	2
019_C3_16_032_PRE_CD3POS_B	0	PRE	CD4	PRE_CD4	1625	1	346	1	TGTGCTTATAGGCCGATGGATAGCAGCTATAAATTGATCTTC	CAYRPMDSSYKLIF	TGTGCCAGCAGACCCGGAGGTAGCGGGGGGTTCCAAAACATTCAGTACTTC	CASRPGGSGGFQNIQYF	ALPHA_560	BETA_208	ALPHA_560-BETA_208	1	1	1	1
020_D3_16_032_PRE_CD3POS_B	2	PRE	CD8	PRE_CD8	108	1	502	1	TGTGCAATGATCTATTCAGGAAACACACCTCTTGTCTTT	CAMIYSGNTPLVF	TGTGCCAGCAGCCAGACAGGGGGCGAGTACGAGCAGTACTTC	CASSQTGGEYEQYF	ALPHA_74	BETA_247	ALPHA_74-BETA_247	3	3	3	2
021_E3_16_032_PRE_CD3POS_A	0	PRE	CD4	PRE_CD4	78	1	16	1	TGTGCCGTGTTTCAGGGAGCCCAGAAGCTGGTATTT	CAVFQGAQKLVF	TGTGCCAGCAGCCAAACACGGGCCGGGGAGCTGTTTTTT	CASSQTRAGELFF	ALPHA_258	BETA_221	ALPHA_258-BETA_221	1	1	1	1
021_E3_16_032_PRE_CD3POS_B	0	PRE	CD4	PRE_CD4	296	1	920	0.99	TGTGCAGCAAGCGCCCTAAGTGGAGGCCAGAAGCTGGTATTT	CAASALSGGQKLVF	TGTGCCAGCAGCTTAGCCGGGGGCAATCAGCCCCAGCATTTT	CASSLAGGNQPQHF	ALPHA_133	BETA_387	ALPHA_133-BETA_387	1	1	1	1
022_F3_16_032_POST_CD3POS_B	0	POST	CD4	POST_CD4	327	1	313	1	TGTGCAATGAGCGTTAACACGGGCAGGAGAGCACTTACTTTT	CAMSVNTGRRALTF	TGTGCCAGCAGCTCCGCGTCGCGCCCGGGCACCGGGGAGCTGTTTTTT	CASSSASRPGTGELFF	ALPHA_71	BETA_354	ALPHA_71-BETA_354	1	1	1	1
022_F3_16_032_PRE_CD3POS_A	1	PRE	CD8	PRE_CD8	66	0.63	46	1	TGTGCTCCGGGGTCAGGAACCTACAAATACATCTTT	CAPGSGTYKYIF	TGCGCCAGCAGCCAAGACTGGGGGGGCGCGGGCTATGGCTACACCTTC	CASSQDWGGAGYGYTF	ALPHA_318	BETA_96	ALPHA_318-BETA_96	1	1	1	1
023_G3_16_032_POST_CD3POS_A	2	POST	CD8	POST_CD8			59	1			TGCGCCAGCAGCCAAGATAAGCCTGGAGAGGGGCTCTTCTCTGGGGCCAACGTCCTGACTTTC	CASSQDKPGEGLFSGANVLTF		BETA_98	NA-BETA_98		6		0
024_H3_16_032_PRE_CD3POS_A	0	PRE	CD4	PRE_CD4	28	1	54	0.68	TGTGCAGGCTCAGATGGCCAGAAGCTGCTCTTT	CAGSDGQKLLF	TGCGCCAGCAGCCGCGATCTAGCGGGAGGGCACCGGGAGACCCAGTACTTC	CASSRDLAGGHRETQYF	ALPHA_191	BETA_123	ALPHA_191-BETA_123	1	1	1	1
025_A4_16_032_POST_CD3POS_A	2	POST	CD8	POST_CD8	241	1			TGTGCCTGTGACACCGTGGCTGGGGGATACGGGTCCACCGATAAACTCATCTTT	CACDTVAGGYGSTDKLIF			ALPHA_274		ALPHA_274-NA	9			0
025_A4_16_032_PRE_CD3POS_B	0	PRE	CD4	PRE_CD4	660	1	719	1	TGTGCTGTAAGCCCTTCTGGTTCTGCAAGGCAACTGACCTTT	CAVSPSGSARQLTF	TGTGCCAGCAGTTTAATTAGAGAGACCCAGTACTTC	CASSLIRETQYF	ALPHA_426	BETA_581	ALPHA_426-BETA_581	1	1	1	1
026_B4_16_032_POST_CD3POS_A	0	POST	CD4	POST_CD4			48	1			TGTGCCAGCCTGGGGGACAGCGGAATCTCTGGGGCCAACGTCCTGACTTTC	CASLGDSGISGANVLTF		BETA_615	NA-BETA_615		1		0
027_C4_16_032_POST_CD3POS_A	1	POST	CD8	POST_CD8	127	1			TGTGCCGTGGTCCTCAATGACATGCGCTTT	CAVVLNDMRF			ALPHA_256		ALPHA_256-NA	1			0
027_C4_16_032_POST_CD3POS_B	0	POST	CD4	POST_CD4	455	1	497	1	TGTGCAGTTCCTCCTAACGACTACAAGCTCAGCTTT	CAVPPNDYKLSF	TGTGCCAGCGGTTTGGCGGGAGGGGTCAATGAGCAGTTCTTC	CASGLAGGVNEQFF	ALPHA_207	BETA_623	ALPHA_207-BETA_623	1	1	1	1
027_C4_16_032_PRE_CD3POS_A	2	PRE	CD8	PRE_CD8	314	1			TGTGCAGCAAGGGGATCAGGAGGAAGCTACATACCTACATTT	CAARGSGGSYIPTF			ALPHA_145		ALPHA_145-NA	1			0
027_C4_16_032_PRE_CD3POS_B	0	PRE	CD4	PRE_CD4	175	1	139	1	TGTGCTTTCATGAAGCATTCAGGAGGAGGTGCTGACGGACTCACCTTT	CAFMKHSGGGADGLTF	TGTGCCAGCAGTTTAGCAGGAGTGAACACTGAAGCTTTCTTT	CASSLAGVNTEAFF	ALPHA_572	BETA_586	ALPHA_572-BETA_586	1	1	1	1
028_D4_16_032_POST_CD3POS_B	0	POST	CD4	POST_CD4	27	0.93			TGTGCCCTTACGGGAGGAGGAAACAAACTCACCTTT	CALTGGGNKLTF			ALPHA_217		ALPHA_217-NA	1			0
028_D4_16_032_PRE_CD3POS_A	0	PRE	CD4	PRE_CD4			96	1			TGCAGTGCCTTCGGGCAGCTCGCGCCAACCTACGAGCAGTACTTC	CSAFGQLAPTYEQYF		BETA_20	NA-BETA_20		1		0
029_E4_16_032_POST_CD3POS_A	2	POST	CD8	POST_CD8	53	1	64	1	TGTGCAATGAGAGAGGGCGAATCCGGTAACCAGTTCTATTTT	CAMREGESGNQFYF	TGTGCCAGCAGCCTACAGGGTGCCCCGAACACTGAAGCTTTCTTT	CASSLQGAPNTEAFF	ALPHA_61	BETA_304	ALPHA_61-BETA_304	1	1	1	1
029_E4_16_032_POST_CD3POS_B	2	POST	CD8	POST_CD8			176	1			TGCGCCAGCAGCCAAGTCGGGGGTACTGAAGCTTTCTTT	CASSQVGGTEAFF		BETA_109	NA-BETA_109		3		0
029_E4_16_032_PRE_CD3POS_A	0	PRE	CD4	PRE_CD4	37	1	130	1	TGTGCTTCTCTCTCTAGCAACACAGGCAAACTAATCTTT	CASLSSNTGKLIF	TGTGCCAGTAGTTACCGGGTCCCCTCCTACGAGCAGTACTTC	CASSYRVPSYEQYF	ALPHA_567	BETA_675	ALPHA_567-BETA_675	1	1	1	1
029_E4_16_032_PRE_CD3POS_B	0	PRE	CD4	PRE_CD4	282	1	149	1	TGTGCAATGAGAGATAAAGATGACAAGATCATCTTT	CAMRDKDDKIIF	TGTGCCAGCAGTCGCCCGGCGGGGGTGAACACTGAAGCTTTCTTT	CASSRPAGVNTEAFF	ALPHA_67	BETA_494	ALPHA_67-BETA_494	1	1	1	1
030_F4_16_032_POST_CD3POS_A	0	POST	CD4	POST_CD4	40	1	127	1	TGTGCAGCAAAGGGAGGAAAGCTTATCTTC	CAAKGGKLIF	TGTGCCAGCAGTCCCCCCTCCTGGACTAGCGAAAGGTACGAGCAGTACTTC	CASSPPSWTSERYEQYF	ALPHA_113	BETA_482	ALPHA_113-BETA_482	1	1	1	1
030_F4_16_032_POST_CD3POS_B	2	POST	CD8	POST_CD8			111	1			TGCGCCAGCAGCCAAGATAAGCCTGGAGAGGGGCTCTTCTCTGGGGCCAACGTCCTGACTTTC	CASSQDKPGEGLFSGANVLTF		BETA_98	NA-BETA_98		6		0
031_G4_16_032_POST_CD3POS_A	2	POST	CD8	POST_CD8	82	1	9	1	TGTGCTGCCCCGAACTCAAATTCCGGGTATGCACTCAACTTC	CAAPNSNSGYALNF	TGTGCCAGCTCACCCTTACCGACAGAAAGCTACGAGCAGTACTTC	CASSPLPTESYEQYF	ALPHA_401	BETA_633	ALPHA_401-BETA_633	6	7	6	2
031_G4_16_032_POST_CD3POS_B	1	POST	CD8	POST_CD8	309	0.51	126	1	TGTGTGGTGAACGAGCCCGCAGGCTTTCAGAAACTTGTATTT	CVVNEPAGFQKLVF	TGTGCCAGCAGCTCACCGGAGATGAGCTCAGATACGCAGTATTTT	CASSSPEMSSDTQYF	ALPHA_604	BETA_344	ALPHA_604-BETA_344	1	1	1	1
031_G4_16_032_PRE_CD3POS_A	0	PRE	CD4	PRE_CD4	42	1	15	1	TGTGCCGCGACGTTTTGGGAAACCAGTGGCTCTAGGTTGACCTTT	CAATFWETSGSRLTF	TGTGCCAGCAGCTTATTAGCGGGAGGTACTAGCACAGATACGCAGTATTTT	CASSLLAGGTSTDTQYF	ALPHA_223	BETA_411	ALPHA_223-BETA_411	1	1	1	1
032_H4_16_032_PRE_CD3POS_A	1	PRE	CD8	PRE_CD8	16	1	91	1	TGTGCAGAGTCCAATGCAGGCAAATCAACCTTT	CAESNAGKSTF	TGTGCCAGCAGTTACGGTGGGACAGGGGCTATAGGCTACACCTTC	CASSYGGTGAIGYTF	ALPHA_110	BETA_549	ALPHA_110-BETA_549	1	1	1	1
033_A5_16_032_POST_CD3POS_A	0	POST	CD4	POST_CD4	7	1	25	1	TGTGCTCTAAGTGGCTCTAGCAACACAGGCAAACTAATCTTT	CALSGSSNTGKLIF	TGTGCCAGCAGCCAACACCGTACTGTGAGGGGGAACACCGGGGAGCTGTTTTTT	CASSQHRTVRGNTGELFF	ALPHA_323	BETA_223	ALPHA_323-BETA_223	1	1	1	1
033_A5_16_032_POST_CD3POS_B	2	POST	CD8	POST_CD8	59	1			TGTGCAATGAGGGCTAATAACAATGACATGCGCTTT	CAMRANNNDMRF			ALPHA_72		ALPHA_72-NA	8			0
034_B5_16_032_POST_CD3POS_B	0	POST	CD4	POST_CD4	33	1	176	1	TGTGCCGTGAGACGAAAAGCTGCAGGCAACAAGCTAACTTTT	CAVRRKAAGNKLTF	TGCAGTGCTGAGGGAGTGGGGGAGCAGTACTTC	CSAEGVGEQYF	ALPHA_242	BETA_71	ALPHA_242-BETA_71	1	1	1	1
034_B5_16_032_PRE_CD3POS_B	2	PRE	CD8	PRE_CD8	273	1	1448	1	TGTGCAATGATCTATTCAGGAAACACACCTCTTGTCTTT	CAMIYSGNTPLVF	TGTGCCAGCAGCCAGACAGGGGGCGAGTACGAGCAGTACTTC	CASSQTGGEYEQYF	ALPHA_74	BETA_247	ALPHA_74-BETA_247	3	3	3	2
035_C5_16_032_POST_CD3POS_A	2	POST	CD8	POST_CD8	65	1	138	1	TGTGCTCTGAGTGGGGGGGTTACCGGCACTGCCAGTAAACTCACCTTT	CALSGGVTGTASKLTF	TGCAGTGCTACCCCCCTCCTACTAGCGGGAGGCAGGGTGGAGACCCAGTACTTC	CSATPLLLAGGRVETQYF	ALPHA_364	BETA_25	ALPHA_364-BETA_25	4	4	3	2
036_D5_16_032_POST_CD3POS_B	2	POST	CD8	POST_CD8	19	1			TGTGCTCTTGGGGAACCTTCTGACAAGTACTGGGGGAAAAGGCGTGGTACCGATAAACTCATCTTT	CALGEPSDKYWGKRRGTDKLIF			ALPHA_383		ALPHA_383-NA	4			0
036_D5_16_032_PRE_CD3POS_B	0	PRE	CD4	PRE_CD4	80	1	66	1	TGTGCTGTGGGTCTTTCAGGATACAGCACCCTCACCTTT	CAVGLSGYSTLTF	TGTGCCAGCAGCGAGGGACTAGCGTATAGCACAGATACGCAGTATTTT	CASSEGLAYSTDTQYF	ALPHA_524	BETA_318	ALPHA_524-BETA_318	1	1	1	1
037_E5_16_032_POST_CD3POS_A	2	POST	CD8	POST_CD8	53	1	77	1	TGTGCTCTGAGTGTTGGGTATGCAGGCAACATGCTCACCTTT	CALSVGYAGNMLTF	TGTGCCAGCAGGGGTCCCACTCTTGACACTGAAGCTTTCTTT	CASRGPTLDTEAFF	ALPHA_369	BETA_462	ALPHA_369-BETA_462	1	1	1	1
037_E5_16_032_POST_CD3POS_B	2	POST	CD8	POST_CD8	104	1	112	1	TGTGCAGCCGGAGGAGAGGTAGGCCAGGGAGGAAAGCTTATCTTC	CAAGGEVGQGGKLIF	TGTGCCAGCAGCTCCTTACAAGCGGGGGAGCAGTACTTC	CASSSLQAGEQYF	ALPHA_173	BETA_360	ALPHA_173-BETA_360	1	1	1	1
037_E5_16_032_PRE_CD3POS_A	0	PRE	CD4	PRE_CD4	35	1	67	1	TGCATCCTCAATAATGCAGGCAACATGCTCACCTTT	CILNNAGNMLTF	TGTGCCATCAGTGAGGGGACAGGGGTCTTCTTC	CAISEGTGVFF	ALPHA_3	BETA_686	ALPHA_3-BETA_686	1	1	1	1
038_F5_16_032_POST_CD3POS_B	2	POST	CD8	POST_CD8	216	1	212	1	TGTGCAACGTTTGGAGGCTTCAAAACTATCTTT	CATFGGFKTIF	TGTGCCAGCAGCGGCATAGCGGGAGATGAGCAGTTCTTC	CASSGIAGDEQFF	ALPHA_54	BETA_329	ALPHA_54-BETA_329	1	1	1	1
040_H5_16_032_POST_CD3POS_A	2	POST	CD8	POST_CD8	88	1	134	1	TGTGCAATGAGGGCTAATAACAATGACATGCGCTTT	CAMRANNNDMRF	TGTGCCAGCAGACCCATGGCGGGAGGGCCTGGGGAGCAGTACTTC	CASRPMAGGPGEQYF	ALPHA_72	BETA_207	ALPHA_72-BETA_207	8	5	4	2
040_H5_16_032_PRE_CD3POS_A	2	PRE	CD8	PRE_CD8	89	1	284	1	TGTGCTGTGAGGGACTTCTCGGGGTACAGCAGTGCTTCCAAGATAATCTTT	CAVRDFSGYSSASKIIF	TGCGCCAGCACCTTTGGCGGGACAGGGGCCTTGAACACTGAAGCTTTCTTT	CASTFGGTGALNTEAFF	ALPHA_467	BETA_83	ALPHA_467-BETA_83	1	1	1	1
041_A6_16_032_POST_CD3POS_A	2	POST	CD8	POST_CD8	47	0.56	45	1	TGTGCTGTGGAGGATGGGAACGACTACAAGCTCAGCTTT	CAVEDGNDYKLSF	TGCGCCAGCAGCCAAGATATCGGTCATCGGGACACCCGTCTTCTTGACAATGAGCAGTTCTTC	CASSQDIGHRDTRLLDNEQFF	ALPHA_505	BETA_99	ALPHA_505-BETA_99	3	3	3	2
041_A6_16_032_PRE_CD3POS_A	0	PRE	CD4	PRE_CD4	127	1	15	1	TGTGCTGTGAAGACCGGCACTGCCAGTAAACTCACCTTT	CAVKTGTASKLTF	TGTGCCAGTAGTATGTCCGGCGGGAGGGCTAAAGAGACCCAGTACTTC	CASSMSGGRAKETQYF	ALPHA_437	BETA_667	ALPHA_437-BETA_667	1	1	1	1
043_C6_16_032_POST_CD3POS_A	2	POST	CD8	POST_CD8	54	1			TGTGCAATGAGGGCTAATAACAATGACATGCGCTTT	CAMRANNNDMRF			ALPHA_72		ALPHA_72-NA	8			0
043_C6_16_032_PRE_CD3POS_B	0	PRE	CD4	PRE_CD4			289	0.92			TGTGCCAGCAGCCAAAGCGGGAGAGCGGGCATTCAGTACTTC	CASSQSGRAGIQYF		BETA_222	NA-BETA_222		1		0
044_D6_16_032_POST_CD3POS_A	2	POST	CD8	POST_CD8	93	1			TGTGCCTGTGACACCGTGGCTGGGGGATACGGGTCCACCGATAAACTCATCTTT	CACDTVAGGYGSTDKLIF			ALPHA_274		ALPHA_274-NA	9			0
045_E6_16_032_POST_CD3POS_A	2	POST	CD8	POST_CD8	73	1	224	1	TGTGCTCTGAGTGACTTAGGAGGAGGTGCTGACGGACTCACCTTT	CALSDLGGGADGLTF	TGTGCCAGCAGTCCAGAAGCGGCAGGGCTTATGGGGGAAAAACTGTTTTTT	CASSPEAAGLMGEKLFF	ALPHA_349	BETA_477	ALPHA_349-BETA_477	1	3	1	1
045_E6_16_032_POST_CD3POS_B	2	POST	CD8	POST_CD8	225	0.92			TGTGCCTGTGACACCGTGGCTGGGGGATACGGGTCCACCGATAAACTCATCTTT	CACDTVAGGYGSTDKLIF			ALPHA_274		ALPHA_274-NA	9			0
045_E6_16_032_PRE_CD3POS_A	0	PRE	CD4	PRE_CD4	40	1	165	1	TGTGCTTATAGGACCATTTCTTTAATTCAGGGAGCCCAGAAGCTGGTATTT	CAYRTISLIQGAQKLVF	TGTGCCAGCAGCCCCAATTTCTTAGCGGATGGGGTGGAGCAGTTCTTC	CASSPNFLADGVEQFF	ALPHA_547	BETA_262	ALPHA_547-BETA_262	1	1	1	1
046_F6_16_032_POST_CD3POS_A	2	POST	CD8	POST_CD8	72	0.95			TGTGCCTGTGACACCGTGGCTGGGGGATACGGGTCCACCGATAAACTCATCTTT	CACDTVAGGYGSTDKLIF			ALPHA_274		ALPHA_274-NA	9			0
046_F6_16_032_POST_CD3POS_B	0	POST	CD4	POST_CD4			92	1			TGTGCCAGCAGCTTGGGTGCCAGGGGTCAGCGTCAGCCCCAGCATTTT	CASSLGARGQRQPQHF		BETA_440	NA-BETA_440		1		0
047_G6_16_032_POST_CD3POS_A	2	POST	CD8	POST_CD8			201	1			TGTGCCAGCAGACACCAGGACACCGGGGAGCTGTTTTTT	CASRHQDTGELFF		BETA_206	NA-BETA_206		2		0
047_G6_16_032_PRE_CD3POS_A	0	PRE	CD4	PRE_CD4	193	0.92	18	1	TGTGTGGTGAACTTCGACTACAAGCTCAGCTTT	CVVNFDYKLSF	TGCGCCAGCAGCCAAGATTCGCGGAACTCCTACGAGCAGTACTTC	CASSQDSRNSYEQYF	ALPHA_609	BETA_103	ALPHA_609-BETA_103	1	1	1	1
049_A7_16_032_PRE_CD3POS_A	2	PRE	CD8	PRE_CD8	55	1	90	1	TGTGCTGTGCGGAGTTCAGGATACAGCACCCTCACCTTT	CAVRSSGYSTLTF	TGTGCCAGCTCGGCGGCGGACGAGCAGTACTTC	CASSAADEQYF	ALPHA_499	BETA_644	ALPHA_499-BETA_644	1	1	1	1
049_A7_16_032_PRE_CD3POS_B	0	PRE	CD4	PRE_CD4	2	1			TGTGCTCTGAGTGATCGGAACACCGGTAACCAGTTCTATTTT	CALSDRNTGNQFYF			ALPHA_359		ALPHA_359-NA	1			0
050_B7_16_032_POST_CD3POS_B	2	POST	CD8	POST_CD8	311	1	67	1	TGCATCCTGAGAGATTCTAACTTTGGAAATGAGAAATTAACCTTT	CILRDSNFGNEKLTF	TGTGCCACCACCCCGGGACGAGCCGTAGGAAAACATGGCTACACCTTC	CATTPGRAVGKHGYTF	ALPHA_7	BETA_163	ALPHA_7-BETA_163	1	1	1	1
050_B7_16_032_PRE_CD3POS_B	1	PRE	CD8	PRE_CD8	184	1	144	1	TGTGCCTTACCTTATAACCAGGGAGGAAAGCTTATCTTC	CALPYNQGGKLIF	TGTGCCAGCAGCTTTTCCCGGGCCCAAGAGACCCAGTACTTC	CASSFSRAQETQYF	ALPHA_283	BETA_454	ALPHA_283-BETA_454	1	1	1	1
051_C7_16_032_POST_CD3POS_A	2	POST	CD8	POST_CD8	335	1			TGTGCCTGTGACACCGTGGCTGGGGGATACGGGTCCACCGATAAACTCATCTTT	CACDTVAGGYGSTDKLIF			ALPHA_274		ALPHA_274-NA	9			0
051_C7_16_032_PRE_CD3POS_B	0	PRE	CD4	PRE_CD4	234	1	14	1	TGTGCTGTGAGAGCCCGCGGCTATGGTCAGAATTTTGTCTTT	CAVRARGYGQNFVF	TATGCCAGTGACAGGGGGCTGGGTAGTGAAGCTTTCTTT	YASDRGLGSEAFF	ALPHA_458	BETA_1	ALPHA_458-BETA_1	1	1	1	1
052_D7_16_032_POST_CD3POS_B	0	POST	CD4	POST_CD4			62	1			TGTGCCAGCAGGAGTAGCGGGGGGGCCCTGGATACGCAGTATTTT	CASRSSGGALDTQYF		BETA_457	NA-BETA_457		1		0
052_D7_16_032_PRE_CD3POS_A	0	PRE	CD4	PRE_CD4			98	1			TGTGCCAGCAGGTCGGGGGGGGCAGGGGACTCACCCCTCCACTTT	CASRSGGAGDSPLHF		BETA_464	NA-BETA_464		1		0
053_E7_16_032_POST_CD3POS_A	2	POST	CD8	POST_CD8	168	1	99	1	TGTGCAATGAGAGAGGAGGCATATTCCGGGTATGCACTCAACTTC	CAMREEAYSGYALNF	TGTGCCAGCAGTGATCGTCTCTCGTTTGGGAGCAATCAGCCCCAGCATTTT	CASSDRLSFGSNQPQHF	ALPHA_59	BETA_524	ALPHA_59-BETA_524	1	1	1	1
053_E7_16_032_POST_CD3POS_B	2	POST	CD8	POST_CD8	171	0.99	254	1	TGTGCTCTGAGTGGGGGGGTTACCGGCACTGCCAGTAAACTCACCTTT	CALSGGVTGTASKLTF	TGCAGTGCTACCCCCCTCCTACTAGCGGGAGGCAGGGTGGAGACCCAGTACTTC	CSATPLLLAGGRVETQYF	ALPHA_364	BETA_25	ALPHA_364-BETA_25	4	4	3	2
053_E7_16_032_PRE_CD3POS_A	0	PRE	CD4	PRE_CD4	39	1	55	1	TGTGCTGTGAGTGCTCCTTCTGGTTCTGCAAGGCAACTGACCTTT	CAVSAPSGSARQLTF	TGCGCCAGCAGCCCCGGGACAGGGGAGGCCTATGGCTACACCTTC	CASSPGTGEAYGYTF	ALPHA_482	BETA_118	ALPHA_482-BETA_118	1	1	1	1
054_F7_16_032_POST_CD3POS_A	2	POST	CD8	POST_CD8	109	1	6	1	TGTGCAATGAGGGCTAATAACAATGACATGCGCTTT	CAMRANNNDMRF	TGTGCCAGCAGACCCATGGCGGGAGGGCCTGGGGAGCAGTACTTC	CASRPMAGGPGEQYF	ALPHA_72	BETA_207	ALPHA_72-BETA_207	8	5	4	2
054_F7_16_032_PRE_CD3POS_A	0	PRE	CD4	PRE_CD4			16	1			TGCAGTGCTAGAGATTTTAATGGGGGGGGGGGAGGTGAGCAGTTCTTC	CSARDFNGGGGGEQFF		BETA_35	NA-BETA_35		1		0
055_G7_16_032_POST_CD3POS_A	2	POST	CD8	POST_CD8	98	1			TGTGCCTGTGACACCGTGGCTGGGGGATACGGGTCCACCGATAAACTCATCTTT	CACDTVAGGYGSTDKLIF			ALPHA_274		ALPHA_274-NA	9			0
056_H7_16_032_POST_CD3POS_A	0	POST	CD4	POST_CD4			51	1			TGTGCCAGCAGCTTAGCTTCGGCAGGGAACACTGAAGCTTTCTTT	CASSLASAGNTEAFF		BETA_394	NA-BETA_394		1		0
056_H7_16_032_PRE_CD3POS_A	0	PRE	CD4	PRE_CD4			166	1			TGCGCCAGCAGCCCTTCGACAGGGGCTAATGAAAAACTGTTTTTT	CASSPSTGANEKLFF		BETA_122	NA-BETA_122		1		0
057_A8_16_032_POST_CD3POS_B	0	POST	CD4	POST_CD4	45	1	87	1	TGTGCTACGGACGGCGGATCTGAAAAGCTGGTCTTT	CATDGGSEKLVF	TGTGCCAGCAGCACCGGACTTGTCTACGAGCAGTACTTC	CASSTGLVYEQYF	ALPHA_309	BETA_218	ALPHA_309-BETA_218	1	1	1	1
057_A8_16_032_PRE_CD3POS_A	0	PRE	CD4	PRE_CD4	34	1	195	1	TGTGCCTTTCCCCAGACGAACACCGGTAACCAGTTCTATTTT	CAFPQTNTGNQFYF	TGCGCCAGCAGCTCGGGACTAGCGGGAGGAACGTACGAGCAGTACTTC	CASSSGLAGGTYEQYF	ALPHA_289	BETA_131	ALPHA_289-BETA_131	1	1	1	1
058_B8_16_032_POST_CD3POS_A	2	POST	CD8	POST_CD8	109	1	90	1	TGTGCTCTTGGGGAACTAGGCTTTGGGAATGTGCTGCATTGC	CALGELGFGNVLHC	TGCGCCAGCAGCCAAGTCGGGGGTACTGAAGCTTTCTTT	CASSQVGGTEAFF	ALPHA_385	BETA_109	ALPHA_385-BETA_109	3	3	2	2
058_B8_16_032_PRE_CD3POS_B	0	PRE	CD4	PRE_CD4	109	1	159	1	TGTGCTGTGCTGGACACGGGCAGGAGAGCACTTACTTTT	CAVLDTGRRALTF	TGTGCCAGCAGCTTATCACTAGCGGGACTTACAGATACGCAGTATTTT	CASSLSLAGLTDTQYF	ALPHA_501	BETA_407	ALPHA_501-BETA_407	1	1	1	1
059_C8_16_032_POST_CD3POS_B	2	POST	CD8	POST_CD8	33	1	10	1	TGTGCTCTTGGGGAACTAGGCTTTGGGAATGTGCTGCATTGC	CALGELGFGNVLHC	TGCGCCAGCAGCCAAGTCGGGGGTACTGAAGCTTTCTTT	CASSQVGGTEAFF	ALPHA_385	BETA_109	ALPHA_385-BETA_109	3	3	2	2
059_C8_16_032_PRE_CD3POS_A	0	PRE	CD4	PRE_CD4	89	1	56	1	TGTGCAGCAAGCGCGGCCCCGGGGGACATGCGCTTT	CAASAAPGDMRF	TGTGCCAGCAGCTTGGGCATGACTAGGGGGCTTTACGAGCAGTACTTC	CASSLGMTRGLYEQYF	ALPHA_135	BETA_436	ALPHA_135-BETA_436	1	1	1	1
060_D8_16_032_POST_CD3POS_A	0	POST	CD4	POST_CD4	28	0.93	56	1	TGTGCAGGAGATATGAATTCAGGATACAGCACCCTCACCTTT	CAGDMNSGYSTLTF	TGTGCCAGCAGTTACAATAATGTAATTGAGCAGTTCTTC	CASSYNNVIEQFF	ALPHA_182	BETA_537	ALPHA_182-BETA_537	1	1	1	1
060_D8_16_032_POST_CD3POS_B	2	POST	CD8	POST_CD8			86	1			TGTGCCAGCTCACCCTTACCGACAGAAAGCTACGAGCAGTACTTC	CASSPLPTESYEQYF		BETA_633	NA-BETA_633		7		0
060_D8_16_032_PRE_CD3POS_A	1	PRE	CD8	PRE_CD8	53	1	39	1	TGTGCTCTGAGTGAGACCTTCTCTAACACCAATGCAGGCAAATCAACCTTT	CALSETFSNTNAGKSTF	TGTGCCAGTAGGCAGACAGGGTTTGGTTATAATGAGCAGTTCTTC	CASRQTGFGYNEQFF	ALPHA_350	BETA_655	ALPHA_350-BETA_655	1	1	1	1
062_F8_16_032_POST_CD3POS_B	2	POST	CD8	POST_CD8	37	1	108	1	TGTGCAATGAGGGCTAATAACAATGACATGCGCTTT	CAMRANNNDMRF	TGTGCCAGCAGACCCATGGCGGGAGGGCCTGGGGAGCAGTACTTC	CASRPMAGGPGEQYF	ALPHA_72	BETA_207	ALPHA_72-BETA_207	8	5	4	2
062_F8_16_032_PRE_CD3POS_B	0	PRE	CD4	PRE_CD4			159	1			TGTGCCAGCAGCTTGACAGGGGGGGACTATGGCTACACCTTC	CASSLTGGDYGYTF		BETA_422	NA-BETA_422		1		0
063_G8_16_032_POST_CD3POS_B	2	POST	CD8	POST_CD8	1	1			TGTGCCGAAAGAAACACAGGCAAACTAATCTTT	CAERNTGKLIF			ALPHA_218		ALPHA_218-NA	1			0
063_G8_16_032_PRE_CD3POS_A	0	PRE	CD4	PRE_CD4			28	0.93			TGCAGTGCTGGGGACAGGGGATGGGCCGGGGAGCTGTTTTTT	CSAGDRGWAGELFF		BETA_75	NA-BETA_75		1		0
064_H8_16_032_POST_CD3POS_A	2	POST	CD8	POST_CD8	23	1			TGTGCTCTTGGGGAACCTTCTGACAAGTACTGGGGGAAAAGGCGTGGTACCGATAAACTCATCTTT	CALGEPSDKYWGKRRGTDKLIF			ALPHA_383		ALPHA_383-NA	4			0
064_H8_16_032_PRE_CD3POS_A	2	PRE	CD8	PRE_CD8	37	1	80	0.99	TGTGCAGAGAATCCCCCAAACACCGGTAACCAGTTCTATTTT	CAENPPNTGNQFYF	TGCGCCAGCAGCCAAGATAAGCCTGGAGAGGGGCTCTTCTCTGGGGCCAACGTCCTGACTTTC	CASSQDKPGEGLFSGANVLTF	ALPHA_97	BETA_98	ALPHA_97-BETA_98	4	6	3	2
065_A9_16_032_POST_CD3POS_B	2	POST	CD8	POST_CD8	64	1	9	1	TGTGCAGAGAATCCCCCAAACACCGGTAACCAGTTCTATTTT	CAENPPNTGNQFYF	TGCGCCAGCAGCCAAGATAAGCCTGGAGAGGGGCTCTTCTCTGGGGCCAACGTCCTGACTTTC	CASSQDKPGEGLFSGANVLTF	ALPHA_97	BETA_98	ALPHA_97-BETA_98	4	6	3	2
067_C9_16_032_POST_CD3POS_A	2	POST	CD8	POST_CD8	134	0.74	100	0.98	TGTGCTGTGGAGGATGGGAACGACTACAAGCTCAGCTTT	CAVEDGNDYKLSF	TGCGCCAGCAGCCAAGATATCGGTCATCGGGACACCCGTCTTCTTGACAATGAGCAGTTCTTC	CASSQDIGHRDTRLLDNEQFF	ALPHA_505	BETA_99	ALPHA_505-BETA_99	3	3	3	2
068_D9_16_032_POST_CD3POS_A	2	POST	CD8	POST_CD8	68	1			TGTGCTCTTGGGGAACTAGGCTTTGGGAATGTGCTGCATTGC	CALGELGFGNVLHC			ALPHA_385		ALPHA_385-NA	3			0
068_D9_16_032_POST_CD3POS_B	0	POST	CD4	POST_CD4			102	1			TGTGCCAGCAGCCCTCTCCTGACAGGGACCGGGGAGCTGTTTTTT	CASSPLLTGTGELFF		BETA_289	NA-BETA_289		1		0
068_D9_16_032_PRE_CD3POS_A	0	PRE	CD4	PRE_CD4			135	1			TGTGCCAGCAGTTTTGGGAGCCGGGACTTCTACAATGAGCAGTTCTTC	CASSFGSRDFYNEQFF		BETA_606	NA-BETA_606		1		0
069_E9_16_032_POST_CD3POS_B	2	POST	CD8	POST_CD8	75	1	33	1	TGTGCTGCCCCGAACTCAAATTCCGGGTATGCACTCAACTTC	CAAPNSNSGYALNF	TGTGCCAGCTCACCCTTACCGACAGAAAGCTACGAGCAGTACTTC	CASSPLPTESYEQYF	ALPHA_401	BETA_633	ALPHA_401-BETA_633	6	7	6	2
069_E9_16_032_PRE_CD3POS_A	2	PRE	CD8	PRE_CD8	36	0.51	14	1	TGTGCAATGAGGGCTAATAACAATGACATGCGCTTT	CAMRANNNDMRF	TGTGCCAGCAGACCCATGGCGGGAGGGCCTGGGGAGCAGTACTTC	CASRPMAGGPGEQYF	ALPHA_72	BETA_207	ALPHA_72-BETA_207	8	5	4	2
070_F9_16_032_PRE_CD3POS_A	0	PRE	CD4	PRE_CD4	69	1			TGTGCTCTGAGTGATCCGACTGGAGGCTTCAAAACTATCTTT	CALSDPTGGFKTIF			ALPHA_358		ALPHA_358-NA	1			0
070_F9_16_032_PRE_CD3POS_B	2	PRE	CD8	PRE_CD8			239	1			TGCGCCAGCAGCCAAGATAAGCCTGGAGAGGGGCTCTTCTCTGGGGCCAACGTCCTGACTTTC	CASSQDKPGEGLFSGANVLTF		BETA_98	NA-BETA_98		6		0
071_G9_16_032_POST_CD3POS_A	1	POST	CD8	POST_CD8			60	0.95			TGTGCCAGCAGTGACGGGGGAATCGACGAGCAGTACTTC	CASSDGGIDEQYF		BETA_515	NA-BETA_515		2		0
071_G9_16_032_POST_CD3POS_B	2	POST	CD8	POST_CD8	117	1	120	1	TGTGCTTTCATGCTATATACTGGAGCCAATAGTAAGCTGACATTT	CAFMLYTGANSKLTF	TGTGCCAGCAGACACCAGGACACCGGGGAGCTGTTTTTT	CASRHQDTGELFF	ALPHA_578	BETA_206	ALPHA_578-BETA_206	1	2	1	1
071_G9_16_032_PRE_CD3POS_A	2	PRE	CD8	PRE_CD8	42	1			TGTGCCTGTGACACCGTGTCCCGCCCTTACACCGATAAACTCATCTTT	CACDTVSRPYTDKLIF			ALPHA_275		ALPHA_275-NA	1			0
072_H9_16_032_PRE_CD3POS_A	0	PRE	CD4	PRE_CD4	21	1	60	1	TGTGCTGTGACCCCGAATAACAATGCCAGACTCATGTTT	CAVTPNNNARLMF	TGCGCCAGCAGCCAAGATGGGACTGCCTTTCTAGCTTACACCTTC	CASSQDGTAFLAYTF	ALPHA_440	BETA_100	ALPHA_440-BETA_100	1	1	1	1
073_A10_16_032_POST_CD3POS_A	2	POST	CD8	POST_CD8			75	1			TGTGCCAGCAGTGAGAGCGGGGGGGATAACGAGCAGTACTTC	CASSESGGDNEQYF		BETA_516	NA-BETA_516		1		0
073_A10_16_032_POST_CD3POS_B	2	POST	CD8	POST_CD8	5	1			TGTGCAATGAGGGCTAATAACAATGACATGCGCTTT	CAMRANNNDMRF			ALPHA_72		ALPHA_72-NA	8			0
075_C10_16_032_PRE_CD3POS_B	0	PRE	CD4	PRE_CD4			78	0.95			TGTGCTAGCAGCCCACCCACGGCGGGTACGCAGTATTTT	CASSPPTAGTQYF		BETA_700	NA-BETA_700		1		0
076_D10_16_032_POST_CD3POS_A	0	POST	CD4	POST_CD4			136	0.99			TGTGCCAGCAGCTCTGGACAGCCAAGCGGGACCCAGTACTTC	CASSSGQPSGTQYF		BETA_364	NA-BETA_364		1		0
076_D10_16_032_POST_CD3POS_B	2	POST	CD8	POST_CD8	73	1	23	1	TGTGGAGCAGACGCAGAAGGAAACACACCTCTTGTCTTT	CGADAEGNTPLVF	TGTGCCAGCAGTTACCCCTCGGGGGCGGGCTATGGCTACACCTTC	CASSYPSGAGYGYTF	ALPHA_587	BETA_543	ALPHA_587-BETA_543	1	1	1	1
076_D10_16_032_PRE_CD3POS_A	0	PRE	CD4	PRE_CD4	49	0.7	53	1	TGTGCTACGGACAAAGTGGATAGCAACTATCAGTTAATCTGG	CATDKVDSNYQLIW	TGTGCCAGCAGCCGGGCGGGAAATAATTCACCCCTCCACTTT	CASSRAGNNSPLHF	ALPHA_299	BETA_297	ALPHA_299-BETA_297	1	1	1	1
076_D10_16_032_PRE_CD3POS_B	0	PRE	CD4	PRE_CD4			154	1			TGCAGTGCTAGAGCGATTCAGTCCCATACGCAGTATTTT	CSARAIQSHTQYF		BETA_36	NA-BETA_36		1		0
077_E10_16_032_PRE_CD3POS_A	1	PRE	CD8	PRE_CD8	13	1	37	1	TGTGTGGTGAACATACCCAGAGGGAACAACAGACTCGCTTTT	CVVNIPRGNNRLAF	TGTGCCAGCAGCGTGGCGGATTCCCGAGTTTACAATGAGCAGTTCTTC	CASSVADSRVYNEQFF	ALPHA_598	BETA_341	ALPHA_598-BETA_341	1	1	1	1
078_F10_16_032_POST_CD3POS_B	2	POST	CD8	POST_CD8	121	1	41	0.93	TGTGCAGAGAATCCCCCAAACACCGGTAACCAGTTCTATTTT	CAENPPNTGNQFYF	TGCGCCAGCAGCCAAGATAAGCCTGGAGAGGGGCTCTTCTCTGGGGCCAACGTCCTGACTTTC	CASSQDKPGEGLFSGANVLTF	ALPHA_97	BETA_98	ALPHA_97-BETA_98	4	6	3	2
079_G10_16_032_POST_CD3POS_A	2	POST	CD8	POST_CD8	62	1	149	0.8	TGTGCTTATAGGAGCGCCAATAACGACTACAAGCTCAGCTTT	CAYRSANNDYKLSF	TGTGCCAGCAGTAGGTGGGGGACCTACGAGCAGTACTTC	CASSRWGTYEQYF	ALPHA_552	BETA_473	ALPHA_552-BETA_473	1	1	1	1
079_G10_16_032_POST_CD3POS_B	0	POST	CD4	POST_CD4	59	1	149	1	TGTGCCGTGGACATTTCCCGGGTTAATAGGAAACTGACATTT	CAVDISRVNRKLTF	TGTGCCAGCAGCTTAGCCTGGGGACAGGGGAACTATGGCTACACCTTC	CASSLAWGQGNYGYTF	ALPHA_253	BETA_389	ALPHA_253-BETA_389	1	1	1	1
080_H10_16_032_POST_CD3POS_A	0	POST	CD4	POST_CD4	15	1			TGTGCTGGGGGGTCGTCCAATAACAATGACATGCGCTTT	CAGGSSNNNDMRF			ALPHA_421		ALPHA_421-NA	1			0
081_A11_16_032_PRE_CD3POS_A	2	PRE	CD8	PRE_CD8	24	0.96			TGTGCAATGAGGGCTAATAACAATGACATGCGCTTT	CAMRANNNDMRF			ALPHA_72		ALPHA_72-NA	8			0
082_B11_16_032_POST_CD3POS_A	2	POST	CD8	POST_CD8	97	1	71	1	TGTGCTCTGAGTGGGGGGGTTACCGGCACTGCCAGTAAACTCACCTTT	CALSGGVTGTASKLTF	TGCAGTGCTACCCCCCTCCTACTAGCGGGAGGCAGGGTGGAGACCCAGTACTTC	CSATPLLLAGGRVETQYF	ALPHA_364	BETA_25	ALPHA_364-BETA_25	4	4	3	2
083_C11_16_032_POST_CD3POS_A	0	POST	CD4	POST_CD4			3	1			TGCAGTGCTCCGGGGGGTGGGGGGGGCACCGGGGAGCTGTTTTTT	CSAPGGGGGTGELFF		BETA_65	NA-BETA_65		1		0
083_C11_16_032_PRE_CD3POS_A	0	PRE	CD4	PRE_CD4	53	1	32	1	TGTGCCGTGAATTCTGTTGGTGGTACTAGCTATGGAAAGCTGACATTT	CAVNSVGGTSYGKLTF	TGTGCCAGCAGTCCCCACGTAGCGGGTGGGAATGAGCAGTTCTTC	CASSPHVAGGNEQFF	ALPHA_239	BETA_481	ALPHA_239-BETA_481	1	1	1	1
084_D11_16_032_POST_CD3POS_A	2	POST	CD8	POST_CD8	17	0.89	161	1	TGTGCTGTGGAGGATGGGAACGACTACAAGCTCAGCTTT	CAVEDGNDYKLSF	TGCGCCAGCAGCCAAGATATCGGTCATCGGGACACCCGTCTTCTTGACAATGAGCAGTTCTTC	CASSQDIGHRDTRLLDNEQFF	ALPHA_505	BETA_99	ALPHA_505-BETA_99	3	3	3	2
084_D11_16_032_POST_CD3POS_B	1	POST	CD8	POST_CD8			122	1			TGTGCCAGCAGTGACGGGGGAATCGACGAGCAGTACTTC	CASSDGGIDEQYF		BETA_515	NA-BETA_515		2		0
084_D11_16_032_PRE_CD3POS_A	0	PRE	CD4	PRE_CD4	58	0.91	148	1	TGTGCAGAGAATAACTATGGTCAGAATTTTGTCTTT	CAENNYGQNFVF	TGCGCCAGCAGCCAAGATGGGGTGGCAGGGTCAAATCAGCCCCAGCATTTT	CASSQDGVAGSNQPQHF	ALPHA_92	BETA_102	ALPHA_92-BETA_102	1	1	1	1
084_D11_16_032_PRE_CD3POS_B	0	PRE	CD4	PRE_CD4			174	0.76			TGTGCCACCAGTGATCCCGGACAGGGGAGGACTGAAGCTTTCTTT	CATSDPGQGRTEAFF		BETA_175	NA-BETA_175		1		0
085_E11_16_032_PRE_CD3POS_A	1	PRE	CD8	PRE_CD8			10	1			TGTGCCAGCAGCTTAGCGAGGGATACGCAGTATTTT	CASSLARDTQYF		BETA_392	NA-BETA_392		1		0
085_E11_16_032_PRE_CD3POS_B	0	PRE	CD4	PRE_CD4	181	0.65	318	1	TGTGCAATGAGCGCGCTCAATGGTGGGGCAAACAACCTCTTCTTT	CAMSALNGGANNLFF	TGTGCCAGCAGTTACAGGCAAGATAATTCACCCCTCCACTTT	CASSYRQDNSPLHF	ALPHA_70	BETA_540	ALPHA_70-BETA_540	1	1	1	1
086_F11_16_032_POST_CD3POS_B	2	POST	CD8	POST_CD8			96	1			TGCGCCAGCAGTTGGGACAGGGCTACCTACGAGCAGTACTTC	CASSWDRATYEQYF		BETA_154	NA-BETA_154		1		0
087_G11_16_032_POST_CD3POS_A	2	POST	CD8	POST_CD8	74	1			TGTGCAGAGAATCCCCCAAACACCGGTAACCAGTTCTATTTT	CAENPPNTGNQFYF			ALPHA_97		ALPHA_97-NA	4			0
087_G11_16_032_POST_CD3POS_B	2	POST	CD8	POST_CD8	52	1	40	0.95	TGTGCTGCCCCGAACTCAAATTCCGGGTATGCACTCAACTTC	CAAPNSNSGYALNF	TGTGCCAGCTCACCCTTACCGACAGAAAGCTACGAGCAGTACTTC	CASSPLPTESYEQYF	ALPHA_401	BETA_633	ALPHA_401-BETA_633	6	7	6	2
089_A12_16_032_PRE_CD3POS_B	1	PRE	CD8	PRE_CD8	293	0.54	172	1	TGTGCAATGTGGACCGGTAACCAGTTCTATTTT	CAMWTGNQFYF	TGCGCCAGCAGCTTGGTTTCCGGGGGTAATTCACCCCTCCACTTT	CASSLVSGGNSPLHF	ALPHA_79	BETA_147	ALPHA_79-BETA_147	1	1	1	1
090_B12_16_032_POST_CD3POS_A	0	POST	CD4	POST_CD4	10	1	53	1	TGTGCCGTGAAAGCTGCAGGCAACAAGCTAACTTTT	CAVKAAGNKLTF	TGTGCCAGCAGTGAAAATTCAGCCTACTATGGCTACACCTTC	CASSENSAYYGYTF	ALPHA_228	BETA_498	ALPHA_228-BETA_498	1	1	1	1
090_B12_16_032_POST_CD3POS_B	2	POST	CD8	POST_CD8	72	1	122	1	TGTGCTGCCCCGAACTCAAATTCCGGGTATGCACTCAACTTC	CAAPNSNSGYALNF	TGTGCCAGCTCACCCTTACCGACAGAAAGCTACGAGCAGTACTTC	CASSPLPTESYEQYF	ALPHA_401	BETA_633	ALPHA_401-BETA_633	6	7	6	2
090_B12_16_032_PRE_CD3POS_B	0	PRE	CD4	PRE_CD4			127	1			TGCAGTGCTAGAAGGGACCCGCAAGCTTTCTTT	CSARRDPQAFF		BETA_27	NA-BETA_27		1		0
091_C12_16_032_POST_CD3POS_B	0	POST	CD4	POST_CD4			57	1			TGCGCCAGCAGCCAAGATGGGGCCGTCGCCTACAATGAGCAGTTCTTC	CASSQDGAVAYNEQFF		BETA_101	NA-BETA_101		1		0
091_C12_16_032_PRE_CD3POS_B	0	PRE	CD4	PRE_CD4	250	1	317	1	TGTGCAGGGCCAAATGCTGGTGGTACTAGCTATGGAAAGCTGACATTT	CAGPNAGGTSYGKLTF	TGTGCCAGCACCCAGCGGGGGTTCGGCAATCAGCCCCAGCATTTT	CASTQRGFGNQPQHF	ALPHA_194	BETA_189	ALPHA_194-BETA_189	1	1	1	1
092_D12_16_032_POST_CD3POS_B	2	POST	CD8	POST_CD8	138	1			TGTGCCTGTGACACCGTGGCTGGGGGATACGGGTCCACCGATAAACTCATCTTT	CACDTVAGGYGSTDKLIF			ALPHA_274		ALPHA_274-NA	9			0
092_D12_16_032_PRE_CD3POS_A	0	PRE	CD4	PRE_CD4	38	1			TGTGCCGTGATCGGCTCTAGCAACACAGGCAAACTAATCTTT	CAVIGSSNTGKLIF			ALPHA_249		ALPHA_249-NA	1			0
094_F12_16_032_POST_CD3POS_A	2	POST	CD8	POST_CD8	53	1	155	1	TGTGCCGTGAATATTGGTGGAGGCTTCAAAACTATCTTT	CAVNIGGGFKTIF	TGTGCCAGCGAAGGGCCTGGGGGCACTGAAGCTTTCTTT	CASEGPGGTEAFF	ALPHA_236	BETA_616	ALPHA_236-BETA_616	1	1	1	1
095_G12_16_032_POST_CD3POS_A	2	POST	CD8	POST_CD8	11	1			TGTGCTCTGAGTGGGGGGGTTACCGGCACTGCCAGTAAACTCACCTTT	CALSGGVTGTASKLTF			ALPHA_364		ALPHA_364-NA	4			0
095_G12_16_032_POST_CD3POS_B	0	POST	CD4	POST_CD4	75	1	97	1	TGTGCTGTGAGAGATTACAATAATGCAGGCAACATGCTCACCTTT	CAVRDYNNAGNMLTF	TGTGCCAGCAGCCAAGGACAGGGGGGAGATACGCAGTATTTT	CASSQGQGGDTQYF	ALPHA_456	BETA_239	ALPHA_456-BETA_239	1	1	1	1
001_A1_16_034_POST_CD3POS_A	0	POST	CD4	POST_CD4	142	1	257	1	TGTGCTTATAGGAGAGAAACCAGTGGCTCTAGGTTGACCTTT	CAYRRETSGSRLTF	TGTGCCAGTAGTATCTTGACAGGAAAATATACGAACACCGGGGAGCTGTTTTTT	CASSILTGKYTNTGELFF	ALPHA_549	BETA_665	ALPHA_549-BETA_665	1	1	1	1
001_A1_16_034_POST_CD3POS_B	1	POST	CD8	POST_CD8	86	1	171	1	TGTGCTACGGACCCGGCAGGAACTGCTCTGATCTTT	CATDPAGTALIF	TGTGCCAGCAGCTCGCCGGGACGAGAGACCCAGTACTTC	CASSSPGRETQYF	ALPHA_303	BETA_362	ALPHA_303-BETA_362	18	22	17	2
001_A1_16_034_POST_CD3POS_C	2	POST	CD8	POST_CD8	47	1			TGTGCTGTGAGTGATGAAACTGGGGCAAACAACCTCTTCTTT	CAVSDETGANNLFF			ALPHA_480		ALPHA_480-NA	1			0
002_B1_16_034_POST_CD3POS_C	1	POST	CD8	POST_CD8	28	1	40	0.69	TGTGCTCTGATCCTTACCATGAATTCAGGATACAGCACCCTCACCTTT	CALILTMNSGYSTLTF	TGTGCCAGCTCACCGTCCGGGACAGGGCCGGCCGGGGAGCTGTTTTTT	CASSPSGTGPAGELFF	ALPHA_371	BETA_635	ALPHA_371-BETA_635	10	2	2	2
002_B1_16_034_PRE_CD3POS_C	0	PRE	CD4	PRE_CD4	9	0.82	181	1	TGTGCCTTGTTTTCAGATGGCCAGAAGCTGCTCTTT	CALFSDGQKLLF	TGCAGTGCTCTAGCGGTAGGGGAGACCCAGTACTTC	CSALAVGETQYF	ALPHA_285	BETA_69	ALPHA_285-BETA_69	1	1	1	1
003_C1_16_034_POST_CD3POS_A	2	POST	CD8	POST_CD8	26	1	55	1	TGTGTGGTGAGCGAGGGAGGAAGCCAAGGAAATCTCATCTTT	CVVSEGGSQGNLIF	TGTGCCAGCAGCGATAGTAAGGACGGGATTAATGAAAAACTGTTTTTT	CASSDSKDGINEKLFF	ALPHA_619	BETA_319	ALPHA_619-BETA_319	1	1	1	1
003_C1_16_034_POST_CD3POS_B	0	POST	CD4	POST_CD4	57	0.48	65	0.96	TGTGCAGGTACTGGAGGCTTCAAAACTATCTTT	CAGTGGFKTIF	TGTGCCAGCAGTGAATATCAGGGGGGAAAATACGAGCAGTACTTC	CASSEYQGGKYEQYF	ALPHA_202	BETA_511	ALPHA_202-BETA_511	1	1	1	1
003_C1_16_034_PRE_CD3POS_A	1	PRE	CD8	PRE_CD8	106	1			TGTGCCTGTGACACGGGTTACTGGGGGATACGGGAACCATACACCGATAAACTCATCTTT	CACDTGYWGIREPYTDKLIF			ALPHA_277		ALPHA_277-NA	1			0
003_C1_16_034_PRE_CD3POS_C	1	PRE	CD8	PRE_CD8	51	1	71	1	TGTGCTACGGACCCGGCAGGAACTGCTCTGATCTTT	CATDPAGTALIF	TGTGCCAGCAGCTCGCCGGGACGAGAGACCCAGTACTTC	CASSSPGRETQYF	ALPHA_303	BETA_362	ALPHA_303-BETA_362	18	22	17	2
004_D1_16_034_POST_CD3POS_A	0	POST	CD4	POST_CD4	122	0.96	133	1	TGTGCAGCAGAGGACGACTACAAGCTCAGCTTT	CAAEDDYKLSF	TGTGCCAGCAGTTCAGGGGGCACAGATACGCAGTATTTT	CASSSGGTDTQYF	ALPHA_158	BETA_563	ALPHA_158-BETA_563	1	1	1	1
004_D1_16_034_POST_CD3POS_C	1	POST	CD8	POST_CD8	55	0.96	88	1	TGTGCTGTGAGTGTCACCGGTAACCAGTTCTATTTT	CAVSVTGNQFYF	TGTGCCAGTACGGACTACAGAACACAAGAGACCCAGTACTTC	CASTDYRTQETQYF	ALPHA_486	BETA_649	ALPHA_486-BETA_649	8	9	7	2
005_E1_16_034_POST_CD3POS_B	2	POST	CD8	POST_CD8	21	1	385	1	TGTGCCTGCTGGGGTGGAGGTAGCAACTATAAACTGACATTT	CACWGGGSNYKLTF	TGTGCCAGCAGCCACGCCGGGACTAGAGGCCAGTACTTC	CASSHAGTRGQYF	ALPHA_267	BETA_245	ALPHA_267-BETA_245	1	1	1	1
006_F1_16_034_POST_CD3POS_A	2	POST	CD8	POST_CD8	47	1	68	1	TGTGCCTCCCCCTTCTTCACGGGAGGAGGAAACAAACTCACCTTT	CASPFFTGGGNKLTF	TGCGCCAGCAGTTTAACAGGGCTTTCCGGAAACACCATATATTTT	CASSLTGLSGNTIYF	ALPHA_263	BETA_155	ALPHA_263-BETA_155	4	4	4	2
006_F1_16_034_POST_CD3POS_B	1	POST	CD8	POST_CD8	430	1	303	0.8	TGTGCTCTGATCCTTACCATGAATTCAGGATACAGCACCCTCACCTTT	CALILTMNSGYSTLTF	TGTGCCAGCAGCTTAATAGTCCACACTAAAGAGACCCAGTACTTC	CASSLIVHTKETQYF	ALPHA_371	BETA_372	ALPHA_371-BETA_372	10	13	8	2
006_F1_16_034_POST_CD3POS_C	1	POST	CD8	POST_CD8	314	1	289	0.96	TGTGCTACGGACCCGGCAGGAACTGCTCTGATCTTT	CATDPAGTALIF	TGTGCCAGCAGCTCGCCGGGACGAGAGACCCAGTACTTC	CASSSPGRETQYF	ALPHA_303	BETA_362	ALPHA_303-BETA_362	18	22	17	2
007_G1_16_034_POST_CD3POS_A	1	POST	CD8	POST_CD8			62	1			TGTGCCAGCAGCTTAATAGTCCACACTAAAGAGACCCAGTACTTC	CASSLIVHTKETQYF		BETA_372	NA-BETA_372		13		0
007_G1_16_034_POST_CD3POS_C	1	POST	CD8	POST_CD8	36	1	207	1	TGTGCTCTGATCCTTACCATGAATTCAGGATACAGCACCCTCACCTTT	CALILTMNSGYSTLTF	TGTGCCAGCAGCTTAATAGTCCACACTAAAGAGACCCAGTACTTC	CASSLIVHTKETQYF	ALPHA_371	BETA_372	ALPHA_371-BETA_372	10	13	8	2
008_H1_16_034_POST_CD3POS_A	1	POST	CD8	POST_CD8	123	1	184	0.6	TGTGCTCTGATCCTTACCATGAATTCAGGATACAGCACCCTCACCTTT	CALILTMNSGYSTLTF	TGTGCCAGCAGCTTAATAGTCCACACTAAAGAGACCCAGTACTTC	CASSLIVHTKETQYF	ALPHA_371	BETA_372	ALPHA_371-BETA_372	10	13	8	2
008_H1_16_034_POST_CD3POS_B	1	POST	CD8	POST_CD8			204	1			TGTGCCAGCAGCTCGCCGGGACGAGAGACCCAGTACTTC	CASSSPGRETQYF		BETA_362	NA-BETA_362		22		0
008_H1_16_034_PRE_CD3POS_A	1	PRE	CD8	PRE_CD8	90	1	116	1	TGTGCCGTGGGGGGCGTGATATCTAACTTTGGAAATGAGAAATTAACCTTT	CAVGGVISNFGNEKLTF	TGTGCCAGTAGGGTAGACATCTGGAACACTGAAGCTTTCTTT	CASRVDIWNTEAFF	ALPHA_255	BETA_659	ALPHA_255-BETA_659	1	1	1	1
008_H1_16_034_PRE_CD3POS_B	1	PRE	CD8	PRE_CD8	55	1	90	1	TGTGCTACGGACGATTATGGAGGAAGCCAAGGAAATCTCATCTTT	CATDDYGGSQGNLIF	TGTGCCAGCTCGGGTCTTTCGACGGAGACCCAGTACTTC	CASSGLSTETQYF	ALPHA_307	BETA_645	ALPHA_307-BETA_645	2	2	2	2
009_A2_16_034_POST_CD3POS_A	1	POST	CD8	POST_CD8	51	1	242	0.79	TGTGCTCTGATCCTTACCATGAATTCAGGATACAGCACCCTCACCTTT	CALILTMNSGYSTLTF	TGTGCCAGCAGCTTAATAGTCCACACTAAAGAGACCCAGTACTTC	CASSLIVHTKETQYF	ALPHA_371	BETA_372	ALPHA_371-BETA_372	10	13	8	2
009_A2_16_034_POST_CD3POS_B	0	POST	CD4	POST_CD4			116	1			TGCAGTGCTAGCCAACGGGGTGAGGACTATGGCTACACCTTC	CSASQRGEDYGYTF		BETA_47	NA-BETA_47		1		0
009_A2_16_034_POST_CD3POS_C	1	POST	CD8	POST_CD8			164	0.53			TGTGCCAGCAGCTTAATAGTCCACACTAAAGAGACCCAGTACTTC	CASSLIVHTKETQYF		BETA_372	NA-BETA_372		13		0
009_A2_16_034_PRE_CD3POS_C	2	PRE	CD8	PRE_CD8	184	1	88	1	TGTGCCATTTTCTATGGTCAGAATTTTGTCTTT	CAIFYGQNFVF	TGTGCCAGCAGCCAAGTAGCGGGGGGGCCTTACGAGCAGTACTTC	CASSQVAGGPYEQYF	ALPHA_209	BETA_241	ALPHA_209-BETA_241	1	1	1	1
010_B2_16_034_POST_CD3POS_B	1	POST	CD8	POST_CD8	11	1	23	0.96	TGTGCTGTGAGTGTCACCGGTAACCAGTTCTATTTT	CAVSVTGNQFYF	TGTGCCAGTACGGACTACAGAACACAAGAGACCCAGTACTTC	CASTDYRTQETQYF	ALPHA_486	BETA_649	ALPHA_486-BETA_649	8	9	7	2
010_B2_16_034_POST_CD3POS_C	1	POST	CD8	POST_CD8			98	1			TGCGCCAGCAGCCACGGACGTGGCACAGATACGCAGTATTTT	CASSHGRGTDTQYF		BETA_112	NA-BETA_112		1		0
011_C2_16_034_POST_CD3POS_A	1	POST	CD8	POST_CD8	63	0.94	52	1	TGTGCTACGGACCAGGCAGGAACTGCTCTGATCTTT	CATDQAGTALIF	TGTGCCAGCAGCCACGCGGGACTCCCGGACCAAGAGACCCAGTACTTC	CASSHAGLPDQETQYF	ALPHA_301	BETA_246	ALPHA_301-BETA_246	9	9	8	2
011_C2_16_034_POST_CD3POS_B	0	POST	CD4	POST_CD4	29	1	315	1	TGTGCAGCAAGTAGGTGGGGCACCGACAAGCTCATCTTT	CAASRWGTDKLIF	TGTGCCAGCAGCTCCGGAGGTGGAGAGACCCAGTACTTC	CASSSGGGETQYF	ALPHA_152	BETA_355	ALPHA_152-BETA_355	1	1	1	1
012_D2_16_034_POST_CD3POS_A	2	POST	CD8	POST_CD8	60	1	324	1	TGTGCTGGGCCCACTATAAGAGGAACCTACAAATACATCTTT	CAGPTIRGTYKYIF	TGCGCCAGCAGCCCCGCCGTGGGGGGGCATGGCACAGATACGCAGTATTTT	CASSPAVGGHGTDTQYF	ALPHA_415	BETA_117	ALPHA_415-BETA_117	1	2	1	1
012_D2_16_034_POST_CD3POS_B	1	POST	CD8	POST_CD8	92	1	88	1	TGTGCTACGGACCCTGCAGGAACTGCTCTGATCTTT	CATDPAGTALIF	TGTGCCAGCAGCCCGCGGCAAGAGACCCAGTACTTC	CASSPRQETQYF	ALPHA_304	BETA_279	ALPHA_304-BETA_279	2	2	2	2
012_D2_16_034_POST_CD3POS_C	1	POST	CD8	POST_CD8	7	1	292	0.99	TGTGCAGCAAGCGCGTCCGGTAACCAGTTCTATTTT	CAASASGNQFYF	TGTGCCAGCAGCTCACTACAGGGGCTCCTCTCCTACGAGCAGTACTTC	CASSSLQGLLSYEQYF	ALPHA_137	BETA_345	ALPHA_137-BETA_345	1	3	1	1
012_D2_16_034_PRE_CD3POS_A	0	PRE	CD4	PRE_CD4			59	1			TGTGCCAGTAGGGGGGGTAGCAATCAGCCCCAGCATTTT	CASRGGSNQPQHF		BETA_658	NA-BETA_658		1		0
013_E2_16_034_POST_CD3POS_B	0	POST	CD4	POST_CD4	51	1	67	1	TGTGCTACGGACGCCTCAGGATACAGCACCCTCACCTTT	CATDASGYSTLTF	TGTGCCAGCAGTGTTGACAGGGGGCGATCCTACGAGCAGTACTTC	CASSVDRGRSYEQYF	ALPHA_308	BETA_536	ALPHA_308-BETA_536	1	1	1	1
013_E2_16_034_PRE_CD3POS_A	0	PRE	CD4	PRE_CD4	44	1	54	1	TGTGCAGCAAGCAAGGTGGGTGGAGGTAGCAACTATAAACTGACATTT	CAASKVGGGSNYKLTF	TGTGCCAGTCGGACAGGGGCGGATAATTCACCCCTCCACTTT	CASRTGADNSPLHF	ALPHA_123	BETA_679	ALPHA_123-BETA_679	1	1	1	1
013_E2_16_034_PRE_CD3POS_C	0	PRE	CD4	PRE_CD4	47	1	23	1	TGTGCCCACCTGAGTGGAGGTAGCAACTATAAACTGACATTT	CAHLSGGSNYKLTF	TGTGCCAGCAGTTACACTAGCGGGGTTGCCTACAATGAGCAGTTCTTC	CASSYTSGVAYNEQFF	ALPHA_211	BETA_539	ALPHA_211-BETA_539	1	1	1	1
014_F2_16_034_POST_CD3POS_C	1	POST	CD8	POST_CD8	5	1	139	1	TGCCTCGTGGGTGGAGCTGGCAACACAGGCAAACTAATCTTT	CLVGGAGNTGKLIF	TGTGCCAGCAGCTCCGTAGGTTCCTACGAGCAGTACTTC	CASSSVGSYEQYF	ALPHA_36	BETA_357	ALPHA_36-BETA_357	4	4	4	2
015_G2_16_034_POST_CD3POS_A	1	POST	CD8	POST_CD8	21	1	232	1	TGTGTTGTGAGGCGCCTGAACACCGGTAACCAGTTCTATTTT	CVVRRLNTGNQFYF	TGCGCCAGCAGCCAAGCTACAGGGGGTAATCAGCCCCAGCATTTT	CASSQATGGNQPQHF	ALPHA_633	BETA_105	ALPHA_633-BETA_105	1	1	1	1
015_G2_16_034_POST_CD3POS_B	2	POST	CD8	POST_CD8	66	1	53	1	TGTGCTTATAGGAGTGGAAGTGGAGGTAGCAACTATAAACTGACATTT	CAYRSGSGGSNYKLTF	TGTGCCACCAGCAGACCACCCGAGACCTACACAGATACGCAGTATTTT	CATSRPPETYTDTQYF	ALPHA_557	BETA_166	ALPHA_557-BETA_166	1	1	1	1
015_G2_16_034_PRE_CD3POS_B	2	PRE	CD8	PRE_CD8			108	1			TGTGCCAGCAGCCAAGACTCGGACGGGTGGGGTCAGCCCCAGCATTTT	CASSQDSDGWGQPQHF		BETA_230	NA-BETA_230		1		0
015_G2_16_034_PRE_CD3POS_C	0	PRE	CD4	PRE_CD4			201	1			TGTGCCAGCAGCCTTAAGGGAGGGGGCACTGAAGCTTTCTTT	CASSLKGGGTEAFF		BETA_310	NA-BETA_310		1		0
016_H2_16_034_POST_CD3POS_B	1	POST	CD8	POST_CD8	62	1	29	0.97	TGTGCTACGGACGATTATGGAGGAAGCCAAGGAAATCTCATCTTT	CATDDYGGSQGNLIF	TGTGCCAGCTCGGGTCTTTCGACGGAGACCCAGTACTTC	CASSGLSTETQYF	ALPHA_307	BETA_645	ALPHA_307-BETA_645	2	2	2	2
016_H2_16_034_PRE_CD3POS_B	1	PRE	CD8	PRE_CD8	64	1	146	1	TGTGCTACGGACCCGGCAGGAACTGCTCTGATCTTT	CATDPAGTALIF	TGTGCCAGCAGCTCGCCGGGACGAGAGACCCAGTACTTC	CASSSPGRETQYF	ALPHA_303	BETA_362	ALPHA_303-BETA_362	18	22	17	2
017_A3_16_034_POST_CD3POS_A	1	POST	CD8	POST_CD8	134	1	192	1	TGTGCTACGGACCCGGCAGGAACTGCTCTGATCTTT	CATDPAGTALIF	TGTGCCAGCAGCTCGCCGGGACGAGAGACCCAGTACTTC	CASSSPGRETQYF	ALPHA_303	BETA_362	ALPHA_303-BETA_362	18	22	17	2
017_A3_16_034_POST_CD3POS_C	2	POST	CD8	POST_CD8			71	1			TGTGCCAGCTCACCACCCACAGAAAGCTATGGCTACACCTTC	CASSPPTESYGYTF		BETA_627	NA-BETA_627		1		0
017_A3_16_034_PRE_CD3POS_C	0	PRE	CD4	PRE_CD4			141	1			TGTGCCAGCAGTGAACAGGGTTACAATGAGCAGTTCTTC	CASSEQGYNEQFF		BETA_499	NA-BETA_499		1		0
018_B3_16_034_PRE_CD3POS_B	0	PRE	CD4	PRE_CD4	11	1	5	1	TGTGCTTTCGGAGGAAGCCAAGGAAATCTCATCTTT	CAFGGSQGNLIF	TGTGCCAGTAGGAGGGGAATGACTAGCGGGGGGGCCGGGGAGCTGTTTTTT	CASRRGMTSGGAGELFF	ALPHA_583	BETA_654	ALPHA_583-BETA_654	2	2	2	2
018_B3_16_034_PRE_CD3POS_C	0	PRE	CD4	PRE_CD4	34	1			TGTGCTCTGAGTGATCAGGGTGGTGCTACAAACAAGCTCATCTTT	CALSDQGGATNKLIF			ALPHA_357		ALPHA_357-NA	1			0
019_C3_16_034_POST_CD3POS_A	2	POST	CD8	POST_CD8			102	1			TGCAGTGCTAGAGGCCCAGAGACCCAGTACTTC	CSARGPETQYF		BETA_39	NA-BETA_39		2		0
020_D3_16_034_POST_CD3POS_A	1	POST	CD8	POST_CD8	3	1	228	0.96	TGTGCTACGGACCCGGCAGGAACTGCTCTGATCTTT	CATDPAGTALIF	TGTGCCAGCAGCTCGCCGGGACGAGAGACCCAGTACTTC	CASSSPGRETQYF	ALPHA_303	BETA_362	ALPHA_303-BETA_362	18	22	17	2
020_D3_16_034_POST_CD3POS_B	1	POST	CD8	POST_CD8	10	1	75	1	TGTGCTACGGACCAGGCAGGAACTGCTCTGATCTTT	CATDQAGTALIF	TGTGCCAGCAGCCACGCGGGACTCCCGGACCAAGAGACCCAGTACTTC	CASSHAGLPDQETQYF	ALPHA_301	BETA_246	ALPHA_301-BETA_246	9	9	8	2
022_F3_16_034_POST_CD3POS_B	0	POST	CD4	POST_CD4			146	1			TGTGCCAGCAGTCCTCAACCGGGACTAGCGGGGGAGGCCTACGAGCAGTACTTC	CASSPQPGLAGEAYEQYF		BETA_492	NA-BETA_492		1		0
022_F3_16_034_POST_CD3POS_C	2	POST	CD8	POST_CD8	120	1	97	1	TGTGCTACGGACCAGGCAGGAACTGCTCTGATCTTT	CATDQAGTALIF	TGTGCCAGCAGCCACGCGGGACTCCCGGACCAAGAGACCCAGTACTTC	CASSHAGLPDQETQYF	ALPHA_301	BETA_246	ALPHA_301-BETA_246	9	9	8	2
022_F3_16_034_PRE_CD3POS_B	2	PRE	CD8	PRE_CD8	129	1			TGTGCCTGTGACACCGTTAAGGGGGGCACCGCCGAGGTGGCCGATAAACTCATCTTT	CACDTVKGGTAEVADKLIF			ALPHA_276		ALPHA_276-NA	1			0
023_G3_16_034_POST_CD3POS_B	1	POST	CD8	POST_CD8	129	1	156	1	TGTGCTTGCCTGAGAAGCCAAGGAAATCTCATCTTT	CACLRSQGNLIF	TGTGCCAGCAGCTCCCCCGGGACTAGCGGGGGGGCCGTCTACAATGAGCAGTTCTTC	CASSSPGTSGGAVYNEQFF	ALPHA_568	BETA_350	ALPHA_568-BETA_350	2	2	2	2
023_G3_16_034_PRE_CD3POS_C	1	PRE	CD8	PRE_CD8	110	1	44	1	TGTGCCTCCGATTCAGGATACAGCACCCTCACCTTT	CASDSGYSTLTF	TGTGCCTGGCGAAAGCGGGGGGCCCCCTACAATGAGCAGTTCTTC	CAWRKRGAPYNEQFF	ALPHA_264	BETA_699	ALPHA_264-BETA_699	2	2	2	2
024_H3_16_034_POST_CD3POS_A	0	POST	CD4	POST_CD4			218	1			TGTGCCATCAGCGATACTCACAACTACGAGCAGTACTTC	CAISDTHNYEQYF		BETA_682	NA-BETA_682		1		0
024_H3_16_034_POST_CD3POS_B	2	POST	CD8	POST_CD8			84	1			TGTGCCAGCAGCTCCTCTATCTACGAGCAGTACTTC	CASSSSIYEQYF		BETA_359	NA-BETA_359		3		0
024_H3_16_034_POST_CD3POS_C	0	POST	CD4	POST_CD4	278	1			TGTGCCTGTGTTCCACTGGGGGGATCGGCCACCGATAAACTCATCTTT	CACVPLGGSATDKLIF			ALPHA_282		ALPHA_282-NA	1			0
024_H3_16_034_PRE_CD3POS_A	1	PRE	CD8	PRE_CD8	30	0.62	149	0.82	TGTAACAACACAGGCTTTCAGAAACTTGTATTT	CNNTGFQKLVF	TGTGCCAGCAGCTCCGCGATGGACCGGGACAGGCGGTATGAGCAGTTCTTC	CASSSAMDRDRRYEQFF	ALPHA_51	BETA_353	ALPHA_51-BETA_353	1	1	1	1
024_H3_16_034_PRE_CD3POS_B	0	PRE	CD4	PRE_CD4	127	1	211	1	TGTGCTCCCGAAAAAGCTGCAGGCAACAAGCTAACTTTT	CAPEKAAGNKLTF	TGTGCCAGCAGTTCCCCCAGGGGGCTTAGTGAGCAGTTCTTC	CASSSPRGLSEQFF	ALPHA_317	BETA_567	ALPHA_317-BETA_567	1	1	1	1
025_A4_16_034_POST_CD3POS_A	2	POST	CD8	POST_CD8	19	1	46	1	TGTGCAGCAAGCGCCCTTAGTTCTGGGGGTTACCAGAAAGTTACCTTT	CAASALSSGGYQKVTF	TGTGCCAGCAGTTACTCAATCGGGGGGCTGTTGAACACTGAAGCTTTCTTT	CASSYSIGGLLNTEAFF	ALPHA_134	BETA_551	ALPHA_134-BETA_551	1	1	1	1
025_A4_16_034_POST_CD3POS_C	1	POST	CD8	POST_CD8	68	1			TGTGCTCTCGTAAAGGAACACTGGGGGATTGACACCGATAAACTCATCTTT	CALVKEHWGIDTDKLIF			ALPHA_336		ALPHA_336-NA	1			0
025_A4_16_034_PRE_CD3POS_A	1	PRE	CD8	PRE_CD8	33	1	173	1	TGTGCTTTCATGGCTGGCTATGGTCAGAATTTTGTCTTT	CAFMAGYGQNFVF	TGTGCCAGTAGTATCGGAGGCGGAAACACTGAAGCTTTCTTT	CASSIGGGNTEAFF	ALPHA_579	BETA_663	ALPHA_579-BETA_663	1	1	1	1
026_B4_16_034_POST_CD3POS_A	0	POST	CD4	POST_CD4	62	1	43	1	TGTGCTCTAGGAGAATCGGGAGGAGGAAACAAACTCACCTTT	CALGESGGGNKLTF	TGTGCCAGCAGTTACACGACGGGACTCTCCTACGAGCAGTACTTC	CASSYTTGLSYEQYF	ALPHA_329	BETA_538	ALPHA_329-BETA_538	1	1	1	1
027_C4_16_034_POST_CD3POS_A	2	POST	CD8	POST_CD8			258	1			TGCGCCAGCAGCCCCGCCGTGGGGGGGCATGGCACAGATACGCAGTATTTT	CASSPAVGGHGTDTQYF		BETA_117	NA-BETA_117		2		0
027_C4_16_034_POST_CD3POS_B	1	POST	CD8	POST_CD8	22	1	62	0.94	TGTGCCGTGATCAACATGAAAACCTCCTACGACAAGGTGATATTT	CAVINMKTSYDKVIF	TGTGCCAGCTCACCTTTTCCCAGTAAGTCGAATCAGCCCCAGCATTTT	CASSPFPSKSNQPQHF	ALPHA_247	BETA_637	ALPHA_247-BETA_637	1	2	1	1
027_C4_16_034_PRE_CD3POS_B	1	PRE	CD8	PRE_CD8	1	1	40	1	TGTGCTGTGAGGGATTCAGGAGGAAGCTACATACCTACATTT	CAVRDSGGSYIPTF	TGCGCCAGCAGCCAAGAGACTAGGGCCCACTATGGCTACACCTTC	CASSQETRAHYGYTF	ALPHA_469	BETA_97	ALPHA_469-BETA_97	1	1	1	1
028_D4_16_034_POST_CD3POS_B	0	POST	CD4	POST_CD4	13	1	140	1	TGTGCAATGAGAGAGGGTGAAAGCCAAGGAAATCTCATCTTT	CAMREGESQGNLIF	TGCGCCAGCAGCTTGTGGTCAGGGAGGTACGAGCAGTACTTC	CASSLWSGRYEQYF	ALPHA_64	BETA_148	ALPHA_64-BETA_148	1	1	1	1
028_D4_16_034_POST_CD3POS_C	0	POST	CD4	POST_CD4	117	1	32	1	TGTGCTGGGCCCCCAACTGACAGCTGGGGGAAATTGCAGTTT	CAGPPTDSWGKLQF	TGTGCCCTAGGAGGGGCTGCAACTAATGAAAAACTGTTTTTT	CALGGAATNEKLFF	ALPHA_417	BETA_694	ALPHA_417-BETA_694	1	1	1	1
029_E4_16_034_POST_CD3POS_A	2	POST	CD8	POST_CD8	66	1	87	1	TGTGCCTCCCCCTTCTTCACGGGAGGAGGAAACAAACTCACCTTT	CASPFFTGGGNKLTF	TGCGCCAGCAGTTTAACAGGGCTTTCCGGAAACACCATATATTTT	CASSLTGLSGNTIYF	ALPHA_263	BETA_155	ALPHA_263-BETA_155	4	4	4	2
029_E4_16_034_POST_CD3POS_B	2	POST	CD8	POST_CD8	74	1	103	1	TGTGCACAGGGGGACAGCTGGGGGAAATTGCAGTTT	CAQGDSWGKLQF	TGTGCCATCAGCCTGGAGAGGGGACAGAAGTCTAATTCACCCCTCCACTTT	CAISLERGQKSNSPLHF	ALPHA_83	BETA_681	ALPHA_83-BETA_681	1	1	1	1
030_F4_16_034_POST_CD3POS_A	1	POST	CD8	POST_CD8	134	1	203	1	TGCCTCGTGGGTGGAGCTGGCAACACAGGCAAACTAATCTTT	CLVGGAGNTGKLIF	TGTGCCAGCAGCTCCGTAGGTTCCTACGAGCAGTACTTC	CASSSVGSYEQYF	ALPHA_36	BETA_357	ALPHA_36-BETA_357	4	4	4	2
030_F4_16_034_POST_CD3POS_C	2	POST	CD8	POST_CD8			627	1			TGTGCCAGCAGCTCCTCTATCTACGAGCAGTACTTC	CASSSSIYEQYF		BETA_359	NA-BETA_359		3		0
030_F4_16_034_PRE_CD3POS_A	1	PRE	CD8	PRE_CD8	31	1			TGTGCTGTGAGTGTCACCGGTAACCAGTTCTATTTT	CAVSVTGNQFYF			ALPHA_486		ALPHA_486-NA	8			0
030_F4_16_034_PRE_CD3POS_C	0	PRE	CD4	PRE_CD4			100	1			TGTGCCAGTAGGCTAGCGGGGGCCGACACCGGGGAGCTGTTTTTT	CASRLAGADTGELFF		BETA_656	NA-BETA_656		1		0
031_G4_16_034_POST_CD3POS_A	0	POST	CD4	POST_CD4	37	1	45	1	TGTGCTCTAAGGAACACCGACAAGCTCATCTTT	CALRNTDKLIF	TGTGCCAGCAGCCAAGATCCCTTACGGGCTAGCACTGAAGCTTTCTTT	CASSQDPLRASTEAFF	ALPHA_320	BETA_234	ALPHA_320-BETA_234	1	1	1	1
032_H4_16_034_POST_CD3POS_A	0	POST	CD4	POST_CD4	157	0.66			TGCCTCGTGGGTGACAGCGACTCTAACGACTACAAGCTCAGCTTT	CLVGDSDSNDYKLSF			ALPHA_30		ALPHA_30-NA	1			0
032_H4_16_034_POST_CD3POS_C	1	POST	CD8	POST_CD8			424	1			TGTGCCAGCAGCTCGCCGGGACGAGAGACCCAGTACTTC	CASSSPGRETQYF		BETA_362	NA-BETA_362		22		0
032_H4_16_034_PRE_CD3POS_A	2	PRE	CD8	PRE_CD8	132	0.87	105	0.85	TGCACCCTCCGGGGAGCTGGTGGTACTAGCTATGGAAAGCTGACATTT	CTLRGAGGTSYGKLTF	TGTGCCAGCAGTTTGCAGGGTGCAAACTACGAGCAGTACTTC	CASSLQGANYEQYF	ALPHA_1	BETA_600	ALPHA_1-BETA_600	2	2	2	2
032_H4_16_034_PRE_CD3POS_B	0	PRE	CD4	PRE_CD4			14	1			TGTGCCAGCAGCTTGGTAGGACCCACAGATACGCAGTATTTT	CASSLVGPTDTQYF		BETA_441	NA-BETA_441		1		0
033_A5_16_034_POST_CD3POS_A	0	POST	CD4	POST_CD4	171	1	49	1	TGTGTGGTCTCCCTGGGAGCCCAGAAGCTGGTATTT	CVVSLGAQKLVF	TGTGCCAGCAGTGAGCAGGGACCTGAGGATGGCTACACCTTC	CASSEQGPEDGYTF	ALPHA_595	BETA_517	ALPHA_595-BETA_517	1	1	1	1
034_B5_16_034_PRE_CD3POS_A	0	PRE	CD4	PRE_CD4	137	1	36	0.95	TGTGCTTTCGGAGGAAGCCAAGGAAATCTCATCTTT	CAFGGSQGNLIF	TGTGCCAGTAGGAGGGGAATGACTAGCGGGGGGGCCGGGGAGCTGTTTTTT	CASRRGMTSGGAGELFF	ALPHA_583	BETA_654	ALPHA_583-BETA_654	2	2	2	2
034_B5_16_034_PRE_CD3POS_C	0	PRE	CD4	PRE_CD4			109	1			TGTGCCACAGACTGGGGGCAAGAGACCCAGTACTTC	CATDWGQETQYF		BETA_162	NA-BETA_162		1		0
035_C5_16_034_POST_CD3POS_B	1	POST	CD8	POST_CD8	123	0.83	122	1	TGTGCTCTAAGTGGCAGAGGCTCAACCCTGGGGAGGCTATACTTT	CALSGRGSTLGRLYF	TGTGCCAGCAGTTTAAGTAACTATGGCTACACCTTC	CASSLSNYGYTF	ALPHA_322	BETA_580	ALPHA_322-BETA_580	3	3	3	2
035_C5_16_034_POST_CD3POS_C	0	POST	CD4	POST_CD4	122	1	52	1	TGTGCTACGGACCATGCTGGTTCTGCAAGGCAACTGACCTTT	CATDHAGSARQLTF	TGCGCCAGCAGCAACCCCACAGGGGAAAAACTGTTTTTT	CASSNPTGEKLFF	ALPHA_302	BETA_87	ALPHA_302-BETA_87	1	1	1	1
036_D5_16_034_POST_CD3POS_C	2	POST	CD8	POST_CD8	214	1	299	1	TGCGGCAGCTTCAAAGCTGCAGGCAACAAGCTAACTTTT	CGSFKAAGNKLTF	TGTGCCAGCAGCTTAGAGGCCGGCTGGAACGAGCAGTACTTC	CASSLEAGWNEQYF	ALPHA_49	BETA_382	ALPHA_49-BETA_382	2	2	2	2
036_D5_16_034_PRE_CD3POS_C	2	PRE	CD8	PRE_CD8			218	1			TGTGCCAGCAGCTTTGAAAAGCGGGCAGATACGCAGTATTTT	CASSFEKRADTQYF		BETA_449	NA-BETA_449		1		0
037_E5_16_034_POST_CD3POS_A	1	POST	CD8	POST_CD8			345	1			TGTGCCAGCAGCTCACTACAGGGGCTCCTCTCCTACGAGCAGTACTTC	CASSSLQGLLSYEQYF		BETA_345	NA-BETA_345		3		0
038_F5_16_034_POST_CD3POS_B	2	POST	CD8	POST_CD8			24	1			TGTGCCAGCAGCCCCAGCTTCGCCAGGGTGGGCGGGGAGCTGTTTTTT	CASSPSFARVGGELFF		BETA_264	NA-BETA_264		1		0
038_F5_16_034_POST_CD3POS_C	0	POST	CD4	POST_CD4			89	1			TGCGCCAGCACTGAAGGGACAGCTTACAATGAGCAGTTCTTC	CASTEGTAYNEQFF		BETA_85	NA-BETA_85		1		0
038_F5_16_034_PRE_CD3POS_A	0	PRE	CD4	PRE_CD4			29	1			TGTGCCAGCAGTGAGGGACAGATTGATAATTCACCCCTCCACTTT	CASSEGQIDNSPLHF		BETA_519	NA-BETA_519		1		0
038_F5_16_034_PRE_CD3POS_B	2	PRE	CD8	PRE_CD8	24	1	58	1	TGTGCTTATAGGAGCGGAGGGGCTGGGAGTTACCAACTCACTTTC	CAYRSGGAGSYQLTF	TGTGCCAGCAGTTTAGTAGCGGGAACGACCCAGTACTTC	CASSLVAGTTQYF	ALPHA_556	BETA_591	ALPHA_556-BETA_591	1	1	1	1
039_G5_16_034_POST_CD3POS_B	0	POST	CD4	POST_CD4	16	1	65	1	TGTGCTCTTGGGGAAAAAAAGGGTGGAGGTAGCAACTATAAACTGACATTT	CALGEKKGGGSNYKLTF	TGCAGCGCGACCCGGGACAGCTATAATGAAAAACTGTTTTTT	CSATRDSYNEKLFF	ALPHA_380	BETA_2	ALPHA_380-BETA_2	1	1	1	1
039_G5_16_034_POST_CD3POS_C	1	POST	CD8	POST_CD8	210	1	124	0.99	TGTGCTTTCTTGAAAGGAGGAGGTGCTGACGGACTCACCTTT	CAFLKGGGADGLTF	TGTGCCAGCAGCACCTGGGACAGGGAAAAAAGGGAGACCCAGTACTTC	CASSTWDREKRETQYF	ALPHA_585	BETA_219	ALPHA_585-BETA_219	4	3	3	2
039_G5_16_034_PRE_CD3POS_B	0	PRE	CD4	PRE_CD4	28	1	200	0.95	TGCGGCACAGTGCCCTCAGGAACCTACAAATACATCTTT	CGTVPSGTYKYIF	TGTGCCAGCAGCCAAGAAGGGCCAGGGTATAACACTGAAGCTTTCTTT	CASSQEGPGYNTEAFF	ALPHA_48	BETA_226	ALPHA_48-BETA_226	1	1	1	1
039_G5_16_034_PRE_CD3POS_C	2	PRE	CD8	PRE_CD8	66	1			TGTGCAACGTATTCTGGGGGTTACCAGAAAGTTACCTTT	CATYSGGYQKVTF			ALPHA_53		ALPHA_53-NA	1			0
040_H5_16_034_PRE_CD3POS_B	2	PRE	CD8	PRE_CD8			68	1			TGCAGTGCTAGCCTCCGGGACCAGGGGCCCGGAGAGCAGTACTTC	CSASLRDQGPGEQYF		BETA_48	NA-BETA_48		1		0
041_A6_16_034_POST_CD3POS_B	1	POST	CD8	POST_CD8	110	1	64	0.98	TGTGCCTCCGATTCAGGATACAGCACCCTCACCTTT	CASDSGYSTLTF	TGTGCCTGGCGAAAGCGGGGGGCCCCCTACAATGAGCAGTTCTTC	CAWRKRGAPYNEQFF	ALPHA_264	BETA_699	ALPHA_264-BETA_699	2	2	2	2
042_B6_16_034_POST_CD3POS_A	2	POST	CD8	POST_CD8			82	1			TGTGCCAGCAGTTTGCAGGGGGGGAACTATGGCTACACCTTC	CASSLQGGNYGYTF		BETA_599	NA-BETA_599		1		0
043_C6_16_034_POST_CD3POS_B	1	POST	CD8	POST_CD8			28	1			TGTGCCAGCTCACCTTTTCCCAGTAAGTCGAATCAGCCCCAGCATTTT	CASSPFPSKSNQPQHF		BETA_637	NA-BETA_637		2		0
043_C6_16_034_POST_CD3POS_C	1	POST	CD8	POST_CD8	72	1			TGTGCTACGGACTTTTATTCAGGAGGAGGTGCTGACGGACTCACCTTT	CATDFYSGGGADGLTF			ALPHA_312		ALPHA_312-NA	1			0
043_C6_16_034_PRE_CD3POS_A	0	PRE	CD4	PRE_CD4			62	0.93			TGTGCCATCAGTGTAGACAGGGTAGGCCAGCCCCAGCATTTT	CAISVDRVGQPQHF		BETA_690	NA-BETA_690		1		0
044_D6_16_034_POST_CD3POS_B	1	POST	CD8	POST_CD8	117	1	46	1	TGTGCTGTGAGTGTCACCGGTAACCAGTTCTATTTT	CAVSVTGNQFYF	TGTGCCAGTACGGACTACAGAACACAAGAGACCCAGTACTTC	CASTDYRTQETQYF	ALPHA_486	BETA_649	ALPHA_486-BETA_649	8	9	7	2
045_E6_16_034_POST_CD3POS_A	1	POST	CD8	POST_CD8	76	1	26	1	TGTGCCGCAAGGGTGGATAGCAACTATCAGTTAATCTGG	CAARVDSNYQLIW	TGTGCCAGCAGTTTTATGAGCACCGGGAGGGAGGGCTACACCTTC	CASSFMSTGREGYTF	ALPHA_220	BETA_603	ALPHA_220-BETA_603	1	1	1	1
045_E6_16_034_POST_CD3POS_C	1	POST	CD8	POST_CD8	81	1	62	1	TGTGCTTTCTTGAAAGGAGGAGGTGCTGACGGACTCACCTTT	CAFLKGGGADGLTF	TGTGCCAGCAGCACCTGGGACAGGGAAAAAAGGGAGACCCAGTACTTC	CASSTWDREKRETQYF	ALPHA_585	BETA_219	ALPHA_585-BETA_219	4	3	3	2
046_F6_16_034_PRE_CD3POS_B	1	PRE	CD8	PRE_CD8	69	0.7	165	1	TGTGCTCTAAGTGGCAGAGGCTCAACCCTGGGGAGGCTATACTTT	CALSGRGSTLGRLYF	TGTGCCAGCAGTTTAAGTAACTATGGCTACACCTTC	CASSLSNYGYTF	ALPHA_322	BETA_580	ALPHA_322-BETA_580	3	3	3	2
047_G6_16_034_POST_CD3POS_A	1	POST	CD8	POST_CD8	56	1			TGTGCTACGGACCAGGCAGGAACTGCTCTGATCTTT	CATDQAGTALIF			ALPHA_301		ALPHA_301-NA	9			0
047_G6_16_034_PRE_CD3POS_A	1	PRE	CD8	PRE_CD8	106	1	214	1	TGCGGCAGCTTCAAAGCTGCAGGCAACAAGCTAACTTTT	CGSFKAAGNKLTF	TGTGCCAGCAGCTTAGAGGCCGGCTGGAACGAGCAGTACTTC	CASSLEAGWNEQYF	ALPHA_49	BETA_382	ALPHA_49-BETA_382	2	2	2	2
047_G6_16_034_PRE_CD3POS_C	1	PRE	CD8	PRE_CD8	18	1	29	1	TGTGCTGTGAGAGACGTGAGGGACACAGGCTTTCAGAAACTTGTATTT	CAVRDVRDTGFQKLVF	TGTGCCAGCAGCTTAATTGGACTAGATGAGCAGTTCTTC	CASSLIGLDEQFF	ALPHA_448	BETA_373	ALPHA_448-BETA_373	1	1	1	1
048_H6_16_034_POST_CD3POS_A	1	POST	CD8	POST_CD8	41	1	147	1	TGTGCCTTGGGACTGTGGGCTGGGAGTTACCAACTCACTTTC	CALGLWAGSYQLTF	TGTGCCAGCAGAGCCAGGGAGAACGAGACCCAGTACTTC	CASRARENETQYF	ALPHA_284	BETA_211	ALPHA_284-BETA_211	2	2	2	2
048_H6_16_034_POST_CD3POS_B	1	POST	CD8	POST_CD8	67	1	195	1	TGTGCCCCGAGGAATGCAGGCAACATGCTCACCTTT	CAPRNAGNMLTF	TGTGCCAGCAGCCTAACAGGGGGTGAAGCTTTCTTT	CASSLTGGEAFF	ALPHA_213	BETA_301	ALPHA_213-BETA_301	2	2	2	2
049_A7_16_034_POST_CD3POS_A	1	POST	CD8	POST_CD8			23	1			TGTGCCAGCAGCCACGCGGGACTCCCGGACCAAGAGACCCAGTACTTC	CASSHAGLPDQETQYF		BETA_246	NA-BETA_246		9		0
049_A7_16_034_POST_CD3POS_B	1	POST	CD8	POST_CD8	88	1	24	1	TGTGCCCCGAGGAATGCAGGCAACATGCTCACCTTT	CAPRNAGNMLTF	TGTGCCAGCAGCCTAACAGGGGGTGAAGCTTTCTTT	CASSLTGGEAFF	ALPHA_213	BETA_301	ALPHA_213-BETA_301	2	2	2	2
050_B7_16_034_POST_CD3POS_A	2	POST	CD8	POST_CD8	69	1	46	0.94	TGTGCCTCCCCCTTCTTCACGGGAGGAGGAAACAAACTCACCTTT	CASPFFTGGGNKLTF	TGCGCCAGCAGTTTAACAGGGCTTTCCGGAAACACCATATATTTT	CASSLTGLSGNTIYF	ALPHA_263	BETA_155	ALPHA_263-BETA_155	4	4	4	2
050_B7_16_034_POST_CD3POS_B	0	POST	CD4	POST_CD4	36	1	19	1	TGTGTGGTGATCCCCTCATTTCCCAACGACTACAAGCTCAGCTTT	CVVIPSFPNDYKLSF	TGTGCCAGTAGTGGCCTTGCAGAGATCAAATCTGGGGCCAACGTCCTGACTTTC	CASSGLAEIKSGANVLTF	ALPHA_625	BETA_672	ALPHA_625-BETA_672	1	1	1	1
050_B7_16_034_PRE_CD3POS_B	1	PRE	CD8	PRE_CD8	44	1	127	1	TGTGTGGTGAATTCTGGGGGTTACCAGAAAGTTACCTTT	CVVNSGGYQKVTF	TGCGCCAGCACGTGGACCGGGGAGCTGTTTTTT	CASTWTGELFF	ALPHA_611	BETA_84	ALPHA_611-BETA_84	2	2	2	2
051_C7_16_034_POST_CD3POS_A	1	POST	CD8	POST_CD8	60	1	107	1	TGTGCTACGGACCCGGCAGGAACTGCTCTGATCTTT	CATDPAGTALIF	TGTGCCAGCAGCTCGCCGGGACGAGAGACCCAGTACTTC	CASSSPGRETQYF	ALPHA_303	BETA_362	ALPHA_303-BETA_362	18	22	17	2
051_C7_16_034_POST_CD3POS_B	1	POST	CD8	POST_CD8	151	1	131	0.82	TGTGCTCTGATCCTTACCATGAATTCAGGATACAGCACCCTCACCTTT	CALILTMNSGYSTLTF	TGTGCCAGCAGCTTAATAGTCCACACTAAAGAGACCCAGTACTTC	CASSLIVHTKETQYF	ALPHA_371	BETA_372	ALPHA_371-BETA_372	10	13	8	2
051_C7_16_034_PRE_CD3POS_B	0	PRE	CD4	PRE_CD4	41	1			TGTGCAATGGAAACCAGTGGCTCTAGGTTGACCTTT	CAMETSGSRLTF			ALPHA_76		ALPHA_76-NA	1			0
052_D7_16_034_POST_CD3POS_C	0	POST	CD4	POST_CD4			124	1			TGTGCCAGCAGCTTAACGATGGCACCGAGCTCCTACAATGAGCAGTTCTTC	CASSLTMAPSSYNEQFF		BETA_369	NA-BETA_369		1		0
053_E7_16_034_POST_CD3POS_A	1	POST	CD8	POST_CD8	163	1	149	1	TGTGTTGTGAGTGAAAGAGGCTTTCAGAAACTTGTATTT	CVVSERGFQKLVF	TGTGCCAGCAGCCTCCGGGACGGCAATCAGCCCCAGCATTTT	CASSLRDGNQPQHF	ALPHA_634	BETA_307	ALPHA_634-BETA_307	1	1	1	1
053_E7_16_034_POST_CD3POS_B	1	POST	CD8	POST_CD8	37	1	51	1	TGTGCCTTGGGACTGTGGGCTGGGAGTTACCAACTCACTTTC	CALGLWAGSYQLTF	TGTGCCAGCAGAGCCAGGGAGAACGAGACCCAGTACTTC	CASRARENETQYF	ALPHA_284	BETA_211	ALPHA_284-BETA_211	2	2	2	2
053_E7_16_034_POST_CD3POS_C	1	POST	CD8	POST_CD8	459	1	40	1	TGCCTCGTGGGTGGAGCTGGCAACACAGGCAAACTAATCTTT	CLVGGAGNTGKLIF	TGTGCCAGCAGCTCCGTAGGTTCCTACGAGCAGTACTTC	CASSSVGSYEQYF	ALPHA_36	BETA_357	ALPHA_36-BETA_357	4	4	4	2
054_F7_16_034_POST_CD3POS_A	2	POST	CD8	POST_CD8	168	1	146	0.97	TGTGCTTCCGACACGGGCAGGAGAGCACTTACTTTT	CASDTGRRALTF	TGCAGTGCTAGAGGCCCAGAGACCCAGTACTTC	CSARGPETQYF	ALPHA_566	BETA_39	ALPHA_566-BETA_39	1	2	1	1
054_F7_16_034_POST_CD3POS_B	0	POST	CD4	POST_CD4	7	1	20	1	TGTGCTCTAAGTGGCAGAAGCCAAGGAAATCTCATCTTT	CALSGRSQGNLIF	TGTGCCAGCAGTTTCAACGGGATGAATCAGCCCCAGCATTTT	CASSFNGMNQPQHF	ALPHA_321	BETA_596	ALPHA_321-BETA_596	1	1	1	1
055_G7_16_034_POST_CD3POS_A	1	POST	CD8	POST_CD8			80	0.94			TGTGCCAGCACTTCTCCCTGGCGGGGGAGGGCGGAGACCCAGTACTTC	CASTSPWRGRAETQYF		BETA_198	NA-BETA_198		1		0
055_G7_16_034_POST_CD3POS_B	1	POST	CD8	POST_CD8	74	1	100	1	TGTGCTCTCCTTAAAGCTGCAGGCAACAAGCTAACTTTT	CALLKAAGNKLTF	TGTGCCAGCAGTTTAGAGTCGGGGGGGATAAGACGAGCCGGGGAGCTGTTTTTT	CASSLESGGIRRAGELFF	ALPHA_335	BETA_585	ALPHA_335-BETA_585	1	1	1	1
056_H7_16_034_POST_CD3POS_A	0	POST	CD4	POST_CD4			34	1			TGTGCCATCAGTGAGACCAGGAGGAAGGATGAAAAACTGTTTTTT	CAISETRRKDEKLFF		BETA_684	NA-BETA_684		1		0
056_H7_16_034_POST_CD3POS_B	0	POST	CD4	POST_CD4	53	0.96	152	1	TGTGCAGAGAGTATAAGGGACTACAAGCTCAGCTTT	CAESIRDYKLSF	TGTGCCAGCAGCCTAACGGCGGGTAATGAAAAACTGTTTTTT	CASSLTAGNEKLFF	ALPHA_103	BETA_302	ALPHA_103-BETA_302	1	1	1	1
056_H7_16_034_PRE_CD3POS_C	0	PRE	CD4	PRE_CD4	76	0.99	70	1	TGTGCTGGGCATCGAAGGGGATCAGGAGGAGGTGCTGACGGACTCACCTTT	CAGHRRGSGGGADGLTF	TGTGCCAGCGCCCAAACCCTCGGGGGGCGGTCTGGCTACACCTTC	CASAQTLGGRSGYTF	ALPHA_414	BETA_618	ALPHA_414-BETA_618	1	1	1	1
058_B8_16_034_POST_CD3POS_A	1	POST	CD8	POST_CD8	109	0.7	73	0.71	TGCCTCGTGGGTAACTCTGGCAACACAGGCAAACTAATCTTT	CLVGNSGNTGKLIF	TGTGCCAGCAGCAACCGCGGGAAGGGTGTAATGTATCGCTGGTCCTACAATGAGCAGTTCTTC	CASSNRGKGVMYRWSYNEQFF	ALPHA_29	BETA_214	ALPHA_29-BETA_214	1	1	1	1
059_C8_16_034_POST_CD3POS_A	1	POST	CD8	POST_CD8			80	1			TGTGCCAGCAGCTCGCCGGGACGAGAGACCCAGTACTTC	CASSSPGRETQYF		BETA_362	NA-BETA_362		22		0
059_C8_16_034_POST_CD3POS_B	1	POST	CD8	POST_CD8	107	1	175	0.91	TGTGCTTGCCTGAGAAGCCAAGGAAATCTCATCTTT	CACLRSQGNLIF	TGTGCCAGCAGCTCCCCCGGGACTAGCGGGGGGGCCGTCTACAATGAGCAGTTCTTC	CASSSPGTSGGAVYNEQFF	ALPHA_568	BETA_350	ALPHA_568-BETA_350	2	2	2	2
059_C8_16_034_PRE_CD3POS_A	0	PRE	CD4	PRE_CD4	31	0.89			TGTGCTGTGAGAGTCACGATGAATTATGGTGGTGCTACAAACAAGCTCATCTTT	CAVRVTMNYGGATNKLIF			ALPHA_461		ALPHA_461-NA	1			0
059_C8_16_034_PRE_CD3POS_C	1	PRE	CD8	PRE_CD8	54	1	20	1	TGTGCTTCAGCCCCTCCTGGGGCTGGGAGTTACCAACTCACTTTC	CASAPPGAGSYQLTF	TGTGCCAGCAGTTACCAACAGGGACGGTCCGAGTGGCGCACTGGGGCCAACGTCCTGACTTTC	CASSYQQGRSEWRTGANVLTF	ALPHA_565	BETA_541	ALPHA_565-BETA_541	4	4	4	2
061_E8_16_034_POST_CD3POS_A	0	POST	CD4	POST_CD4			37	1			TGTGCCAGCAGGGAAGGGCAGAACTATGGCTACACCTTC	CASREGQNYGYTF		BETA_459	NA-BETA_459		1		0
061_E8_16_034_POST_CD3POS_B	1	POST	CD8	POST_CD8	195	0.89	138	1	TGTGCTACGGACCCGGCAGGAACTGCTCTGATCTTT	CATDPAGTALIF	TGTGCCAGCAGCTCGCCGGGACGAGAGACCCAGTACTTC	CASSSPGRETQYF	ALPHA_303	BETA_362	ALPHA_303-BETA_362	18	22	17	2
061_E8_16_034_POST_CD3POS_C	1	POST	CD8	POST_CD8			212	1			TGTGCCAGCAGCTCGCCGGGACGAGAGACCCAGTACTTC	CASSSPGRETQYF		BETA_362	NA-BETA_362		22		0
061_E8_16_034_PRE_CD3POS_B	1	PRE	CD8	PRE_CD8			146	1			TGTGCCAGCAGCTCGCCGGGACGAGAGACCCAGTACTTC	CASSSPGRETQYF		BETA_362	NA-BETA_362		22		0
062_F8_16_034_POST_CD3POS_A	0	POST	CD4	POST_CD4			30	1			TGTGCCAGCACCCGACCAACAGGGGGGACTGAAGCTTTCTTT	CASTRPTGGTEAFF		BETA_190	NA-BETA_190		1		0
062_F8_16_034_POST_CD3POS_C	1	POST	CD8	POST_CD8	70	0.93	523	1	TGTGCTGTGAGTGTCACCGGTAACCAGTTCTATTTT	CAVSVTGNQFYF	TGTGCCAGTACGGACTACAGAACACAAGAGACCCAGTACTTC	CASTDYRTQETQYF	ALPHA_486	BETA_649	ALPHA_486-BETA_649	8	9	7	2
062_F8_16_034_PRE_CD3POS_A	0	PRE	CD4	PRE_CD4			34	1			TGTGCCAGCAGTGGAAGGGATCTTTACGAGCAGTACTTC	CASSGRDLYEQYF		BETA_530	NA-BETA_530		1		0
063_G8_16_034_POST_CD3POS_A	1	POST	CD8	POST_CD8	41	1	156	0.81	TGTGCTCTGATCCTTACCATGAATTCAGGATACAGCACCCTCACCTTT	CALILTMNSGYSTLTF	TGTGCCAGCAGCTTAATAGTCCACACTAAAGAGACCCAGTACTTC	CASSLIVHTKETQYF	ALPHA_371	BETA_372	ALPHA_371-BETA_372	10	13	8	2
063_G8_16_034_PRE_CD3POS_C	0	PRE	CD4	PRE_CD4			42	1			TGCAGTGCTAGAGATCTCTCGGGAGCGCAAGAGACCCAGTACTTC	CSARDLSGAQETQYF		BETA_33	NA-BETA_33		1		0
064_H8_16_034_PRE_CD3POS_A	0	PRE	CD4	PRE_CD4	106	1	171	0.96	TGTGCGCGGCTTATAACTCAGGGCGGATCTGAAAAGCTGGTCTTT	CARLITQGGSEKLVF	TGCAGTGCTGCCGATTACGATACGCAGTATTTT	CSAADYDTQYF	ALPHA_295	BETA_72	ALPHA_295-BETA_72	1	1	1	1
065_A9_16_034_POST_CD3POS_A	1	POST	CD8	POST_CD8			72	0.92			TGTGCCAGTACGGACTACAGAACACAAGAGACCCAGTACTTC	CASTDYRTQETQYF		BETA_649	NA-BETA_649		9		0
065_A9_16_034_POST_CD3POS_B	1	POST	CD8	POST_CD8	26	1	53	0.65	TGTGCTCTGATCCTTACCATGAATTCAGGATACAGCACCCTCACCTTT	CALILTMNSGYSTLTF	TGTGCCAGCAGCTTAATAGTCCACACTAAAGAGACCCAGTACTTC	CASSLIVHTKETQYF	ALPHA_371	BETA_372	ALPHA_371-BETA_372	10	13	8	2
065_A9_16_034_PRE_CD3POS_B	1	PRE	CD8	PRE_CD8	71	1	20	1	TGTGCTACGGACCCGGCAGGAACTGCTCTGATCTTT	CATDPAGTALIF	TGTGCCAGCAGCTCGCCGGGACGAGAGACCCAGTACTTC	CASSSPGRETQYF	ALPHA_303	BETA_362	ALPHA_303-BETA_362	18	22	17	2
065_A9_16_034_PRE_CD3POS_C	0	PRE	CD4	PRE_CD4			44	1			TGTGCCAGCAGTTACGGTTCTAGCGGGGTTGGGGAGCAGTACTTC	CASSYGSSGVGEQYF		BETA_550	NA-BETA_550		1		0
066_B9_16_034_POST_CD3POS_A	1	POST	CD8	POST_CD8	103	1	71	1	TGTGCTACGGACCCGGCAGGAACTGCTCTGATCTTT	CATDPAGTALIF	TGTGCCAGCAGCTCGCCGGGACGAGAGACCCAGTACTTC	CASSSPGRETQYF	ALPHA_303	BETA_362	ALPHA_303-BETA_362	18	22	17	2
066_B9_16_034_POST_CD3POS_B	0	POST	CD4	POST_CD4	50	1	27	1	TGTGCAGCAAGTAGGGAGGATAGCAACTATCAGTTAATCTGG	CAASREDSNYQLIW	TGTGCCAGCAGCTCATACGGAACCGACGGGACCAATCAGCCCCAGCATTTT	CASSSYGTDGTNQPQHF	ALPHA_150	BETA_347	ALPHA_150-BETA_347	1	1	1	1
067_C9_16_034_POST_CD3POS_A	2	POST	CD8	POST_CD8	30	1	24	1	TGTGCTCTGAGTAAATATTCAGGAGGAGGTGCTGACGGACTCACCTTT	CALSKYSGGGADGLTF	TGTGCCAGCAGCCCAACGTCTCAGGGGAGCAATCAGCCCCAGCATTTT	CASSPTSQGSNQPQHF	ALPHA_342	BETA_255	ALPHA_342-BETA_255	1	1	1	1
067_C9_16_034_PRE_CD3POS_B	0	PRE	CD4	PRE_CD4	52	1	82	1	TGTGCAGCCCCCGCCTCTTCTGGTTCTGCAAGGCAACTGACCTTT	CAAPASSGSARQLTF	TGTGCCAGCAGTGAGTCAGGGACCCAGTATTTT	CASSESGTQYF	ALPHA_168	BETA_521	ALPHA_168-BETA_521	1	1	1	1
068_D9_16_034_POST_CD3POS_A	1	POST	CD8	POST_CD8	19	1	28	1	TGTGCTACGGACCAGGCAGGAACTGCTCTGATCTTT	CATDQAGTALIF	TGTGCCAGCAGCCACGCGGGACTCCCGGACCAAGAGACCCAGTACTTC	CASSHAGLPDQETQYF	ALPHA_301	BETA_246	ALPHA_301-BETA_246	9	9	8	2
068_D9_16_034_POST_CD3POS_B	1	POST	CD8	POST_CD8	22	0.96	145	1	TGTGCTGTGGGTGCCCCGATAGGCTTTGGGAATGTGCTGCATTGC	CAVGAPIGFGNVLHC	TGCAGTGCTAGAGGCAAGTCTGGGGGCAGGAGGTACGAGCAGTACTTC	CSARGKSGGRRYEQYF	ALPHA_528	BETA_38	ALPHA_528-BETA_38	1	1	1	1
069_E9_16_034_POST_CD3POS_A	1	POST	CD8	POST_CD8	33	1	37	1	TGTGCTTCAGCCCCTCCTGGGGCTGGGAGTTACCAACTCACTTTC	CASAPPGAGSYQLTF	TGTGCCAGCAGTTACCAACAGGGACGGTCCGAGTGGCGCACTGGGGCCAACGTCCTGACTTTC	CASSYQQGRSEWRTGANVLTF	ALPHA_565	BETA_541	ALPHA_565-BETA_541	4	4	4	2
069_E9_16_034_POST_CD3POS_C	1	POST	CD8	POST_CD8	83	1	83	0.97	TGTGCTCTGAGCAATGGTCAGAATTTTGTCTTT	CALSNGQNFVF	TGCGCCTCAGCGGGAGGGCTCCCGACCCAGTACTTC	CASAGGLPTQYF	ALPHA_339	BETA_161	ALPHA_339-BETA_161	1	1	1	1
069_E9_16_034_PRE_CD3POS_C	0	PRE	CD4	PRE_CD4	81	1	122	1	TGTGCTTTCTATATGAACAGAGATGACAAGATCATCTTT	CAFYMNRDDKIIF	TGCGCCAGCAGCTTCTCTGACAACTACAATGAGCAGTTCTTC	CASSFSDNYNEQFF	ALPHA_584	BETA_134	ALPHA_584-BETA_134	1	1	1	1
070_F9_16_034_POST_CD3POS_B	2	POST	CD8	POST_CD8			87	1			TGTGCCAGCAGCTCCTCTATCTACGAGCAGTACTTC	CASSSSIYEQYF		BETA_359	NA-BETA_359		3		0
070_F9_16_034_POST_CD3POS_C	1	POST	CD8	POST_CD8	88	1	202	1	TGTGCTACGGACCCTGCAGGAACTGCTCTGATCTTT	CATDPAGTALIF	TGTGCCAGCAGCCCGCGGCAAGAGACCCAGTACTTC	CASSPRQETQYF	ALPHA_304	BETA_279	ALPHA_304-BETA_279	2	2	2	2
070_F9_16_034_PRE_CD3POS_B	0	PRE	CD4	PRE_CD4			43	1			TGTGCCAGCTCACCATGGGAAACTAGCACAGATACGCAGTATTTT	CASSPWETSTDTQYF		BETA_630	NA-BETA_630		1		0
071_G9_16_034_POST_CD3POS_A	1	POST	CD8	POST_CD8	160	1	269	0.83	TGTGCTCTGATCCTTACCATGAATTCAGGATACAGCACCCTCACCTTT	CALILTMNSGYSTLTF	TGTGCCAGCAGCTTAATAGTCCACACTAAAGAGACCCAGTACTTC	CASSLIVHTKETQYF	ALPHA_371	BETA_372	ALPHA_371-BETA_372	10	13	8	2
071_G9_16_034_POST_CD3POS_B	1	POST	CD8	POST_CD8	14	1	150	1	TGTGCTGTGAGTGTCACCGGTAACCAGTTCTATTTT	CAVSVTGNQFYF	TGTGCCAGTACGGACTACAGAACACAAGAGACCCAGTACTTC	CASTDYRTQETQYF	ALPHA_486	BETA_649	ALPHA_486-BETA_649	8	9	7	2
071_G9_16_034_PRE_CD3POS_B	1	PRE	CD8	PRE_CD8	101	1			TGTGCTTTCTTGAAAGGAGGAGGTGCTGACGGACTCACCTTT	CAFLKGGGADGLTF			ALPHA_585		ALPHA_585-NA	4			0
072_H9_16_034_POST_CD3POS_B	1	POST	CD8	POST_CD8	59	0.98	40	0.93	TGTGCTACGGACCCGGCAGGAACTGCTCTGATCTTT	CATDPAGTALIF	TGTGCCAGCAGCTCGCCGGGACGAGAGACCCAGTACTTC	CASSSPGRETQYF	ALPHA_303	BETA_362	ALPHA_303-BETA_362	18	22	17	2
072_H9_16_034_POST_CD3POS_C	0	POST	CD4	POST_CD4	340	1	39	1	TGTGCTGTGGGGGGTTATAACCAGGGAGGAAAGCTTATCTTC	CAVGGYNQGGKLIF	TGCGCCAGCAGCTTGGAGGACAGGGGGCGGTCACCCCTCCACTTT	CASSLEDRGRSPLHF	ALPHA_521	BETA_140	ALPHA_521-BETA_140	1	1	1	1
073_A10_16_034_POST_CD3POS_A	0	POST	CD4	POST_CD4			23	1			TGCAGTGCTTGGCGGGGGGAGGGAAGCAGCAATCAGCCCCAGCATTTT	CSAWRGEGSSNQPQHF		BETA_76	NA-BETA_76		1		0
073_A10_16_034_POST_CD3POS_B	1	POST	CD8	POST_CD8	14	1	33	1	TGTGCTTCAGCCCCTCCTGGGGCTGGGAGTTACCAACTCACTTTC	CASAPPGAGSYQLTF	TGTGCCAGCAGTTACCAACAGGGACGGTCCGAGTGGCGCACTGGGGCCAACGTCCTGACTTTC	CASSYQQGRSEWRTGANVLTF	ALPHA_565	BETA_541	ALPHA_565-BETA_541	4	4	4	2
073_A10_16_034_PRE_CD3POS_C	1	PRE	CD8	PRE_CD8	132	0.97	62	1	TGTGCTTCAGCCCCTCCTGGGGCTGGGAGTTACCAACTCACTTTC	CASAPPGAGSYQLTF	TGTGCCAGCAGTTACCAACAGGGACGGTCCGAGTGGCGCACTGGGGCCAACGTCCTGACTTTC	CASSYQQGRSEWRTGANVLTF	ALPHA_565	BETA_541	ALPHA_565-BETA_541	4	4	4	2
074_B10_16_034_POST_CD3POS_B	1	POST	CD8	POST_CD8	84	1	68	1	TGCCTCGTGGGTGGAGCTGGCAACACAGGCAAACTAATCTTT	CLVGGAGNTGKLIF	TGTGCCAGCAGCTCCGTAGGTTCCTACGAGCAGTACTTC	CASSSVGSYEQYF	ALPHA_36	BETA_357	ALPHA_36-BETA_357	4	4	4	2
074_B10_16_034_PRE_CD3POS_A	1	PRE	CD8	PRE_CD8	52	1	102	0.93	TGTGCTACGGACCCGGCAGGAACTGCTCTGATCTTT	CATDPAGTALIF	TGTGCCAGCAGCTCGCCGGGACGAGAGACCCAGTACTTC	CASSSPGRETQYF	ALPHA_303	BETA_362	ALPHA_303-BETA_362	18	22	17	2
074_B10_16_034_PRE_CD3POS_B	0	PRE	CD4	PRE_CD4	46	1	80	0.95	TGTGCTGTGGGTGCAGGAGGAAATGAGAAATTAACCTTT	CAVGAGGNEKLTF	TGCAGTGCCAGAAGGGACTGGAACTACAATGAGCAGTTCTTC	CSARRDWNYNEQFF	ALPHA_526	BETA_16	ALPHA_526-BETA_16	1	1	1	1
075_C10_16_034_POST_CD3POS_B	1	POST	CD8	POST_CD8	44	0.68	19	0.95	TGTGCTCTAAGTGGCAGAGGCTCAACCCTGGGGAGGCTATACTTT	CALSGRGSTLGRLYF	TGTGCCAGCAGTTTAAGTAACTATGGCTACACCTTC	CASSLSNYGYTF	ALPHA_322	BETA_580	ALPHA_322-BETA_580	3	3	3	2
075_C10_16_034_PRE_CD3POS_A	1	PRE	CD8	PRE_CD8	92	1	81	1	TGTGCTACGGACCAGGCAGGAACTGCTCTGATCTTT	CATDQAGTALIF	TGTGCCAGCAGCCACGCGGGACTCCCGGACCAAGAGACCCAGTACTTC	CASSHAGLPDQETQYF	ALPHA_301	BETA_246	ALPHA_301-BETA_246	9	9	8	2
076_D10_16_034_POST_CD3POS_A	0	POST	CD4	POST_CD4	83	0.94	92	1	TGTGCAGCAAGCAGTGACTACAAGCTCAGCTTT	CAASSDYKLSF	TGTGCCAGCAGTTCAGCCCTTAAGGGCGGCTACACCTTC	CASSSALKGGYTF	ALPHA_124	BETA_561	ALPHA_124-BETA_561	1	1	1	1
076_D10_16_034_POST_CD3POS_B	1	POST	CD8	POST_CD8	11	1	94	0.78	TGTGCTGTGAGTGTCACCGGTAACCAGTTCTATTTT	CAVSVTGNQFYF	TGTGCCAGTACGGACTACAGAACACAAGAGACCCAGTACTTC	CASTDYRTQETQYF	ALPHA_486	BETA_649	ALPHA_486-BETA_649	8	9	7	2
076_D10_16_034_POST_CD3POS_C	1	POST	CD8	POST_CD8	6	1	264	0.91	TGTGCTACGGACCCGGCAGGAACTGCTCTGATCTTT	CATDPAGTALIF	TGTGCCAGCAGCTTAATAGTCCACACTAAAGAGACCCAGTACTTC	CASSLIVHTKETQYF	ALPHA_303	BETA_372	ALPHA_303-BETA_372	18	13	1	1
076_D10_16_034_PRE_CD3POS_B	0	PRE	CD4	PRE_CD4	46	1			TGTGCCTGTGACACCGCGGGGGATGCTCTTAGCTCCTGGGACACCCGACAGATGTTTTTC	CACDTAGDALSSWDTRQMFF			ALPHA_270		ALPHA_270-NA	1			0
076_D10_16_034_PRE_CD3POS_C	1	PRE	CD8	PRE_CD8	234	1	156	1	TGTGCTACGGACCAGGCAGGAACTGCTCTGATCTTT	CATDQAGTALIF	TGTGCCAGCAGCCACGCGGGACTCCCGGACCAAGAGACCCAGTACTTC	CASSHAGLPDQETQYF	ALPHA_301	BETA_246	ALPHA_301-BETA_246	9	9	8	2
077_E10_16_034_POST_CD3POS_A	0	POST	CD4	POST_CD4	80	1	29	0.94	TGTGCTGTGGGTGCGGGAGGAGGAAACAAACTCACCTTT	CAVGAGGGNKLTF	TGCAGTGCTATGAGGACGCAGACTCCCGTGACTTTCTTT	CSAMRTQTPVTFF	ALPHA_530	BETA_59	ALPHA_530-BETA_59	1	1	1	1
077_E10_16_034_POST_CD3POS_B	0	POST	CD4	POST_CD4			27	1			TGTGCCAGCAGCTTGGCCCATGGTGGCTACACCTTC	CASSLAHGGYTF		BETA_432	NA-BETA_432		1		0
077_E10_16_034_POST_CD3POS_C	0	POST	CD4	POST_CD4	108	1			TGTGCCTTTCCGGATAGCAACTATCAGTTAATCTGG	CAFPDSNYQLIW			ALPHA_291		ALPHA_291-NA	1			0
078_F10_16_034_POST_CD3POS_A	1	POST	CD8	POST_CD8			169	0.82			TGTGCCAGCAGCTTAATAGTCCACACTAAAGAGACCCAGTACTTC	CASSLIVHTKETQYF		BETA_372	NA-BETA_372		13		0
078_F10_16_034_POST_CD3POS_C	0	POST	CD4	POST_CD4			108	1			TGTGCCAGCGGGAGGACAGGGAGCTTGGCCGGGGCCAACGTCCTGACTTTC	CASGRTGSLAGANVLTF		BETA_622	NA-BETA_622		1		0
078_F10_16_034_PRE_CD3POS_C	0	PRE	CD4	PRE_CD4	22	0.96	104	1	TGTGCCGTGAGGTCTGGTTCTGCAAGGCAACTGACCTTT	CAVRSGSARQLTF	TGCAGTGCTAGACAACAAGAGACCCAGTACTTC	CSARQQETQYF	ALPHA_245	BETA_28	ALPHA_245-BETA_28	1	1	1	1
079_G10_16_034_POST_CD3POS_B	1	POST	CD8	POST_CD8	74	1	92	1	TGTGCTGTGAGTGTCACCGGTAACCAGTTCTATTTT	CAVSVTGNQFYF	TGTGCCAGTACGGACTACAGAACACAAGAGACCCAGTACTTC	CASTDYRTQETQYF	ALPHA_486	BETA_649	ALPHA_486-BETA_649	8	9	7	2
080_H10_16_034_POST_CD3POS_A	0	POST	CD4	POST_CD4	655	0.88			TGTGCAGCAAGTAAGAAGACTGGAGGCTTCAAAACTATCTTT	CAASKKTGGFKTIF			ALPHA_148		ALPHA_148-NA	1			0
080_H10_16_034_POST_CD3POS_B	1	POST	CD8	POST_CD8	65	1	26	1	TGTGCTTTCTTGAAAGGAGGAGGTGCTGACGGACTCACCTTT	CAFLKGGGADGLTF	TGTGCCAGCAGCACCTGGGACAGGGAAAAAAGGGAGACCCAGTACTTC	CASSTWDREKRETQYF	ALPHA_585	BETA_219	ALPHA_585-BETA_219	4	3	3	2
082_B11_16_034_PRE_CD3POS_A	0	PRE	CD4	PRE_CD4	2	1	45	1	TGTGTGGTGAGGTTTCCGGGCAGGAGAGCACTTACTTTT	CVVRFPGRRALTF	TGTGCCAGCAGCTTGGATACAGGACTGAACACTGAAGCTTTCTTT	CASSLDTGLNTEAFF	ALPHA_624	BETA_429	ALPHA_624-BETA_429	1	1	1	1
082_B11_16_034_PRE_CD3POS_B	2	PRE	CD8	PRE_CD8	68	1	22	0.96	TGCGCTGTGAGAGTTGATAGCAACTATCAGTTAATCTGG	CAVRVDSNYQLIW	TGTGCCAGCAGTAAGGCAGAGCGCTCCTATGGCTACACCTTC	CASSKAERSYGYTF	ALPHA_43	BETA_466	ALPHA_43-BETA_466	1	1	1	1
083_C11_16_034_POST_CD3POS_A	1	POST	CD8	POST_CD8			225	1			TGTGCCAGTACGGACTACAGAACACAAGAGACCCAGTACTTC	CASTDYRTQETQYF		BETA_649	NA-BETA_649		9		0
083_C11_16_034_POST_CD3POS_B	1	POST	CD8	POST_CD8			161	1			TGTGCCAGCAGCTCACTACAGGGGCTCCTCTCCTACGAGCAGTACTTC	CASSSLQGLLSYEQYF		BETA_345	NA-BETA_345		3		0
083_C11_16_034_PRE_CD3POS_B	0	PRE	CD4	PRE_CD4	56	0.95	128	1	TGTGCAGGAGTCAATAATGCAGGCAACATGCTCACCTTT	CAGVNNAGNMLTF	TGTGCCAGCAGCGGATTAACCGGGACAGTGGCAGATACGCAGTATTTT	CASSGLTGTVADTQYF	ALPHA_186	BETA_328	ALPHA_186-BETA_328	1	1	1	1
084_D11_16_034_POST_CD3POS_A	1	POST	CD8	POST_CD8	88	0.99	50	0.66	TGTGCTACGGACCCGGCAGGAACTGCTCTGATCTTT	CATDPAGTALIF	TGTGCCAGCAGCTCGCCGGGACGAGAGACCCAGTACTTC	CASSSPGRETQYF	ALPHA_303	BETA_362	ALPHA_303-BETA_362	18	22	17	2
084_D11_16_034_POST_CD3POS_B	0	POST	CD4	POST_CD4	98	0.66	243	1	TGTGCTGTGAGAGGGCGCGAAACGGGAGGTAGCAACTATAAACTGACATTT	CAVRGRETGGSNYKLTF	TGTGCCAGCAGCTTATCCGCCTTAGAAAGGGAGCAGTACTTC	CASSLSALEREQYF	ALPHA_460	BETA_408	ALPHA_460-BETA_408	1	1	1	1
085_E11_16_034_POST_CD3POS_A	0	POST	CD4	POST_CD4	50	1	107	1	TGTGCAGGGAATTCTGGGGGTTACCAGAAAGTTACCTTT	CAGNSGGYQKVTF	TGTGCCAGCAGTTACCTCCAGCACACTGAAGCTTTCTTT	CASSYLQHTEAFF	ALPHA_193	BETA_546	ALPHA_193-BETA_546	1	1	1	1
085_E11_16_034_POST_CD3POS_C	1	POST	CD8	POST_CD8	57	1	119	1	TGTGCTACGGACCCGGCAGGAACTGCTCTGATCTTT	CATDPAGTALIF	TGTGCCAGCAGCTCGCCGGGACGAGAGACCCAGTACTTC	CASSSPGRETQYF	ALPHA_303	BETA_362	ALPHA_303-BETA_362	18	22	17	2
085_E11_16_034_PRE_CD3POS_B	0	PRE	CD4	PRE_CD4	64	1	106	1	TGTGCAGCAAGCGTGGGGGGAGGAAAGCTTATCTTC	CAASVGGGKLIF	TGTGCCAGCAGTTTAGCGGAGAACTCCTACGAGCAGTACTTC	CASSLAENSYEQYF	ALPHA_140	BETA_587	ALPHA_140-BETA_587	1	1	1	1
085_E11_16_034_PRE_CD3POS_C	1	PRE	CD8	PRE_CD8	36	1			TGTGCAGCCTCTTTTCAGGGCGGATCTGAAAAGCTGGTCTTT	CAASFQGGSEKLVF			ALPHA_174		ALPHA_174-NA	1			0
086_F11_16_034_POST_CD3POS_A	2	POST	CD8	POST_CD8	17	1			TGTGCTCTGAGCCTTACGATAGGCTTTGGGAATGTGCTGCATTGC	CALSLTIGFGNVLHC			ALPHA_340		ALPHA_340-NA	1			0
086_F11_16_034_POST_CD3POS_B	0	POST	CD4	POST_CD4	71	1	109	1	TGTGCCGATCTGGATAGCAACTATCAGTTAATCTGG	CADLDSNYQLIW	TGTGCCAGTAGTATCGGTCTACAAGGTGGCTACACCTTC	CASSIGLQGGYTF	ALPHA_219	BETA_664	ALPHA_219-BETA_664	1	1	1	1
086_F11_16_034_POST_CD3POS_C	1	POST	CD8	POST_CD8			230	0.86			TGTGCCAGCAGCTTAATAGTCCACACTAAAGAGACCCAGTACTTC	CASSLIVHTKETQYF		BETA_372	NA-BETA_372		13		0
086_F11_16_034_PRE_CD3POS_A	1	PRE	CD8	PRE_CD8	136	1	162	0.5	TGTGCTCTGATCCTTACCATGAATTCAGGATACAGCACCCTCACCTTT	CALILTMNSGYSTLTF	TGTGCCAGCTCACCGTCCGGGACAGGGCCGGCCGGGGAGCTGTTTTTT	CASSPSGTGPAGELFF	ALPHA_371	BETA_635	ALPHA_371-BETA_635	10	2	2	2
087_G11_16_034_POST_CD3POS_B	2	POST	CD8	POST_CD8	46	1	113	1	TGTGCAGAGAGTTTCCCAAATAATGCAGGCAACATGCTCACCTTT	CAESFPNNAGNMLTF	TGTGCCAGTAGCCAGCCCACGGCAGCTGAGCAGTTCTTC	CASSQPTAAEQFF	ALPHA_107	BETA_651	ALPHA_107-BETA_651	1	1	1	1
087_G11_16_034_POST_CD3POS_C	0	POST	CD4	POST_CD4	112	1			TGTGCCTGTGACCTCCTTCCTACTATTGGGGGATACTCCTCGTACACCGATAAACTCATCTTT	CACDLLPTIGGYSSYTDKLIF			ALPHA_280		ALPHA_280-NA	1			0
087_G11_16_034_PRE_CD3POS_C	0	PRE	CD4	PRE_CD4			115	1			TGTGCCAGCAGCCATTCTTGGGATGAAAAACTGTTTTTT	CASSHSWDEKLFF		BETA_254	NA-BETA_254		1		0
090_B12_16_034_POST_CD3POS_B	1	POST	CD8	POST_CD8	129	1	70	0.99	TGTGCTACGGACCAGGCAGGAACTGCTCTGATCTTT	CATDQAGTALIF	TGTGCCAGCAGCCACGCGGGACTCCCGGACCAAGAGACCCAGTACTTC	CASSHAGLPDQETQYF	ALPHA_301	BETA_246	ALPHA_301-BETA_246	9	9	8	2
090_B12_16_034_POST_CD3POS_C	0	POST	CD4	POST_CD4	110	1			TGTGCTCTTGGGGAAGGGCCCTTCCTCTCTTCGAAGGGGATACTTGGTCCCGATAAACTCATCTTT	CALGEGPFLSSKGILGPDKLIF			ALPHA_389		ALPHA_389-NA	1			0
091_C12_16_034_POST_CD3POS_A	0	POST	CD4	POST_CD4			84	1			TGTGCCAGCAGAAGCTTCCTGTTTCCAGGACAGGGAGAGACCCAGTACTTC	CASRSFLFPGQGETQYF		BETA_203	NA-BETA_203		1		0
091_C12_16_034_POST_CD3POS_C	1	POST	CD8	POST_CD8	127	1	285	1	TGTGCTACGGACCCGGCAGGAACTGCTCTGATCTTT	CATDPAGTALIF	TGTGCCAGCAGCTCGCCGGGACGAGAGACCCAGTACTTC	CASSSPGRETQYF	ALPHA_303	BETA_362	ALPHA_303-BETA_362	18	22	17	2
091_C12_16_034_PRE_CD3POS_C	0	PRE	CD4	PRE_CD4	25	1	40	1	TGTGCCCAAGGTCTCACTGGTTCTGCAAGGCAACTGACCTTT	CAQGLTGSARQLTF	TGTGCCAGCAGAAGACTAGCGGGGGGGCCTGACACCGGGGAGCTGTTTTTT	CASRRLAGGPDTGELFF	ALPHA_210	BETA_202	ALPHA_210-BETA_202	1	1	1	1
092_D12_16_034_POST_CD3POS_A	2	POST	CD8	POST_CD8	68	1	51	1	TGTGCCTCCCCCTTCTTCACGGGAGGAGGAAACAAACTCACCTTT	CASPFFTGGGNKLTF	TGCGCCAGCAGTTTAACAGGGCTTTCCGGAAACACCATATATTTT	CASSLTGLSGNTIYF	ALPHA_263	BETA_155	ALPHA_263-BETA_155	4	4	4	2
093_E12_16_034_POST_CD3POS_A	0	POST	CD4	POST_CD4	56	0.95	79	1	TGTGCTGTGAAAGAGGGCGGATCTGAAAAGCTGGTCTTT	CAVKEGGSEKLVF	TGTGCCAGCAGCTTTCTTGGACAGGGGTTAGATACGCAGTATTTT	CASSFLGQGLDTQYF	ALPHA_436	BETA_448	ALPHA_436-BETA_448	1	1	1	1
093_E12_16_034_POST_CD3POS_B	2	POST	CD8	POST_CD8	23	1	14	0.93	TGTGCTTATAGGAGAAGTAGGGGTGGTACTAGCTATGGAAAGCTGACATTT	CAYRRSRGGTSYGKLTF	TGTGCCAGTAGTATAGATCTATACCTCCGTACTGGGTTCTCAGTTAGGCAGCCCCAGCATTTT	CASSIDLYLRTGFSVRQPQHF	ALPHA_548	BETA_662	ALPHA_548-BETA_662	1	1	1	1
093_E12_16_034_POST_CD3POS_C	1	POST	CD8	POST_CD8	61	1	62	1	TGTGCTACGGACCCGGCAGGAACTGCTCTGATCTTT	CATDPAGTALIF	TGTGCCAGCAGCTCGCCGGGACGAGAGACCCAGTACTTC	CASSSPGRETQYF	ALPHA_303	BETA_362	ALPHA_303-BETA_362	18	22	17	2
093_E12_16_034_PRE_CD3POS_B	0	PRE	CD4	PRE_CD4	57	1			TGTGCAGCAAGCGTAGACACCGGTAACCAGTTCTATTTT	CAASVDTGNQFYF			ALPHA_139		ALPHA_139-NA	1			0
094_F12_16_034_POST_CD3POS_A	1	POST	CD8	POST_CD8	37	1	85	1	TGTGCTACGGACCAGGCAGGAACTGCTCTGATCTTT	CATDQAGTALIF	TGTGCCAGCAGCCACGCGGGACTCCCGGACCAAGAGACCCAGTACTTC	CASSHAGLPDQETQYF	ALPHA_301	BETA_246	ALPHA_301-BETA_246	9	9	8	2
094_F12_16_034_POST_CD3POS_B	0	POST	CD4	POST_CD4	135	1			TGTGCAGCACGCATCCAAACTGGGGCAAACAACCTCTTCTTT	CAARIQTGANNLFF			ALPHA_157		ALPHA_157-NA	1			0
094_F12_16_034_PRE_CD3POS_C	1	PRE	CD8	PRE_CD8	119	0.99	127	1	TGTGCTACGGACCCGGCAGGAACTGCTCTGATCTTT	CATDPAGTALIF	TGTGCCAGCAGCTCGCCGGGACGAGAGACCCAGTACTTC	CASSSPGRETQYF	ALPHA_303	BETA_362	ALPHA_303-BETA_362	18	22	17	2
095_G12_16_034_POST_CD3POS_A	2	POST	CD8	POST_CD8	36	1	37	0.95	TGCACCCTCCGGGGAGCTGGTGGTACTAGCTATGGAAAGCTGACATTT	CTLRGAGGTSYGKLTF	TGTGCCAGCAGTTTGCAGGGTGCAAACTACGAGCAGTACTTC	CASSLQGANYEQYF	ALPHA_1	BETA_600	ALPHA_1-BETA_600	2	2	2	2
095_G12_16_034_POST_CD3POS_C	1	POST	CD8	POST_CD8	143	1	608	1	TGTGTGGTGAATTCTGGGGGTTACCAGAAAGTTACCTTT	CVVNSGGYQKVTF	TGCGCCAGCACGTGGACCGGGGAGCTGTTTTTT	CASTWTGELFF	ALPHA_611	BETA_84	ALPHA_611-BETA_84	2	2	2	2
095_G12_16_034_PRE_CD3POS_A	0	PRE	CD4	PRE_CD4			71	1			TGTGCCTGGAGTTTGGGACAGGTGAACACTGAAGCTTTCTTT	CAWSLGQVNTEAFF		BETA_698	NA-BETA_698		1		0
095_G12_16_034_PRE_CD3POS_C	0	PRE	CD4	PRE_CD4			155	0.82			TGTGCCAGCAGCTTAGGGACAGTTAGCAATCAGCCCCAGCATTTT	CASSLGTVSNQPQHF		BETA_399	NA-BETA_399		1		0
002_B1_16_035_POST_CD3POS_B	0	POST	CD4	POST_CD4	39	0.6	23	1	TGTGCTCTGAGTGAGAGCCGAGACTTTGGGAATGTGCTGCATTGC	CALSESRDFGNVLHC	TGTGCCAGCAGCCCCACCGGGGTTAACACTGAAGCTTTCTTT	CASSPTGVNTEAFF	ALPHA_351	BETA_263	ALPHA_351-BETA_263	1	1	1	1
004_D1_16_035_PRE_CD3POS_A	1	PRE	CD8	PRE_CD8	226	1	15	0.83	TGTGCTACGGACACGTCTTATAACACCGACAAGCTCATCTTT	CATDTSYNTDKLIF	TGTGCCAGCAGTTACTTTCGACAGGGTGGGATGGGTGAGCAGTTCTTC	CASSYFRQGGMGEQFF	ALPHA_300	BETA_559	ALPHA_300-BETA_559	1	1	1	1
005_E1_16_035_POST_CD3POS_A	2	POST	CD8	POST_CD8	16	1	340	1	TGTGCTGGGGGTTTTTCGATAGGATCTGAAAAGCTGGTCTTT	CAGGFSIGSEKLVF	TGTGCCAGCAGCTTAGCGAATCTAGCGGGGGAAAACTACGAGCAGTACGTC	CASSLANLAGENYEQYV	ALPHA_422	BETA_390	ALPHA_422-BETA_390	1	1	1	1
006_F1_16_035_POST_CD3POS_B	0	POST	CD4	POST_CD4	248	1	111	0.99	TGTGCTCTCCCGAACAAGGTGATATTT	CALPNKVIF	TGCAGTGCTAGATCCGGGACAGGGTATGGCTACACCTTC	CSARSGTGYGYTF	ALPHA_333	BETA_45	ALPHA_333-BETA_45	1	1	1	1
007_G1_16_035_PRE_CD3POS_A	1	PRE	CD8	PRE_CD8	30	1	111	1	TGTGCTCTTGGGGCCGACACAGGCTTTCAGAAACTTGTATTT	CALGADTGFQKLVF	TGTGCCAGCCGGGACAGGGAAAACACCATATATTTT	CASRDRENTIYF	ALPHA_392	BETA_614	ALPHA_392-BETA_614	3	3	3	2
008_H1_16_035_PRE_CD3POS_A	1	PRE	CD8	PRE_CD8	57	1	158	1	TGTGCTCTTGACCGAGCCTACTGGGGGATAGGGTATCACACCGATAAACTCATCTTT	CALDRAYWGIGYHTDKLIF	TGCGCCAGCAGCTTGGCCAGGACAGACAGCTACGAGCAGTACTTC	CASSLARTDSYEQYF	ALPHA_376	BETA_142	ALPHA_376-BETA_142	1	1	1	1
008_H1_16_035_PRE_CD3POS_C	2	PRE	CD8	PRE_CD8	43	1	165	1	TGTGCAGCAAGGCTAGGATATGGAGGAAGCCAAGGAAATCTCATCTTT	CAARLGYGGSQGNLIF	TGTGCCAGCAGTTTAGGAGGAGTGGGAGATCAGCCCCAGCATTTT	CASSLGGVGDQPQHF	ALPHA_144	BETA_589	ALPHA_144-BETA_589	1	1	1	1
010_B2_16_035_POST_CD3POS_A	0	POST	CD4	POST_CD4			32	1			TGTGCCATCGCTAGCGGGGGGGTCTATGAGCAGTTCTTC	CAIASGGVYEQFF		BETA_692	NA-BETA_692		1		0
010_B2_16_035_POST_CD3POS_B	0	POST	CD4	POST_CD4			575	1			TGTGCCAGCAGCGACAGTCTAAGCTCCTACAATGAGCAGTTCTTC	CASSDSLSSYNEQFF		BETA_314	NA-BETA_314		2		0
010_B2_16_035_PRE_CD3POS_B	2	PRE	CD8	PRE_CD8	30	1	78	1	TGTGCTCTTGGGGAACCGGCCGGCACTGCCAGTAAACTCACCTTT	CALGEPAGTASKLTF	TGTGCCAGCTCCTCCGGCAGGGAGTCCACTGAAGCTTTCTTT	CASSSGRESTEAFF	ALPHA_382	BETA_643	ALPHA_382-BETA_643	1	1	1	1
011_C2_16_035_PRE_CD3POS_C	0	PRE	CD4	PRE_CD4	180	0.53			TGTGCAGACCCTAACAGACTCGCTTTT	CADPNRLAF			ALPHA_87		ALPHA_87-NA	1			0
012_D2_16_035_PRE_CD3POS_A	0	PRE	CD4	PRE_CD4	157	1	466	1	TGTGCTCTGAGTGTGGGAGGAAGCCAAGGAAATCTCATCTTT	CALSVGGSQGNLIF	TGTGCCAGCAGCCTACCTGGAGCAGCCAAAAACATTCAGTACTTC	CASSLPGAAKNIQYF	ALPHA_367	BETA_305	ALPHA_367-BETA_305	1	1	1	1
012_D2_16_035_PRE_CD3POS_B	0	PRE	CD4	PRE_CD4	14	1	421	1	TGTGCAGCAAGTAGGGGACTCACGGGAGGAGGAAACAAACTCACCTTT	CAASRGLTGGGNKLTF	TGTGCCACCCGGGAGGATCCGAACACCGGGGAGCTGTTTTTT	CATREDPNTGELFF	ALPHA_151	BETA_180	ALPHA_151-BETA_180	1	1	1	1
012_D2_16_035_PRE_CD3POS_C	2	PRE	CD8	PRE_CD8	83	0.97	192	1	TGTGCCGTTAATTCAGGATACAGCACCCTCACCTTT	CAVNSGYSTLTF	TGTGCCAGCAGCGATCTCCAACAGGGGTACTACGAGCAGTACTTC	CASSDLQQGYYEQYF	ALPHA_260	BETA_320	ALPHA_260-BETA_320	1	1	1	1
014_F2_16_035_POST_CD3POS_A	0	POST	CD4	POST_CD4	48	1	89	1	TGTGTTGTGAGTTTAGGGGGCCAGAAGCTGCTCTTT	CVVSLGGQKLLF	TGCAGTGCTCCCGGACAGGGCACAGATACGCAGTATTTT	CSAPGQGTDTQYF	ALPHA_642	BETA_63	ALPHA_642-BETA_63	1	1	1	1
014_F2_16_035_PRE_CD3POS_C	0	PRE	CD4	PRE_CD4			19	1			TGTGCCAGCACGACGGGGGGCCGGTTCGAGCAGTACGTC	CASTTGGRFEQYV		BETA_196	NA-BETA_196		1		0
015_G2_16_035_POST_CD3POS_A	0	POST	CD4	POST_CD4			220	1			TGTGCCAGCAGCTTAGCCTCCGGAGGGGTAAACACCATATATTTT	CASSLASGGVNTIYF		BETA_388	NA-BETA_388		1		0
015_G2_16_035_PRE_CD3POS_A	0	PRE	CD4	PRE_CD4	43	1			TGTGCTCTGAGTCTAGGATCTGGTTCTGCAAGGCAACTGACCTTT	CALSLGSGSARQLTF			ALPHA_345		ALPHA_345-NA	1			0
015_G2_16_035_PRE_CD3POS_B	0	PRE	CD4	PRE_CD4	84	1			TGTGCCTGTGACACTATGTACTCATCTTTCACCGATAAACTCATCTTT	CACDTMYSSFTDKLIF			ALPHA_278		ALPHA_278-NA	1			0
016_H2_16_035_POST_CD3POS_A	0	POST	CD4	POST_CD4	145	1	36	1	TGTGCTGCGGGTGGTACTAGCTATGGAAAGCTGACATTT	CAAGGTSYGKLTF	TGTGCCAGCAGCTCTCCTGGGAGGGAAGGCTACACCTTC	CASSSPGREGYTF	ALPHA_407	BETA_363	ALPHA_407-BETA_363	1	1	1	1
019_C3_16_035_PRE_CD3POS_A	0	PRE	CD4	PRE_CD4			79	1			TGTGCCAGCAGCGCGGGACAGGGGTTGAGAAATGAGCAGTTCTTC	CASSAGQGLRNEQFF		BETA_324	NA-BETA_324		1		0
020_D3_16_035_PRE_CD3POS_A	2	PRE	CD8	PRE_CD8			91	1			TGCAGTGCTAGGAGGTCGGACGCGGTCCAGCATTTT	CSARRSDAVQHF		BETA_52	NA-BETA_52		1		0
021_E3_16_035_POST_CD3POS_B	2	POST	CD8	POST_CD8	299	1	250	1	TGTGCTGTGAGTGATGAAACTGGGGCAAACAACCTCTTCTTT	CAVSDETGANNLFF	TGTGCCAGCAGTTTAAATCCGGAGAGCTCCTATAATTCACCCCTCCACTTT	CASSLNPESSYNSPLHF	ALPHA_480	BETA_577	ALPHA_480-BETA_577	1	1	1	1
021_E3_16_035_PRE_CD3POS_B	1	PRE	CD8	PRE_CD8	27	1	75	1	TGTGCTCTTGGGGCCGACACAGGCTTTCAGAAACTTGTATTT	CALGADTGFQKLVF	TGTGCCAGCCGGGACAGGGAAAACACCATATATTTT	CASRDRENTIYF	ALPHA_392	BETA_614	ALPHA_392-BETA_614	3	3	3	2
021_E3_16_035_PRE_CD3POS_C	0	PRE	CD4	PRE_CD4	156	1	79	1	TGTGCTGTGGGAACTTACAACTTCAACAAATTTTACTTT	CAVGTYNFNKFYF	TGTGCCAGCAGTTTAACAGCTGACCTCTATGGCTACACCTTC	CASSLTADLYGYTF	ALPHA_516	BETA_578	ALPHA_516-BETA_578	1	1	1	1
022_F3_16_035_POST_CD3POS_B	1	POST	CD8	POST_CD8	9	1	166	1	TGTGCAGGGCTGAGCAACACAGGCAAACTAATCTTT	CAGLSNTGKLIF	TGTGCCAGTTCCGGGAAGGGGTGGAATGAGCAGTTCTTC	CASSGKGWNEQFF	ALPHA_199	BETA_680	ALPHA_199-BETA_680	1	1	1	1
022_F3_16_035_PRE_CD3POS_A	1	PRE	CD8	PRE_CD8	46	1	134	0.98	TGCCTCGTGGGTGAGGGTACCGGCACTGCCAGTAAACTCACCTTT	CLVGEGTGTASKLTF	TGTGCCAGCAGCTTCGGGGGGACAGGGCGGACTGAAGCTTTCTTT	CASSFGGTGRTEAFF	ALPHA_34	BETA_419	ALPHA_34-BETA_419	1	1	1	1
022_F3_16_035_PRE_CD3POS_C	2	PRE	CD8	PRE_CD8	164	0.99	244	1	TGTGCCCTGGGGAGCAACTATCAGTTAATCTGG	CALGSNYQLIW	TGTGCCAGCAGCCAGGTCATGGGCGGGACACTTAACACTGAAGCTTTCTTT	CASSQVMGGTLNTEAFF	ALPHA_216	BETA_252	ALPHA_216-BETA_252	1	1	1	1
023_G3_16_035_POST_CD3POS_A	0	POST	CD4	POST_CD4	227	1	641	1	TGTGCTGTGAGAGGAGGGAAAGCAGGCAAATCAACCTTT	CAVRGGKAGKSTF	TGTGCCTGGAGCCTAGCTTCTTCCTACAATGAGCAGTTCTTC	CAWSLASSYNEQFF	ALPHA_459	BETA_695	ALPHA_459-BETA_695	1	1	1	1
023_G3_16_035_PRE_CD3POS_C	0	PRE	CD4	PRE_CD4	362	0.76	832	0.96	TGTGCAGCAGGCCGGTTTGATAATGCAGGCAACATGCTCACCTTT	CAAGRFDNAGNMLTF	TGTGCCAGCAGGGAGCCTGACGGAATTTCACCCCTCCACTTT	CASREPDGISPLHF	ALPHA_160	BETA_460	ALPHA_160-BETA_460	1	1	1	1
027_C4_16_035_PRE_CD3POS_C	2	PRE	CD8	PRE_CD8	21	0.91	154	1	TGTGCTGTGGGCCGTTATTCAGGATACAGCACCCTCACCTTT	CAVGRYSGYSTLTF	TGTGCCAGTAGGACCCCGGGGGGGCGTAACGGGGAGCTGTTTTTT	CASRTPGGRNGELFF	ALPHA_517	BETA_653	ALPHA_517-BETA_653	1	1	1	1
029_E4_16_035_POST_CD3POS_A	1	POST	CD8	POST_CD8	145	0.99	68	1	TGTGCTGTGATGGCCCCCGACTACAAGCTCAGCTTT	CAVMAPDYKLSF	TGCGCCAGCAGCTCTGAAGACAGTGGCTATGGCTACACCTTC	CASSSEDSGYGYTF	ALPHA_491	BETA_132	ALPHA_491-BETA_132	1	1	1	1
029_E4_16_035_PRE_CD3POS_B	2	PRE	CD8	PRE_CD8	78	0.55	154	0.99	TGTGCCTTTGGGGGGGATAGCAACTATCAGTTAATCTGG	CAFGGDSNYQLIW	TGTGCCAGCAGGCCAGCGGGGGGGGCGGAGACCCAGTACTTC	CASRPAGGAETQYF	ALPHA_294	BETA_458	ALPHA_294-BETA_458	1	1	1	1
030_F4_16_035_POST_CD3POS_B	0	POST	CD4	POST_CD4	95	1	38	0.95	TGTGCTGTGATCCCCATGGACACGGGCAGGAGAGCACTTACTTTT	CAVIPMDTGRRALTF	TGTGCCAGCAGCCCTGAAGGGGTGGAGACCCAGTACTTC	CASSPEGVETQYF	ALPHA_490	BETA_291	ALPHA_490-BETA_291	1	1	1	1
030_F4_16_035_PRE_CD3POS_B	1	PRE	CD8	PRE_CD8	136	1			TGTGCCTGTGACACCGGCTGGGGGATTAGCTCCTGGGACACCCGACAGATGTTTTTC	CACDTGWGISSWDTRQMFF			ALPHA_271		ALPHA_271-NA	1			0
030_F4_16_035_PRE_CD3POS_C	0	PRE	CD4	PRE_CD4			81	1			TGTGCCAGCAGTCTGACAGATTCACCCCTCCACTTT	CASSLTDSPLHF		BETA_496	NA-BETA_496		1		0
031_G4_16_035_POST_CD3POS_A	0	POST	CD4	POST_CD4	515	1	168	1	TGCATCGTCAGAGTCGCGTTTACCTACAGCAGTGCTTCCAAGATAATCTTT	CIVRVAFTYSSASKIIF	TGTGCCAGTACCCCGAAAGGGGGGGACACTGAAGCTTTCTTT	CASTPKGGDTEAFF	ALPHA_20	BETA_648	ALPHA_20-BETA_648	1	1	1	1
032_H4_16_035_POST_CD3POS_A	0	POST	CD4	POST_CD4	64	1			TGTGCAGCCCAGGGAGCCCAGAAGCTGGTATTT	CAAQGAQKLVF			ALPHA_166		ALPHA_166-NA	1			0
033_A5_16_035_PRE_CD3POS_C	2	PRE	CD8	PRE_CD8	100	1			TGTGCAGCAAGCCTCCTATCTAACTTTGGAAATGAGAAATTAACCTTT	CAASLLSNFGNEKLTF			ALPHA_128		ALPHA_128-NA	1			0
034_B5_16_035_PRE_CD3POS_C	2	PRE	CD8	PRE_CD8	75	0.54	179	1	TGTGTTGTGAGTGATCGCTGGAACACAGGCTTTCAGAAACTTGTATTT	CVVSDRWNTGFQKLVF	TGCGCCAGCAGCTCTGCCCGTTTGGACAAACCGATGAACACTGAAGCTTTCTTT	CASSSARLDKPMNTEAFF	ALPHA_640	BETA_133	ALPHA_640-BETA_133	2	3	2	2
037_E5_16_035_POST_CD3POS_A	2	POST	CD8	POST_CD8	74	1			TGTGTGGCCCCGGGCCCTATAGGCTTTGGGAATGTGCTGCATTGC	CVAPGPIGFGNVLHC			ALPHA_593		ALPHA_593-NA	2			0
038_F5_16_035_PRE_CD3POS_A	0	PRE	CD4	PRE_CD4			87	0.92			TGTGCCAGCAGCACCACCCCGACGGAATACTATGGCTACACCTTC	CASSTTPTEYYGYTF		BETA_216	NA-BETA_216		1		0
038_F5_16_035_PRE_CD3POS_B	0	PRE	CD4	PRE_CD4	34	1	139	1	TGTGCTGTGAGTGGGACTGGTGGCTACAATAAGCTGATTTTT	CAVSGTGGYNKLIF	TGTGCCAGCAGCCCAGAAGGCGGGACAGGGAAAGACGAGCAGTACTTC	CASSPEGGTGKDEQYF	ALPHA_484	BETA_259	ALPHA_484-BETA_259	1	1	1	1
039_G5_16_035_POST_CD3POS_A	0	POST	CD4	POST_CD4			874	1			TGTGCCAGCAGCTTAGAGGCCATGAACACTGAAGCTTTCTTT	CASSLEAMNTEAFF		BETA_381	NA-BETA_381		1		0
039_G5_16_035_PRE_CD3POS_A	0	PRE	CD4	PRE_CD4	37	1	146	1	TGTGCAGTCGATGGAGGAACCTACAAATACATCTTT	CAVDGGTYKYIF	TGCGCCAGCAGCTTGACGGGGGAGTCCTACAATGAGCAGTTCTTC	CASSLTGESYNEQFF	ALPHA_205	BETA_136	ALPHA_205-BETA_136	1	1	1	1
039_G5_16_035_PRE_CD3POS_C	0	PRE	CD4	PRE_CD4	10	1	346	1	TGTGCTGTGGAGGGGTCTAGCAACACAGGCAAACTAATCTTT	CAVEGSSNTGKLIF	TGTGCCAGCAGAATAGACCCACCAGATACGCAGTATTTT	CASRIDPPDTQYF	ALPHA_506	BETA_205	ALPHA_506-BETA_205	1	1	1	1
046_F6_16_035_POST_CD3POS_A	0	POST	CD4	POST_CD4	93	0.99	392	1	TGTGCAGAGAGCCCTAACCAGGCAGGAACTGCTCTGATCTTT	CAESPNQAGTALIF	TGTGCCAGCAGCTTCGGGACAACGGACACCGGGGAGCTGTTTTTT	CASSFGTTDTGELFF	ALPHA_101	BETA_417	ALPHA_101-BETA_417	1	1	1	1
046_F6_16_035_POST_CD3POS_B	2	POST	CD8	POST_CD8	203	1			TGTGCCTGTGACGCTTGGGGGGCTAGCTCCTGGGACACCCGACAGATGTTTTTC	CACDAWGASSWDTRQMFF			ALPHA_281		ALPHA_281-NA	1			0
046_F6_16_035_PRE_CD3POS_C	1	PRE	CD8	PRE_CD8	72	1	57	1	TGTGCTCTTGGGGCCGACACAGGCTTTCAGAAACTTGTATTT	CALGADTGFQKLVF	TGTGCCAGCCGGGACAGGGAAAACACCATATATTTT	CASRDRENTIYF	ALPHA_392	BETA_614	ALPHA_392-BETA_614	3	3	3	2
047_G6_16_035_PRE_CD3POS_A	0	PRE	CD4	PRE_CD4			105	0.95			TGTGCCAGCAGCTTACGGGGACAGGGGGTCCTCTCTGGGGCCAACGTCCTGACTTTC	CASSLRGQGVLSGANVLTF		BETA_378	NA-BETA_378		1		0
047_G6_16_035_PRE_CD3POS_B	0	PRE	CD4	PRE_CD4	21	1	254	1	TGTGCAGCTTTCTTTAATGCTGGCAACAACCGTAAGCTGATTTGG	CAAFFNAGNNRKLIW	TGCAGTGCTGGAAGGAGGGCCAAAGATACGCAGTATTTT	CSAGRRAKDTQYF	ALPHA_179	BETA_73	ALPHA_179-BETA_73	1	1	1	1
047_G6_16_035_PRE_CD3POS_C	1	PRE	CD8	PRE_CD8	221	1	428	1	TGCATCCTGCAATTCTTTGGAAATGAGAAATTAACCTTT	CILQFFGNEKLTF	TGTGCCAGCAGCTTTACAATCGGGGGGCCCATTCAGATCATTCAGTACTTC	CASSFTIGGPIQIIQYF	ALPHA_12	BETA_444	ALPHA_12-BETA_444	1	1	1	1
048_H6_16_035_POST_CD3POS_A	0	POST	CD4	POST_CD4	31	1			TGTGCCTGTGACACCGTAGTCGCTCTGGGGGATACGCAGGGTTTGACAGCACAACTCTTCTTT	CACDTVVALGDTQGLTAQLFF			ALPHA_272		ALPHA_272-NA	1			0
048_H6_16_035_PRE_CD3POS_B	1	PRE	CD8	PRE_CD8	77	0.52			TGCATCGTCAGAGTCGCGGAGAACAATGACATGCGCTTT	CIVRVAENNDMRF			ALPHA_18		ALPHA_18-NA	1			0
053_E7_16_035_POST_CD3POS_B	0	POST	CD4	POST_CD4			39	1			TGTGCCAGCAGCCCAAGGACAGTTGCTAATGAAAAACTGTTTTTT	CASSPRTVANEKLFF		BETA_256	NA-BETA_256		1		0
053_E7_16_035_PRE_CD3POS_A	1	PRE	CD8	PRE_CD8	39	1	157	1	TGTGCTGTGCGGTCATACAACTTCAACAAATTTTACTTT	CAVRSYNFNKFYF	TGCGCCAGCAGCTCTGCCCGTTTGGACAAACCGATGAACACTGAAGCTTTCTTT	CASSSARLDKPMNTEAFF	ALPHA_500	BETA_133	ALPHA_500-BETA_133	1	3	1	1
053_E7_16_035_PRE_CD3POS_B	0	PRE	CD4	PRE_CD4	44	1	14	0.82	TGTGCTGTGAGTGATCACTCCGTGGGAGGCGGATCTGAAAAGCTGGTCTTT	CAVSDHSVGGGSEKLVF	TGTGCCATCGGGTGGGGGGATCAGCCCCAGCATTTT	CAIGWGDQPQHF	ALPHA_478	BETA_693	ALPHA_478-BETA_693	1	1	1	1
054_F7_16_035_PRE_CD3POS_B	0	PRE	CD4	PRE_CD4	58	0.97	81	0.85	TGTGCACCTAGAAGTGGAAACAAACTGGTCTTT	CAPRSGNKLVF	TGTGCCAGCAGTTACTCGCCCGGGGGCTTGAACACTGAAGCTTTCTTT	CASSYSPGGLNTEAFF	ALPHA_84	BETA_555	ALPHA_84-BETA_555	1	1	1	1
057_A8_16_035_PRE_CD3POS_C	2	PRE	CD8	PRE_CD8			12	1			TGCGCCAGCAGCCAAACAAATATGGGCACTGAAGCTTTCTTT	CASSQTNMGTEAFF		BETA_90	NA-BETA_90		2		0
060_D8_16_035_PRE_CD3POS_A	2	PRE	CD8	PRE_CD8	144	0.84	66	1	TGTGTGGCCCCGGGCCCTATAGGCTTTGGGAATGTGCTGCATTGC	CVAPGPIGFGNVLHC	TGCGCCAGCAGCCAAACAAATATGGGCACTGAAGCTTTCTTT	CASSQTNMGTEAFF	ALPHA_593	BETA_90	ALPHA_593-BETA_90	2	2	1	1
062_F8_16_035_POST_CD3POS_A	0	POST	CD4	POST_CD4	136	1	183	1	TGTGCAGCCGCAAACCAGGGAGCCCAGAAGCTGGTATTT	CAAANQGAQKLVF	TGCAGTGCTCCGTCGGGTGCAGCTAGCAATCAGCCCCAGCATTTT	CSAPSGAASNQPQHF	ALPHA_172	BETA_66	ALPHA_172-BETA_66	1	1	1	1
062_F8_16_035_PRE_CD3POS_C	2	PRE	CD8	PRE_CD8	21	1	82	1	TGTGCTGTGAGTGATCCCGGCAGCAACTATCAGTTAATCTGG	CAVSDPGSNYQLIW	TGTGCCAGCAGTTTATCCCCAGAGACAGGGGTCCTAGACAATGAGCAGTTCTTC	CASSLSPETGVLDNEQFF	ALPHA_479	BETA_594	ALPHA_479-BETA_594	1	1	1	1
063_G8_16_035_POST_CD3POS_A	2	POST	CD8	POST_CD8	214	1	82	1	TGTGTTGTGAGTGATCGCTGGAACACAGGCTTTCAGAAACTTGTATTT	CVVSDRWNTGFQKLVF	TGCGCCAGCAGCTCTGCCCGTTTGGACAAACCGATGAACACTGAAGCTTTCTTT	CASSSARLDKPMNTEAFF	ALPHA_640	BETA_133	ALPHA_640-BETA_133	2	3	2	2
063_G8_16_035_PRE_CD3POS_A	2	PRE	CD8	PRE_CD8			11	1			TGCAGTGCTAGGTCCGGTGTTGGAAACACCATATATTTT	CSARSGVGNTIYF		BETA_55	NA-BETA_55		1		0
064_H8_16_035_POST_CD3POS_A	0	POST	CD4	POST_CD4	65	1	167	0.99	TGTGCCGTGGAACCCCAGAAGCTGGTATTT	CAVEPQKLVF	TGCAGTGCTCCCCCAGGCCCTGAAGCTTTCTTT	CSAPPGPEAFF	ALPHA_250	BETA_62	ALPHA_250-BETA_62	1	1	1	1
064_H8_16_035_PRE_CD3POS_B	1	PRE	CD8	PRE_CD8	144	1	37	1	TGTGCTCTGAGTAGGGATGCAGGCAACATGCTCACCTTT	CALSRDAGNMLTF	TGCAGCGTTAGTTTTTCAAATAATGAAAAACTGTTTTTT	CSVSFSNNEKLFF	ALPHA_343	BETA_10	ALPHA_343-BETA_10	1	1	1	1
064_H8_16_035_PRE_CD3POS_C	0	PRE	CD4	PRE_CD4	19	1	260	1	TGCATCGTCAGAGTCGGGGCCTCAGGAACCTACAAATACATCTTT	CIVRVGASGTYKYIF	TGCAGTGCTAGTTATTCTGAAGCTTTCTTT	CSASYSEAFF	ALPHA_21	BETA_57	ALPHA_21-BETA_57	1	1	1	1
069_E9_16_035_PRE_CD3POS_B	1	PRE	CD8	PRE_CD8			54	1			TGTGCCAGCAGCTTAGAGGGGACTTATTTCTACGAGCAGTACGTC	CASSLEGTYFYEQYV		BETA_383	NA-BETA_383		1		0
071_G9_16_035_PRE_CD3POS_A	1	PRE	CD8	PRE_CD8			32	1			TGTGCCACCGGGACAGGGGACCATGAGCAGTTCTTC	CATGTGDHEQFF		BETA_182	NA-BETA_182		1		0
071_G9_16_035_PRE_CD3POS_C	1	PRE	CD8	PRE_CD8	44	1	76	1	TGTGCTGCCAGGATCCGGGGCGGATCTGAAAAGCTGGTCTTT	CAARIRGGSEKLVF	TGTGCCAGCAGTTACCCCACCCGACTAGCGGGGAAATACAATGAGCAGTTCTTC	CASSYPTRLAGKYNEQFF	ALPHA_400	BETA_542	ALPHA_400-BETA_542	1	1	1	1
072_H9_16_035_PRE_CD3POS_B	0	PRE	CD4	PRE_CD4	185	1			TGTGCAGAGACCTCCGGTGGCTACAATAAGCTGATTTTT	CAETSGGYNKLIF			ALPHA_99		ALPHA_99-NA	1			0
072_H9_16_035_PRE_CD3POS_C	1	PRE	CD8	PRE_CD8	176	1	17	0.94	TGTGCCGTGTCAGGAAACACACCTCTTGTCTTT	CAVSGNTPLVF	TGTGCCAGCAGTGAAGACTCTCGGCCAGATACGCAGTATTTT	CASSEDSRPDTQYF	ALPHA_257	BETA_502	ALPHA_257-BETA_502	1	1	1	1
079_G10_16_035_PRE_CD3POS_C	2	PRE	CD8	PRE_CD8	15	0.56	51	1	TGTGCAATGAGAGAGGTCGGATACAACTTCAACAAATTTTACTTT	CAMREVGYNFNKFYF	TGTGCCAGCTCCCGCCGGGACAGGGCGAACACCGGGGAGCTGTTTTTT	CASSRRDRANTGELFF	ALPHA_65	BETA_642	ALPHA_65-BETA_642	1	1	1	1
080_H10_16_035_POST_CD3POS_A	0	POST	CD4	POST_CD4	87	1	124	1	TGTGCAGCAAGCCGGGGGAGCAGTGCTTCCAAGATAATCTTT	CAASRGSSASKIIF	TGCGCCAGCAGCCAAGAACCATCAGGACAGGGTTTGCGGGGCTACACCTTC	CASSQEPSGQGLRGYTF	ALPHA_127	BETA_95	ALPHA_127-BETA_95	1	1	1	1
082_B11_16_035_POST_CD3POS_A	0	POST	CD4	POST_CD4	2	1	50	1	TGTGCAGCGGGGGACTTTGGAAATGAGAAATTAACCTTT	CAAGDFGNEKLTF	TGTGCCAGCAGCTCTGGGGCTGAGCCCCAGCATTTT	CASSSGAEPQHF	ALPHA_176	BETA_365	ALPHA_176-BETA_365	1	1	1	1
085_E11_16_035_POST_CD3POS_B	2	POST	CD8	POST_CD8	115	1			TGTGCAGCAAGTATACGATCAGGAGGAGGTGCTGACGGACTCACCTTT	CAASIRSGGGADGLTF			ALPHA_153		ALPHA_153-NA	1			0
086_F11_16_035_POST_CD3POS_A	0	POST	CD4	POST_CD4			92	1			TGTGCCATCAGTGAGCCGTCCACAGGGATAGGCTATGGCTACACCTTC	CAISEPSTGIGYGYTF		BETA_685	NA-BETA_685		1		0
086_F11_16_035_PRE_CD3POS_B	0	PRE	CD4	PRE_CD4	32	1	134	0.99	TGTGCAGAGACCCCGAATTCTGGGGGTTACCAGAAAGTTACCTTT	CAETPNSGGYQKVTF	TGTGCCACCAGCAGTGCTTTTGACGATCAGCCCCAGCATTTT	CATSSAFDDQPQHF	ALPHA_98	BETA_171	ALPHA_98-BETA_171	1	1	1	1
086_F11_16_035_PRE_CD3POS_C	0	PRE	CD4	PRE_CD4	74	1	259	1	TGTGCTGTGAGGGACACGGGCAGGAGAGCACTTACTTTT	CAVRDTGRRALTF	TGTGCCACCTTCAGGACAGAAAACAATGAGCAGTTCTTC	CATFRTENNEQFF	ALPHA_466	BETA_184	ALPHA_466-BETA_184	1	1	1	1
087_G11_16_035_POST_CD3POS_B	0	POST	CD4	POST_CD4			61	1			TGTGCCAGCAGCCAATTCCAGAATCAGCCCCAGCATTTT	CASSQFQNQPQHF		BETA_244	NA-BETA_244		1		0
087_G11_16_035_PRE_CD3POS_A	2	PRE	CD8	PRE_CD8	108	1	186	0.99	TGTGTGGTGAGATCTGGTGGCTACAATAAGCTGATTTTT	CVVRSGGYNKLIF	TGTGCCAGCAGCGACAGTCTAAGCTCCTACAATGAGCAGTTCTTC	CASSDSLSSYNEQFF	ALPHA_615	BETA_314	ALPHA_615-BETA_314	1	2	1	1
088_H11_16_035_POST_CD3POS_B	2	POST	CD8	POST_CD8	11	0.92			TGTGCAATGAGAGAGGGCGGCCGGAGAGGAAAGCTTATCTTC	CAMREGGRRGKLIF			ALPHA_63		ALPHA_63-NA	1			0
094_F12_16_035_PRE_CD3POS_B	0	PRE	CD4	PRE_CD4	130	1	63	1	TGTGTGGCCTCTGGGGGTTACCAGAAAGTTACCTTT	CVASGGYQKVTF	TGTGCCAGCAGCTTTACCGGTGGATCTTGGGAACAAGAGACCCAGTACTTC	CASSFTGGSWEQETQYF	ALPHA_594	BETA_445	ALPHA_594-BETA_445	1	1	1	1
095_G12_16_035_PRE_CD3POS_A	0	PRE	CD4	PRE_CD4	30	1	82	1	TGTGCAGCTTTTTCTGGTTCTGCAAGGCAACTGACCTTT	CAAFSGSARQLTF	TGTGCCAGCAGTGTAAGGGCAGGGGGCACGGATACGCAGTATTTT	CASSVRAGGTDTQYF	ALPHA_180	BETA_534	ALPHA_180-BETA_534	1	1	1	1
095_G12_16_035_PRE_CD3POS_C	0	PRE	CD4	PRE_CD4	161	1			TGTGCTTATCGAGACACTGCCAGTAAACTCACCTTT	CAYRDTASKLTF			ALPHA_563		ALPHA_563-NA	1			0
001_A1_62_020_POST_CD3POS_A	0	POST	CD4	POST_CD4	252	1	63	1	TGTGCTGTGAGAGATGGTGGCTACAATAAGCTGATTTTT	CAVRDGGYNKLIF	TGTGCCAGCAGATTGGACAGGGACACAGATACGCAGTATTTT	CASRLDRDTDTQYF	ALPHA_455	BETA_212	ALPHA_455-BETA_212	1	1	1	1
001_A1_62_020_POST_CD3POS_B	0	POST	CD4	POST_CD4	44	1	88	1	TGTGCTGTGGAAAAGGACTACAAGCTCAGCTTT	CAVEKDYKLSF	TGTGCCAGCAGCTTAGATGGGAGCGGGGGGGCCCCAGATACGCAGTATTTT	CASSLDGSGGAPDTQYF	ALPHA_502	BETA_385	ALPHA_502-BETA_385	2	2	2	2
001_A1_62_020_POST_CD3POS_C	0	POST	CD4	POST_CD4	105	1	156	1	TGTGCCGGGTGGCGCTGGGGGAAATTGCAGTTT	CAGWRWGKLQF	TGTGCCAGCAGTGAATTAGAAGGAACACCTCTTAAGAATTTT	CASSELEGTPLKNF	ALPHA_226	BETA_513	ALPHA_226-BETA_513	1	1	1	1
001_A1_62_020_PRE_CD3POS_C	0	PRE	CD4	PRE_CD4			281	1			TGTGCCAGCACCTTTGCTTACCCATCTGGGGCCAACGTCCTGACTTTC	CASTFAYPSGANVLTF		BETA_195	NA-BETA_195		1		0
002_B1_62_020_POST_CD3POS_C	1	POST	CD8	POST_CD8	176	1			TGTGCTGGCGTGGATAGCAACTATCAGTTAATCTGG	CAGVDSNYQLIW			ALPHA_409		ALPHA_409-NA	1			0
002_B1_62_020_PRE_CD3POS_B	1	PRE	CD8	PRE_CD8	72	0.64	135	1	TGTGCTGTGTGGGCGGACACCGACAAGCTCATCTTT	CAVWADTDKLIF	TGTGCCAGCAGTCCCGAGCGGGGTTCCTACGAGCAGTACTTC	CASSPERGSYEQYF	ALPHA_539	BETA_486	ALPHA_539-BETA_486	1	1	1	1
003_C1_62_020_POST_CD3POS_A	1	POST	CD8	POST_CD8			144	1			TGTGCCAGCAGCTTTGCTTCGGGGACGCAAGAGACCCAGTACTTC	CASSFASGTQETQYF		BETA_450	NA-BETA_450		12		0
003_C1_62_020_POST_CD3POS_C	1	POST	CD8	POST_CD8	51	1	106	1	TGTGCTCTCAAGAACTCAAATTCCGGGTATGCACTCAACTTC	CALKNSNSGYALNF	TGTGCCAGCAGCTTTGCTTCGGGGACGCAAGAGACCCAGTACTTC	CASSFASGTQETQYF	ALPHA_332	BETA_450	ALPHA_332-BETA_450	7	12	7	2
003_C1_62_020_PRE_CD3POS_C	0	PRE	CD4	PRE_CD4	218	1	170	1	TGTGCTGTGGACTCGAGTACTGGAGGCTTCAAAACTATCTTT	CAVDSSTGGFKTIF	TGCAGTGCTAGGGGAGGACTAGCGGGAAGCGAGCAGTACTTC	CSARGGLAGSEQYF	ALPHA_503	BETA_54	ALPHA_503-BETA_54	1	1	1	1
004_D1_62_020_POST_CD3POS_B	1	POST	CD8	POST_CD8	153	1	233	1	TGTGCTGTCGTCTGTAATGCAGGCAACATGCTCACCTTT	CAVVCNAGNMLTF	TGTGCCAGCAGCATGTGGACAGGAGTCAATGAGCAGTTCTTC	CASSMWTGVNEQFF	ALPHA_433	BETA_220	ALPHA_433-BETA_220	2	2	2	2
004_D1_62_020_PRE_CD3POS_C	0	PRE	CD4	PRE_CD4			68	1			TGTGCCAGCAGGTCGACTCCGTCTAGCTCTGGGGCCAACGTCCTGACTTTC	CASRSTPSSSGANVLTF		BETA_463	NA-BETA_463		1		0
005_E1_62_020_POST_CD3POS_A	1	POST	CD8	POST_CD8	54	1	267	1	TGTGCTCTCAAGAACTCAAATTCCGGGTATGCACTCAACTTC	CALKNSNSGYALNF	TGTGCCAGCAGCTTTGCTTCGGGGACGCAAGAGACCCAGTACTTC	CASSFASGTQETQYF	ALPHA_332	BETA_450	ALPHA_332-BETA_450	7	12	7	2
005_E1_62_020_POST_CD3POS_C	0	POST	CD4	POST_CD4	270	1	188	1	TGTGCAATGGCCGATTCAGGATACAGCACCCTCACCTTT	CAMADSGYSTLTF	TGCAGTGCCAACTACAAGGGACAGGAACAGCCCCAGCATTTT	CSANYKGQEQPQHF	ALPHA_77	BETA_15	ALPHA_77-BETA_15	1	1	1	1
005_E1_62_020_PRE_CD3POS_B	0	PRE	CD4	PRE_CD4	84	1	238	1	TGTGCTGGGCAGAAGATCGGCGGTAACCAGTTCTATTTT	CAGQKIGGNQFYF	TGCAGTGCTAGAGGACAGGGTGCCACCGGGGAGCTGTTTTTT	CSARGQGATGELFF	ALPHA_411	BETA_37	ALPHA_411-BETA_37	1	1	1	1
006_F1_62_020_POST_CD3POS_A	2	POST	CD8	POST_CD8			209	1			TGTGCCACCAGTGATTTGTCCATCAATCAGCCCCAGCATTTT	CATSDLSINQPQHF		BETA_177	NA-BETA_177		1		0
006_F1_62_020_POST_CD3POS_B	0	POST	CD4	POST_CD4	19	1	568	1	TGTGCTTTCATGAAACCGACGGCAGGCAACATGCTCACCTTT	CAFMKPTAGNMLTF	TGTGCCAGCAGCTTATCCTCACAGCCATACTACGAGCAGTACTTC	CASSLSSQPYYEQYF	ALPHA_571	BETA_409	ALPHA_571-BETA_409	1	1	1	1
007_G1_62_020_PRE_CD3POS_B	0	PRE	CD4	PRE_CD4	162	0.99			TGTGCTGAGGATGCTGGCAACAACCGTAAGCTGATTTGG	CAEDAGNNRKLIW			ALPHA_397		ALPHA_397-NA	1			0
007_G1_62_020_PRE_CD3POS_C	0	PRE	CD4	PRE_CD4	697	0.87	142	1	TGTGCAATGTTAGACACCGGTAACCAGTTCTATTTT	CAMLDTGNQFYF	TGCAGTGTTGAGGGGGTACCCTATGGCTACACCTTC	CSVEGVPYGYTF	ALPHA_81	BETA_78	ALPHA_81-BETA_78	1	1	1	1
008_H1_62_020_POST_CD3POS_A	0	POST	CD4	POST_CD4			427	1			TGTGCCAGCAGCTTAGCGACAGGAGGTCAGCCCCAGCATTTT	CASSLATGGQPQHF		BETA_391	NA-BETA_391		1		0
008_H1_62_020_PRE_CD3POS_B	0	PRE	CD4	PRE_CD4	24	0.96	127	1	TGTGCTGTGACTGGGGCTGGGAGTTACCAACTCACTTTC	CAVTGAGSYQLTF	TGCAGTGCTCTGATCGGGGGGAGGGACACTGAAGCTTTCTTT	CSALIGGRDTEAFF	ALPHA_442	BETA_70	ALPHA_442-BETA_70	3	3	3	2
008_H1_62_020_PRE_CD3POS_C	0	PRE	CD4	PRE_CD4	117	1	207	1	TGTGCAGCAAGCCAGATGGGAGGAAAGCTTATCTTC	CAASQMGGKLIF	TGTGCCAGCAGCCGGGACAGGGAAGAGACCCAGTACTTC	CASSRDREETQYF	ALPHA_125	BETA_295	ALPHA_125-BETA_295	1	1	1	1
009_A2_62_020_POST_CD3POS_B	0	POST	CD4	POST_CD4	22	1	198	1	TGTGCTGTGACTAGCAACACAGGCAAACTAATCTTT	CAVTSNTGKLIF	TGTGCCAGCTCACCAGGCCGGGATGGGGATGAGCAGTTCTTC	CASSPGRDGDEQFF	ALPHA_441	BETA_629	ALPHA_441-BETA_629	3	3	3	2
009_A2_62_020_POST_CD3POS_C	1	POST	CD8	POST_CD8	38	1	212	1	TGTGTGGTGAGCCCCCGTCGGGACTTTGGAAATGAGAAATTAACCTTT	CVVSPRRDFGNEKLTF	TGTGCCAGCAGCTTCGGGACAGACAACAATGAGCAGTTCTTC	CASSFGTDNNEQFF	ALPHA_618	BETA_418	ALPHA_618-BETA_418	5	5	5	2
009_A2_62_020_PRE_CD3POS_C	1	PRE	CD8	PRE_CD8	72	1	204	1	TGTGCTGTGAGAGATGGGGACTACAAGCTCAGCTTT	CAVRDGDYKLSF	TGTGCCAGCAGCCAAGAAGGGCCGTCGGACGAGCAGTACTTC	CASSQEGPSDEQYF	ALPHA_454	BETA_227	ALPHA_454-BETA_227	1	1	1	1
010_B2_62_020_POST_CD3POS_B	0	POST	CD4	POST_CD4	501	0.99	96	1	TGTGCTGTGATTTCTTCTGGTTCTGCAAGGCAACTGACCTTT	CAVISSGSARQLTF	TGTGCCAGCAGCTTCCAGACAGGAGGAGAGACCCAGTACTTC	CASSFQTGGETQYF	ALPHA_492	BETA_413	ALPHA_492-BETA_413	1	1	1	1
010_B2_62_020_POST_CD3POS_C	1	POST	CD8	POST_CD8	144	0.99	128	0.96	TGTGCCCTCATGGACACGGGCAGGAGAGCACTTACTTTT	CALMDTGRRALTF	TGTGCCAGCAGTTTTGGGTCGCAAGAGACCCAGTACTTC	CASSFGSQETQYF	ALPHA_215	BETA_607	ALPHA_215-BETA_607	2	2	2	2
010_B2_62_020_PRE_CD3POS_C	1	PRE	CD8	PRE_CD8	48	1	32	1	TGTGTGGAATCAGGAGGAGGTGCTGACGGACTCACCTTT	CVESGGGADGLTF	TGTGCCAGCGCAATCTGGACAGGGGTGGATCAGCCCCAGCATTTT	CASAIWTGVDQPQHF	ALPHA_592	BETA_617	ALPHA_592-BETA_617	3	3	3	2
011_C2_62_020_POST_CD3POS_A	1	POST	CD8	POST_CD8	121	1	135	1	TGTGCTCTATCCCCATCTTATAACACCGACAAGCTCATCTTT	CALSPSYNTDKLIF	TGCAGTGCCATCCCTGGCGGACTAGCGGGAGACTTGGTCTATGAGCAGTTCTTC	CSAIPGGLAGDLVYEQFF	ALPHA_331	BETA_18	ALPHA_331-BETA_18	2	2	2	2
011_C2_62_020_POST_CD3POS_B	1	POST	CD8	POST_CD8	39	1	17	0.94	TGTGCTGTCAGATCTCAATGGGGTGGAAATGAGAAATTAACCTTT	CAVRSQWGGNEKLTF	TGTGCCAGCAGTCCATGGGACAGGTGGGAGTTCTTC	CASSPWDRWEFF	ALPHA_427	BETA_479	ALPHA_427-BETA_479	1	2	1	1
012_D2_62_020_POST_CD3POS_C	1	POST	CD8	POST_CD8			283	0.99			TGTGCCAGCAGTCCATGGGACAGGTGGGAGTTCTTC	CASSPWDRWEFF		BETA_479	NA-BETA_479		2		0
013_E2_62_020_POST_CD3POS_A	0	POST	CD4	POST_CD4	384	1	53	1	TGTGCTGTGCAGGCACTTGGTGGTTCTGCAAGGCAACTGACCTTT	CAVQALGGSARQLTF	TGCAGCGCTTGGACAGGGCTGAGTGAAAAACTGTTTTTT	CSAWTGLSEKLFF	ALPHA_495	BETA_4	ALPHA_495-BETA_4	1	1	1	1
013_E2_62_020_POST_CD3POS_B	1	POST	CD8	POST_CD8	73	1	227	1	TGTGTGGTGAGCGTGGGAACCTACAAATACATCTTT	CVVSVGTYKYIF	TGTGCCAGCAGCTTAGTGTCGGGAGGCCTCACAGATACGCAGTATTTT	CASSLVSGGLTDTQYF	ALPHA_623	BETA_405	ALPHA_623-BETA_405	5	6	5	2
013_E2_62_020_POST_CD3POS_C	0	POST	CD4	POST_CD4			35	1			TGCAGCGCGCTGCCGGGTGGGGGCCTCTATGGCTACACCTTC	CSALPGGGLYGYTF		BETA_3	NA-BETA_3		1		0
013_E2_62_020_PRE_CD3POS_B	0	PRE	CD4	PRE_CD4	107	0.96	43	1	TGCATCCTGAAGGGTAACCAGTTCTATTTT	CILKGNQFYF	TGTGCCAGCAGTGATCTGAGACTAGCGGGGTCTGGGGCCAACGTCCTGACTTTC	CASSDLRLAGSGANVLTF	ALPHA_4	BETA_525	ALPHA_4-BETA_525	1	1	1	1
013_E2_62_020_PRE_CD3POS_C	0	PRE	CD4	PRE_CD4	230	1	305	1	TGTGTGGTGAACGGGGAAACAGGCTTTCAGAAACTTGTATTT	CVVNGETGFQKLVF	TGTGCCAGCAGCCAAGACGTAGGAGAGACCCAGTACTTC	CASSQDVGETQYF	ALPHA_607	BETA_228	ALPHA_607-BETA_228	1	1	1	1
014_F2_62_020_POST_CD3POS_B	1	POST	CD8	POST_CD8	35	1	56	1	TGTGCTCTCAAGAACTCAAATTCCGGGTATGCACTCAACTTC	CALKNSNSGYALNF	TGTGCCAGCAGCTTTGCTTCGGGGACGCAAGAGACCCAGTACTTC	CASSFASGTQETQYF	ALPHA_332	BETA_450	ALPHA_332-BETA_450	7	12	7	2
014_F2_62_020_POST_CD3POS_C	0	POST	CD4	POST_CD4	887	1	203	1	TGTGCTGTTGGATCTGGTTCTGCAAGGCAACTGACCTTT	CAVGSGSARQLTF	TGTGCCAGCAGCGCGACAGAGGGCGGCGAGCAGTACTTC	CASSATEGGEQYF	ALPHA_542	BETA_323	ALPHA_542-BETA_323	1	1	1	1
015_G2_62_020_PRE_CD3POS_B	0	PRE	CD4	PRE_CD4	87	1			TGTGCTGTGGGTGGAGTAGCTGCAGGCAACAAGCTAACTTTT	CAVGGVAAGNKLTF			ALPHA_533		ALPHA_533-NA	1			0
015_G2_62_020_PRE_CD3POS_C	0	PRE	CD4	PRE_CD4			51	1			TGTGCCAGCAGCTTGACGGGCCGGGACTTCTATGGCTACACCTTC	CASSLTGRDFYGYTF		BETA_423	NA-BETA_423		1		0
016_H2_62_020_POST_CD3POS_B	0	POST	CD4	POST_CD4			33	0.94			TGTGCCAGCAGCTTTGGAATTGGGGAACTCCAAGAGACCCAGTACTTC	CASSFGIGELQETQYF		BETA_451	NA-BETA_451		1		0
016_H2_62_020_POST_CD3POS_C	0	POST	CD4	POST_CD4	35	1	117	1	TGTGTTGTGAGTGAAAGCTCTAGCAACACAGGCAAACTAATCTTT	CVVSESSSNTGKLIF	TGTGCCAGCAGTTACTCGAATGAGCGGATCACAGATACGCAGTATTTT	CASSYSNERITDTQYF	ALPHA_635	BETA_554	ALPHA_635-BETA_554	1	1	1	1
016_H2_62_020_PRE_CD3POS_B	0	PRE	CD4	PRE_CD4	19	1	16	1	TGTGCCTCCGCGTTTTCAGATGGCCAGAAGCTGCTCTTT	CASAFSDGQKLLF	TGTGCCAGCAGTGAAGTCGGGGCGGGAGACTATGGCTACACCTTC	CASSEVGAGDYGYTF	ALPHA_265	BETA_509	ALPHA_265-BETA_509	1	1	1	1
017_A3_62_020_POST_CD3POS_A	0	POST	CD4	POST_CD4	215	1	121	1	TGTGTTGTGACCCTTCCGGGAGGAGGAAACAAACTCACCTTT	CVVTLPGGGNKLTF	TGTGCCAGCAGAGAGGAGGGGCGTAATTCACCCCTCCACTTT	CASREEGRNSPLHF	ALPHA_630	BETA_210	ALPHA_630-BETA_210	1	1	1	1
017_A3_62_020_POST_CD3POS_B	0	POST	CD4	POST_CD4	37	0.66	71	1	TGTGCTGTGGGTGCAGGAACCTACAAATACATCTTT	CAVGAGTYKYIF	TGTGCCAGCAGTCCCCTCCTTGGGGGGGTTAACAATGAGCAGTTCTTC	CASSPLLGGVNNEQFF	ALPHA_525	BETA_485	ALPHA_525-BETA_485	2	2	2	2
017_A3_62_020_POST_CD3POS_C	1	POST	CD8	POST_CD8	51	1	9	1	TGTGTGGTGAGCCCCCGTCGGGACTTTGGAAATGAGAAATTAACCTTT	CVVSPRRDFGNEKLTF	TGTGCCAGCAGCTTCGGGACAGACAACAATGAGCAGTTCTTC	CASSFGTDNNEQFF	ALPHA_618	BETA_418	ALPHA_618-BETA_418	5	5	5	2
017_A3_62_020_PRE_CD3POS_B	0	PRE	CD4	PRE_CD4	98	1	36	0.95	TGTGCCGGCCGTATAGCTGCAAGGCAACTGACCTTT	CAGRIAARQLTF	TGCGCCAGCGGGGGACTAGCGGGGGGCACAGATACGCAGTATTTT	CASGGLAGGTDTQYF	ALPHA_225	BETA_160	ALPHA_225-BETA_160	1	1	1	1
017_A3_62_020_PRE_CD3POS_C	1	PRE	CD8	PRE_CD8	227	1	350	1	TGTGTGCTCCACCAGGCAGGAACTGCTCTGATCTTT	CVLHQAGTALIF	TGTGCCAGCAGCGGACAGGTCAACTACGAGCAGTACTTC	CASSGQVNYEQYF	ALPHA_591	BETA_326	ALPHA_591-BETA_326	2	2	2	2
018_B3_62_020_POST_CD3POS_A	1	POST	CD8	POST_CD8	607	1	288	1	TGTGCTGCGGAACCGACCCTGGGGGACAGCTGGGGGAAATTGCAGTTT	CAAEPTLGDSWGKLQF	TGTGCCAGCAGTGAGCCGGGGACCCAGTACTTC	CASSEPGTQYF	ALPHA_405	BETA_518	ALPHA_405-BETA_518	1	1	1	1
018_B3_62_020_POST_CD3POS_C	0	POST	CD4	POST_CD4	81	0.62	95	1	TGTGCTCTAGACATCGGGACGGGCAGGAGAGCACTTACTTTT	CALDIGTGRRALTF	TGTGCCAGCAGTCGTGGGACTAGCGGGAGGGCCGTAGAGACCCAGTACTTC	CASSRGTSGRAVETQYF	ALPHA_326	BETA_495	ALPHA_326-BETA_495	1	1	1	1
018_B3_62_020_PRE_CD3POS_C	0	PRE	CD4	PRE_CD4	35	1	252	1	TGTGCTGTGGTACCCCTAGATAGCAACTATCAGTTAATCTGG	CAVVPLDSNYQLIW	TGTGCCAGCAGACCTCCCGGAGGGCAGGGGAGTGAAGCTTTCTTT	CASRPPGGQGSEAFF	ALPHA_535	BETA_209	ALPHA_535-BETA_209	1	1	1	1
019_C3_62_020_POST_CD3POS_B	0	POST	CD4	POST_CD4	113	1	138	1	TGTGCAGAGAATATTAACGAAGGAGGAAGCTACATACCTACATTT	CAENINEGGSYIPTF	TGTGCCAGCAGCCTGCGACACCGCTTCCAAGAGACCCAGTACTTC	CASSLRHRFQETQYF	ALPHA_96	BETA_308	ALPHA_96-BETA_308	2	2	2	2
019_C3_62_020_POST_CD3POS_C	0	POST	CD4	POST_CD4	129	0.98	286	1	TGTGCAGAGAAGGGAGGACGGACCGGCACTGCCAGTAAACTCACCTTT	CAEKGGRTGTASKLTF	TGTGCCAGCAGCTTTCAAGGGGGCTCATCAGCTGAGCAGTTCTTC	CASSFQGGSSAEQFF	ALPHA_91	BETA_446	ALPHA_91-BETA_446	1	1	1	1
019_C3_62_020_PRE_CD3POS_B	0	PRE	CD4	PRE_CD4			45	1			TGTGCCAGCAGGACCGCAACTAATGAAAAACTGTTTTTT	CASRTATNEKLFF		BETA_455	NA-BETA_455		1		0
019_C3_62_020_PRE_CD3POS_C	0	PRE	CD4	PRE_CD4	171	1	94	1	TGTGCAGCAAGTCAAGGGGGTTACCAGAAAGTTACCTTT	CAASQGGYQKVTF	TGTGCCAGCAGTTCGACTAGCGGCCCAGATACGCAGTATTTT	CASSSTSGPDTQYF	ALPHA_155	BETA_570	ALPHA_155-BETA_570	1	1	1	1
020_D3_62_020_POST_CD3POS_C	1	POST	CD8	POST_CD8	32	1	164	1	TGTGCAGGCCCTATCTCAGGAACCTACAAATACATCTTT	CAGPISGTYKYIF	TGTGCCAGCTCATTTCGGGACAGGGTAGCAGATACGCAGTATTTT	CASSFRDRVADTQYF	ALPHA_190	BETA_640	ALPHA_190-BETA_640	1	1	1	1
020_D3_62_020_PRE_CD3POS_B	2	PRE	CD8	PRE_CD8			64	1			TGCGCCACCACGGGACACCTTAATGAAAAACTGTTTTTT	CATTGHLNEKLFF		BETA_79	NA-BETA_79		1		0
021_E3_62_020_POST_CD3POS_A	1	POST	CD8	POST_CD8	112	0.53	184	1	TGTGCAGCAGGTTTTAATTCAGGAAACACACCTCTTGTCTTT	CAAGFNSGNTPLVF	TGTGCCAGCAGCTTAGTGTCGGGAGGCCTCACAGATACGCAGTATTTT	CASSLVSGGLTDTQYF	ALPHA_164	BETA_405	ALPHA_164-BETA_405	1	6	1	1
021_E3_62_020_POST_CD3POS_C	1	POST	CD8	POST_CD8	161	1	192	1	TGTGTTGTGAGTGATCCCCTTAACGACTACAAGCTCAGCTTT	CVVSDPLNDYKLSF	TGTGCCAGCAGCCCAGGGGGGGCCAACGTCCTGACTTTC	CASSPGGANVLTF	ALPHA_638	BETA_261	ALPHA_638-BETA_261	1	1	1	1
021_E3_62_020_PRE_CD3POS_B	2	PRE	CD8	PRE_CD8	32	1	147	1	TGTGCAGCCCTGAACACAGGCTTTCAGAAACTTGTATTT	CAALNTGFQKLVF	TGTGCCAGCAGCCAAGATCGGCGGGAGGGTCCCTACAATGAGCAGTTCTTC	CASSQDRREGPYNEQFF	ALPHA_170	BETA_235	ALPHA_170-BETA_235	2	3	2	2
022_F3_62_020_POST_CD3POS_A	1	POST	CD8	POST_CD8			38	1			TGTGCCAGCAGCTTTGCTTCGGGGACGCAAGAGACCCAGTACTTC	CASSFASGTQETQYF		BETA_450	NA-BETA_450		12		0
022_F3_62_020_POST_CD3POS_B	1	POST	CD8	POST_CD8	157	1	11	1	TGTGCTGTGAGCTACTTCCAGGGAGCCCAGAAGCTGGTATTT	CAVSYFQGAQKLVF	TGTGCCAGCAGTATAGGGTGGGGCACTGGGAAGGTAGAGAATCAGCCCCAGCATTTT	CASSIGWGTGKVENQPQHF	ALPHA_462	BETA_474	ALPHA_462-BETA_474	1	1	1	1
022_F3_62_020_POST_CD3POS_C	1	POST	CD8	POST_CD8	215	1	688	1	TGTGCTACGGACTCCGACAGAGGCTCAACCCTGGGGAGGCTATACTTT	CATDSDRGSTLGRLYF	TGTGCCAGCAGCGGCCGTGTGGGCGGCACAGATACGCAGTATTTT	CASSGRVGGTDTQYF	ALPHA_310	BETA_330	ALPHA_310-BETA_330	2	2	2	2
023_G3_62_020_POST_CD3POS_A	0	POST	CD4	POST_CD4			40	1			TGTGCCACCAGCAACTCGGCCAGCTTCCCAGAAAAACTGTTTTTT	CATSNSASFPEKLFF		BETA_165	NA-BETA_165		1		0
023_G3_62_020_POST_CD3POS_B	1	POST	CD8	POST_CD8	5	1	325	1	TGTGCTCTCAAGAACTCAAATTCCGGGTATGCACTCAACTTC	CALKNSNSGYALNF	TGTGCCAGCAGCTTTGCTTCGGGGACGCAAGAGACCCAGTACTTC	CASSFASGTQETQYF	ALPHA_332	BETA_450	ALPHA_332-BETA_450	7	12	7	2
023_G3_62_020_PRE_CD3POS_B	1	PRE	CD8	PRE_CD8	252	0.75	414	1	TGTGCAGAGAGGGTCGACTACAAGCTCAGCTTT	CAERVDYKLSF	TGTGCCAGCAGTTTACCCATAGCGGGAGCAGGCGCCGGGGAGCTGTTTTTT	CASSLPIAGAGAGELFF	ALPHA_102	BETA_582	ALPHA_102-BETA_582	3	4	3	2
024_H3_62_020_POST_CD3POS_A	1	POST	CD8	POST_CD8	84	1			TGTGCTACGGGCCTAAATACTGGAGGCTTCAAAACTATCTTT	CATGLNTGGFKTIF			ALPHA_313		ALPHA_313-NA	1			0
024_H3_62_020_POST_CD3POS_B	0	POST	CD4	POST_CD4			84	0.89			TGCGCCAGCAGCTTGGTGGGATTGGGCAATCAGCCCCAGCATTTT	CASSLVGLGNQPQHF		BETA_146	NA-BETA_146		1		0
024_H3_62_020_PRE_CD3POS_B	0	PRE	CD4	PRE_CD4	66	0.73			TGTGCTACGGACTGGGAAGACAATAACAATGACATGCGCTTT	CATDWEDNNNDMRF			ALPHA_311		ALPHA_311-NA	1			0
024_H3_62_020_PRE_CD3POS_C	0	PRE	CD4	PRE_CD4	96	1	215	0.82	TGTGCTGTGAGAGATCTCAAAGCTGCAGGCAACAAGCTAACTTTT	CAVRDLKAAGNKLTF	TGTGCCAGCAGTTCCCCAATGGGGTACAGCTACGAGCAGTACTTC	CASSSPMGYSYEQYF	ALPHA_452	BETA_566	ALPHA_452-BETA_566	1	1	1	1
025_A4_62_020_POST_CD3POS_A	1	POST	CD8	POST_CD8	7	1	152	1	TGTGCAATGAGTTTAGATGACAAGATCATCTTT	CAMSLDDKIIF	TGTGCCAGCAGCTCGAGACTAGCGGGGGGACCATTCTCCTACAATGAGCAGTTCTTC	CASSSRLAGGPFSYNEQFF	ALPHA_73	BETA_361	ALPHA_73-BETA_361	1	1	1	1
025_A4_62_020_POST_CD3POS_B	0	POST	CD4	POST_CD4	36	0.77	125	1	TGTGCTGTGGGTGCAGGAACCTACAAATACATCTTT	CAVGAGTYKYIF	TGTGCCAGCAGTCCCCTCCTTGGGGGGGTTAACAATGAGCAGTTCTTC	CASSPLLGGVNNEQFF	ALPHA_525	BETA_485	ALPHA_525-BETA_485	2	2	2	2
026_B4_62_020_POST_CD3POS_A	1	POST	CD8	POST_CD8	44	1	172	1	TGTGCACGCGGGGGGGGAAACACACCTCTTGTCTTT	CARGGGNTPLVF	TGTGCCAGCAAAGGGACTGCCTCTAGAAATGAGCAGTTCTTC	CASKGTASRNEQFF	ALPHA_86	BETA_185	ALPHA_86-BETA_185	2	2	2	2
026_B4_62_020_POST_CD3POS_C	0	POST	CD4	POST_CD4	68	1	48	1	TGCCTCGTTCCTATTTCTTCTGGTTCTGCAAGGCAACTGACCTTT	CLVPISSGSARQLTF	TGTGCCAGCAGCTTGGAGGGGACACTAGCGGGGTTTTCTAGCACAGATACGCAGTATTTT	CASSLEGTLAGFSSTDTQYF	ALPHA_40	BETA_427	ALPHA_40-BETA_427	1	1	1	1
027_C4_62_020_POST_CD3POS_A	0	POST	CD4	POST_CD4	94	1	282	1	TGTGCTGTGGATGACACGGGCAGGAGAGCACTTACTTTT	CAVDDTGRRALTF	TGTGCCAGCAGCGTAGCCTCAGGGGGAGATACGCAGTATTTT	CASSVASGGDTQYF	ALPHA_508	BETA_336	ALPHA_508-BETA_336	1	1	1	1
027_C4_62_020_POST_CD3POS_C	0	POST	CD4	POST_CD4	119	1	96	1	TGTGCAGGATACTTTGGAAATGAGAAATTAACCTTT	CAGYFGNEKLTF	TGCGCCAGCAGCAGGACAGCCTTCAATGAAAAACTGTTTTTT	CASSRTAFNEKLFF	ALPHA_187	BETA_89	ALPHA_187-BETA_89	1	1	1	1
028_D4_62_020_POST_CD3POS_B	0	POST	CD4	POST_CD4	107	1	186	1	TGTGCTGTGGTCCGCTCAGGAACCTACAAATACATCTTT	CAVVRSGTYKYIF	TGTGCCAGCAGTCCCCGGGAGGGCCGGAATGAGCAGTTCTTC	CASSPREGRNEQFF	ALPHA_536	BETA_484	ALPHA_536-BETA_484	1	1	1	1
029_E4_62_020_POST_CD3POS_C	0	POST	CD4	POST_CD4			64	1			TGCGCCAGCACCGCAGGGGGCTTTGGAAACACCATATATTTT	CASTAGGFGNTIYF		BETA_82	NA-BETA_82		1		0
030_F4_62_020_POST_CD3POS_A	0	POST	CD4	POST_CD4	157	1	146	1	TGTGCTCTGAGTGAGGCGCAAACTGGGGCAAACAACCTCTTCTTT	CALSEAQTGANNLFF	TGCAGTGCTAGAGGTGGACCCAACCCGAACACTGAAGCTTTCTTT	CSARGGPNPNTEAFF	ALPHA_353	BETA_40	ALPHA_353-BETA_40	2	2	2	2
030_F4_62_020_PRE_CD3POS_C	0	PRE	CD4	PRE_CD4	45	1	64	1	TGTGCTCTAGACATGAACACAGGCTTTCAGAAACTTGTATTT	CALDMNTGFQKLVF	TGTGCCAGCAGTTTAGCGGGAGGCAATGAGCAGTTCTTC	CASSLAGGNEQFF	ALPHA_328	BETA_588	ALPHA_328-BETA_588	1	1	1	1
031_G4_62_020_POST_CD3POS_A	0	POST	CD4	POST_CD4	144	1	306	1	TGTGCTAAGGGCTCAGGAACCTACAAATACATCTTT	CAKGSGTYKYIF	TGCGCCAGCAGCCTCGACACACCCAACACAGATACGCAGTATTTT	CASSLDTPNTDTQYF	ALPHA_297	BETA_127	ALPHA_297-BETA_127	1	1	1	1
031_G4_62_020_POST_CD3POS_B	1	POST	CD8	POST_CD8			165	1			TGTGCCAGCAGCTTTGCTTCGGGGACGCAAGAGACCCAGTACTTC	CASSFASGTQETQYF		BETA_450	NA-BETA_450		12		0
032_H4_62_020_POST_CD3POS_B	0	POST	CD4	POST_CD4	20	0.87	310	1	TGTGCTGTGACTGGGGCTGGGAGTTACCAACTCACTTTC	CAVTGAGSYQLTF	TGCAGTGCTCTGATCGGGGGGAGGGACACTGAAGCTTTCTTT	CSALIGGRDTEAFF	ALPHA_442	BETA_70	ALPHA_442-BETA_70	3	3	3	2
032_H4_62_020_POST_CD3POS_C	0	POST	CD4	POST_CD4	81	1	513	1	TGTGCTGTGAGTGACGGAAGCCAAGGAAATCTCATCTTT	CAVSDGSQGNLIF	TGTGCCAGTAATAGCGGCAGCTCCTACAATGAGCAGTTCTTC	CASNSGSSYNEQFF	ALPHA_474	BETA_647	ALPHA_474-BETA_647	1	1	1	1
032_H4_62_020_PRE_CD3POS_B	0	PRE	CD4	PRE_CD4	31	1	55	0.93	TGTGCTGCGCAGTTTTCAGATGGCCAGAAGCTGCTCTTT	CAAQFSDGQKLLF	TGTGCCAGCATACTAGCGGGGGCCGGGGCCCAGTACTTC	CASILAGAGAQYF	ALPHA_404	BETA_609	ALPHA_404-BETA_609	1	1	1	1
033_A5_62_020_POST_CD3POS_A	0	POST	CD4	POST_CD4	20	0.83	52	0.57	TGTGCAGCAAGCGCGGGAACCGGTAACCAGTTCTATTTT	CAASAGTGNQFYF	TGCGCCAGCAGTCAACGGGACAGGGGCGAGAAAGCTAACTATGGCTACACCTTC	CASSQRDRGEKANYGYTF	ALPHA_136	BETA_150	ALPHA_136-BETA_150	1	1	1	1
033_A5_62_020_POST_CD3POS_B	0	POST	CD4	POST_CD4	27	1	50	1	TGTGCAGAGAGTCCCGTGTCGAACACCGACAAGCTCATCTTT	CAESPVSNTDKLIF	TGTGCCAGCACCCAAAGCGGGAAGTGGGGGGAGCTGTTTTTT	CASTQSGKWGELFF	ALPHA_105	BETA_188	ALPHA_105-BETA_188	2	2	2	2
033_A5_62_020_POST_CD3POS_C	0	POST	CD4	POST_CD4	21	1	52	1	TGTGCTCTGAGTGGTGGGAGCATGGACACGGGCAGGAGAGCACTTACTTTT	CALSGGSMDTGRRALTF	TGTGCCAGCAGCGGTGGGGTGGGATATGGGGCCAACGTCCTGACTTTC	CASSGGVGYGANVLTF	ALPHA_365	BETA_331	ALPHA_365-BETA_331	1	1	1	1
034_B5_62_020_POST_CD3POS_A	1	POST	CD8	POST_CD8	67	1	64	1	TGCGGCACAGAAGCCTCAGGAACCTACAAATACATCTTT	CGTEASGTYKYIF	TGTGCCAGCAGCTCCTACGGGGGACTGGGCGACTATGGCTACACCTTC	CASSSYGGLGDYGYTF	ALPHA_46	BETA_358	ALPHA_46-BETA_358	1	1	1	1
034_B5_62_020_POST_CD3POS_B	1	POST	CD8	POST_CD8	24	1	68	1	TGTGTGGTGAGCCCCCGTCGGGACTTTGGAAATGAGAAATTAACCTTT	CVVSPRRDFGNEKLTF	TGTGCCAGCAGCTTCGGGACAGACAACAATGAGCAGTTCTTC	CASSFGTDNNEQFF	ALPHA_618	BETA_418	ALPHA_618-BETA_418	5	5	5	2
034_B5_62_020_PRE_CD3POS_B	1	PRE	CD8	PRE_CD8	53	1	126	1	TGTGCAGAGAGGGTCGACTACAAGCTCAGCTTT	CAERVDYKLSF	TGTGCCAGCAGTTTACCCATAGCGGGAGCAGGCGCCGGGGAGCTGTTTTTT	CASSLPIAGAGAGELFF	ALPHA_102	BETA_582	ALPHA_102-BETA_582	3	4	3	2
035_C5_62_020_POST_CD3POS_A	0	POST	CD4	POST_CD4	85	0.94	68	1	TGTGCAATGAGAGAGGTTTTTTCTGGTGGCTACAATAAGCTGATTTTT	CAMREVFSGGYNKLIF	TGTGCCAGCTCACCGGGACAGATTCAGTACTTC	CASSPGQIQYF	ALPHA_66	BETA_634	ALPHA_66-BETA_634	1	1	1	1
035_C5_62_020_PRE_CD3POS_B	0	PRE	CD4	PRE_CD4			29	1			TGTGCCAGCAGCCAAGATCGGCGGGAGGGTCCCTACAATGAGCAGTTCTTC	CASSQDRREGPYNEQFF		BETA_235	NA-BETA_235		3		0
036_D5_62_020_POST_CD3POS_A	1	POST	CD8	POST_CD8			139	1			TGTGCCAGCAGCCGGGCCCCCTCCTACGAGCAGTACTTC	CASSRAPSYEQYF		BETA_296	NA-BETA_296		1		0
036_D5_62_020_POST_CD3POS_B	0	POST	CD4	POST_CD4	133	1	392	1	TGTGCTGGGGACCCTGGGGGTTACCAGAAAGTTACCTTT	CAGDPGGYQKVTF	TGTGCCAGCAGCCCCGGGGATCCGGAATCCTACGAGCAGTACTTC	CASSPGDPESYEQYF	ALPHA_419	BETA_276	ALPHA_419-BETA_276	1	1	1	1
036_D5_62_020_PRE_CD3POS_C	2	PRE	CD8	PRE_CD8	209	1			TGTGCCTGTGACACCGTGATGGGGGAGCACGGCTCCTGGGACACCCGACAGATGTTTTTC	CACDTVMGEHGSWDTRQMFF			ALPHA_273		ALPHA_273-NA	1			0
037_E5_62_020_POST_CD3POS_A	1	POST	CD8	POST_CD8	64	1			TGTGCTCTTGCTTCCACTGGGGGATACCCACAGTACACCGATAAACTCATCTTT	CALASTGGYPQYTDKLIF			ALPHA_377		ALPHA_377-NA	1			0
037_E5_62_020_POST_CD3POS_C	0	POST	CD4	POST_CD4	441	1	562	1	TGTGCAATCGAGGACGACTACAAGCTCAGCTTT	CAIEDDYKLSF	TGCAGTGCTAGAGATCAGGATTTACTCCCCGGGGAGCTGTTTTTT	CSARDQDLLPGELFF	ALPHA_57	BETA_30	ALPHA_57-BETA_30	1	1	1	1
037_E5_62_020_PRE_CD3POS_B	0	PRE	CD4	PRE_CD4	49	1			TGTGCTGTGATTTTGGGAGGCAACAAGCTAACTTTT	CAVILGGNKLTF			ALPHA_493		ALPHA_493-NA	1			0
038_F5_62_020_POST_CD3POS_A	2	POST	CD8	POST_CD8	97	0.96	145	1	TGTGCCGTGATCGACACGGGCAGGAGAGCACTTACTTTT	CAVIDTGRRALTF	TGTGCCAGCAGCCCTGGAGCGAGCGAGACCCAGTACTTC	CASSPGASETQYF	ALPHA_248	BETA_292	ALPHA_248-BETA_292	2	3	2	2
038_F5_62_020_POST_CD3POS_C	2	POST	CD8	POST_CD8			197	1			TGTGCCAGCAGCCCTGGAGCGAGCGAGACCCAGTACTTC	CASSPGASETQYF		BETA_292	NA-BETA_292		3		0
038_F5_62_020_PRE_CD3POS_C	0	PRE	CD4	PRE_CD4	69	1	179	1	TGTGCTCTGGCGGCCGAGGGTACTAGCTATGGAAAGCTGACATTT	CALAAEGTSYGKLTF	TGTGCCAGCAGCCATGCCGGAGGGGCCTACGAGCAGTACTTC	CASSHAGGAYEQYF	ALPHA_372	BETA_253	ALPHA_372-BETA_253	1	1	1	1
040_H5_62_020_POST_CD3POS_B	0	POST	CD4	POST_CD4	134	1	153	1	TGTGCCTCCTATACTGGAGGCTTCAAAACTATCTTT	CASYTGGFKTIF	TGTGCCAGTAGTACCTACCGACTGAACTATGGCTACACCTTC	CASSTYRLNYGYTF	ALPHA_266	BETA_660	ALPHA_266-BETA_660	1	1	1	1
040_H5_62_020_PRE_CD3POS_C	1	PRE	CD8	PRE_CD8	253	0.76	178	1	TGCCTCGTGAAGGCAGGAACTGCTCTGATCTTT	CLVKAGTALIF	TGTGCCAGCAGCCGCCCTAGCGGTCCCTACAATGAGCAGTTCTTC	CASSRPSGPYNEQFF	ALPHA_27	BETA_293	ALPHA_27-BETA_293	1	1	1	1
041_A6_62_020_POST_CD3POS_B	1	POST	CD8	POST_CD8	47	0.94	18	1	TGTGCTGGGTCTTTCAGAGGCTCAACCCTGGGGAGGCTATACTTT	CAGSFRGSTLGRLYF	TGTGCCAGCAGCGCCCAGGGGGCGGGGATGAACACTGAAGCTTTCTTT	CASSAQGAGMNTEAFF	ALPHA_424	BETA_321	ALPHA_424-BETA_321	1	1	1	1
041_A6_62_020_POST_CD3POS_C	0	POST	CD4	POST_CD4	74	1	143	0.99	TGTGCAGCAAGTAATCTGGATGCAGGCAACATGCTCACCTTT	CAASNLDAGNMLTF	TGTGCCAGCAGGGGGACATGGACAGGGGAGACCGAGCAGTACTTC	CASRGTWTGETEQYF	ALPHA_149	BETA_461	ALPHA_149-BETA_461	1	1	1	1
042_B6_62_020_POST_CD3POS_B	0	POST	CD4	POST_CD4	57	1	107	1	TGTGCCGTGAACACCAATGCAGGCAAATCAACCTTT	CAVNTNAGKSTF	TGCGCCAGCAGCCCGACCGGGGGGACCCTCACCGGGGAGCTGTTTTTT	CASSPTGGTLTGELFF	ALPHA_229	BETA_120	ALPHA_229-BETA_120	1	1	1	1
042_B6_62_020_POST_CD3POS_C	0	POST	CD4	POST_CD4	104	1	87	1	TGTGCTGTGGGGCCCCTCCCCCCTATTTCTTCTGGTTCTGCAAGGCAACTGACCTTT	CAVGPLPPISSGSARQLTF	TGTGCCAGCAGCCAGGGAGCCTATGGCTACACCTTC	CASSQGAYGYTF	ALPHA_519	BETA_248	ALPHA_519-BETA_248	1	2	1	1
043_C6_62_020_POST_CD3POS_B	1	POST	CD8	POST_CD8	84	0.99	70	1	TGTGCTCTATCCCCATCTTATAACACCGACAAGCTCATCTTT	CALSPSYNTDKLIF	TGCAGTGCCATCCCTGGCGGACTAGCGGGAGACTTGGTCTATGAGCAGTTCTTC	CSAIPGGLAGDLVYEQFF	ALPHA_331	BETA_18	ALPHA_331-BETA_18	2	2	2	2
043_C6_62_020_POST_CD3POS_C	0	POST	CD4	POST_CD4	49	0.98	137	1	TGTGCTATAGGGAGGGGGGGTTACCAGAAAGTTACCTTT	CAIGRGGYQKVTF	TGCAGTGCTAGTTGGCAGGGACAAGAGACCCAGTACTTC	CSASWQGQETQYF	ALPHA_316	BETA_58	ALPHA_316-BETA_58	1	1	1	1
044_D6_62_020_POST_CD3POS_A	0	POST	CD4	POST_CD4	347	1	202	1	TGTGCTCTGAGTGATGGAACAGGAGGAAGCTACATACCTACATTT	CALSDGTGGSYIPTF	TGTGCCAGCAGCTTATCCTCGGGGGTCCCAGAGACCCAGTACTTC	CASSLSSGVPETQYF	ALPHA_362	BETA_410	ALPHA_362-BETA_410	1	1	1	1
044_D6_62_020_POST_CD3POS_B	0	POST	CD4	POST_CD4	12	1	147	1	TGTGCAGGAGCTCGGGGGACCAATAGTAAGCTGACATTT	CAGARGTNSKLTF	TGTGCCACCAGACAGGGTACCTACGAGCAGTACTTC	CATRQGTYEQYF	ALPHA_185	BETA_164	ALPHA_185-BETA_164	1	1	1	1
044_D6_62_020_POST_CD3POS_C	0	POST	CD4	POST_CD4	199	1	211	1	TGTGCCGTGAATTCAAATACTGGAGGCTTCAAAACTATCTTT	CAVNSNTGGFKTIF	TGTGCCAGCAGCTTACAGGCAGGGCCACCAGGAAACACCATATATTTT	CASSLQAGPPGNTIYF	ALPHA_238	BETA_375	ALPHA_238-BETA_375	2	2	2	2
045_E6_62_020_POST_CD3POS_A	0	POST	CD4	POST_CD4	27	1	138	0.6	TGTGCTGTGCCCAGGTCAGGAAACACACCTCTTGTCTTT	CAVPRSGNTPLVF	TGTGCCAGCAGAAACGGACAGGGCCGCAATCAGCCCCAGCATTTT	CASRNGQGRNQPQHF	ALPHA_497	BETA_199	ALPHA_497-BETA_199	1	2	1	1
045_E6_62_020_POST_CD3POS_B	0	POST	CD4	POST_CD4	114	0.97	147	1	TGTGCTGTGACTAGCAACACAGGCAAACTAATCTTT	CAVTSNTGKLIF	TGTGCCAGCTCACCAGGCCGGGATGGGGATGAGCAGTTCTTC	CASSPGRDGDEQFF	ALPHA_441	BETA_629	ALPHA_441-BETA_629	3	3	3	2
046_F6_62_020_POST_CD3POS_A	1	POST	CD8	POST_CD8	573	0.99	44	1	TGTGTGGTGAACGACTACAAGCTCAGCTTT	CVVNDYKLSF	TGTGCCAGCAGTGAAGGGCCAGAGACGTATAGCAATCAGCCCCAGCATTTT	CASSEGPETYSNQPQHF	ALPHA_602	BETA_506	ALPHA_602-BETA_506	1	1	1	1
046_F6_62_020_POST_CD3POS_B	1	POST	CD8	POST_CD8	72	1			TGTGCTCTTGGGGAACTTCACCCCCCTCCTACGGGGGGTTTCATCTTT	CALGELHPPPTGGFIF			ALPHA_388		ALPHA_388-NA	3			0
046_F6_62_020_PRE_CD3POS_B	1	PRE	CD8	PRE_CD8	54	1			TGTGCTCTTGGGGGCACATCTCTTCCTACACCACCCGGCTGGGGGATACCATCGTACACCGATAAACTCATCTTT	CALGGTSLPTPPGWGIPSYTDKLIF			ALPHA_393		ALPHA_393-NA	1			0
046_F6_62_020_PRE_CD3POS_C	1	PRE	CD8	PRE_CD8	33	1	122	1	TGTGTGCTCCACCAGGCAGGAACTGCTCTGATCTTT	CVLHQAGTALIF	TGTGCCAGCAGCGGACAGGTCAACTACGAGCAGTACTTC	CASSGQVNYEQYF	ALPHA_591	BETA_326	ALPHA_591-BETA_326	2	2	2	2
047_G6_62_020_POST_CD3POS_A	0	POST	CD4	POST_CD4	79	1	182	1	TGTGTGGTGAGACGGGGTGGCTACAATAAGCTGATTTTT	CVVRRGGYNKLIF	TGTGCCAGCAGTTGGGCGACAGGGAACACCGGGGAGCTGTTTTTT	CASSWATGNTGELFF	ALPHA_614	BETA_575	ALPHA_614-BETA_575	1	1	1	1
047_G6_62_020_POST_CD3POS_B	0	POST	CD4	POST_CD4	31	1	95	1	TGTGCTCTGAGAATTTATAACACCGACAAGCTCATCTTT	CALRIYNTDKLIF	TGTGCCAGCAGTACCCCCGGACTAGCGGCTTCCTACGAGCAGTACTTC	CASSTPGLAASYEQYF	ALPHA_338	BETA_468	ALPHA_338-BETA_468	1	1	1	1
047_G6_62_020_POST_CD3POS_C	0	POST	CD4	POST_CD4	199	1	64	1	TGTGTGGTGAACTTCATAGGCTTTGGGAATGTGCTGCATTGC	CVVNFIGFGNVLHC	TGTGCCAGCAGTTCTCCGGGACAGGGGGCGAGGAGCTATGGCTACACCTTC	CASSSPGQGARSYGYTF	ALPHA_608	BETA_573	ALPHA_608-BETA_573	1	1	1	1
047_G6_62_020_PRE_CD3POS_C	0	PRE	CD4	PRE_CD4	140	0.99	301	1	TGTGCAGCAAGCGATGAAGGAGGAAGCCAAGGAAATCTCATCTTT	CAASDEGGSQGNLIF	TGTGCCAGCTCACCAAACGGGGCTAATGAAAAACTGTTTTTT	CASSPNGANEKLFF	ALPHA_131	BETA_624	ALPHA_131-BETA_624	1	1	1	1
048_H6_62_020_POST_CD3POS_B	1	POST	CD8	POST_CD8	77	0.71	80	1	TGTGCCGCCCCCCCGGCCGACAGAGGCTCAACCCTGGGGAGGCTATACTTT	CAAPPADRGSTLGRLYF	TGTGCCAGCAGCAACAGGGTCTCGGGGGGCGGGGAGCTGTTTTTT	CASSNRVSGGGELFF	ALPHA_222	BETA_213	ALPHA_222-BETA_213	1	1	1	1
048_H6_62_020_POST_CD3POS_C	0	POST	CD4	POST_CD4			150	1			TGTGCCAGCTCACCACAATGGCGGGGTACCAGCCCTCTCGAGACCCAGTACTTC	CASSPQWRGTSPLETQYF		BETA_625	NA-BETA_625		1		0
049_A7_62_020_POST_CD3POS_A	0	POST	CD4	POST_CD4			133	1			TGTGCCAGCTCTCGAGGACTGGACGAGACGGATACGCAGTATTTT	CASSRGLDETDTQYF		BETA_646	NA-BETA_646		2		0
049_A7_62_020_POST_CD3POS_B	0	POST	CD4	POST_CD4	42	1	19	1	TGTGCTGTGAGAGATAGTGGCTACAATAAGCTGATTTTT	CAVRDSGYNKLIF	TGTGCCAGCAGGAGGGACAGGGAAGACACTGAAGCTTTCTTT	CASRRDREDTEAFF	ALPHA_451	BETA_456	ALPHA_451-BETA_456	1	1	1	1
049_A7_62_020_POST_CD3POS_C	0	POST	CD4	POST_CD4	93	1	205	1	TGTGCTGTGACAGGACAGGGAGCCCAGAAGCTGGTATTT	CAVTGQGAQKLVF	TGTGCCAGCAGCTCCGGGACAACTAACTATGGCTACACCTTC	CASSSGTTNYGYTF	ALPHA_438	BETA_356	ALPHA_438-BETA_356	1	1	1	1
049_A7_62_020_PRE_CD3POS_C	0	PRE	CD4	PRE_CD4			45	1			TGTGCCAGCAGCTTAGGGCCAGTAACATCGGTAGATACGCAGTATTTT	CASSLGPVTSVDTQYF		BETA_400	NA-BETA_400		1		0
050_B7_62_020_POST_CD3POS_C	1	POST	CD8	POST_CD8	121	1	14	1	TGTGTTGTGAGTGACGGCGGGGGAAAGCTTATCTTC	CVVSDGGGKLIF	TGTGCCAGCAGCCCCCAGGGACAGAGCAACTATGGCTACACCTTC	CASSPQGQSNYGYTF	ALPHA_637	BETA_267	ALPHA_637-BETA_267	1	1	1	1
051_C7_62_020_POST_CD3POS_A	0	POST	CD4	POST_CD4	113	1	118	1	TGTGCCGTGAGATGGAACACCGACAAGCTCATCTTT	CAVRWNTDKLIF	TGTGCCAGCAGCTTACGTCTAGCCAATGAGCAGTTCTTC	CASSLRLANEQFF	ALPHA_243	BETA_379	ALPHA_243-BETA_379	1	1	1	1
051_C7_62_020_POST_CD3POS_B	0	POST	CD4	POST_CD4	42	1	41	1	TGTGCAGGAGAGGGAGCCCAGAAGCTGGTATTT	CAGEGAQKLVF	TGCAGTGCTAGTCAGGGGGCCGGAGAGACCCAGTACTTC	CSASQGAGETQYF	ALPHA_181	BETA_56	ALPHA_181-BETA_56	1	1	1	1
051_C7_62_020_POST_CD3POS_C	1	POST	CD8	POST_CD8	174	0.92	246	0.99	TGTGTGGTGAGCGTGGGAACCTACAAATACATCTTT	CVVSVGTYKYIF	TGTGCCAGCAGCTTAGTGTCGGGAGGCCTCACAGATACGCAGTATTTT	CASSLVSGGLTDTQYF	ALPHA_623	BETA_405	ALPHA_623-BETA_405	5	6	5	2
051_C7_62_020_PRE_CD3POS_B	0	PRE	CD4	PRE_CD4	68	1	104	1	TGTGCAGCAACTCTCTTCAATGCCAGACTCATGTTT	CAATLFNARLMF	TGCAGTGCTGGACCCGGGACAGGGGGAAGTGGCTACACCTTC	CSAGPGTGGSGYTF	ALPHA_118	BETA_74	ALPHA_118-BETA_74	2	1	1	1
052_D7_62_020_POST_CD3POS_A	0	POST	CD4	POST_CD4	8	0.8	129	0.96	TGTGCTCTGAGTGAGGCGCAAACTGGGGCAAACAACCTCTTCTTT	CALSEAQTGANNLFF	TGCAGTGCTAGAGGTGGACCCAACCCGAACACTGAAGCTTTCTTT	CSARGGPNPNTEAFF	ALPHA_353	BETA_40	ALPHA_353-BETA_40	2	2	2	2
052_D7_62_020_POST_CD3POS_C	0	POST	CD4	POST_CD4	207	1	167	1	TGTGTGGTGAACATGAACACAGGCTTTCAGAAACTTGTATTT	CVVNMNTGFQKLVF	TGTGCCAGCAGCCAGGGAGCCTATGGCTACACCTTC	CASSQGAYGYTF	ALPHA_599	BETA_248	ALPHA_599-BETA_248	1	2	1	1
052_D7_62_020_PRE_CD3POS_B	0	PRE	CD4	PRE_CD4			153	0.94			TGTGCCAGCAGCTTGGACGGAATCTCCTACGAGCAGTACTTC	CASSLDGISYEQYF		BETA_426	NA-BETA_426		1		0
053_E7_62_020_POST_CD3POS_A	0	POST	CD4	POST_CD4			170	0.52			TGTGCCAGCAGAAACGGACAGGGCCGCAATCAGCCCCAGCATTTT	CASRNGQGRNQPQHF		BETA_199	NA-BETA_199		2		0
053_E7_62_020_POST_CD3POS_B	0	POST	CD4	POST_CD4	90	1	87	1	TGTGCTGGGTTGGGAACCTCAGGAACCTACAAATACATCTTT	CAGLGTSGTYKYIF	TGTGCCAGCAGCCCCGGCCCTGACAATGAGCAGTTCTTC	CASSPGPDNEQFF	ALPHA_425	BETA_272	ALPHA_425-BETA_272	1	1	1	1
053_E7_62_020_POST_CD3POS_C	0	POST	CD4	POST_CD4	14	1	25	1	TGTGCTGGGGGCACTGGAGCCAATAGTAAGCTGACATTT	CAGGTGANSKLTF	TGTGCCAGCAGCTTGGCTGGCACAGATACGCAGTATTTT	CASSLAGTDTQYF	ALPHA_420	BETA_434	ALPHA_420-BETA_434	1	1	1	1
053_E7_62_020_PRE_CD3POS_C	0	PRE	CD4	PRE_CD4			118	1			TGTGCCAGCAGCCAGGGCCCACCCAGAAACACCATATATTTT	CASSQGPPRNTIYF		BETA_249	NA-BETA_249		1		0
054_F7_62_020_POST_CD3POS_A	1	POST	CD8	POST_CD8	342	0.79	358	1	TGTGCTGTGAGGCTCGACAGAGGCTCAACCCTGGGGAGGCTATACTTT	CAVRLDRGSTLGRLYF	TGTGCCAGCAGTCCCTCGACTAGCGGGAGAACAGATACGCAGTATTTT	CASSPSTSGRTDTQYF	ALPHA_464	BETA_487	ALPHA_464-BETA_487	3	3	3	2
054_F7_62_020_POST_CD3POS_B	0	POST	CD4	POST_CD4			5	1			TGTGCCAGCAGCTTAGGAGGGGGGTCCTACGAGCAGTACTTC	CASSLGGGSYEQYF		BETA_397	NA-BETA_397		2		0
055_G7_62_020_POST_CD3POS_A	1	POST	CD8	POST_CD8	391	1	234	1	TGTGCTGTGAGGCTCGACAGAGGCTCAACCCTGGGGAGGCTATACTTT	CAVRLDRGSTLGRLYF	TGTGCCAGCAGTCCCTCGACTAGCGGGAGAACAGATACGCAGTATTTT	CASSPSTSGRTDTQYF	ALPHA_464	BETA_487	ALPHA_464-BETA_487	3	3	3	2
055_G7_62_020_POST_CD3POS_B	1	POST	CD8	POST_CD8	127	1	92	0.91	TGTGCAGCCCCTCTGAACCAGGCAGGAACTGCTCTGATCTTT	CAAPLNQAGTALIF	TGCGCCAGCAGCCTGAGACTAGCGGGAGTACGGGACAATGAGCAGTTCTTC	CASSLRLAGVRDNEQFF	ALPHA_169	BETA_129	ALPHA_169-BETA_129	1	1	1	1
055_G7_62_020_PRE_CD3POS_B	1	PRE	CD8	PRE_CD8	58	0.58	87	0.85	TGTGCAGAGAGGGTCGACTACAAGCTCAGCTTT	CAERVDYKLSF	TGTGCCAGCAGTTTACCCATAGCGGGAGCAGGCGCCGGGGAGCTGTTTTTT	CASSLPIAGAGAGELFF	ALPHA_102	BETA_582	ALPHA_102-BETA_582	3	4	3	2
055_G7_62_020_PRE_CD3POS_C	0	PRE	CD4	PRE_CD4	78	1	166	1	TGTGTGGTGGACGGCCGGGGAAGCCAAGGAAATCTCATCTTT	CVVDGRGSQGNLIF	TGCGCCAGCAGTGAGAACCAGGTCACCGGGGAGCTGTTTTTT	CASSENQVTGELFF	ALPHA_626	BETA_152	ALPHA_626-BETA_152	1	1	1	1
057_A8_62_020_POST_CD3POS_B	1	POST	CD8	POST_CD8	56	0.98			TGTGCTCTTGGGGTCCTCCTTCAACCCACCACCGATAAACTCATCTTT	CALGVLLQPTTDKLIF			ALPHA_394		ALPHA_394-NA	1			0
058_B8_62_020_POST_CD3POS_A	1	POST	CD8	POST_CD8	119	0.96	24	1	TGTGCAGTCCCCAGGTGGGGAAATGAGAAATTAACCTTT	CAVPRWGNEKLTF	TGTGCCAGCAGTGTCGGTTCCACAGATACGCAGTATTTT	CASSVGSTDTQYF	ALPHA_203	BETA_535	ALPHA_203-BETA_535	1	1	1	1
058_B8_62_020_POST_CD3POS_B	1	POST	CD8	POST_CD8	23	1	97	1	TGTGTTCATAATGCAGGCAACATGCTCACCTTT	CVHNAGNMLTF	TGTGCCAGCACCGACGTAACCAGGGGTTTAAGCACTGAAGCTTTCTTT	CASTDVTRGLSTEAFF	ALPHA_629	BETA_192	ALPHA_629-BETA_192	1	1	1	1
058_B8_62_020_POST_CD3POS_C	1	POST	CD8	POST_CD8	198	0.82	303	1	TGTGTGGTGAGCGTGGGAACCTACAAATACATCTTT	CVVSVGTYKYIF	TGTGCCAGCAGCTTAGTGTCGGGAGGCCTCACAGATACGCAGTATTTT	CASSLVSGGLTDTQYF	ALPHA_623	BETA_405	ALPHA_623-BETA_405	5	6	5	2
058_B8_62_020_PRE_CD3POS_B	1	PRE	CD8	PRE_CD8	66	1	41	1	TGCCTCGTGGGTGACTTCTTTTCTGGTGGCTACAATAAGCTGATTTTT	CLVGDFFSGGYNKLIF	TGCAGTGCTAAGGCAGGGGCATTGCAAGAGACCCAGTACTTC	CSAKAGALQETQYF	ALPHA_33	BETA_23	ALPHA_33-BETA_23	2	1	1	1
059_C8_62_020_POST_CD3POS_A	0	POST	CD4	POST_CD4	128	0.96	8	1	TGCGCTGTGAGAGTCACGAGACTCATGTTT	CAVRVTRLMF	TGTGCCACCAGTGATTCCCGACTAGCGGGGGGGGTAGAGACCCAGTACTTC	CATSDSRLAGGVETQYF	ALPHA_42	BETA_176	ALPHA_42-BETA_176	1	1	1	1
059_C8_62_020_POST_CD3POS_C	1	POST	CD8	POST_CD8	93	1	88	1	TGTGCAGCAAGATCTCATCAGGGCGGATCTGAAAAGCTGGTCTTT	CAARSHQGGSEKLVF	TGCGCCAGCAGCCAACGGGCCGCGAGGTACGAGCAGTACTTC	CASSQRAARYEQYF	ALPHA_122	BETA_93	ALPHA_122-BETA_93	2	2	2	2
059_C8_62_020_PRE_CD3POS_B	0	PRE	CD4	PRE_CD4	15	1	50	1	TGTGCTCTGAGTGGGAACACATACTCTGGGGCTGGGAGTTACCAACTCACTTTC	CALSGNTYSGAGSYQLTF	TGTGCCAGCAGTTTACGAGACAGTGGGAACATTCAGTACTTC	CASSLRDSGNIQYF	ALPHA_363	BETA_584	ALPHA_363-BETA_584	1	1	1	1
060_D8_62_020_POST_CD3POS_A	0	POST	CD4	POST_CD4			370	0.99			TGTGCCAGCTCTCGAGGACTGGACGAGACGGATACGCAGTATTTT	CASSRGLDETDTQYF		BETA_646	NA-BETA_646		2		0
060_D8_62_020_PRE_CD3POS_C	2	PRE	CD8	PRE_CD8	207	1	254	1	TGTGCAGCCCTGAACACAGGCTTTCAGAAACTTGTATTT	CAALNTGFQKLVF	TGTGCCAGCAGCCAAGATCGGCGGGAGGGTCCCTACAATGAGCAGTTCTTC	CASSQDRREGPYNEQFF	ALPHA_170	BETA_235	ALPHA_170-BETA_235	2	3	2	2
061_E8_62_020_POST_CD3POS_B	0	POST	CD4	POST_CD4	30	1	42	0.95	TGTGTGGTGACCATCTTTTCTGGTTCTGCAAGGCAACTGACCTTT	CVVTIFSGSARQLTF	TGCGCCAGCAGCCCCCAAAATAGGGCCAACGTCCTGACTTTC	CASSPQNRANVLTF	ALPHA_612	BETA_116	ALPHA_612-BETA_116	1	1	1	1
061_E8_62_020_PRE_CD3POS_C	0	PRE	CD4	PRE_CD4	485	1			TGTGCTGCATATAACTATGGTCAGAATTTTGTCTTT	CAAYNYGQNFVF			ALPHA_398		ALPHA_398-NA	1			0
062_F8_62_020_POST_CD3POS_A	0	POST	CD4	POST_CD4	99	1	209	1	TGTGCTGTGACTGGGGCTGGGAGTTACCAACTCACTTTC	CAVTGAGSYQLTF	TGCAGTGCTCTGATCGGGGGGAGGGACACTGAAGCTTTCTTT	CSALIGGRDTEAFF	ALPHA_442	BETA_70	ALPHA_442-BETA_70	3	3	3	2
062_F8_62_020_POST_CD3POS_B	1	POST	CD8	POST_CD8			136	1			TGTGCCAGCAGTTTCGTAGTCTCTGGGGCCAACGTCCTGACTTTC	CASSFVVSGANVLTF		BETA_597	NA-BETA_597		1		0
062_F8_62_020_POST_CD3POS_C	0	POST	CD4	POST_CD4	163	1	48	1	TGTGCTGTGAGTGAAAGAGGATACAGCACCCTCACCTTT	CAVSERGYSTLTF	TGTGCCAGCAGCCCGGGACAGGGAATAGACTATGGCTACACCTTC	CASSPGQGIDYGYTF	ALPHA_473	BETA_284	ALPHA_473-BETA_284	1	1	1	1
062_F8_62_020_PRE_CD3POS_C	0	PRE	CD4	PRE_CD4			43	1			TGTGCCAGCTCACCACCAGGGCGGGGGGGGAGCAATCAGCCCCAGCATTTT	CASSPPGRGGSNQPQHF		BETA_626	NA-BETA_626		1		0
063_G8_62_020_POST_CD3POS_B	1	POST	CD8	POST_CD8	54	1	391	1	TGTGCAGCAAGATCTCATCAGGGCGGATCTGAAAAGCTGGTCTTT	CAARSHQGGSEKLVF	TGCGCCAGCAGCCAACGGGCCGCGAGGTACGAGCAGTACTTC	CASSQRAARYEQYF	ALPHA_122	BETA_93	ALPHA_122-BETA_93	2	2	2	2
063_G8_62_020_PRE_CD3POS_B	0	PRE	CD4	PRE_CD4			81	1			TGTGCCAGCAGCCAAGAACAGGAGATTGCCGGGGAGCTGTTTTTT	CASSQEQEIAGELFF		BETA_224	NA-BETA_224		1		0
063_G8_62_020_PRE_CD3POS_C	0	PRE	CD4	PRE_CD4	34	1	296	1	TGTGCCGTGAACCCGAATAGTGGAGGTAGCAACTATAAACTGACATTT	CAVNPNSGGSNYKLTF	TGTGCCAGCAGCGTAGCCGCGAACGGTGAAGCTTTCTTT	CASSVAANGEAFF	ALPHA_233	BETA_335	ALPHA_233-BETA_335	1	1	1	1
064_H8_62_020_POST_CD3POS_A	1	POST	CD8	POST_CD8			163	0.92			TGCGCCAGCCGGCCCCAGGGGGCCATGGAGACCCAGTACTTC	CASRPQGAMETQYF		BETA_156	NA-BETA_156		1		0
064_H8_62_020_POST_CD3POS_C	0	POST	CD4	POST_CD4	111	1	425	1	TGTGCTGGGCCCCAATTTAAATATGGAAACAAACTGGTCTTT	CAGPQFKYGNKLVF	TGTGCCAGCAGTCAACAGGGTCACACGCAGTATTTT	CASSQQGHTQYF	ALPHA_416	BETA_475	ALPHA_416-BETA_475	1	1	1	1
065_A9_62_020_POST_CD3POS_C	0	POST	CD4	POST_CD4			31	1			TGTGCCAGTAGGGGGGCCGGGGCCCAACAAGAGACCCAGTACTTC	CASRGAGAQQETQYF		BETA_657	NA-BETA_657		1		0
065_A9_62_020_PRE_CD3POS_C	0	PRE	CD4	PRE_CD4			633	1			TGTGCCAGCGGGACCGGGACAGGGAACTATGGCTACACCTTC	CASGTGTGNYGYTF		BETA_620	NA-BETA_620		1		0
066_B9_62_020_POST_CD3POS_B	1	POST	CD8	POST_CD8			90	1			TGTGCCAGCAGCTTTGCTTCGGGGACGCAAGAGACCCAGTACTTC	CASSFASGTQETQYF		BETA_450	NA-BETA_450		12		0
066_B9_62_020_POST_CD3POS_C	1	POST	CD8	POST_CD8	27	0.93			TGTGCTCTTGGGGAACTTCACCCCCCTCCTACGGGGGGTTTCATCTTT	CALGELHPPPTGGFIF			ALPHA_388		ALPHA_388-NA	3			0
066_B9_62_020_PRE_CD3POS_B	1	PRE	CD8	PRE_CD8	55	1	27	1	TGTGTGGAATCAGGAGGAGGTGCTGACGGACTCACCTTT	CVESGGGADGLTF	TGTGCCAGCGCAATCTGGACAGGGGTGGATCAGCCCCAGCATTTT	CASAIWTGVDQPQHF	ALPHA_592	BETA_617	ALPHA_592-BETA_617	3	3	3	2
067_C9_62_020_POST_CD3POS_C	0	POST	CD4	POST_CD4	54	1			TGTGCTTTCATGAAACCCTCAACGGGTAACCAGTTCTATTTT	CAFMKPSTGNQFYF			ALPHA_570		ALPHA_570-NA	1			0
067_C9_62_020_PRE_CD3POS_B	0	PRE	CD4	PRE_CD4			12	1			TGTGCCAGCAGTCCCCGGACAGGGGGCCACGAGCAGTACTTC	CASSPRTGGHEQYF		BETA_483	NA-BETA_483		1		0
068_D9_62_020_POST_CD3POS_B	2	POST	CD8	POST_CD8	21	0.95	57	1	TGTGCTGTGAGAGACTTGGGTGACATGCGCTTT	CAVRDLGDMRF	TGTGCCAGTAGTTTGACCTACAATAGCAATCAGCCCCAGCATTTT	CASSLTYNSNQPQHF	ALPHA_449	BETA_677	ALPHA_449-BETA_677	1	1	1	1
069_E9_62_020_POST_CD3POS_B	1	POST	CD8	POST_CD8	71	1			TGTGCTCTTGGGGAACTTCACCCCCCTCCTACGGGGGGTTTCATCTTT	CALGELHPPPTGGFIF			ALPHA_388		ALPHA_388-NA	3			0
069_E9_62_020_PRE_CD3POS_C	0	PRE	CD4	PRE_CD4	48	1	133	1	TGTGCTTATCAGGGAGCCCAGAAGCTGGTATTT	CAYQGAQKLVF	TGTGCCAGCAGCTTGTCAGCGGGGGGGTACAATGAGCAGTTCTTC	CASSLSAGGYNEQFF	ALPHA_562	BETA_442	ALPHA_562-BETA_442	1	1	1	1
070_F9_62_020_POST_CD3POS_A	1	POST	CD8	POST_CD8	24	1	66	1	TGTGCCCTCATGGACACGGGCAGGAGAGCACTTACTTTT	CALMDTGRRALTF	TGTGCCAGCAGTTTTGGGTCGCAAGAGACCCAGTACTTC	CASSFGSQETQYF	ALPHA_215	BETA_607	ALPHA_215-BETA_607	2	2	2	2
070_F9_62_020_POST_CD3POS_B	0	POST	CD4	POST_CD4	30	1	185	1	TGCATCGTCAGAGTCGGGTCGGATAACAATGCCAGACTCATGTTT	CIVRVGSDNNARLMF	TGCAGTGCTCCTGACCTCACCTCCCTCTCCTACGAGCAGTACTTC	CSAPDLTSLSYEQYF	ALPHA_22	BETA_68	ALPHA_22-BETA_68	1	1	1	1
070_F9_62_020_POST_CD3POS_C	1	POST	CD8	POST_CD8	20	1	164	1	TGTGCACGCGGGGGGGGAAACACACCTCTTGTCTTT	CARGGGNTPLVF	TGTGCCAGCAAAGGGACTGCCTCTAGAAATGAGCAGTTCTTC	CASKGTASRNEQFF	ALPHA_86	BETA_185	ALPHA_86-BETA_185	2	2	2	2
070_F9_62_020_PRE_CD3POS_C	0	PRE	CD4	PRE_CD4	46	1	240	1	TGTGCCGTGAATTCAAATACTGGAGGCTTCAAAACTATCTTT	CAVNSNTGGFKTIF	TGTGCCAGCAGCTTACAGGCAGGGCCACCAGGAAACACCATATATTTT	CASSLQAGPPGNTIYF	ALPHA_238	BETA_375	ALPHA_238-BETA_375	2	2	2	2
071_G9_62_020_POST_CD3POS_B	1	POST	CD8	POST_CD8	27	1	67	1	TGTGCTCTCAAGAACTCAAATTCCGGGTATGCACTCAACTTC	CALKNSNSGYALNF	TGTGCCAGCAGCTTTGCTTCGGGGACGCAAGAGACCCAGTACTTC	CASSFASGTQETQYF	ALPHA_332	BETA_450	ALPHA_332-BETA_450	7	12	7	2
071_G9_62_020_PRE_CD3POS_B	0	PRE	CD4	PRE_CD4	125	1			TGCCTCGTGGGTGACTTCTTTTCTGGTGGCTACAATAAGCTGATTTTT	CLVGDFFSGGYNKLIF			ALPHA_33		ALPHA_33-NA	2			0
071_G9_62_020_PRE_CD3POS_C	1	PRE	CD8	PRE_CD8	105	1	204	0.99	TGTGCTCTGAGTGTACGGGATAGCAACTATCAGTTAATCTGG	CALSVRDSNYQLIW	TGTGCCAGCAGCTTAACAACCGTGAGCACTGAAGCTTTCTTT	CASSLTTVSTEAFF	ALPHA_366	BETA_367	ALPHA_366-BETA_367	1	1	1	1
072_H9_62_020_POST_CD3POS_A	1	POST	CD8	POST_CD8	168	1	90	1	TGTGCTACGGACGAAGACAGAGGCTCAACCCTGGGGAGGCTATACTTT	CATDEDRGSTLGRLYF	TGTGCCAGCACCGGGAGGACTAGCGGCACAGATACGCAGTATTTT	CASTGRTSGTDTQYF	ALPHA_305	BETA_193	ALPHA_305-BETA_193	2	2	2	2
072_H9_62_020_POST_CD3POS_C	1	POST	CD8	POST_CD8	123	0.73	148	1	TGTGTGGTGAGCGTGGGAACCTACAAATACATCTTT	CVVSVGTYKYIF	TGTGCCAGCAGCTTAGTGTCGGGAGGCCTCACAGATACGCAGTATTTT	CASSLVSGGLTDTQYF	ALPHA_623	BETA_405	ALPHA_623-BETA_405	5	6	5	2
073_A10_62_020_POST_CD3POS_A	1	POST	CD8	POST_CD8	57	1	30	1	TGTGCAATAAGGACTGGTGGCTACAATAAGCTGATTTTT	CAIRTGGYNKLIF	TGTGCCAGCAGTGAAGGGCAGGGTTACGAGCAGTACTTC	CASSEGQGYEQYF	ALPHA_56	BETA_505	ALPHA_56-BETA_505	2	2	2	2
073_A10_62_020_POST_CD3POS_C	0	POST	CD4	POST_CD4	97	1	85	1	TGTGCTCTGAGTCCGCTTAACGACTACAAGCTCAGCTTT	CALSPLNDYKLSF	TGTGCCACCCGACAGGGTCGGAACACCGGGGAGCTGTTTTTT	CATRQGRNTGELFF	ALPHA_344	BETA_179	ALPHA_344-BETA_179	1	1	1	1
073_A10_62_020_PRE_CD3POS_B	0	PRE	CD4	PRE_CD4			210	1			TGTGCCAGCAGCCCCGGGTTCTATAACCAAGAGACCCAGTACTTC	CASSPGFYNQETQYF		BETA_277	NA-BETA_277		1		0
073_A10_62_020_PRE_CD3POS_C	0	PRE	CD4	PRE_CD4	195	1	509	1	TGTGTGGTGAACGGGATCGACACCGGTAACCAGTTCTATTTT	CVVNGIDTGNQFYF	TGTGCCAGCAGTTCGCTAGCGGGAGGCAGGGAGACCCAGTACTTC	CASSSLAGGRETQYF	ALPHA_606	BETA_571	ALPHA_606-BETA_571	1	1	1	1
074_B10_62_020_POST_CD3POS_A	0	POST	CD4	POST_CD4			40	1			TGCGCCAGCAGCCAAGCGGCGGGAGTCGGTACAGATACGCAGTATTTT	CASSQAAGVGTDTQYF		BETA_104	NA-BETA_104		1		0
074_B10_62_020_POST_CD3POS_B	2	POST	CD8	POST_CD8			494	1			TGCGCCAGCAGCTTGGAATGGGGAGGCACTGAAGCTTTCTTT	CASSLEWGGTEAFF		BETA_139	NA-BETA_139		1		0
074_B10_62_020_POST_CD3POS_C	0	POST	CD4	POST_CD4	52	0.96	83	1	TGTGCTGTGACTAGCAACACAGGCAAACTAATCTTT	CAVTSNTGKLIF	TGTGCCAGCTCACCAGGCCGGGATGGGGATGAGCAGTTCTTC	CASSPGRDGDEQFF	ALPHA_441	BETA_629	ALPHA_441-BETA_629	3	3	3	2
074_B10_62_020_PRE_CD3POS_B	0	PRE	CD4	PRE_CD4	35	1	92	0.99	TGTGCTCTGAGTGTTAATTCCGGGTATGCACTCAACTTC	CALSVNSGYALNF	TGTGCCAGCAGCGACGACGGCGGACAGGGGGGCACAGATACGCAGTATTTT	CASSDDGGQGGTDTQYF	ALPHA_368	BETA_315	ALPHA_368-BETA_315	1	1	1	1
074_B10_62_020_PRE_CD3POS_C	0	PRE	CD4	PRE_CD4			206	0.91			TGCGCCAGCAGCTTTTTAGGTGCCTACGACGAGCAGTACTTC	CASSFLGAYDEQYF		BETA_149	NA-BETA_149		1		0
075_C10_62_020_POST_CD3POS_A	0	POST	CD4	POST_CD4			31	0.94			TGTGCCAGCAGCTACGGGGGCCCGACCTACGAGCAGTACTTC	CASSYGGPTYEQYF		BETA_343	NA-BETA_343		1		0
075_C10_62_020_POST_CD3POS_B	0	POST	CD4	POST_CD4	64	1	23	1	TGTGTGGTGAGCGCTTGGACCTCAGGAACCTACAAATACATCTTT	CVVSAWTSGTYKYIF	TGTGCCAGCAGTCCGCGGCTGTTACGGGTCGAGCAGTACTTC	CASSPRLLRVEQYF	ALPHA_622	BETA_489	ALPHA_622-BETA_489	1	1	1	1
075_C10_62_020_POST_CD3POS_C	1	POST	CD8	POST_CD8	52	1	102	1	TGTGCAATAAGGACTGGTGGCTACAATAAGCTGATTTTT	CAIRTGGYNKLIF	TGTGCCAGCAGTGAAGGGCAGGGTTACGAGCAGTACTTC	CASSEGQGYEQYF	ALPHA_56	BETA_505	ALPHA_56-BETA_505	2	2	2	2
076_D10_62_020_POST_CD3POS_A	0	POST	CD4	POST_CD4	19	0.56	29	1	TGTGCCCCAAGCGGGGGGGATAGCAGCTATAAATTGATCTTC	CAPSGGDSSYKLIF	TGTGCCAGCAGTGAAGGACTAGCGGATACAGATACGCAGTATTTT	CASSEGLADTDTQYF	ALPHA_212	BETA_504	ALPHA_212-BETA_504	1	1	1	1
076_D10_62_020_POST_CD3POS_B	2	POST	CD8	POST_CD8	30	1	30	1	TGTGCTGTGCACCCCTGGGAAACCAGTGGCTCTAGGTTGACCTTT	CAVHPWETSGSRLTF	TGTGCCAGCAGTGACAGCGCTAGGGGGCACAATGAGCAGTTCTTC	CASSDSARGHNEQFF	ALPHA_494	BETA_514	ALPHA_494-BETA_514	1	1	1	1
076_D10_62_020_POST_CD3POS_C	0	POST	CD4	POST_CD4	180	1			TGTGCTCTGAGTGATCTAGGCTTTGGGAATGTGCTGCATTGC	CALSDLGFGNVLHC			ALPHA_360		ALPHA_360-NA	1			0
077_E10_62_020_POST_CD3POS_A	0	POST	CD4	POST_CD4	40	0.52	234	0.95	TTTCGCTGGGGCTTTCAGAAACTTGTATTT	FRWGFQKLVF	TGCAGTGCTAGAGTCCCCCCTATAAGCGGGGGGATCTACAATGAGCAGTTCTTC	CSARVPPISGGIYNEQFF	ALPHA_643	BETA_41	ALPHA_643-BETA_41	1	1	1	1
077_E10_62_020_POST_CD3POS_B	0	POST	CD4	POST_CD4	30	1	70	1	TGTGCTGTGAGAGAAGACTCTGGGGCTGGGAGTTACCAACTCACTTTC	CAVREDSGAGSYQLTF	TGTGCCAGCAGTCACAGACAGGGGTACCAAGAGACCCAGTACTTC	CASSHRQGYQETQYF	ALPHA_444	BETA_476	ALPHA_444-BETA_476	1	1	1	1
077_E10_62_020_PRE_CD3POS_B	1	PRE	CD8	PRE_CD8	23	1	15	1	TGTGTGGAATCAGGAGGAGGTGCTGACGGACTCACCTTT	CVESGGGADGLTF	TGTGCCAGCGCAATCTGGACAGGGGTGGATCAGCCCCAGCATTTT	CASAIWTGVDQPQHF	ALPHA_592	BETA_617	ALPHA_592-BETA_617	3	3	3	2
078_F10_62_020_POST_CD3POS_B	0	POST	CD4	POST_CD4	105	1	60	1	TGTGTTGTGACCGAAATTCAGGGAGCCCAGAAGCTGGTATTT	CVVTEIQGAQKLVF	TGTGCCAGCAGCTTAGGAGGGGGGTCCTACGAGCAGTACTTC	CASSLGGGSYEQYF	ALPHA_631	BETA_397	ALPHA_631-BETA_397	1	2	1	1
079_G10_62_020_POST_CD3POS_A	1	POST	CD8	POST_CD8	99	1	90	1	TGTGCAATGAGCCCCTCGAATAACAATGACATGCGCTTT	CAMSPSNNNDMRF	TGCGCCAGCAGCCTGAGACCGGGACTAGCGGGAGTAGAGACCGGGGAGCTGTTTTTT	CASSLRPGLAGVETGELFF	ALPHA_68	BETA_128	ALPHA_68-BETA_128	1	1	1	1
079_G10_62_020_POST_CD3POS_B	1	POST	CD8	POST_CD8	95	1	244	0.99	TGTGCAGTGGGGGGGGATAGCAGCTATAAATTGATCTTC	CAVGGDSSYKLIF	TGTGCCAGCAGTCCCTTCGGGGGGGGTTATGGTGAGCAGTTCTTC	CASSPFGGGYGEQFF	ALPHA_206	BETA_488	ALPHA_206-BETA_488	1	1	1	1
079_G10_62_020_POST_CD3POS_C	1	POST	CD8	POST_CD8	34	1	71	1	TGTGTGGTGAGCCCCCGTCGGGACTTTGGAAATGAGAAATTAACCTTT	CVVSPRRDFGNEKLTF	TGTGCCAGCAGCTTCGGGACAGACAACAATGAGCAGTTCTTC	CASSFGTDNNEQFF	ALPHA_618	BETA_418	ALPHA_618-BETA_418	5	5	5	2
079_G10_62_020_PRE_CD3POS_C	0	PRE	CD4	PRE_CD4	149	1	367	1	TGTGTGGTGAGCGCGTATTCAGGAGGAGGTGCTGACGGACTCACCTTT	CVVSAYSGGGADGLTF	TGTGCCAGCAGCCTGGGCTGGACGGCGGGAGGGATCTACGAGCAGTACTTC	CASSLGWTAGGIYEQYF	ALPHA_621	BETA_309	ALPHA_621-BETA_309	1	1	1	1
080_H10_62_020_POST_CD3POS_A	1	POST	CD8	POST_CD8	19	1	19	1	TGTGCAGCAACCATCCATAACAATGACATGCGCTTT	CAATIHNNDMRF	TGTGCCAGCAGTTTTGCCGGACAGCTCTACGAGCAGTACTTC	CASSFAGQLYEQYF	ALPHA_115	BETA_604	ALPHA_115-BETA_604	1	1	1	1
080_H10_62_020_POST_CD3POS_C	0	POST	CD4	POST_CD4	97	1			TGTGCAGCAACTCTCTTCAATGCCAGACTCATGTTT	CAATLFNARLMF			ALPHA_118		ALPHA_118-NA	2			0
080_H10_62_020_PRE_CD3POS_C	0	PRE	CD4	PRE_CD4	33	1	102	1	TGCCTCGTGGGTGACTCTGGGGCTGGGAGTTACCAACTCACTTTC	CLVGDSGAGSYQLTF	TGCAGTGCTTGGGGTGTTTGGTTGGGTAATGAAAAACTGTTTTTT	CSAWGVWLGNEKLFF	ALPHA_32	BETA_77	ALPHA_32-BETA_77	1	1	1	1
081_A11_62_020_POST_CD3POS_A	0	POST	CD4	POST_CD4	232	0.67	12	1	TGTGCTGTCCACTATGGGAACAACAGACTCGCTTTT	CAVHYGNNRLAF	TGTGCCAGCAGTGAACTAGCGGGGGGGCAAGAGACCCAGTACTTC	CASSELAGGQETQYF	ALPHA_431	BETA_500	ALPHA_431-BETA_500	1	1	1	1
081_A11_62_020_POST_CD3POS_B	0	POST	CD4	POST_CD4	71	1	402	1	TGTGCAATGCTGGATTCTGGGGGTTACCAGAAAGTTACCTTT	CAMLDSGGYQKVTF	TGCGCCAGCAGCTTGGCTGGTTTTGGCAGGGGGAGCACTGAAGCTTTCTTT	CASSLAGFGRGSTEAFF	ALPHA_75	BETA_143	ALPHA_75-BETA_143	1	1	1	1
081_A11_62_020_POST_CD3POS_C	1	POST	CD8	POST_CD8	51	1	171	1	TGTGTGGTGAGCGTGGGAACCTACAAATACATCTTT	CVVSVGTYKYIF	TGTGCCAGCAGCTTAGTGTCGGGAGGCCTCACAGATACGCAGTATTTT	CASSLVSGGLTDTQYF	ALPHA_623	BETA_405	ALPHA_623-BETA_405	5	6	5	2
081_A11_62_020_PRE_CD3POS_B	0	PRE	CD4	PRE_CD4	36	0.92	318	1	TGTGCCGTGAACATGGAGTGGTCGGAAACCTCCTACGACAAGGTGATATTT	CAVNMEWSETSYDKVIF	TGCGCCAGCAGTTCAGGTTCCCTCGAGCAGTACTTC	CASSSGSLEQYF	ALPHA_231	BETA_153	ALPHA_231-BETA_153	1	1	1	1
081_A11_62_020_PRE_CD3POS_C	0	PRE	CD4	PRE_CD4	137	1	249	0.7	TGTGCAACTGCGACCGGTAACCAGTTCTATTTT	CATATGNQFYF	TGTGCCAGCAGTTTGGCGGCGAACACTGAAGCTTTCTTT	CASSLAANTEAFF	ALPHA_55	BETA_601	ALPHA_55-BETA_601	1	1	1	1
082_B11_62_020_POST_CD3POS_A	1	POST	CD8	POST_CD8			156	1			TGTGCCAGCAGCTTTGCTTCGGGGACGCAAGAGACCCAGTACTTC	CASSFASGTQETQYF		BETA_450	NA-BETA_450		12		0
082_B11_62_020_PRE_CD3POS_B	0	PRE	CD4	PRE_CD4			35	1			TGTGCCAGCAGCCCTCTGACAGGGGTCAATTCACCCCTCCACTTT	CASSPLTGVNSPLHF		BETA_290	NA-BETA_290		1		0
082_B11_62_020_PRE_CD3POS_C	0	PRE	CD4	PRE_CD4			775	1			TGCGCCAGCACCCAGACTAGCGCGTCAGATACGCAGTATTTT	CASTQTSASDTQYF		BETA_81	NA-BETA_81		1		0
083_C11_62_020_POST_CD3POS_A	1	POST	CD8	POST_CD8	184	0.93	296	1	TGTGCTACGGACGAAGACAGAGGCTCAACCCTGGGGAGGCTATACTTT	CATDEDRGSTLGRLYF	TGTGCCAGCACCGGGAGGACTAGCGGCACAGATACGCAGTATTTT	CASTGRTSGTDTQYF	ALPHA_305	BETA_193	ALPHA_305-BETA_193	2	2	2	2
083_C11_62_020_PRE_CD3POS_B	0	PRE	CD4	PRE_CD4	15	1	50	1	TGTGCCGTGAATGCTCCGTACAGCAGTGCTTCCAAGATAATCTTT	CAVNAPYSSASKIIF	TGTGCCAGTAGTATGCCCCCCGGGACACCAACTGGGACAGATACGCAGTATTTT	CASSMPPGTPTGTDTQYF	ALPHA_237	BETA_666	ALPHA_237-BETA_666	1	1	1	1
085_E11_62_020_POST_CD3POS_A	1	POST	CD8	POST_CD8	120	1	120	1	TGTGCTGTCGTCTGTAATGCAGGCAACATGCTCACCTTT	CAVVCNAGNMLTF	TGTGCCAGCAGCATGTGGACAGGAGTCAATGAGCAGTTCTTC	CASSMWTGVNEQFF	ALPHA_433	BETA_220	ALPHA_433-BETA_220	2	2	2	2
086_F11_62_020_POST_CD3POS_A	0	POST	CD4	POST_CD4	7	1	43	1	TGTGCTGTGGAAAAGGACTACAAGCTCAGCTTT	CAVEKDYKLSF	TGTGCCAGCAGCTTAGATGGGAGCGGGGGGGCCCCAGATACGCAGTATTTT	CASSLDGSGGAPDTQYF	ALPHA_502	BETA_385	ALPHA_502-BETA_385	2	2	2	2
086_F11_62_020_POST_CD3POS_B	1	POST	CD8	POST_CD8	121	1	228	1	TGTGCCGTGATCGACACGGGCAGGAGAGCACTTACTTTT	CAVIDTGRRALTF	TGTGCCAGCAGCCCTGGAGCGAGCGAGACCCAGTACTTC	CASSPGASETQYF	ALPHA_248	BETA_292	ALPHA_248-BETA_292	2	3	2	2
086_F11_62_020_POST_CD3POS_C	1	POST	CD8	POST_CD8	361	0.88	74	1	TGTGCTGTGAGGCTCGACAGAGGCTCAACCCTGGGGAGGCTATACTTT	CAVRLDRGSTLGRLYF	TGTGCCAGCAGTCCCTCGACTAGCGGGAGAACAGATACGCAGTATTTT	CASSPSTSGRTDTQYF	ALPHA_464	BETA_487	ALPHA_464-BETA_487	3	3	3	2
086_F11_62_020_PRE_CD3POS_C	0	PRE	CD4	PRE_CD4	17	0.94	53	1	TGTGCAGCAAGGAAGGTCTCAGGAACCTACAAATACATCTTT	CAARKVSGTYKYIF	TGTGCCAGCAGCCCGCCGGGGGGGGGCAATCAGCCCCAGCATTTT	CASSPPGGGNQPQHF	ALPHA_143	BETA_278	ALPHA_143-BETA_278	1	1	1	1
087_G11_62_020_POST_CD3POS_B	1	POST	CD8	POST_CD8	119	1	95	1	TGTGCTACGGACTCCGACAGAGGCTCAACCCTGGGGAGGCTATACTTT	CATDSDRGSTLGRLYF	TGTGCCAGCAGCGGCCGTGTGGGCGGCACAGATACGCAGTATTTT	CASSGRVGGTDTQYF	ALPHA_310	BETA_330	ALPHA_310-BETA_330	2	2	2	2
087_G11_62_020_PRE_CD3POS_C	0	PRE	CD4	PRE_CD4			71	1			TGTGCCAGCAGTTCAGGGGGCGTCCGTCGGGATACGCAGTATTTT	CASSSGGVRRDTQYF		BETA_564	NA-BETA_564		1		0
090_B12_62_020_POST_CD3POS_C	0	POST	CD4	POST_CD4			15	1			TGTGCCAGCAGCCCCGGGGACGCGGGGGCGGGGGAGACCCAGTACTTC	CASSPGDAGAGETQYF		BETA_275	NA-BETA_275		1		0
092_D12_62_020_POST_CD3POS_B	1	POST	CD8	POST_CD8	51	1	88	1	TGTGCTCTCAAGAACTCAAATTCCGGGTATGCACTCAACTTC	CALKNSNSGYALNF	TGTGCCAGCAGCTTTGCTTCGGGGACGCAAGAGACCCAGTACTTC	CASSFASGTQETQYF	ALPHA_332	BETA_450	ALPHA_332-BETA_450	7	12	7	2
092_D12_62_020_POST_CD3POS_C	0	POST	CD4	POST_CD4	159	0.99	151	0.96	TGTGCAGAGAATATTAACGAAGGAGGAAGCTACATACCTACATTT	CAENINEGGSYIPTF	TGTGCCAGCAGCCTGCGACACCGCTTCCAAGAGACCCAGTACTTC	CASSLRHRFQETQYF	ALPHA_96	BETA_308	ALPHA_96-BETA_308	2	2	2	2
093_E12_62_020_POST_CD3POS_A	1	POST	CD8	POST_CD8	67	1	71	0.85	TGTGCAGAGAGTTACGGTCAGAATTTTGTCTTT	CAESYGQNFVF	TGTGCCAGCAGCGTTAGGCCCGGGACAGGGGACATGAACACTGAAGCTTTCTTT	CASSVRPGTGDMNTEAFF	ALPHA_106	BETA_342	ALPHA_106-BETA_342	1	1	1	1
093_E12_62_020_POST_CD3POS_C	1	POST	CD8	POST_CD8	36	1	31	1	TGTGTGGTGAGCCCCCGTCGGGACTTTGGAAATGAGAAATTAACCTTT	CVVSPRRDFGNEKLTF	TGTGCCAGCAGCTTCGGGACAGACAACAATGAGCAGTTCTTC	CASSFGTDNNEQFF	ALPHA_618	BETA_418	ALPHA_618-BETA_418	5	5	5	2
093_E12_62_020_PRE_CD3POS_B	0	PRE	CD4	PRE_CD4	111	1	28	1	TGTGCAGAGAGTCCCGTGTCGAACACCGACAAGCTCATCTTT	CAESPVSNTDKLIF	TGTGCCAGCACCCAAAGCGGGAAGTGGGGGGAGCTGTTTTTT	CASTQSGKWGELFF	ALPHA_105	BETA_188	ALPHA_105-BETA_188	2	2	2	2
094_F12_62_020_POST_CD3POS_A	1	POST	CD8	POST_CD8	117	1	81	1	TGTGCTACGGACGAGGACAGAGGCTCAACCCTGGGGAGGCTATACTTT	CATDEDRGSTLGRLYF	TGTGCCAGCAGTCCCAAGACTAGCGGGAGAGATACGCAGTATTTT	CASSPKTSGRDTQYF	ALPHA_306	BETA_480	ALPHA_306-BETA_480	1	1	1	1
094_F12_62_020_POST_CD3POS_B	1	POST	CD8	POST_CD8	31	0.94	40	0.95	TGTGTGGTTTCAGATGGCCAGAAGCTGCTCTTT	CVVSDGQKLLF	TGTGCCAGCTCACCCTGGACTGGCATAGGCCAGGACGAGCAGTACTTC	CASSPWTGIGQDEQYF	ALPHA_628	BETA_632	ALPHA_628-BETA_632	1	1	1	1
094_F12_62_020_PRE_CD3POS_B	1	PRE	CD8	PRE_CD8	110	0.87	137	1	TGTGCTCTAGACATCTATGGTCAGAATTTTGTCTTT	CALDIYGQNFVF	TGTGCCAGCAGTTTACCCATAGCGGGAGCAGGCGCCGGGGAGCTGTTTTTT	CASSLPIAGAGAGELFF	ALPHA_327	BETA_582	ALPHA_327-BETA_582	1	4	1	1
095_G12_62_020_POST_CD3POS_A	1	POST	CD8	POST_CD8	16	1	52	1	TGTGCTCTCAAGAACTCAAATTCCGGGTATGCACTCAACTTC	CALKNSNSGYALNF	TGTGCCAGCAGCTTTGCTTCGGGGACGCAAGAGACCCAGTACTTC	CASSFASGTQETQYF	ALPHA_332	BETA_450	ALPHA_332-BETA_450	7	12	7	2
095_G12_62_020_POST_CD3POS_B	0	POST	CD4	POST_CD4	40	1	123	1	TGTGCTGTGAGTGATACTATATCTAACTTTGGAAATGAGAAATTAACCTTT	CAVSDTISNFGNEKLTF	TGCAGCGTCTTGAATGTGGGGCAGTACGAGCAGTACTTC	CSVLNVGQYEQYF	ALPHA_477	BETA_7	ALPHA_477-BETA_7	1	1	1	1
095_G12_62_020_PRE_CD3POS_B	0	PRE	CD4	PRE_CD4	18	0.86	30	1	TGTGCTGTGAGAGATGAAAGGACAGGAGGAAGCTACATACCTACATTT	CAVRDERTGGSYIPTF	TGTGCCACCAGCAGAGTTTTACCGAGGGGCACTGAAGCTTTCTTT	CATSRVLPRGTEAFF	ALPHA_453	BETA_170	ALPHA_453-BETA_170	1	1	1	1
001_A1_62_030_POST_CD3POS_C	0	POST	CD4	POST_CD4	261	1	581	1	TGTGCTGGGTCGAGGGGGGGTGCTACAAACAAGCTCATCTTT	CAGSRGGATNKLIF	TGCGCCAGCAGCCCAATGACGGAAGAGACCCAGTACTTC	CASSPMTEETQYF	ALPHA_423	BETA_113	ALPHA_423-BETA_113	1	1	1	1
001_A1_62_030_PRE_CD3POS_A	2	PRE	CD8	PRE_CD8	110	1	53	0.98	TGTGCTGTGAGTGCACCTGGTGGCTACAATAAGCTGATTTTT	CAVSAPGGYNKLIF	TGTGCCAGCAGTGAAGTCAGGGGGAGCAATCAGCCCCAGCATTTT	CASSEVRGSNQPQHF	ALPHA_481	BETA_508	ALPHA_481-BETA_508	5	5	5	2
001_A1_62_030_PRE_CD3POS_B	2	PRE	CD8	PRE_CD8	109	1	18	1	TGCATCCTGCCCTTGGCTGGTGGTACTAGCTATGGAAAGCTGACATTT	CILPLAGGTSYGKLTF	TGTGCCAGCAGCTTAGGACAAGCCTACGAGCAGTACTTC	CASSLGQAYEQYF	ALPHA_13	BETA_395	ALPHA_13-BETA_395	1	1	1	1
002_B1_62_030_PRE_CD3POS_A	0	PRE	CD4	PRE_CD4	140	0.99	87	1	TGTGCAGCCTTAATTCAGGGAGCCCAGAAGCTGGTATTT	CAALIQGAQKLVF	TGTGCCAGTAGTCTAAAACCGGGACAGGCGTTTTGGGAGCAGTTCTTC	CASSLKPGQAFWEQFF	ALPHA_175	BETA_670	ALPHA_175-BETA_670	1	1	1	1
002_B1_62_030_PRE_CD3POS_B	1	PRE	CD8	PRE_CD8	115	1	165	1	TGTGCCGTGAGTGGGAACAACAGACTCGCTTTT	CAVSGNNRLAF	TGTGCCAGCAGCGGACAGGTAACTGAAGCTTTCTTT	CASSGQVTEAFF	ALPHA_246	BETA_325	ALPHA_246-BETA_325	6	8	6	2
003_C1_62_030_POST_CD3POS_C	2	POST	CD8	POST_CD8	159	1			TGTGCTCTTGGGCCAAATCTGTACTGGGGATCTTTCTCCTTCTACACCGATAAACTCATCTTT	CALGPNLYWGSFSFYTDKLIF			ALPHA_379		ALPHA_379-NA	1			0
003_C1_62_030_PRE_CD3POS_A	0	PRE	CD4	PRE_CD4			56	1			TGTGCCAGCAGTCCTGGACGGAGCTCTGGAAACACCATATATTTT	CASSPGRSSGNTIYF		BETA_493	NA-BETA_493		1		0
003_C1_62_030_PRE_CD3POS_B	2	PRE	CD8	PRE_CD8			288	0.6			TGTGCCAGCAGCCAGGGGCGGGAGGGCCAAAATGAGCAGTTCTTC	CASSQGREGQNEQFF		BETA_250	NA-BETA_250		2		0
004_D1_62_030_POST_CD3POS_B	0	POST	CD4	POST_CD4	1096	1	1219	1	TGTGCAGCAACTGCTGGTGGTACTAGCTATGGAAAGCTGACATTT	CAATAGGTSYGKLTF	TGTGCCAGTAGAAGACAGCCTAATGGCTACACCTTC	CASRRQPNGYTF	ALPHA_119	BETA_650	ALPHA_119-BETA_650	2	2	2	2
004_D1_62_030_PRE_CD3POS_A	2	PRE	CD8	PRE_CD8			4	0.67			TGTGCCAGCAGCCTCCATGCGGGAGGGTCGAGCTCCTACAATGAGCAGTTCTTC	CASSLHAGGSSSYNEQFF		BETA_306	NA-BETA_306		2		0
005_E1_62_030_PRE_CD3POS_A	0	PRE	CD4	PRE_CD4	222	1	51	1	TGTGCAGCAGGGGATGACAAGATCATCTTT	CAAGDDKIIF	TGCGCCAGCAACCCATTCGGGCCGACAGGGGCCTCCCTTAACTATGGCTACACCTTC	CASNPFGPTGASLNYGYTF	ALPHA_163	BETA_80	ALPHA_163-BETA_80	2	2	2	2
005_E1_62_030_PRE_CD3POS_B	0	PRE	CD4	PRE_CD4	107	1	411	1	TGTGCTGGGCAAACCAGTGGCTCTAGGTTGACCTTT	CAGQTSGSRLTF	TGTGCCAGCAGCCCCGGGACAGGGGTTCGCGAGCAGTACTTC	CASSPGTGVREQYF	ALPHA_410	BETA_273	ALPHA_410-BETA_273	1	1	1	1
006_F1_62_030_POST_CD3POS_C	2	POST	CD8	POST_CD8	136	1	37	1	TGTGCTGTGGATGACAACAATGACATGCGCTTT	CAVDDNNDMRF	TGTGCCAGCAGAACTGGGACTAGCGTATACTACGAGCAGTACTTC	CASRTGTSVYYEQYF	ALPHA_507	BETA_201	ALPHA_507-BETA_201	1	1	1	1
006_F1_62_030_PRE_CD3POS_A	0	PRE	CD4	PRE_CD4	70	1	183	1	TGTGCTCTGAGTGAGGCTTTTTCTGGTTCTGCAAGGCAACTGACCTTT	CALSEAFSGSARQLTF	TGTGCCAGCAGTTCGGGACAGGGGAGACACACCGGGGAGCTGTTTTTT	CASSSGQGRHTGELFF	ALPHA_354	BETA_572	ALPHA_354-BETA_572	1	1	1	1
007_G1_62_030_PRE_CD3POS_B	2	PRE	CD8	PRE_CD8	187	0.59	312	1	TGTGCAATGGGCCCGGGATATGGTGGTGCTACAAACAAGCTCATCTTT	CAMGPGYGGATNKLIF	TGCGCCAGCAGCCACCCCGAGAAGGAGGCGGGATACGAGCAGTACTTC	CASSHPEKEAGYEQYF	ALPHA_78	BETA_111	ALPHA_78-BETA_111	1	1	1	1
008_H1_62_030_POST_CD3POS_C	0	POST	CD4	POST_CD4	418	1	220	1	TGTGGGACTGGAGGCTTCAAAACTATCTTT	CGTGGFKTIF	TGTGCCAGCAGCTCCACAGGGGCCATGAACACTGAAGCTTTCTTT	CASSSTGAMNTEAFF	ALPHA_589	BETA_349	ALPHA_589-BETA_349	1	1	1	1
008_H1_62_030_PRE_CD3POS_A	2	PRE	CD8	PRE_CD8			84	1			TGTGCCAGCAGCCCCCAACGGGGAGAAAAACTGTTTTTT	CASSPQRGEKLFF		BETA_265	NA-BETA_265		3		0
009_A2_62_030_POST_CD3POS_C	2	POST	CD8	POST_CD8	98	1	181	1	TGTGCTACGGTTCTGCCTTATAACCAGGGAGGAAAGCTTATCTTC	CATVLPYNQGGKLIF	TGTGCCAGCAGTACCGCCCATATGACGGTTAGCACAGATACGCAGTATTTT	CASSTAHMTVSTDTQYF	ALPHA_314	BETA_470	ALPHA_314-BETA_470	1	2	1	1
009_A2_62_030_PRE_CD3POS_A	0	PRE	CD4	PRE_CD4	36	1	107	1	TGTGCTGCGGACCGGAATTCAGGAAACACACCTCTTGTCTTT	CAADRNSGNTPLVF	TGTGCCAGCAGTTGGCGGGTTGCAGGGGGCAGCGCTTTCTTT	CASSWRVAGGSAFF	ALPHA_406	BETA_574	ALPHA_406-BETA_574	1	1	1	1
009_A2_62_030_PRE_CD3POS_B	2	PRE	CD8	PRE_CD8	86	1			TGTGCTGTGCCTTCAGGAGGAGGTGCTGACGGACTCACCTTT	CAVPSGGGADGLTF			ALPHA_498		ALPHA_498-NA	1			0
010_B2_62_030_PRE_CD3POS_B	1	PRE	CD8	PRE_CD8	308	1	50	1	TGTGCTTGTACCGGCACTGCCAGTAAACTCACCTTT	CACTGTASKLTF	TGCAGTGCTAGAGATCGGTCTAGCGGGATTCCAGATACGCAGTATTTT	CSARDRSSGIPDTQYF	ALPHA_569	BETA_32	ALPHA_569-BETA_32	9	8	7	2
011_C2_62_030_POST_CD3POS_B	2	POST	CD8	POST_CD8			270	1			TGTGCCAGCAGTACCGCCCATATGACGGTTAGCACAGATACGCAGTATTTT	CASSTAHMTVSTDTQYF		BETA_470	NA-BETA_470		2		0
011_C2_62_030_PRE_CD3POS_A	2	PRE	CD8	PRE_CD8	37	1	41	0.95	TGCCTCGTGGGTGTCAGCAATGCAGGCAACATGCTCACCTTT	CLVGVSNAGNMLTF	TGTGCCAGCAGCCCCCGGACTAGCGGCTCCTACGAGCAGTACTTC	CASSPRTSGSYEQYF	ALPHA_39	BETA_269	ALPHA_39-BETA_269	1	1	1	1
012_D2_62_030_POST_CD3POS_B	2	POST	CD8	POST_CD8	735	1	518	1	TGCATCCTGAGTCCTGCTGGTGGTACTAGCTATGGAAAGCTGACATTT	CILSPAGGTSYGKLTF	TGTGCCAGCAGAACACAGGGGGCTAACTATGGCTACACCTTC	CASRTQGANYGYTF	ALPHA_11	BETA_200	ALPHA_11-BETA_200	1	1	1	1
012_D2_62_030_POST_CD3POS_C	2	POST	CD8	POST_CD8	83	0.59	8	1	TGTGCTTTCATGAAGGAAGGTAACCAGTTCTATTTT	CAFMKEGNQFYF	TGTGCCAGCAGTCCGTTAGCGGGAGGGTGGGGAGACGAGCAGTACTTC	CASSPLAGGWGDEQYF	ALPHA_574	BETA_491	ALPHA_574-BETA_491	1	1	1	1
013_E2_62_030_PRE_CD3POS_A	1	PRE	CD8	PRE_CD8	105	1	38	1	TGTGCCGTGAGTGGGAACAACAGACTCGCTTTT	CAVSGNNRLAF	TGTGCCAGCAGCGGACAGGTAACTGAAGCTTTCTTT	CASSGQVTEAFF	ALPHA_246	BETA_325	ALPHA_246-BETA_325	6	8	6	2
014_F2_62_030_PRE_CD3POS_B	2	PRE	CD8	PRE_CD8	428	1	126	1	TGTGCTGTGAGTGCACCTGGTGGCTACAATAAGCTGATTTTT	CAVSAPGGYNKLIF	TGTGCCAGCAGTGAAGTCAGGGGGAGCAATCAGCCCCAGCATTTT	CASSEVRGSNQPQHF	ALPHA_481	BETA_508	ALPHA_481-BETA_508	5	5	5	2
015_G2_62_030_POST_CD3POS_C	0	POST	CD4	POST_CD4	563	1	158	1	TGTGCAGAGGGGACCTCTGGTGGCTACAATAAGCTGATTTTT	CAEGTSGGYNKLIF	TGTGCCAGCAGTGAAGGGGGAACTGTAAGGGATACGCAGTATTTT	CASSEGGTVRDTQYF	ALPHA_108	BETA_507	ALPHA_108-BETA_507	1	1	1	1
015_G2_62_030_PRE_CD3POS_A	2	PRE	CD8	PRE_CD8			122	1			TGTGCCAGCAGCACCGGACAGGGGACCGGGGAGCTGTTTTTT	CASSTGQGTGELFF		BETA_217	NA-BETA_217		1		0
015_G2_62_030_PRE_CD3POS_B	1	PRE	CD8	PRE_CD8	241	1	280	1	TGTGCCGTGAGTGGGAACAACAGACTCGCTTTT	CAVSGNNRLAF	TGTGCCAGCAGCGGACAGGTAACTGAAGCTTTCTTT	CASSGQVTEAFF	ALPHA_246	BETA_325	ALPHA_246-BETA_325	6	8	6	2
016_H2_62_030_PRE_CD3POS_A	0	PRE	CD4	PRE_CD4	18	1	14	1	TGTGCTGTGAGGGAAACTGGGGCAAACAACCTCTTCTTT	CAVRETGANNLFF	TGTGCCAGCTCACCTCTAGGACTGGACGCAGATACGCAGTATTTT	CASSPLGLDADTQYF	ALPHA_465	BETA_636	ALPHA_465-BETA_636	1	2	1	1
016_H2_62_030_PRE_CD3POS_B	1	PRE	CD8	PRE_CD8	372	1	260	1	TGTGCTGTGAGACACAATTATGGAGGAAGCCAAGGAAATCTCATCTTT	CAVRHNYGGSQGNLIF	TGTGCCAGCAGCCTTGGTCCGACAGGGGCGAACTATGGCTACACCTTC	CASSLGPTGANYGYTF	ALPHA_443	BETA_312	ALPHA_443-BETA_312	1	1	1	1
019_C3_62_030_POST_CD3POS_B	0	POST	CD4	POST_CD4	689	0.66	49	1	TGTGCAATTGAGGGCCCGGGTTTAAGTGTAGGGGGCTCTAGCAACACAGGCAAACTAATCTTT	CAIEGPGLSVGGSSNTGKLIF	TGTGCCAGCAGTTACGGCGGACAGGTAGCTAATGAAAAACTGTTTTTT	CASSYGGQVANEKLFF	ALPHA_82	BETA_548	ALPHA_82-BETA_548	1	1	1	1
019_C3_62_030_POST_CD3POS_C	0	POST	CD4	POST_CD4			701	1			TGTGCCAGCAGCTTAGCCAGGGGGCCCATGAACACTGAAGCTTTCTTT	CASSLARGPMNTEAFF		BETA_386	NA-BETA_386		1		0
019_C3_62_030_PRE_CD3POS_B	1	PRE	CD8	PRE_CD8	155	1	28	1	TGTGCCGTGAGTGGGAACAACAGACTCGCTTTT	CAVSGNNRLAF	TGTGCCAGCAGCGGACAGGTAACTGAAGCTTTCTTT	CASSGQVTEAFF	ALPHA_246	BETA_325	ALPHA_246-BETA_325	6	8	6	2
020_D3_62_030_PRE_CD3POS_A	0	PRE	CD4	PRE_CD4	36	1	14	1	TGTGCAGAGGGGCCCCCTGACAGCTGGGGGAAATTGCAGTTT	CAEGPPDSWGKLQF	TGCAGTGCTAGATACAGCTCCTATAATTCACCCCTCCACTTT	CSARYSSYNSPLHF	ALPHA_109	BETA_44	ALPHA_109-BETA_44	1	1	1	1
020_D3_62_030_PRE_CD3POS_B	0	PRE	CD4	PRE_CD4			111	1			TGTGCCAGTATGACAGGTATGACCACTGAAGCTTTCTTT	CASMTGMTTEAFF		BETA_678	NA-BETA_678		1		0
021_E3_62_030_PRE_CD3POS_B	1	PRE	CD8	PRE_CD8	99	1	40	1	TGTGCTCTGAGTGACGGCTCATCAGGAGGAAGCTACATACCTACATTT	CALSDGSSGGSYIPTF	TGTGCCAGCAGCCCCCAACGGGGAGAAAAACTGTTTTTT	CASSPQRGEKLFF	ALPHA_348	BETA_265	ALPHA_348-BETA_265	1	3	1	1
022_F3_62_030_POST_CD3POS_C	2	POST	CD8	POST_CD8	343	1	514	1	TGTGCCGTGAACAGTTACGACTACAAGCTCAGCTTT	CAVNSYDYKLSF	TGTGCCAGCAGCCTCCATGCGGGAGGGTCGAGCTCCTACAATGAGCAGTTCTTC	CASSLHAGGSSSYNEQFF	ALPHA_230	BETA_306	ALPHA_230-BETA_306	1	2	1	1
022_F3_62_030_PRE_CD3POS_A	0	PRE	CD4	PRE_CD4	60	1	445	1	TGTGCTGTGGCCCCCTCTGGTTCTGCAAGGCAACTGACCTTT	CAVAPSGSARQLTF	TGCGCCAGCAGCTTGGTCCAGGGTGGATCCTACGAGCAGTACTTC	CASSLVQGGSYEQYF	ALPHA_512	BETA_145	ALPHA_512-BETA_145	1	1	1	1
022_F3_62_030_PRE_CD3POS_B	1	PRE	CD8	PRE_CD8	28	1	27	1	TGTGCAGCCCCAGCCACCGGTAACCAGTTCTATTTT	CAAPATGNQFYF	TGTGCCAGCAGCTTGGGGACTAGCTTCTCCGGGGAGCTGTTTTTT	CASSLGTSFSGELFF	ALPHA_167	BETA_438	ALPHA_167-BETA_438	2	2	2	2
023_G3_62_030_POST_CD3POS_C	0	POST	CD4	POST_CD4	97	1	192	0.85	TGTGTGGTGAGCCCCCACCAGGCAGGAACTGCTCTGATCTTT	CVVSPHQAGTALIF	TGTGCCAGTAGCCGACAGGGGAACACTGAAGCTTTCTTT	CASSRQGNTEAFF	ALPHA_617	BETA_652	ALPHA_617-BETA_652	1	1	1	1
023_G3_62_030_PRE_CD3POS_B	0	PRE	CD4	PRE_CD4	232	1	300	1	TGCATCGTCGGCAGAGGAGGAGGTGCTGACGGACTCACCTTT	CIVGRGGGADGLTF	TGTGCCAGCAGTTTAACGCGCTCTGGAAACACCATATATTTT	CASSLTRSGNTIYF	ALPHA_25	BETA_579	ALPHA_25-BETA_579	1	1	1	1
024_H3_62_030_PRE_CD3POS_A	0	PRE	CD4	PRE_CD4	45	1	132	1	TGTGCAGAGAAATATCAGGGCGGATCTGAAAAGCTGGTCTTT	CAEKYQGGSEKLVF	TGCGCCAGCAGCCAACCGGGTAGGGGGACCGGGGAGCTGTTTTTT	CASSQPGRGTGELFF	ALPHA_90	BETA_92	ALPHA_90-BETA_92	1	1	1	1
024_H3_62_030_PRE_CD3POS_B	0	PRE	CD4	PRE_CD4	136	1			TGTGCAGGGCCTAATGCTGGTGGTACTAGCTATGGAAAGCTGACATTT	CAGPNAGGTSYGKLTF			ALPHA_197		ALPHA_197-NA	1			0
025_A4_62_030_POST_CD3POS_B	0	POST	CD4	POST_CD4	381	1	525	1	TGTGCTGTTTACAGCAGTGCTTCCAAGATAATCTTT	CAVYSSASKIIF	TGTGCCATCAGTGACGAGCGGAACACAGATACGCAGTATTTT	CAISDERNTDTQYF	ALPHA_543	BETA_683	ALPHA_543-BETA_683	1	1	1	1
025_A4_62_030_POST_CD3POS_C	0	POST	CD4	POST_CD4	165	1	114	0.84	TGTGCTGTGGGTAACACCAATGCAGGCAAATCAACCTTT	CAVGNTNAGKSTF	TGTGCCAGCAGCCAATGGGGCAGGGAACTGTTTTTT	CASSQWGRELFF	ALPHA_523	BETA_243	ALPHA_523-BETA_243	1	1	1	1
025_A4_62_030_PRE_CD3POS_B	1	PRE	CD8	PRE_CD8			64	1			TGTGCCAGCAGCTTAGGTCCCCGCAACAATGAGCAGTTCTTC	CASSLGPRNNEQFF		BETA_402	NA-BETA_402		1		0
[truncated: 278 more rows]
